# Supplementary material
Source: publisher figshare collection journal article supplement (https://gsajournals.figshare.com/ndownloader/files/25533044)
Supplement: Supplementary file 1 [file 25533044]

Archive with 149 entries (147 files):
- Supplementary Material/
- __MACOSX/._Supplementary Material
- Supplementary Material/Supplemental Information.pdf
- __MACOSX/Supplementary Material/._Supplemental Information.pdf
- Supplementary Material/.DS_Store
- __MACOSX/Supplementary Material/._.DS_Store
- Supplementary Material/File S3.py
- __MACOSX/Supplementary Material/._File S3.py
- Supplementary Material/File S1.nb
- __MACOSX/Supplementary Material/._File S1.nb
- Supplementary Material/Supplemental Information.tex
- __MACOSX/Supplementary Material/._Supplemental Information.tex
- Supplementary Material/File S2.nb
- __MACOSX/Supplementary Material/._File S2.nb
- Supplementary Material/data/
- Supplementary Material/SI_birth_rate.pdf
- __MACOSX/Supplementary Material/._SI_birth_rate.pdf
- Supplementary Material/data/per_hmap_b3_sm0_fm1_mm2_delta1_c0.5.csv
- __MACOSX/Supplementary Material/data/._per_hmap_b3_sm0_fm1_mm2_delta1_c0.5.csv
- Supplementary Material/data/per_hmap_b2.4_sm0_fm20_mm20_delta1_c0.75.csv
- __MACOSX/Supplementary Material/data/._per_hmap_b2.4_sm0_fm20_mm20_delta1_c0.75.csv
- Supplementary Material/data/per_hmap_b2.4_sm0_fm1_mm2_delta1_c0.75.csv
- __MACOSX/Supplementary Material/data/._per_hmap_b2.4_sm0_fm1_mm2_delta1_c0.75.csv
- Supplementary Material/data/per_hmap_b2.4_sm0_fm20_mm20_delta0.5_c0.6666666666666666.csv
- __MACOSX/Supplementary Material/data/._per_hmap_b2.4_sm0_fm20_mm20_delta0.5_c0.6666666666666666.csv
- Supplementary Material/data/per_hmap_b3_sm0_fm20_mm2_delta0.5_c1.csv
- __MACOSX/Supplementary Material/data/._per_hmap_b3_sm0_fm20_mm2_delta0.5_c1.csv
- Supplementary Material/data/pop_hmap_b2.4_sm0_fm20_mm20_delta1_c1.csv
- __MACOSX/Supplementary Material/data/._pop_hmap_b2.4_sm0_fm20_mm20_delta1_c1.csv
- Supplementary Material/data/per_hmap_b3_sm0_fm2_mm2_delta1_c0.5.csv
- __MACOSX/Supplementary Material/data/._per_hmap_b3_sm0_fm2_mm2_delta1_c0.5.csv
- Supplementary Material/data/per_hmap_b2.4_sm0_fm20_mm2_delta1_c0.75.csv
- __MACOSX/Supplementary Material/data/._per_hmap_b2.4_sm0_fm20_mm2_delta1_c0.75.csv
- Supplementary Material/data/per_hmap_b2.4_sm0_fm2_mm2_delta0.5_c1.csv
- __MACOSX/Supplementary Material/data/._per_hmap_b2.4_sm0_fm2_mm2_delta0.5_c1.csv
- Supplementary Material/data/pop_hmap_b2.4_sm0_fm1_mm20_delta0.5_c1.csv
- __MACOSX/Supplementary Material/data/._pop_hmap_b2.4_sm0_fm1_mm20_delta0.5_c1.csv
- Supplementary Material/data/pop_hmap_b2.4_sm0_fm2_mm20_delta1_c0.5.csv
- __MACOSX/Supplementary Material/data/._pop_hmap_b2.4_sm0_fm2_mm20_delta1_c0.5.csv
- Supplementary Material/data/per_hmap_b2.4_sm0_fm20_mm2_delta1_c0.5.csv
- __MACOSX/Supplementary Material/data/._per_hmap_b2.4_sm0_fm20_mm2_delta1_c0.5.csv
- Supplementary Material/data/per_hmap_b2.4_sm0_fm1_mm2_delta0.5_c1.csv
- __MACOSX/Supplementary Material/data/._per_hmap_b2.4_sm0_fm1_mm2_delta0.5_c1.csv
- Supplementary Material/data/pop_hmap_b2.4_sm0_fm2_mm2_delta1_c1.csv
- __MACOSX/Supplementary Material/data/._pop_hmap_b2.4_sm0_fm2_mm2_delta1_c1.csv
- Supplementary Material/data/per_hmap_b3_sm0_fm2_mm2_delta1_c1.csv
- __MACOSX/Supplementary Material/data/._per_hmap_b3_sm0_fm2_mm2_delta1_c1.csv
- Supplementary Material/data/per_hmap_b2.4_sm0_fm2_mm20_delta0.5_c1.csv
- __MACOSX/Supplementary Material/data/._per_hmap_b2.4_sm0_fm2_mm20_delta0.5_c1.csv
- Supplementary Material/data/pop_hmap_b2.4_sm0_fm20_mm2_delta0.5_c1.csv
- __MACOSX/Supplementary Material/data/._pop_hmap_b2.4_sm0_fm20_mm2_delta0.5_c1.csv
- Supplementary Material/data/per_hmap_b2.4_sm0_fm1_mm20_delta1_c0.75.csv
- __MACOSX/Supplementary Material/data/._per_hmap_b2.4_sm0_fm1_mm20_delta1_c0.75.csv
- Supplementary Material/data/per_hmap_b2.4_sm0_fm20_mm20_delta1_c0.5.csv
- __MACOSX/Supplementary Material/data/._per_hmap_b2.4_sm0_fm20_mm20_delta1_c0.5.csv
- Supplementary Material/data/per_hmap_b2.4_sm0_fm20_mm20_delta1_c1.csv
- __MACOSX/Supplementary Material/data/._per_hmap_b2.4_sm0_fm20_mm20_delta1_c1.csv
- Supplementary Material/data/per_hmap_b2.4_sm0_fm1_mm2_delta0.5_c0.6666666666666666.csv
- __MACOSX/Supplementary Material/data/._per_hmap_b2.4_sm0_fm1_mm2_delta0.5_c0.6666666666666666.csv
- Supplementary Material/data/pop_hmap_b2.4_sm0_fm1_mm2_delta1_c1.csv
- __MACOSX/Supplementary Material/data/._pop_hmap_b2.4_sm0_fm1_mm2_delta1_c1.csv
- Supplementary Material/data/per_hmap_b3_sm0_fm1_mm2_delta1_c1.csv
- __MACOSX/Supplementary Material/data/._per_hmap_b3_sm0_fm1_mm2_delta1_c1.csv
- Supplementary Material/data/per_hmap_b2.4_sm0_fm1_mm20_delta1_c0.5.csv
- __MACOSX/Supplementary Material/data/._per_hmap_b2.4_sm0_fm1_mm20_delta1_c0.5.csv
- Supplementary Material/data/pop_hmap_b2.4_sm0_fm1_mm2_delta0.5_c1.csv
- __MACOSX/Supplementary Material/data/._pop_hmap_b2.4_sm0_fm1_mm2_delta0.5_c1.csv
- Supplementary Material/data/per_hmap_b3_sm0_fm2_mm20_delta1_c0.5.csv
- __MACOSX/Supplementary Material/data/._per_hmap_b3_sm0_fm2_mm20_delta1_c0.5.csv
- Supplementary Material/data/per_hmap_b3_sm0_fm20_mm20_delta1_c0.5.csv
- __MACOSX/Supplementary Material/data/._per_hmap_b3_sm0_fm20_mm20_delta1_c0.5.csv
- Supplementary Material/data/per_hmap_b2.4_sm0_fm20_mm2_delta0.5_c0.6666666666666666.csv
- __MACOSX/Supplementary Material/data/._per_hmap_b2.4_sm0_fm20_mm2_delta0.5_c0.6666666666666666.csv
- Supplementary Material/data/per_hmap_b3_sm0_fm1_mm20_delta0.5_c1.csv
- __MACOSX/Supplementary Material/data/._per_hmap_b3_sm0_fm1_mm20_delta0.5_c1.csv
- Supplementary Material/data/pop_hmap_b2.4_sm0_fm20_mm20_delta0.5_c1.csv
- __MACOSX/Supplementary Material/data/._pop_hmap_b2.4_sm0_fm20_mm20_delta0.5_c1.csv
- Supplementary Material/data/pop_hmap_b2.4_sm0_fm2_mm2_delta0.5_c1.csv
- __MACOSX/Supplementary Material/data/._pop_hmap_b2.4_sm0_fm2_mm2_delta0.5_c1.csv
- Supplementary Material/data/per_hmap_b3_sm0_fm2_mm20_delta0.5_c1.csv
- __MACOSX/Supplementary Material/data/._per_hmap_b3_sm0_fm2_mm20_delta0.5_c1.csv
- Supplementary Material/data/pop_hmap_b2.4_sm0_fm1_mm2_delta1_c0.5.csv
- __MACOSX/Supplementary Material/data/._pop_hmap_b2.4_sm0_fm1_mm2_delta1_c0.5.csv
- Supplementary Material/data/per_hmap_b3_sm0_fm20_mm20_delta0.5_c1.csv
- __MACOSX/Supplementary Material/data/._per_hmap_b3_sm0_fm20_mm20_delta0.5_c1.csv
- Supplementary Material/data/per_hmap_b3_sm0_fm2_mm20_delta1_c1.csv
- __MACOSX/Supplementary Material/data/._per_hmap_b3_sm0_fm2_mm20_delta1_c1.csv
- Supplementary Material/data/per_hmap_b2.4_sm0_fm1_mm2_delta1_c1.csv
- __MACOSX/Supplementary Material/data/._per_hmap_b2.4_sm0_fm1_mm2_delta1_c1.csv
- Supplementary Material/data/pop_hmap_b2.4_sm0_fm1_mm20_delta1_c1.csv
- __MACOSX/Supplementary Material/data/._pop_hmap_b2.4_sm0_fm1_mm20_delta1_c1.csv
- Supplementary Material/data/per_hmap_b3_sm0_fm20_mm20_delta1_c1.csv
- __MACOSX/Supplementary Material/data/._per_hmap_b3_sm0_fm20_mm20_delta1_c1.csv
- Supplementary Material/data/pop_hmap_b2.4_sm0_fm2_mm2_delta1_c0.5.csv
- __MACOSX/Supplementary Material/data/._pop_hmap_b2.4_sm0_fm2_mm2_delta1_c0.5.csv
- Supplementary Material/data/pop_hmap_b2.4_sm0_fm20_mm20_delta1_c0.5.csv
- __MACOSX/Supplementary Material/data/._pop_hmap_b2.4_sm0_fm20_mm20_delta1_c0.5.csv
- Supplementary Material/data/per_hmap_b3_sm0_fm20_mm2_delta1_c1.csv
- __MACOSX/Supplementary Material/data/._per_hmap_b3_sm0_fm20_mm2_delta1_c1.csv
- Supplementary Material/data/per_hmap_b2.4_sm0_fm2_mm2_delta0.5_c0.6666666666666666.csv
- __MACOSX/Supplementary Material/data/._per_hmap_b2.4_sm0_fm2_mm2_delta0.5_c0.6666666666666666.csv
- Supplementary Material/data/per_hmap_b3_sm0_fm1_mm20_delta1_c0.5.csv
- __MACOSX/Supplementary Material/data/._per_hmap_b3_sm0_fm1_mm20_delta1_c0.5.csv
- Supplementary Material/data/pop_hmap_b2.4_sm0_fm20_mm2_delta1_c0.5.csv
- __MACOSX/Supplementary Material/data/._pop_hmap_b2.4_sm0_fm20_mm2_delta1_c0.5.csv
- Supplementary Material/data/per_hmap_b2.4_sm0_fm2_mm20_delta1_c0.5.csv
- __MACOSX/Supplementary Material/data/._per_hmap_b2.4_sm0_fm2_mm20_delta1_c0.5.csv
- Supplementary Material/data/pop_hmap_b2.4_sm0_fm2_mm20_delta1_c1.csv
- __MACOSX/Supplementary Material/data/._pop_hmap_b2.4_sm0_fm2_mm20_delta1_c1.csv
- Supplementary Material/data/per_hmap_b2.4_sm0_fm20_mm20_delta0.5_c1.csv
- __MACOSX/Supplementary Material/data/._per_hmap_b2.4_sm0_fm20_mm20_delta0.5_c1.csv
- Supplementary Material/data/per_hmap_b3_sm0_fm1_mm20_delta1_c1.csv
- __MACOSX/Supplementary Material/data/._per_hmap_b3_sm0_fm1_mm20_delta1_c1.csv
- Supplementary Material/data/per_hmap_b2.4_sm0_fm1_mm20_delta0.5_c1.csv
- __MACOSX/Supplementary Material/data/._per_hmap_b2.4_sm0_fm1_mm20_delta0.5_c1.csv
- Supplementary Material/data/pop_hmap_b2.4_sm0_fm20_mm2_delta1_c1.csv
- __MACOSX/Supplementary Material/data/._pop_hmap_b2.4_sm0_fm20_mm2_delta1_c1.csv
- Supplementary Material/data/pop_hmap_b2.4_sm0_fm1_mm20_delta1_c0.5.csv
- __MACOSX/Supplementary Material/data/._pop_hmap_b2.4_sm0_fm1_mm20_delta1_c0.5.csv
- Supplementary Material/data/per_hmap_b2.4_sm0_fm20_mm2_delta1_c1.csv
- __MACOSX/Supplementary Material/data/._per_hmap_b2.4_sm0_fm20_mm2_delta1_c1.csv
- Supplementary Material/data/per_hmap_b2.4_sm0_fm2_mm2_delta1_c0.5.csv
- __MACOSX/Supplementary Material/data/._per_hmap_b2.4_sm0_fm2_mm2_delta1_c0.5.csv
- Supplementary Material/data/per_hmap_b2.4_sm0_fm1_mm2_delta1_c0.5.csv
- __MACOSX/Supplementary Material/data/._per_hmap_b2.4_sm0_fm1_mm2_delta1_c0.5.csv
- Supplementary Material/data/per_hmap_b2.4_sm0_fm20_mm2_delta0.5_c1.csv
- __MACOSX/Supplementary Material/data/._per_hmap_b2.4_sm0_fm20_mm2_delta0.5_c1.csv
- Supplementary Material/data/pop_hmap_b2.4_sm0_fm2_mm20_delta0.5_c1.csv
- __MACOSX/Supplementary Material/data/._pop_hmap_b2.4_sm0_fm2_mm20_delta0.5_c1.csv
- Supplementary Material/data/per_hmap_b2.4_sm0_fm2_mm20_delta1_c1.csv
- __MACOSX/Supplementary Material/data/._per_hmap_b2.4_sm0_fm2_mm20_delta1_c1.csv
- Supplementary Material/data/per_hmap_b2.4_sm0_fm1_mm20_delta1_c1.csv
- __MACOSX/Supplementary Material/data/._per_hmap_b2.4_sm0_fm1_mm20_delta1_c1.csv
- Supplementary Material/data/per_hmap_b3_sm0_fm1_mm2_delta0.5_c1.csv
- __MACOSX/Supplementary Material/data/._per_hmap_b3_sm0_fm1_mm2_delta0.5_c1.csv
- Supplementary Material/data/per_hmap_b2.4_sm0_fm1_mm20_delta0.5_c0.6666666666666666.csv
- __MACOSX/Supplementary Material/data/._per_hmap_b2.4_sm0_fm1_mm20_delta0.5_c0.6666666666666666.csv
- Supplementary Material/data/per_hmap_b2.4_sm0_fm2_mm20_delta0.5_c0.6666666666666666.csv
- __MACOSX/Supplementary Material/data/._per_hmap_b2.4_sm0_fm2_mm20_delta0.5_c0.6666666666666666.csv
- Supplementary Material/data/per_hmap_b2.4_sm0_fm2_mm2_delta1_c1.csv
- __MACOSX/Supplementary Material/data/._per_hmap_b2.4_sm0_fm2_mm2_delta1_c1.csv
- Supplementary Material/data/per_hmap_b3_sm0_fm20_mm2_delta1_c0.5.csv
- __MACOSX/Supplementary Material/data/._per_hmap_b3_sm0_fm20_mm2_delta1_c0.5.csv
- Supplementary Material/data/per_hmap_b2.4_sm0_fm2_mm2_delta1_c0.75.csv
- __MACOSX/Supplementary Material/data/._per_hmap_b2.4_sm0_fm2_mm2_delta1_c0.75.csv
- Supplementary Material/data/per_hmap_b2.4_sm0_fm2_mm20_delta1_c0.75.csv
- __MACOSX/Supplementary Material/data/._per_hmap_b2.4_sm0_fm2_mm20_delta1_c0.75.csv
- Supplementary Material/data/per_hmap_b3_sm0_fm2_mm2_delta0.5_c1.csv
- __MACOSX/Supplementary Material/data/._per_hmap_b3_sm0_fm2_mm2_delta0.5_c1.csv
