# Supplementary material
Source: publisher figshare collection journal article supplement (https://gsajournals.figshare.com/ndownloader/files/25533044)
Supplement: Supplementary file 1 [file 25533044 › Supplementary Material/data/pop_hmap_b2.4_sm0_fm1_mm2_delta1_c1.csv]

1.610000000000000000e+02	1.610000000000000000e+02	1.610000000000000000e+02	1.610000000000000000e+02	1.610000000000000000e+02	1.610000000000000000e+02	1.610000000000000000e+02	1.610000000000000000e+02	1.610000000000000000e+02	1.854365455502896225e+02	2.267919350265322294e+02	2.482927218472242146e+02	2.604242516304127548e+02	2.662892048446551030e+02	2.696663948767602506e+02	2.690421768035808441e+02	2.676776062103993468e+02	2.647847351875787467e+02	2.613086609051202345e+02	2.581100239514855730e+02	2.546006400129622591e+02
1.610000000000000000e+02	1.610000000000000000e+02	1.610000000000000000e+02	1.610000000000000000e+02	1.610000000000000000e+02	1.610000000000000000e+02	1.610000000000000000e+02	1.610000000000000000e+02	1.610000000000000000e+02	1.610000000000000000e+02	2.195675267684746359e+02	2.406432552220467471e+02	2.527631209408460791e+02	2.588073401205312507e+02	2.598353080568719520e+02	2.580652612082584483e+02	2.543907904745187523e+02	2.497513917099224727e+02	2.451826497376787302e+02	2.408362753852141509e+02	2.360386255924171053e+02
1.610000000000000000e+02	1.610000000000000000e+02	1.610000000000000000e+02	1.610000000000000000e+02	1.610000000000000000e+02	1.610000000000000000e+02	1.610000000000000000e+02	1.610000000000000000e+02	1.610000000000000000e+02	1.610000000000000000e+02	2.113628225381779941e+02	2.337936671474689092e+02	2.448452791917772799e+02	2.496227909426013127e+02	2.489876908899420869e+02	2.452619799894681023e+02	2.394062509680018138e+02	2.340395423428599031e+02	2.286547744426891597e+02	2.231321327014217957e+02	2.176647553293156250e+02
1.610000000000000000e+02	1.610000000000000000e+02	1.610000000000000000e+02	1.610000000000000000e+02	1.610000000000000000e+02	1.610000000000000000e+02	1.610000000000000000e+02	1.610000000000000000e+02	1.610000000000000000e+02	1.610000000000000000e+02	2.033955465282479338e+02	2.260944432996771525e+02	2.374493593119185562e+02	2.399598770150673488e+02	2.366190758293838883e+02	2.307172195892574678e+02	2.243739562175581739e+02	2.179875678274606514e+02	2.115355450236966419e+02	2.061050552922590953e+02	2.002944486017571819e+02
1.610000000000000000e+02	1.610000000000000000e+02	1.610000000000000000e+02	1.610000000000000000e+02	1.610000000000000000e+02	1.610000000000000000e+02	1.610000000000000000e+02	1.610000000000000000e+02	1.610000000000000000e+02	1.610000000000000000e+02	1.924697209057398766e+02	2.173391737277993627e+02	2.296230848316156425e+02	2.292022948366175967e+02	2.237931447173153288e+02	2.162867825171142613e+02	2.086369267032774246e+02	2.020249839096600795e+02	1.941750043882745160e+02	1.899610321221695415e+02	1.865739863085834713e+02
1.610000000000000000e+02	1.610000000000000000e+02	1.610000000000000000e+02	1.610000000000000000e+02	1.610000000000000000e+02	1.610000000000000000e+02	1.610000000000000000e+02	1.610000000000000000e+02	1.610000000000000000e+02	1.610000000000000000e+02	1.610000000000000000e+02	2.105162550927080645e+02	2.195985812966576987e+02	2.176435718047092678e+02	2.099610979462875093e+02	2.016226083903809183e+02	1.937936884074324553e+02	1.867580305423907419e+02	1.790697735650342111e+02	1.610000000000000000e+02	1.610000000000000000e+02
1.610000000000000000e+02	1.610000000000000000e+02	1.610000000000000000e+02	1.610000000000000000e+02	1.610000000000000000e+02	1.610000000000000000e+02	1.610000000000000000e+02	1.610000000000000000e+02	1.610000000000000000e+02	1.610000000000000000e+02	1.610000000000000000e+02	2.026098604528699525e+02	2.098791093056495640e+02	2.056206073371949685e+02	1.958730911005792450e+02	1.870164560294892055e+02	1.778004212743549317e+02	1.610000000000000000e+02	1.610000000000000000e+02	1.610000000000000000e+02	1.610000000000000000e+02
1.610000000000000000e+02	1.610000000000000000e+02	1.610000000000000000e+02	1.610000000000000000e+02	1.610000000000000000e+02	1.610000000000000000e+02	1.610000000000000000e+02	1.610000000000000000e+02	1.610000000000000000e+02	1.610000000000000000e+02	1.610000000000000000e+02	1.956373968755485464e+02	2.004769495906936640e+02	1.919193727692937728e+02	1.811948393891522073e+02	1.610000000000000000e+02	1.610000000000000000e+02	1.610000000000000000e+02	1.610000000000000000e+02	1.610000000000000000e+02	1.610000000000000000e+02
1.610000000000000000e+02	1.610000000000000000e+02	1.610000000000000000e+02	1.610000000000000000e+02	1.610000000000000000e+02	1.610000000000000000e+02	1.610000000000000000e+02	1.610000000000000000e+02	1.610000000000000000e+02	1.610000000000000000e+02	1.610000000000000000e+02	1.873660406061669903e+02	1.894470247498683761e+02	1.780824117956819350e+02	1.610000000000000000e+02	1.610000000000000000e+02	1.610000000000000000e+02	1.610000000000000000e+02	1.610000000000000000e+02	1.610000000000000000e+02	1.610000000000000000e+02
1.610000000000000000e+02	1.610000000000000000e+02	1.610000000000000000e+02	1.610000000000000000e+02	1.610000000000000000e+02	1.610000000000000000e+02	1.610000000000000000e+02	1.610000000000000000e+02	1.610000000000000000e+02	1.610000000000000000e+02	1.610000000000000000e+02	1.810207345971564337e+02	1.780579252238019876e+02	1.610000000000000000e+02	1.610000000000000000e+02	1.610000000000000000e+02	1.610000000000000000e+02	1.610000000000000000e+02	1.610000000000000000e+02	1.610000000000000000e+02	1.610000000000000000e+02
1.610000000000000000e+02	1.610000000000000000e+02	1.610000000000000000e+02	1.610000000000000000e+02	1.610000000000000000e+02	1.610000000000000000e+02	1.610000000000000000e+02	1.610000000000000000e+02	1.610000000000000000e+02	1.610000000000000000e+02	1.610000000000000000e+02	1.773285939968404534e+02	1.610000000000000000e+02	1.610000000000000000e+02	1.610000000000000000e+02	1.610000000000000000e+02	1.610000000000000000e+02	1.610000000000000000e+02	1.610000000000000000e+02	1.610000000000000000e+02	1.610000000000000000e+02
1.610000000000000000e+02	1.610000000000000000e+02	1.610000000000000000e+02	1.610000000000000000e+02	1.610000000000000000e+02	1.610000000000000000e+02	1.610000000000000000e+02	1.610000000000000000e+02	1.610000000000000000e+02	1.610000000000000000e+02	1.610000000000000000e+02	1.610000000000000000e+02	1.610000000000000000e+02	1.610000000000000000e+02	1.610000000000000000e+02	1.610000000000000000e+02	1.610000000000000000e+02	1.610000000000000000e+02	1.610000000000000000e+02	1.610000000000000000e+02	1.610000000000000000e+02
1.610000000000000000e+02	1.610000000000000000e+02	1.610000000000000000e+02	1.610000000000000000e+02	1.610000000000000000e+02	1.610000000000000000e+02	1.610000000000000000e+02	1.610000000000000000e+02	1.610000000000000000e+02	1.610000000000000000e+02	1.610000000000000000e+02	1.610000000000000000e+02	1.610000000000000000e+02	1.610000000000000000e+02	1.610000000000000000e+02	1.610000000000000000e+02	1.610000000000000000e+02	1.610000000000000000e+02	1.610000000000000000e+02	1.610000000000000000e+02	1.610000000000000000e+02
1.610000000000000000e+02	1.610000000000000000e+02	1.610000000000000000e+02	1.610000000000000000e+02	1.610000000000000000e+02	1.610000000000000000e+02	1.610000000000000000e+02	1.610000000000000000e+02	1.610000000000000000e+02	1.610000000000000000e+02	1.610000000000000000e+02	1.610000000000000000e+02	1.610000000000000000e+02	1.610000000000000000e+02	1.610000000000000000e+02	1.610000000000000000e+02	1.610000000000000000e+02	1.610000000000000000e+02	1.610000000000000000e+02	1.610000000000000000e+02	1.610000000000000000e+02
1.610000000000000000e+02	1.610000000000000000e+02	1.610000000000000000e+02	1.610000000000000000e+02	1.610000000000000000e+02	1.610000000000000000e+02	1.610000000000000000e+02	1.610000000000000000e+02	1.610000000000000000e+02	1.610000000000000000e+02	1.610000000000000000e+02	1.610000000000000000e+02	1.610000000000000000e+02	1.610000000000000000e+02	1.610000000000000000e+02	1.610000000000000000e+02	1.610000000000000000e+02	1.610000000000000000e+02	1.610000000000000000e+02	1.610000000000000000e+02	1.610000000000000000e+02
1.610000000000000000e+02	1.610000000000000000e+02	1.610000000000000000e+02	1.610000000000000000e+02	1.610000000000000000e+02	1.610000000000000000e+02	1.610000000000000000e+02	1.610000000000000000e+02	1.610000000000000000e+02	1.610000000000000000e+02	1.610000000000000000e+02	1.610000000000000000e+02	1.610000000000000000e+02	1.610000000000000000e+02	1.610000000000000000e+02	1.610000000000000000e+02	1.610000000000000000e+02	1.610000000000000000e+02	1.610000000000000000e+02	1.610000000000000000e+02	1.610000000000000000e+02
1.610000000000000000e+02	1.610000000000000000e+02	1.610000000000000000e+02	1.610000000000000000e+02	1.610000000000000000e+02	1.610000000000000000e+02	1.610000000000000000e+02	1.610000000000000000e+02	1.610000000000000000e+02	1.610000000000000000e+02	1.610000000000000000e+02	1.610000000000000000e+02	1.610000000000000000e+02	1.610000000000000000e+02	1.610000000000000000e+02	1.610000000000000000e+02	1.610000000000000000e+02	1.610000000000000000e+02	1.610000000000000000e+02	1.610000000000000000e+02	1.610000000000000000e+02
1.610000000000000000e+02	1.610000000000000000e+02	1.610000000000000000e+02	1.610000000000000000e+02	1.610000000000000000e+02	1.610000000000000000e+02	1.610000000000000000e+02	1.610000000000000000e+02	1.610000000000000000e+02	1.610000000000000000e+02	1.610000000000000000e+02	1.610000000000000000e+02	1.610000000000000000e+02	1.610000000000000000e+02	1.610000000000000000e+02	1.610000000000000000e+02	1.610000000000000000e+02	1.610000000000000000e+02	1.610000000000000000e+02	1.610000000000000000e+02	1.610000000000000000e+02
1.610000000000000000e+02	1.610000000000000000e+02	1.610000000000000000e+02	1.610000000000000000e+02	1.610000000000000000e+02	1.610000000000000000e+02	1.610000000000000000e+02	1.610000000000000000e+02	1.610000000000000000e+02	1.610000000000000000e+02	1.610000000000000000e+02	1.610000000000000000e+02	1.610000000000000000e+02	1.610000000000000000e+02	1.610000000000000000e+02	1.610000000000000000e+02	1.610000000000000000e+02	1.610000000000000000e+02	1.610000000000000000e+02	1.610000000000000000e+02	1.610000000000000000e+02
1.610000000000000000e+02	1.610000000000000000e+02	1.610000000000000000e+02	1.610000000000000000e+02	1.610000000000000000e+02	1.610000000000000000e+02	1.610000000000000000e+02	1.610000000000000000e+02	1.610000000000000000e+02	1.610000000000000000e+02	1.610000000000000000e+02	1.610000000000000000e+02	1.610000000000000000e+02	1.610000000000000000e+02	1.610000000000000000e+02	1.610000000000000000e+02	1.610000000000000000e+02	1.610000000000000000e+02	1.610000000000000000e+02	1.610000000000000000e+02	1.610000000000000000e+02
1.610000000000000000e+02	1.610000000000000000e+02	1.610000000000000000e+02	1.610000000000000000e+02	1.610000000000000000e+02	1.610000000000000000e+02	1.610000000000000000e+02	1.610000000000000000e+02	1.610000000000000000e+02	1.610000000000000000e+02	1.610000000000000000e+02	1.610000000000000000e+02	1.610000000000000000e+02	1.610000000000000000e+02	1.610000000000000000e+02	1.610000000000000000e+02	1.610000000000000000e+02	1.610000000000000000e+02	1.610000000000000000e+02	1.610000000000000000e+02	1.610000000000000000e+02
