# Supplementary material
Source: publisher figshare collection journal article supplement (https://gsajournals.figshare.com/ndownloader/files/25533044)
Supplement: Supplementary file 1 [file 25533044 › Supplementary Material/data/pop_hmap_b2.4_sm0_fm1_mm20_delta1_c1.csv]

1.610000000000000000e+02	1.610000000000000000e+02	1.610000000000000000e+02	1.610000000000000000e+02	1.610000000000000000e+02	1.610000000000000000e+02	1.610000000000000000e+02	3.829563680132400236e+02	3.631946976141289269e+02	3.455957974485722275e+02	3.311349007217420422e+02	3.188171046962516471e+02	3.078809197823415502e+02	2.987487712831314184e+02	2.901399620214787092e+02	2.829892320822211218e+02	2.764728964207636750e+02	2.704665262418817520e+02	2.652224367600882715e+02	2.603501062937609163e+02	2.564652741208822704e+02
1.610000000000000000e+02	1.610000000000000000e+02	1.610000000000000000e+02	1.610000000000000000e+02	1.610000000000000000e+02	1.610000000000000000e+02	1.610000000000000000e+02	3.757244163594874067e+02	3.560288668677294481e+02	3.369804755539352641e+02	3.207430038366056806e+02	3.067951202387221201e+02	2.950887991730540421e+02	2.848282526865991713e+02	2.754145979086736702e+02	2.675361468442036426e+02	2.600021063717745733e+02	2.533375258233077716e+02	2.475047173951202524e+02	2.420383570300157601e+02	2.366398333218857033e+02
1.610000000000000000e+02	1.610000000000000000e+02	1.610000000000000000e+02	1.610000000000000000e+02	1.610000000000000000e+02	1.610000000000000000e+02	1.610000000000000000e+02	1.610000000000000000e+02	3.491565034228540298e+02	3.281788159181524520e+02	3.102051079515534298e+02	2.947629077960831410e+02	2.818637704054765436e+02	2.701530782791858201e+02	2.599845685372163757e+02	2.510260979462875071e+02	2.432662609950655508e+02	2.362116151357857348e+02	2.295806126031243650e+02	2.236426928300213604e+02	2.177906793048973384e+02
1.610000000000000000e+02	1.610000000000000000e+02	1.610000000000000000e+02	1.610000000000000000e+02	1.610000000000000000e+02	1.610000000000000000e+02	1.610000000000000000e+02	1.610000000000000000e+02	3.414466210286116166e+02	3.186809975174903116e+02	2.993856828671436574e+02	2.823189321610916522e+02	2.679741969457609798e+02	2.552270573028866352e+02	2.444692695403595906e+02	2.345924170616113997e+02	2.263620440964352269e+02	2.189803054239073674e+02	2.115240838831583119e+02	2.060304107424960591e+02	2.000759698086712319e+02
1.610000000000000000e+02	1.610000000000000000e+02	1.610000000000000000e+02	1.610000000000000000e+02	1.610000000000000000e+02	1.610000000000000000e+02	1.610000000000000000e+02	1.610000000000000000e+02	3.350022499880319629e+02	3.093860652612082731e+02	2.880193403226578539e+02	2.696797302223842507e+02	2.536306438086321862e+02	2.400300968120873222e+02	2.285895208004213259e+02	2.190748240700847305e+02	2.096829158203566124e+02	2.016167907921462472e+02	1.957030015797788280e+02	1.907191002783419833e+02	1.867493417588204352e+02
1.610000000000000000e+02	1.610000000000000000e+02	1.610000000000000000e+02	1.610000000000000000e+02	1.610000000000000000e+02	1.610000000000000000e+02	1.610000000000000000e+02	1.610000000000000000e+02	3.282624188169211834e+02	3.000871195365982089e+02	2.760055494794831361e+02	2.565356954788234702e+02	2.392873982257868590e+02	2.246069735951252540e+02	2.130506231349833399e+02	2.019795945234333487e+02	1.939101105845181792e+02	1.861848341232227426e+02	1.610000000000000000e+02	1.610000000000000000e+02	1.610000000000000000e+02
1.610000000000000000e+02	1.610000000000000000e+02	1.610000000000000000e+02	1.610000000000000000e+02	1.610000000000000000e+02	1.610000000000000000e+02	1.610000000000000000e+02	1.610000000000000000e+02	1.610000000000000000e+02	2.900401790416008794e+02	2.635061874670879547e+02	2.425065824117956765e+02	2.241979435159779541e+02	2.097579177010456419e+02	1.973440758293838826e+02	1.883417588204318065e+02	1.811932596103212347e+02	1.610000000000000000e+02	1.610000000000000000e+02	1.610000000000000000e+02	1.610000000000000000e+02
1.610000000000000000e+02	1.610000000000000000e+02	1.610000000000000000e+02	1.610000000000000000e+02	1.610000000000000000e+02	1.610000000000000000e+02	1.610000000000000000e+02	1.610000000000000000e+02	1.610000000000000000e+02	2.802072382593709676e+02	2.510578593996840198e+02	2.283499007574836810e+02	2.096585922415306413e+02	1.950454186413902278e+02	1.848046340179041636e+02	1.610000000000000000e+02	1.610000000000000000e+02	1.610000000000000000e+02	1.610000000000000000e+02	1.610000000000000000e+02	1.610000000000000000e+02
1.610000000000000000e+02	1.610000000000000000e+02	1.610000000000000000e+02	1.610000000000000000e+02	1.610000000000000000e+02	1.610000000000000000e+02	1.610000000000000000e+02	1.610000000000000000e+02	1.610000000000000000e+02	2.704255623260362995e+02	2.390836877708916006e+02	2.133856575230983026e+02	1.937133579076706837e+02	1.610000000000000000e+02	1.610000000000000000e+02	1.610000000000000000e+02	1.610000000000000000e+02	1.610000000000000000e+02	1.610000000000000000e+02	1.610000000000000000e+02	1.610000000000000000e+02
1.610000000000000000e+02	1.610000000000000000e+02	1.610000000000000000e+02	1.610000000000000000e+02	1.610000000000000000e+02	1.610000000000000000e+02	1.610000000000000000e+02	1.610000000000000000e+02	1.610000000000000000e+02	2.604544497103738649e+02	2.257842285413375691e+02	1.981188125329120453e+02	1.610000000000000000e+02	1.610000000000000000e+02	1.610000000000000000e+02	1.610000000000000000e+02	1.610000000000000000e+02	1.610000000000000000e+02	1.610000000000000000e+02	1.610000000000000000e+02	1.610000000000000000e+02
1.610000000000000000e+02	1.610000000000000000e+02	1.610000000000000000e+02	1.610000000000000000e+02	1.610000000000000000e+02	1.610000000000000000e+02	1.610000000000000000e+02	1.610000000000000000e+02	1.610000000000000000e+02	1.610000000000000000e+02	2.116709320695102576e+02	1.851785150078989091e+02	1.610000000000000000e+02	1.610000000000000000e+02	1.610000000000000000e+02	1.610000000000000000e+02	1.610000000000000000e+02	1.610000000000000000e+02	1.610000000000000000e+02	1.610000000000000000e+02	1.610000000000000000e+02
1.610000000000000000e+02	1.610000000000000000e+02	1.610000000000000000e+02	1.610000000000000000e+02	1.610000000000000000e+02	1.610000000000000000e+02	1.610000000000000000e+02	1.610000000000000000e+02	1.610000000000000000e+02	1.610000000000000000e+02	1.977698788836229653e+02	1.610000000000000000e+02	1.610000000000000000e+02	1.610000000000000000e+02	1.610000000000000000e+02	1.610000000000000000e+02	1.610000000000000000e+02	1.610000000000000000e+02	1.610000000000000000e+02	1.610000000000000000e+02	1.610000000000000000e+02
1.610000000000000000e+02	1.610000000000000000e+02	1.610000000000000000e+02	1.610000000000000000e+02	1.610000000000000000e+02	1.610000000000000000e+02	1.610000000000000000e+02	1.610000000000000000e+02	1.610000000000000000e+02	1.610000000000000000e+02	1.610000000000000000e+02	1.610000000000000000e+02	1.610000000000000000e+02	1.610000000000000000e+02	1.610000000000000000e+02	1.610000000000000000e+02	1.610000000000000000e+02	1.610000000000000000e+02	1.610000000000000000e+02	1.610000000000000000e+02	1.610000000000000000e+02
1.610000000000000000e+02	1.610000000000000000e+02	1.610000000000000000e+02	1.610000000000000000e+02	1.610000000000000000e+02	1.610000000000000000e+02	1.610000000000000000e+02	1.610000000000000000e+02	1.610000000000000000e+02	1.610000000000000000e+02	1.610000000000000000e+02	1.610000000000000000e+02	1.610000000000000000e+02	1.610000000000000000e+02	1.610000000000000000e+02	1.610000000000000000e+02	1.610000000000000000e+02	1.610000000000000000e+02	1.610000000000000000e+02	1.610000000000000000e+02	1.610000000000000000e+02
1.610000000000000000e+02	1.610000000000000000e+02	1.610000000000000000e+02	1.610000000000000000e+02	1.610000000000000000e+02	1.610000000000000000e+02	1.610000000000000000e+02	1.610000000000000000e+02	1.610000000000000000e+02	1.610000000000000000e+02	1.610000000000000000e+02	1.610000000000000000e+02	1.610000000000000000e+02	1.610000000000000000e+02	1.610000000000000000e+02	1.610000000000000000e+02	1.610000000000000000e+02	1.610000000000000000e+02	1.610000000000000000e+02	1.610000000000000000e+02	1.610000000000000000e+02
1.610000000000000000e+02	1.610000000000000000e+02	1.610000000000000000e+02	1.610000000000000000e+02	1.610000000000000000e+02	1.610000000000000000e+02	1.610000000000000000e+02	1.610000000000000000e+02	1.610000000000000000e+02	1.610000000000000000e+02	1.610000000000000000e+02	1.610000000000000000e+02	1.610000000000000000e+02	1.610000000000000000e+02	1.610000000000000000e+02	1.610000000000000000e+02	1.610000000000000000e+02	1.610000000000000000e+02	1.610000000000000000e+02	1.610000000000000000e+02	1.610000000000000000e+02
1.610000000000000000e+02	1.610000000000000000e+02	1.610000000000000000e+02	1.610000000000000000e+02	1.610000000000000000e+02	1.610000000000000000e+02	1.610000000000000000e+02	1.610000000000000000e+02	1.610000000000000000e+02	1.610000000000000000e+02	1.610000000000000000e+02	1.610000000000000000e+02	1.610000000000000000e+02	1.610000000000000000e+02	1.610000000000000000e+02	1.610000000000000000e+02	1.610000000000000000e+02	1.610000000000000000e+02	1.610000000000000000e+02	1.610000000000000000e+02	1.610000000000000000e+02
1.610000000000000000e+02	1.610000000000000000e+02	1.610000000000000000e+02	1.610000000000000000e+02	1.610000000000000000e+02	1.610000000000000000e+02	1.610000000000000000e+02	1.610000000000000000e+02	1.610000000000000000e+02	1.610000000000000000e+02	1.610000000000000000e+02	1.610000000000000000e+02	1.610000000000000000e+02	1.610000000000000000e+02	1.610000000000000000e+02	1.610000000000000000e+02	1.610000000000000000e+02	1.610000000000000000e+02	1.610000000000000000e+02	1.610000000000000000e+02	1.610000000000000000e+02
1.610000000000000000e+02	1.610000000000000000e+02	1.610000000000000000e+02	1.610000000000000000e+02	1.610000000000000000e+02	1.610000000000000000e+02	1.610000000000000000e+02	1.610000000000000000e+02	1.610000000000000000e+02	1.610000000000000000e+02	1.610000000000000000e+02	1.610000000000000000e+02	1.610000000000000000e+02	1.610000000000000000e+02	1.610000000000000000e+02	1.610000000000000000e+02	1.610000000000000000e+02	1.610000000000000000e+02	1.610000000000000000e+02	1.610000000000000000e+02	1.610000000000000000e+02
1.610000000000000000e+02	1.610000000000000000e+02	1.610000000000000000e+02	1.610000000000000000e+02	1.610000000000000000e+02	1.610000000000000000e+02	1.610000000000000000e+02	1.610000000000000000e+02	1.610000000000000000e+02	1.610000000000000000e+02	1.610000000000000000e+02	1.610000000000000000e+02	1.610000000000000000e+02	1.610000000000000000e+02	1.610000000000000000e+02	1.610000000000000000e+02	1.610000000000000000e+02	1.610000000000000000e+02	1.610000000000000000e+02	1.610000000000000000e+02	1.610000000000000000e+02
1.610000000000000000e+02	1.610000000000000000e+02	1.610000000000000000e+02	1.610000000000000000e+02	1.610000000000000000e+02	1.610000000000000000e+02	1.610000000000000000e+02	1.610000000000000000e+02	1.610000000000000000e+02	1.610000000000000000e+02	1.610000000000000000e+02	1.610000000000000000e+02	1.610000000000000000e+02	1.610000000000000000e+02	1.610000000000000000e+02	1.610000000000000000e+02	1.610000000000000000e+02	1.610000000000000000e+02	1.610000000000000000e+02	1.610000000000000000e+02	1.610000000000000000e+02
