# Supplementary material
Source: publisher figshare collection journal article supplement (https://gsajournals.figshare.com/ndownloader/files/25533044)
Supplement: Supplementary file 1 [file 25533044 › Supplementary Material/File S1.nb]

(* Content-type: application/vnd.wolfram.mathematica *)

(*** Wolfram Notebook File ***)
(* http://www.wolfram.com/nb *)

(* CreatedBy='Mathematica 12.0' *)

(*CacheID: 234*)
(* Internal cache information:
NotebookFileLineBreakTest
NotebookFileLineBreakTest
NotebookDataPosition[       158,          7]
NotebookDataLength[   1221691,      26708]
NotebookOptionsPosition[   1188479,      26205]
NotebookOutlinePosition[   1188840,      26221]
CellTagsIndexPosition[   1188797,      26218]
WindowFrame->Normal*)

(* Beginning of Notebook Content *)
Notebook[{

Cell[CellGroupData[{
Cell["\<\
X-linked meiotic drive can boost population size and persistence\
\>", "Title",
 CellChangeTimes->{{3.813651645117669*^9, 
  3.813651659263967*^9}},ExpressionUUID->"f963561f-d28a-4a18-ba87-\
157215e0ae56"],

Cell["Carl Mackintosh, Andrew Pomiankowski, and Michael F Scott", "Subtitle",
 CellChangeTimes->{{3.813651663235971*^9, 
  3.8136516773311377`*^9}},ExpressionUUID->"f0b9a4d6-bcd4-48f7-9312-\
c0514f50288c"],

Cell[CellGroupData[{

Cell["Overview", "Section",
 CellChangeTimes->{{3.814018860757616*^9, 
  3.8140188621077747`*^9}},ExpressionUUID->"4310ba37-7551-4d2a-a43b-\
1de62e5d9dda"],

Cell[TextData[{
 "This notebook analyses the eco-evolutionary dynamics of X-linked meiotic \
drive. \n\nIn this file, we assume that the birth rate declines linearly with \
population size. This assumption means that increased birth rates will \
increase the population size, which we expect to be generally true. Different \
assumptions about density-dependence may mean that increases in birth rate \
can actually decrease population size. We explore one such possibility in \
another Supplementary notebook. Further supplementary material contains \
python code used to conduct stochastic simulations of population size and \
persistence when there is X-linked meiotic drive. \n\nSince the spread of \
meiotic drive alleles may be affected the degree of polyandry via sperm \
competition, we investigate cases where females mate once (",
 Cell[BoxData[
  FormBox[
   RowBox[{
    SubscriptBox["\[Lambda]", "f"], "=", "1"}], TraditionalForm]],
  FormatType->"TraditionalForm",ExpressionUUID->
  "ea4cc969-b2d2-4458-82e2-93ec0ae56a0c"],
 "), twice (",
 Cell[BoxData[
  FormBox[
   RowBox[{
    SubscriptBox["\[Lambda]", "f"], "=", "2"}], TraditionalForm]],
  FormatType->"TraditionalForm",ExpressionUUID->
  "a9e0c51e-5318-4fa5-8bd7-f6f424049cc2"],
 "), or many times (",
 Cell[BoxData[
  FormBox[
   RowBox[{
    SubscriptBox["\[Lambda]", "f"], "\[Rule]", "\[Infinity]"}], 
   TraditionalForm]],
  FormatType->"TraditionalForm",ExpressionUUID->
  "f56877d5-7300-4f39-8dc2-bf574cd22701"],
 "), each of which is presented in a separate section. The first section \
(Common Notation and Substitutions), should be entered before evaluating any \
of these sections. "
}], "Text",
 CellChangeTimes->{{3.813655240250414*^9, 3.813655477749702*^9}, {
  3.813655517394024*^9, 3.813655929474389*^9}, {3.813928023019766*^9, 
  3.813928026347568*^9}, {3.814018820664456*^9, 3.814018843545726*^9}, {
  3.814018936514036*^9, 3.814018960689776*^9}, {3.8140920410257273`*^9, 
  3.814092050969368*^9}},ExpressionUUID->"49957b2d-c3fb-449d-9a2a-\
f23d490ae09c"]
}, Closed]],

Cell[CellGroupData[{

Cell["Common Notation and Substitutions [ENTER FIRST] ", "Section",
 CellChangeTimes->{{3.814018923386217*^9, 3.8140189329701023`*^9}, {
  3.814019466209839*^9, 
  3.8140194721274967`*^9}},ExpressionUUID->"ecb2965d-0ae6-4644-846b-\
a4438bf10635"],

Cell[TextData[{
 "We track adult (diploid) genotypes at an X linked locus that experiences \
meiotic drive in males. There are therefore 5 genotypes: 3 female genotypes \
and 2 male genotypes. In this notebook we use upper case D for the wildtype \
allele (which could also be called ",
 Cell[BoxData[
  FormBox[
   SubscriptBox["S", "t"], TraditionalForm]],
  FormatType->"TraditionalForm",ExpressionUUID->
  "f53f08b8-c8c0-435c-8de5-230bfe759d83"],
 " or ",
 Cell[BoxData[
  FormBox["X", TraditionalForm]],
  FormatType->"TraditionalForm",ExpressionUUID->
  "c19ad89e-3e7a-4f12-9b87-df63c4e9a53d"],
 ") and lower case d to give the meiotic drive allele (which could also be \
called ",
 Cell[BoxData[
  FormBox[
   SubscriptBox["S", "r"], TraditionalForm]],
  FormatType->"TraditionalForm",ExpressionUUID->
  "eb1bf42b-8c4e-4210-8af6-2517b35758cc"],
 " or ",
 Cell[BoxData[
  FormBox[
   SubscriptBox["X", "d"], TraditionalForm]],
  FormatType->"TraditionalForm",ExpressionUUID->
  "3b0239e2-6199-4506-95ac-3489558a9fce"],
 "). The 5 adult genotypes are therefore\nfemales:\n",
 Cell[BoxData[
  FormBox[
   SubscriptBox["S", "t"], TraditionalForm]],
  FormatType->"TraditionalForm",ExpressionUUID->
  "f8bffd34-98f6-4957-aea1-ab47a51cb6aa"],
 Cell[BoxData[
  FormBox[
   SubscriptBox["S", "t"], TraditionalForm]],
  FormatType->"TraditionalForm",ExpressionUUID->
  "5b409ad5-ce4b-4341-baff-ce64c7bf91c9"],
 " = ",
 Cell[BoxData[
  FormBox["X", TraditionalForm]],ExpressionUUID->
  "de1bdf2a-1743-4a84-aaf4-c68f30aaec73"],
 Cell[BoxData[
  FormBox["X", TraditionalForm]],ExpressionUUID->
  "8fb9ddf6-101f-42dd-921e-f1a7f460be25"],
 "= DDf\n",
 Cell[BoxData[
  FormBox[
   SubscriptBox["S", "r"], TraditionalForm]],
  FormatType->"TraditionalForm",ExpressionUUID->
  "6c914f89-983e-46ae-8f78-6c14642c0573"],
 Cell[BoxData[
  FormBox[
   SubscriptBox["S", "t"], TraditionalForm]],
  FormatType->"TraditionalForm",ExpressionUUID->
  "84638b1b-f1d1-49dc-bbe8-76a34fa923a1"],
 " = ",
 Cell[BoxData[
  FormBox[
   SubscriptBox["X", "d"], TraditionalForm]],ExpressionUUID->
  "ca1ad55f-bc21-4ba8-b09d-b820773d326f"],
 Cell[BoxData[
  FormBox["X", TraditionalForm]],ExpressionUUID->
  "ebbbe5e3-af83-428c-a314-0e882084065a"],
 " = Ddf\n",
 Cell[BoxData[
  FormBox[
   SubscriptBox["S", "r"], TraditionalForm]],
  FormatType->"TraditionalForm",ExpressionUUID->
  "f44b26a6-6782-4333-9f0d-14ed8f434e42"],
 Cell[BoxData[
  FormBox[
   SubscriptBox["S", "r"], TraditionalForm]],
  FormatType->"TraditionalForm",ExpressionUUID->
  "8419305f-35ec-4983-aa7f-a9e294302bd7"],
 " = ",
 Cell[BoxData[
  FormBox[
   SubscriptBox["X", "d"], TraditionalForm]],ExpressionUUID->
  "43e8627d-683d-4265-8abc-e93abbb5ad4d"],
 Cell[BoxData[
  FormBox[
   SubscriptBox["X", "d"], TraditionalForm]],ExpressionUUID->
  "081e7bb1-cdcf-4c8f-b563-2766b0cdef2b"],
 " = ddf\nmales:\n",
 Cell[BoxData[
  FormBox[
   SubscriptBox["S", "t"], TraditionalForm]],ExpressionUUID->
  "8be3796c-1662-49ca-a4ed-ec96184be421"],
 "Y = ",
 Cell[BoxData[
  FormBox["X", TraditionalForm]],ExpressionUUID->
  "618ad4d4-c302-43d4-9e6f-f2cd95858eae"],
 Cell[BoxData[
  FormBox["Y", TraditionalForm]],ExpressionUUID->
  "36c8f206-87e7-4bb2-9c09-f93c8db1cf01"],
 " = Dm\n",
 Cell[BoxData[
  FormBox[
   SubscriptBox["S", "r"], TraditionalForm]],ExpressionUUID->
  "a13b9d35-bcd3-4906-81b3-662b6cf04851"],
 "Y = ",
 Cell[BoxData[
  FormBox[
   SubscriptBox["X", "d"], TraditionalForm]],ExpressionUUID->
  "8d7bf35b-8b46-411d-91b3-824cc4a87a9b"],
 Cell[BoxData[
  FormBox["Y", TraditionalForm]],ExpressionUUID->
  "2568c88d-6f0e-4b62-af76-bd13551fe287"],
 " = dm\nsuch that\nijf is the density of females with genotype ij \nim is \
the density of males with genotype i"
}], "Text",
 CellChangeTimes->{{3.8140190605131702`*^9, 3.814019392288312*^9}, {
  3.8140757952060537`*^9, 3.8140758541839437`*^9}, {3.814077180589332*^9, 
  3.81407720443826*^9}, {3.81407730059503*^9, 
  3.814077315912006*^9}},ExpressionUUID->"bbf45c70-2c7b-4d53-8e72-\
65085059f88a"],

Cell[TextData[{
 "We assume that the X-linked meiotic drive allele biases transmission in \
males, such that a ",
 Cell[BoxData[
  RowBox[{"(", 
   FractionBox[
    RowBox[{"(", 
     RowBox[{"1", "+", "\[Delta]"}], ")"}], "2"], ")"}]],
  CellChangeTimes->{{3.7814428720012417`*^9, 3.781442894240843*^9}, {
   3.814008329923299*^9, 3.8140083738240767`*^9}, {3.814019442825118*^9, 
   3.814019443216568*^9}, {3.81401966596344*^9, 3.814019666468874*^9}, {
   3.81407591820485*^9, 3.814075935309269*^9}, {3.814075978592771*^9, 
   3.814075985638269*^9}, {3.814079326819665*^9, 3.8140793341532917`*^9}, {
   3.8140794393433743`*^9, 3.814079615488195*^9}, {3.8140796473810863`*^9, 
   3.8140798375136547`*^9}},ExpressionUUID->
  "cc635356-31e0-4484-b8e6-f706222a3908"],
 "fraction of gametes produced by a meiotic drive male (dm) carry the drive \
allele (d). Furthermore, we assume that the ejaculate size of meiotic drive \
males, relative to wildtype males, is c. "
}], "Text",
 CellChangeTimes->{{3.814080029254443*^9, 
  3.8140801640639563`*^9}},ExpressionUUID->"159b7ed4-0e7f-402a-a842-\
a76148633e12"],

Cell["\<\
We  use the following substitutions to convert between these genotype \
densities and the total density of males (maleNum) and females (femaleNum), \
and the frequency of the drive allele among males (pm) and females (pf), and \
the inbreeding coefficient (F). These quantities are defined by \
substitutionEquations, subeq can be used to convert from the genotype \
densities into male/female densities and allele frequencies. \
\>", "Text",
 CellChangeTimes->{{3.814077206472991*^9, 3.814077212502678*^9}, {
  3.814077289440152*^9, 3.814077399069392*^9}, {3.81407752412192*^9, 
  3.814077623571116*^9}},ExpressionUUID->"eecf2aaf-f731-49f3-bfda-\
0e917861cdd7"],

Cell[CellGroupData[{

Cell[BoxData[{
 RowBox[{
  RowBox[{"substitutionEquations", "=", 
   RowBox[{"{", "\[IndentingNewLine]", 
    RowBox[{
     RowBox[{"femaleNum", "==", 
      RowBox[{"DDf", "+", "Ddf", "+", "ddf"}]}], ",", "\[IndentingNewLine]", 
     RowBox[{"maleNum", "\[Equal]", 
      RowBox[{"(", 
       RowBox[{"dm", "+", "Dm"}], ")"}]}], ",", "\[IndentingNewLine]", 
     RowBox[{"pm", "==", 
      FractionBox["dm", 
       RowBox[{"dm", "+", "Dm"}]]}], ",", "\[IndentingNewLine]", 
     RowBox[{
      RowBox[{"(", 
       RowBox[{
        RowBox[{
         RowBox[{
          RowBox[{"(", 
           RowBox[{"1", "-", "pf"}], ")"}], "^", "2"}], 
         RowBox[{"(", 
          RowBox[{"1", "-", "F"}], ")"}]}], "+", 
        RowBox[{"F", 
         RowBox[{"(", 
          RowBox[{"1", "-", "pf"}], ")"}]}]}], ")"}], "==", 
      FractionBox["DDf", 
       RowBox[{"DDf", "+", "Ddf", "+", "ddf"}]]}], ",", "\[IndentingNewLine]", 
     RowBox[{
      RowBox[{"2", "pf", 
       RowBox[{"(", 
        RowBox[{"1", "-", "pf"}], ")"}], 
       RowBox[{"(", 
        RowBox[{"1", "-", "F"}], ")"}]}], "==", 
      FractionBox["Ddf", 
       RowBox[{"DDf", "+", "Ddf", "+", "ddf"}]]}], ",", "\[IndentingNewLine]", 
     RowBox[{
      RowBox[{
       RowBox[{
        RowBox[{
         RowBox[{"(", "pf", ")"}], "^", "2"}], 
        RowBox[{"(", 
         RowBox[{"1", "-", "F"}], ")"}]}], "+", 
       RowBox[{"F", " ", "pf"}]}], "==", 
      FractionBox["ddf", 
       RowBox[{"DDf", "+", "Ddf", "+", "ddf"}]]}]}], "\[IndentingNewLine]", 
    "}"}]}], ";"}], "\[IndentingNewLine]", 
 RowBox[{"subeq", "=", 
  RowBox[{"Simplify", "[", 
   RowBox[{"Solve", "[", 
    RowBox[{"substitutionEquations", ",", 
     RowBox[{"{", 
      RowBox[{"dm", ",", "Dm", ",", "DDf", ",", "Ddf", ",", "ddf"}], "}"}]}], 
    "]"}], "]"}]}]}], "Input",
 CellChangeTimes->{{3.814077223260071*^9, 3.8140772805761766`*^9}, {
  3.814077501177114*^9, 3.814077520478444*^9}},
 CellLabel->
  "In[1269]:=",ExpressionUUID->"933bbd05-fc28-431a-9273-1f317681a387"],

Cell[BoxData[
 RowBox[{"{", 
  RowBox[{"{", 
   RowBox[{
    RowBox[{"dm", "\[Rule]", 
     RowBox[{"maleNum", " ", "pm"}]}], ",", 
    RowBox[{"Dm", "\[Rule]", 
     RowBox[{"maleNum", "-", 
      RowBox[{"maleNum", " ", "pm"}]}]}], ",", 
    RowBox[{"DDf", "\[Rule]", 
     RowBox[{
      RowBox[{"-", "femaleNum"}], " ", 
      RowBox[{"(", 
       RowBox[{
        RowBox[{"-", "1"}], "+", "pf"}], ")"}], " ", 
      RowBox[{"(", 
       RowBox[{"1", "+", 
        RowBox[{
         RowBox[{"(", 
          RowBox[{
           RowBox[{"-", "1"}], "+", "F"}], ")"}], " ", "pf"}]}], ")"}]}]}], 
    ",", 
    RowBox[{"Ddf", "\[Rule]", 
     RowBox[{"2", " ", 
      RowBox[{"(", 
       RowBox[{
        RowBox[{"-", "1"}], "+", "F"}], ")"}], " ", "femaleNum", " ", 
      RowBox[{"(", 
       RowBox[{
        RowBox[{"-", "1"}], "+", "pf"}], ")"}], " ", "pf"}]}], ",", 
    RowBox[{"ddf", "\[Rule]", 
     RowBox[{"femaleNum", " ", "pf", " ", 
      RowBox[{"(", 
       RowBox[{"F", "+", "pf", "-", 
        RowBox[{"F", " ", "pf"}]}], ")"}]}]}]}], "}"}], "}"}]], "Output",
 CellChangeTimes->{{3.814077219052555*^9, 3.814077280927372*^9}, 
   3.814077589788096*^9, 3.814080197254603*^9, 3.814189384027315*^9, 
   3.814195950473256*^9, 3.8141965029755163`*^9},
 CellLabel->
  "Out[1270]=",ExpressionUUID->"16d45062-7510-4809-b453-50a35732a81e"]
}, Open  ]],

Cell["\<\
In the absence of any competition for resources, each female will survive to \
produce b surviving juveniles. Density dependence acts to reduce the survival \
of females to reproduction, survival of juveniles, and/or female fecundity \
(which are all modelled equivalently) by a factor of (1-\[Alpha] N) where N \
is the total density of males and females (maleNum+femaleNum). That is \
\[Alpha] is the per adult competitive effect on reproductive rate. totAdults \
gives the total population density of males and females. \
\>", "Text",
 CellChangeTimes->{{3.814078082733198*^9, 3.814078132242939*^9}, {
  3.814078167961803*^9, 3.814078323095675*^9}, {3.814078358488497*^9, 
  3.814078360367148*^9}, {3.814078400246647*^9, 3.81407846691296*^9}, {
  3.814078506703103*^9, 3.814078506939747*^9}, {3.814078603846031*^9, 
  3.8140786211249657`*^9}},ExpressionUUID->"6495c331-3979-4c05-ad07-\
e0a3df45f3ae"],

Cell[BoxData[
 RowBox[{
  RowBox[{"totAdults", " ", "=", " ", 
   RowBox[{
   "DDf", " ", "+", " ", "Ddf", " ", "+", " ", "ddf", " ", "+", " ", "Dm", 
    " ", "+", " ", "dm"}]}], ";"}]], "Input",
 CellLabel->
  "In[1271]:=",ExpressionUUID->"b8cdac10-be99-4143-9f4a-cbcfca14e837"],

Cell[TextData[{
 "Before juveniles reach adulthood, they experience selection according to \
their genotype. The relative fitness of different genotypes is given by\n",
 Cell[BoxData[
  FormBox[
   RowBox[{
    SubscriptBox["W", "XX"], "=", "1"}], TraditionalForm]],ExpressionUUID->
  "a77f4836-0e4d-4928-b7f2-d7e6ec7f207d"],
 "\n",
 Cell[BoxData[
  FormBox[
   RowBox[{
    SubscriptBox["W", 
     RowBox[{
      SubscriptBox["X", "d"], "X"}]], "=", 
    RowBox[{"1", "-", 
     RowBox[{"h", " ", "sf"}]}]}], TraditionalForm]],ExpressionUUID->
  "4561688b-357e-42bb-a620-375e399f8e16"],
 "\n",
 Cell[BoxData[
  FormBox[
   RowBox[{
    SubscriptBox["W", 
     RowBox[{
      SubscriptBox["X", "d"], 
      SubscriptBox["X", "d"]}]], "=", 
    RowBox[{"1", "-", "sf"}]}], TraditionalForm]],ExpressionUUID->
  "86946e7d-c0ba-433b-91d3-ff462383969c"],
 "\n",
 Cell[BoxData[
  FormBox[
   RowBox[{
    SubscriptBox["W", "XY"], "=", "1"}], TraditionalForm]],ExpressionUUID->
  "55c484f0-9132-4953-82b1-56540e9766f6"],
 "\n",
 Cell[BoxData[
  FormBox[
   RowBox[{
    SubscriptBox["W", 
     RowBox[{
      SubscriptBox["X", "d"], "Y"}]], "=", 
    RowBox[{"1", "-", "sm"}]}], TraditionalForm]],ExpressionUUID->
  "648095e2-ef28-4ed0-9797-f79c3b79c3a7"],
 "\nWe use ijfprime and imprime to specify the densities of each genotype \
after one generation (recursion/difference equations for change in genotype \
densities). For example, DDfprime is the density of females with genotype DD \
after one generation. "
}], "Text",
 CellChangeTimes->{{3.814078662208776*^9, 3.8140787408128223`*^9}, {
  3.81407914095951*^9, 3.814079300391842*^9}, {3.814080008982128*^9, 
  3.8140800183201637`*^9}},ExpressionUUID->"440e961e-4cff-444f-9479-\
667039b4eae6"]
}, Closed]],

Cell[CellGroupData[{

Cell[TextData[{
 "Allele Frequency and Population Size Dynamics - females mate with one male \
(",
 Cell[BoxData[
  FormBox[
   RowBox[{
    SubscriptBox["\[Lambda]", "f"], "=", "1"}], TraditionalForm]],
  FormatType->"TraditionalForm",ExpressionUUID->
  "31aa7438-73b4-4d17-92da-86a18422caea"],
 ")"
}], "Section",
 CellChangeTimes->{{3.781270219531413*^9, 3.78127022211313*^9}, {
  3.814005687940864*^9, 3.814005718641315*^9}, {3.814006090928898*^9, 
  3.814006091279448*^9}, {3.814018602075158*^9, 
  3.8140186161748466`*^9}},ExpressionUUID->"64106deb-c0a7-4c27-9d28-\
350dff73efe7"],

Cell[CellGroupData[{

Cell["Recursion equations", "Subsection",
 CellChangeTimes->{{3.781442815965227*^9, 
  3.7814428221797113`*^9}},ExpressionUUID->"39c0b246-04bf-4ac8-9a23-\
0d4f89147337"],

Cell[TextData[{
 "We consider each pairwise combination of male and female genotypes and the \
probability that each mating type produces each offspring genotype. We assume \
random mating so that each mating combination happens in proportion to the \
frequency of males with each genotype (e.g., ",
 Cell[BoxData[
  FractionBox["dm", 
   RowBox[{"(", 
    RowBox[{"Dm", "+", "dm"}], ")"}]]],
  CellChangeTimes->{{3.7814428720012417`*^9, 3.781442894240843*^9}, {
   3.814008329923299*^9, 3.8140083738240767`*^9}, {3.814019442825118*^9, 
   3.814019443216568*^9}, {3.81401966596344*^9, 3.814019666468874*^9}, {
   3.81407591820485*^9, 3.814075935309269*^9}, {3.814075978592771*^9, 
   3.814075985638269*^9}, {3.814079326819665*^9, 3.8140793341532917`*^9}, {
   3.8140794393433743`*^9, 3.814079615488195*^9}, {3.8140796473810863`*^9, 
   3.8140798375136547`*^9}},ExpressionUUID->
  "7e9fcc47-b6c8-474a-8d8d-364dde5ebf1a"],
 "is the frequency of drive males among males). These equations track all \
mating combinations that produce each juvenile genotype. The rate of birth \
and density-dependence competition (b*(1-\[Alpha] totAdults)) is not directly \
dependent on genotype. "
}], "Text",
 CellChangeTimes->{{3.781442917577629*^9, 3.7814429407924557`*^9}, {
  3.8140194969339123`*^9, 3.814019651741583*^9}, {3.814079370297378*^9, 
  3.814079448867035*^9}, {3.814079848942235*^9, 
  3.814079997046238*^9}},ExpressionUUID->"952fafe7-9bdc-4222-85bb-\
f6cec541a6e0"],

Cell[BoxData[{
 RowBox[{
  RowBox[{
   RowBox[{"DDfjuveniles", "=", 
    RowBox[{"b", "*", 
     RowBox[{"(", 
      RowBox[{"1", "-", 
       RowBox[{"\[Alpha]", " ", "totAdults"}]}], ")"}], 
     RowBox[{"(", 
      RowBox[{
       RowBox[{"DDf", "*", 
        FractionBox["Dm", 
         RowBox[{"(", 
          RowBox[{"Dm", "+", "dm"}], ")"}]], "*", 
        FractionBox["1", "2"]}], " ", "+", "\[IndentingNewLine]", 
       RowBox[{
        FractionBox["Ddf", "2"], "*", 
        FractionBox["Dm", 
         RowBox[{"(", 
          RowBox[{"Dm", "+", "dm"}], ")"}]], "*", 
        FractionBox["1", "2"]}]}], ")"}]}]}], ";"}], 
  "\[IndentingNewLine]"}], "\[IndentingNewLine]", 
 RowBox[{
  RowBox[{"Ddfjuveniles", "=", 
   RowBox[{"b", "*", 
    RowBox[{"(", 
     RowBox[{"1", "-", 
      RowBox[{"\[Alpha]", " ", "totAdults"}]}], ")"}], 
    RowBox[{"(", 
     RowBox[{
      RowBox[{"DDf", "*", 
       FractionBox["dm", 
        RowBox[{"(", 
         RowBox[{"Dm", "+", "dm"}], ")"}]], "*", 
       RowBox[{"(", 
        FractionBox[
         RowBox[{"(", 
          RowBox[{"1", "+", "\[Delta]"}], ")"}], "2"], ")"}]}], "+", 
      "\[IndentingNewLine]", 
      RowBox[{
       FractionBox["Ddf", "2"], 
       RowBox[{"(", 
        RowBox[{
         RowBox[{
          FractionBox["Dm", 
           RowBox[{"(", 
            RowBox[{"Dm", "+", "dm"}], ")"}]], "*", 
          FractionBox["1", "2"]}], "+", 
         RowBox[{
          FractionBox["dm", 
           RowBox[{"(", 
            RowBox[{"Dm", "+", "dm"}], ")"}]], "*", 
          RowBox[{"(", 
           FractionBox[
            RowBox[{"(", 
             RowBox[{"1", "+", "\[Delta]"}], ")"}], "2"], ")"}]}]}], ")"}]}], 
      "+", "\[IndentingNewLine]", 
      RowBox[{"ddf", "*", 
       FractionBox["Dm", 
        RowBox[{"(", 
         RowBox[{"Dm", "+", "dm"}], ")"}]], "*", 
       FractionBox["1", "2"]}]}], ")"}]}]}], ";"}], "\[IndentingNewLine]", 
 RowBox[{
  RowBox[{"ddfjuveniles", "=", 
   RowBox[{"b", "*", 
    RowBox[{"(", 
     RowBox[{"1", "-", 
      RowBox[{"\[Alpha]", " ", "totAdults"}]}], ")"}], 
    RowBox[{"(", 
     RowBox[{
      RowBox[{
       FractionBox["Ddf", "2"], "*", 
       FractionBox["dm", 
        RowBox[{"(", 
         RowBox[{"Dm", "+", "dm"}], ")"}]], "*", 
       RowBox[{"(", 
        FractionBox[
         RowBox[{"(", 
          RowBox[{"1", "+", "\[Delta]"}], ")"}], "2"], ")"}]}], "+", 
      "\[IndentingNewLine]", 
      RowBox[{"ddf", "*", 
       FractionBox["dm", 
        RowBox[{"(", 
         RowBox[{"Dm", "+", "dm"}], ")"}]], "*", 
       RowBox[{"(", 
        FractionBox[
         RowBox[{"(", 
          RowBox[{"1", "+", "\[Delta]"}], ")"}], "2"], ")"}]}]}], ")"}]}]}], 
  ";"}], "\[IndentingNewLine]", 
 RowBox[{
  RowBox[{
   RowBox[{"Dmjuveniles", "=", 
    RowBox[{"b", "*", 
     RowBox[{"(", 
      RowBox[{"1", "-", 
       RowBox[{"\[Alpha]", " ", "totAdults"}]}], ")"}], 
     RowBox[{"(", 
      RowBox[{
       RowBox[{"DDf", "*", 
        FractionBox["Dm", 
         RowBox[{"(", 
          RowBox[{"Dm", "+", "dm"}], ")"}]], "*", 
        FractionBox["1", "2"]}], "+", "\[IndentingNewLine]", 
       RowBox[{
        FractionBox["Ddf", "2"], "*", 
        RowBox[{"(", 
         RowBox[{
          RowBox[{
           FractionBox["Dm", 
            RowBox[{"(", 
             RowBox[{"Dm", "+", "dm"}], ")"}]], "*", 
           FractionBox["1", "2"]}], "+", 
          RowBox[{
           FractionBox["dm", 
            RowBox[{"(", 
             RowBox[{"Dm", "+", "dm"}], ")"}]], "*", 
           RowBox[{"(", 
            FractionBox[
             RowBox[{"(", 
              RowBox[{"1", "-", "\[Delta]"}], ")"}], "2"], ")"}]}]}], ")"}]}],
        "+", "\[IndentingNewLine]", 
       RowBox[{"DDf", "*", 
        FractionBox["dm", 
         RowBox[{"(", 
          RowBox[{"Dm", "+", "dm"}], ")"}]], "*", 
        RowBox[{"(", 
         FractionBox[
          RowBox[{"(", 
           RowBox[{"1", "-", "\[Delta]"}], ")"}], "2"], ")"}]}]}], ")"}]}]}], 
   ";"}], "\[IndentingNewLine]"}], "\[IndentingNewLine]", 
 RowBox[{
  RowBox[{"dmjuveniles", "=", 
   RowBox[{"b", "*", 
    RowBox[{"(", 
     RowBox[{"1", "-", 
      RowBox[{"\[Alpha]", " ", "totAdults"}]}], ")"}], 
    RowBox[{"(", 
     RowBox[{
      RowBox[{
       FractionBox["Ddf", "2"], "*", 
       RowBox[{"(", 
        RowBox[{
         RowBox[{
          FractionBox["dm", 
           RowBox[{"(", 
            RowBox[{"Dm", "+", "dm"}], ")"}]], "*", 
          RowBox[{"(", 
           FractionBox[
            RowBox[{"(", 
             RowBox[{"1", "-", "\[Delta]"}], ")"}], "2"], ")"}]}], "+", 
         RowBox[{
          FractionBox["Dm", 
           RowBox[{"(", 
            RowBox[{"Dm", "+", "dm"}], ")"}]], "*", 
          FractionBox["1", "2"]}]}], ")"}]}], "+", "\[IndentingNewLine]", 
      RowBox[{"ddf", "*", 
       RowBox[{"(", 
        RowBox[{
         RowBox[{
          FractionBox["Dm", 
           RowBox[{"(", 
            RowBox[{"Dm", "+", "dm"}], ")"}]], 
          FractionBox["1", "2"]}], "+", 
         RowBox[{
          FractionBox["dm", 
           RowBox[{"(", 
            RowBox[{"Dm", "+", "dm"}], ")"}]], "*", 
          RowBox[{"(", 
           FractionBox[
            RowBox[{"(", 
             RowBox[{"1", "-", "\[Delta]"}], ")"}], "2"], ")"}]}]}], 
        ")"}]}]}], ")"}]}]}], ";"}]}], "Input",
 CellChangeTimes->{{3.7814428720012417`*^9, 3.781442894240843*^9}, {
  3.814008329923299*^9, 3.8140083738240767`*^9}, {3.814019442825118*^9, 
  3.814019443216568*^9}, {3.81401966596344*^9, 3.814019666468874*^9}, {
  3.81407591820485*^9, 3.814075935309269*^9}, {3.814075978592771*^9, 
  3.814075985638269*^9}, {3.814079326819665*^9, 3.8140793341532917`*^9}, {
  3.8140794393433743`*^9, 3.814079615488195*^9}, {3.8140796473810863`*^9, 
  3.8140798375136547`*^9}},
 CellLabel->
  "In[1272]:=",ExpressionUUID->"c7291398-a127-4761-862e-ec5f4fc0601c"],

Cell["\<\
Before the next generation of adults, viability selection acts according to \
genotype. \
\>", "Text",
 CellChangeTimes->{{3.814019703490279*^9, 3.814019713199089*^9}, {
  3.814080207173728*^9, 
  3.8140802231575623`*^9}},ExpressionUUID->"3b8c5c61-7339-4028-8e8d-\
7a59c34f43d9"],

Cell[BoxData[{
 RowBox[{
  RowBox[{"DDfprime", "=", 
   RowBox[{"DDfjuveniles", " ", "*", " ", "1"}]}], 
  ";"}], "\[IndentingNewLine]", 
 RowBox[{
  RowBox[{"Ddfprime", "=", 
   RowBox[{"Ddfjuveniles", "*", 
    RowBox[{"(", 
     RowBox[{"1", " ", "-", " ", 
      RowBox[{"h", "*", "sf"}]}], ")"}]}]}], ";"}], "\[IndentingNewLine]", 
 RowBox[{
  RowBox[{"ddfprime", "=", 
   RowBox[{"ddfjuveniles", "*", 
    RowBox[{"(", 
     RowBox[{"1", " ", "-", " ", "sf"}], ")"}]}]}], 
  ";"}], "\[IndentingNewLine]", 
 RowBox[{
  RowBox[{"Dmprime", "=", 
   RowBox[{"Dmjuveniles", "*", "1"}]}], ";"}], "\[IndentingNewLine]", 
 RowBox[{
  RowBox[{"dmprime", "=", 
   RowBox[{"dmjuveniles", "*", 
    RowBox[{"(", 
     RowBox[{"1", " ", "-", " ", "sm"}], ")"}]}]}], ";"}]}], "Input",
 CellChangeTimes->{{3.814078581020732*^9, 3.8140785877471237`*^9}, {
  3.814080227714635*^9, 3.814080242013699*^9}},
 CellLabel->
  "In[1277]:=",ExpressionUUID->"3c17a47e-acfe-4409-983e-0716addff0f1"]
}, Closed]],

Cell[CellGroupData[{

Cell["Equilibrium allele frequency and population size", "Subsection",
 CellChangeTimes->{{3.781270227876593*^9, 
  3.781270234977231*^9}},ExpressionUUID->"6cec54af-8f67-495d-ae4b-\
902b41bf33b2"],

Cell["\<\
We first look at only the difference in allele frequency and inbreeding \
coefficient to calculate the polymorphic allele frequency equilibrium (when \
changes in allele frequency and inbreeding coefficient are 0)\
\>", "Text",
 CellChangeTimes->{{3.781444079790472*^9, 3.781444104553514*^9}, {
  3.781457247488077*^9, 3.781457276171872*^9}, {3.781887727883533*^9, 
  3.781887728058511*^9}, {3.81408030548451*^9, 
  3.8140803701820793`*^9}},ExpressionUUID->"73ee4ad7-1b79-49e0-94b4-\
98acb39dd9bd"],

Cell[CellGroupData[{

Cell[BoxData[{
 RowBox[{
  RowBox[{"solveme", "=", 
   RowBox[{"Simplify", "[", 
    RowBox[{
     RowBox[{"{", 
      RowBox[{
       RowBox[{
        RowBox[{"(", 
         FractionBox["dmprime", 
          RowBox[{"Dmprime", "+", "dmprime"}]], ")"}], "-", 
        FractionBox["dm", 
         RowBox[{"dm", "+", "Dm"}]]}], ",", 
       RowBox[{
        RowBox[{"(", 
         FractionBox[
          RowBox[{
           RowBox[{"2", " ", "ddfprime"}], "+", "Ddfprime"}], 
          RowBox[{"2", " ", 
           RowBox[{"(", 
            RowBox[{"ddfprime", "+", "Ddfprime", "+", "DDfprime"}], ")"}]}]], 
         ")"}], "-", 
        FractionBox[
         RowBox[{
          RowBox[{"2", " ", "ddf"}], "+", "Ddf"}], 
         RowBox[{"2", " ", 
          RowBox[{"(", 
           RowBox[{"ddf", "+", "Ddf", "+", "DDf"}], ")"}]}]]}], ",", 
       RowBox[{
        RowBox[{"(", 
         FractionBox[
          RowBox[{
           RowBox[{"4", " ", "ddfprime", " ", "DDfprime"}], " ", "-", 
           SuperscriptBox["Ddfprime", "2"]}], 
          RowBox[{
           RowBox[{"(", 
            RowBox[{
             RowBox[{"2", " ", "ddfprime"}], "+", "Ddfprime"}], ")"}], " ", 
           RowBox[{"(", 
            RowBox[{"Ddfprime", "+", 
             RowBox[{"2", " ", "DDfprime"}]}], ")"}]}]], ")"}], "-", 
        FractionBox[
         RowBox[{
          RowBox[{"4", " ", "ddf", " ", "DDf"}], "-", 
          SuperscriptBox["Ddf", "2"]}], 
         RowBox[{
          RowBox[{"(", 
           RowBox[{
            RowBox[{"2", " ", "ddf"}], "+", "Ddf"}], ")"}], " ", 
          RowBox[{"(", 
           RowBox[{"Ddf", "+", 
            RowBox[{"2", " ", "DDf"}]}], ")"}]}]]}]}], "}"}], "/.", "subeq"}],
     "]"}]}], ";"}], "\[IndentingNewLine]", 
 RowBox[{"equilibrium", "=", 
  RowBox[{
   RowBox[{"Solve", "[", 
    RowBox[{
     RowBox[{
      RowBox[{"solveme", "[", 
       RowBox[{"[", "1", "]"}], "]"}], "\[Equal]", 
      RowBox[{"{", 
       RowBox[{"0", ",", "0", ",", "0"}], "}"}]}], ",", 
     RowBox[{"{", 
      RowBox[{"pm", ",", "pf", ",", "F"}], "}"}]}], "]"}], "//", 
   "Simplify"}]}]}], "Input",
 CellChangeTimes->{{3.7814440517009563`*^9, 3.7814440553262253`*^9}, {
  3.781444152654667*^9, 3.781444154007221*^9}, {3.781457230234502*^9, 
  3.781457236246904*^9}, {3.7814572809999943`*^9, 3.7814573029327593`*^9}, {
  3.781871249129278*^9, 3.781871260774413*^9}, {3.781884886553536*^9, 
  3.7818848877054157`*^9}, {3.8140084592127047`*^9, 3.81400845966019*^9}, {
  3.8140802649485693`*^9, 3.814080283706593*^9}},
 CellLabel->
  "In[1282]:=",ExpressionUUID->"de30a10f-65b2-4f17-9a3d-9934a3ef9d10"],

Cell[BoxData[
 RowBox[{"{", 
  RowBox[{"{", 
   RowBox[{
    RowBox[{"pm", "\[Rule]", 
     FractionBox[
      RowBox[{
       RowBox[{"(", 
        RowBox[{
         RowBox[{"-", "1"}], "+", "sm"}], ")"}], " ", 
       RowBox[{"(", 
        RowBox[{"\[Delta]", "-", 
         RowBox[{"sm", " ", 
          RowBox[{"(", 
           RowBox[{"1", "+", "\[Delta]"}], ")"}]}], "+", 
         RowBox[{"h", " ", "sf", " ", 
          RowBox[{"(", 
           RowBox[{
            RowBox[{"-", "2"}], "+", "sm", "-", "\[Delta]", "+", 
            RowBox[{"sm", " ", "\[Delta]"}]}], ")"}]}]}], ")"}]}], 
      RowBox[{
       RowBox[{"2", " ", "sf", " ", 
        RowBox[{"(", 
         RowBox[{
          RowBox[{"-", "1"}], "+", "sm"}], ")"}], " ", 
        RowBox[{"(", 
         RowBox[{"1", "+", "\[Delta]"}], ")"}]}], "+", 
       RowBox[{"h", " ", "sf", " ", 
        RowBox[{"(", 
         RowBox[{
          RowBox[{"-", "2"}], "+", "sm"}], ")"}], " ", 
        RowBox[{"(", 
         RowBox[{
          RowBox[{"-", "2"}], "+", "sm", "-", "\[Delta]", "+", 
          RowBox[{"sm", " ", "\[Delta]"}]}], ")"}]}], "-", 
       RowBox[{"sm", " ", 
        RowBox[{"(", 
         RowBox[{"sm", "-", "\[Delta]", "+", 
          RowBox[{"sm", " ", "\[Delta]"}]}], ")"}]}]}]]}], ",", 
    RowBox[{"pf", "\[Rule]", 
     FractionBox[
      RowBox[{"\[Delta]", "-", 
       RowBox[{"sm", " ", 
        RowBox[{"(", 
         RowBox[{"1", "+", "\[Delta]"}], ")"}]}], "+", 
       RowBox[{"h", " ", "sf", " ", 
        RowBox[{"(", 
         RowBox[{
          RowBox[{"-", "2"}], "+", "sm", "-", "\[Delta]", "+", 
          RowBox[{"sm", " ", "\[Delta]"}]}], ")"}]}]}], 
      RowBox[{"2", " ", "sf", " ", 
       RowBox[{"(", 
        RowBox[{
         RowBox[{
          RowBox[{"-", 
           RowBox[{"(", 
            RowBox[{
             RowBox[{"-", "1"}], "+", "sm"}], ")"}]}], " ", 
          RowBox[{"(", 
           RowBox[{"1", "+", "\[Delta]"}], ")"}]}], "+", 
         RowBox[{"h", " ", 
          RowBox[{"(", 
           RowBox[{
            RowBox[{"-", "2"}], "+", "sm", "-", "\[Delta]", "+", 
            RowBox[{"sm", " ", "\[Delta]"}]}], ")"}]}]}], ")"}]}]]}], ",", 
    RowBox[{"F", "\[Rule]", 
     RowBox[{"-", 
      FractionBox[
       RowBox[{
        RowBox[{
         RowBox[{"-", "2"}], " ", "h", " ", 
         SuperscriptBox["sf", "2"], " ", 
         RowBox[{"(", 
          RowBox[{
           RowBox[{"-", "1"}], "+", "sm"}], ")"}], " ", 
         RowBox[{"(", 
          RowBox[{"1", "+", "\[Delta]"}], ")"}], " ", 
         RowBox[{"(", 
          RowBox[{
           RowBox[{"-", "2"}], "+", "sm", "-", "\[Delta]", "+", 
           RowBox[{"sm", " ", "\[Delta]"}]}], ")"}]}], "+", 
        RowBox[{
         SuperscriptBox["h", "2"], " ", 
         SuperscriptBox["sf", "2"], " ", 
         SuperscriptBox[
          RowBox[{"(", 
           RowBox[{
            RowBox[{"-", "2"}], "+", "sm", "-", "\[Delta]", "+", 
            RowBox[{"sm", " ", "\[Delta]"}]}], ")"}], "2"]}], "+", 
        RowBox[{
         RowBox[{"(", 
          RowBox[{"sm", "-", "\[Delta]", "+", 
           RowBox[{"sm", " ", "\[Delta]"}]}], ")"}], " ", 
         RowBox[{"(", 
          RowBox[{"\[Delta]", "+", 
           RowBox[{"2", " ", "sf", " ", 
            RowBox[{"(", 
             RowBox[{
              RowBox[{"-", "1"}], "+", "sm"}], ")"}], " ", 
            RowBox[{"(", 
             RowBox[{"1", "+", "\[Delta]"}], ")"}]}], "-", 
           RowBox[{"sm", " ", 
            RowBox[{"(", 
             RowBox[{"1", "+", "\[Delta]"}], ")"}]}]}], ")"}]}]}], 
       RowBox[{
        RowBox[{
         SuperscriptBox["h", "2"], " ", 
         SuperscriptBox["sf", "2"], " ", 
         SuperscriptBox[
          RowBox[{"(", 
           RowBox[{
            RowBox[{"-", "2"}], "+", "sm", "-", "\[Delta]", "+", 
            RowBox[{"sm", " ", "\[Delta]"}]}], ")"}], "2"]}], "+", 
        SuperscriptBox[
         RowBox[{"(", 
          RowBox[{"sm", "-", "\[Delta]", "+", 
           RowBox[{"sm", " ", "\[Delta]"}]}], ")"}], "2"], "-", 
        RowBox[{"2", " ", "sf", " ", 
         RowBox[{"(", 
          RowBox[{
           RowBox[{"2", " ", 
            RowBox[{"(", 
             RowBox[{
              RowBox[{"-", "1"}], "+", "sm"}], ")"}], " ", 
            RowBox[{"(", 
             RowBox[{"1", "+", "\[Delta]"}], ")"}]}], "+", 
           RowBox[{"h", " ", 
            SuperscriptBox[
             RowBox[{"(", 
              RowBox[{
               RowBox[{"-", "2"}], "+", "sm", "-", "\[Delta]", "+", 
               RowBox[{"sm", " ", "\[Delta]"}]}], ")"}], "2"]}]}], 
          ")"}]}]}]]}]}]}], "}"}], "}"}]], "Output",
 CellChangeTimes->{{3.781457286264279*^9, 3.781457329190282*^9}, {
   3.781871254806685*^9, 3.781871262324274*^9}, {3.781884895727561*^9, 
   3.7818849162745123`*^9}, 3.7818880903011427`*^9, 3.781952829551042*^9, 
   3.7819529052636023`*^9, 3.781953902827918*^9, 3.781953937303303*^9, 
   3.782130661513627*^9, 3.783078902950335*^9, 3.7851523839197206`*^9, 
   3.78516271606812*^9, 3.785164947308786*^9, 3.78516498428473*^9, 
   3.7855724309572067`*^9, 3.7855883933616667`*^9, 3.789732675249082*^9, 
   3.790078582641345*^9, 3.795174667458596*^9, 3.799753840262821*^9, 
   3.800007967624103*^9, 3.800268193924336*^9, 3.813928086895986*^9, 
   3.813928138768917*^9, 3.814007922595193*^9, 3.8140189041365137`*^9, 
   3.814019740940907*^9, 3.814080287792897*^9, 3.814189390123685*^9, 
   3.8141959553591633`*^9, 3.814196505062763*^9},
 CellLabel->
  "Out[1283]=",ExpressionUUID->"12fdd420-b47c-4fea-b67f-734a62e0777f"]
}, Open  ]],

Cell["The full system is described by", "Text",
 CellChangeTimes->{{3.781459868655086*^9, 3.781459873390123*^9}, {
  3.814080376144492*^9, 
  3.814080390555254*^9}},ExpressionUUID->"eb65e4ed-19e0-45dc-8f5c-\
864c8f1c51d6"],

Cell[BoxData[
 RowBox[{
  RowBox[{"solvemeFull", "=", 
   RowBox[{
    RowBox[{
     RowBox[{"{", 
      RowBox[{
       RowBox[{"DDfprime", "-", "DDf"}], ",", 
       RowBox[{"Ddfprime", "-", "Ddf"}], ",", 
       RowBox[{"ddfprime", "-", "ddf"}], ",", " ", 
       RowBox[{"Dmprime", "-", "Dm"}], ",", " ", 
       RowBox[{"dmprime", "-", "dm"}]}], "}"}], "/.", 
     RowBox[{"subeq", "[", 
      RowBox[{"[", "1", "]"}], "]"}]}], "//", "Simplify"}]}], ";"}]], "Input",
 CellChangeTimes->{{3.781460135237193*^9, 3.7814601398015003`*^9}},
 CellLabel->
  "In[1284]:=",ExpressionUUID->"c3fd749e-7bec-4cdf-8c2a-e20d7b5d47c5"],

Cell["\<\
We can then solve for the population sizes. First we find population sizes \
when drive alleles are absent (pm=pf=0) or fixed (pm=pf=1):\
\>", "Text",
 CellChangeTimes->{{3.781459884674746*^9, 3.7814598986599483`*^9}, {
  3.7814599811143436`*^9, 3.781460009186688*^9}, {3.814081251018674*^9, 
  3.8140813011507196`*^9}},ExpressionUUID->"5d4314a8-b012-4d04-b525-\
0aad925df173"],

Cell[CellGroupData[{

Cell[BoxData[{
 RowBox[{"noDrivePopSizeSol", "=", 
  RowBox[{
   RowBox[{"Solve", "[", 
    RowBox[{
     RowBox[{
      RowBox[{"(", 
       RowBox[{
        RowBox[{"solvemeFull", "/.", 
         RowBox[{"pm", "\[Rule]", "0"}]}], "/.", 
        RowBox[{"pf", "\[Rule]", "0"}]}], ")"}], "\[Equal]", 
      RowBox[{"{", 
       RowBox[{"0", ",", "0", ",", "0", ",", "0", ",", "0"}], "}"}]}], ",", 
     RowBox[{"{", 
      RowBox[{"maleNum", ",", "femaleNum"}], "}"}]}], "]"}], "[", 
   RowBox[{"[", "2", "]"}], "]"}]}], "\[IndentingNewLine]", 
 RowBox[{"fixedDrivePopSizeSol", " ", "=", " ", 
  RowBox[{
   RowBox[{
    RowBox[{"Solve", "[", 
     RowBox[{
      RowBox[{
       RowBox[{"(", 
        RowBox[{
         RowBox[{"solvemeFull", "/.", 
          RowBox[{"pm", "\[Rule]", "1"}]}], "/.", 
         RowBox[{"pf", "\[Rule]", "1"}]}], ")"}], "\[Equal]", 
       RowBox[{"{", 
        RowBox[{"0", ",", "0", ",", "0", ",", "0", ",", "0"}], "}"}]}], ",", 
      RowBox[{"{", 
       RowBox[{"maleNum", ",", "femaleNum"}], "}"}]}], "]"}], "[", 
    RowBox[{"[", "2", "]"}], "]"}], "//", 
   "Simplify"}]}], "\[IndentingNewLine]", 
 RowBox[{"NnoDrive", "=", 
  RowBox[{
   RowBox[{
    RowBox[{"(", 
     RowBox[{"maleNum", " ", "+", " ", "femaleNum"}], ")"}], "/.", 
    "noDrivePopSizeSol"}], "//", "FullSimplify"}]}], "\[IndentingNewLine]", 
 RowBox[{"Nfixed", " ", "=", " ", 
  RowBox[{
   RowBox[{
    RowBox[{"(", 
     RowBox[{"maleNum", " ", "+", " ", "femaleNum"}], ")"}], "/.", 
    "fixedDrivePopSizeSol"}], "//", "FullSimplify"}]}]}], "Input",
 CellChangeTimes->{{3.781460025346209*^9, 3.78146009015233*^9}, {
   3.7818886806627913`*^9, 3.781888696789563*^9}, {3.7851524020108128`*^9, 
   3.785152402131963*^9}, {3.785152987803329*^9, 3.78515307352833*^9}, 
   3.785153145067387*^9, {3.7851560785368853`*^9, 3.7851560869155483`*^9}, {
   3.7851567369931593`*^9, 3.7851567962332497`*^9}, {3.785246487946137*^9, 
   3.785246499036151*^9}, 3.800008009183523*^9, {3.813928108083933*^9, 
   3.813928108539372*^9}, {3.814008467638185*^9, 3.814008471911174*^9}, {
   3.8140804965358553`*^9, 3.814080500635491*^9}},
 CellLabel->
  "In[1285]:=",ExpressionUUID->"b95805b1-e618-48a4-86f1-166d4a8e9edf"],

Cell[BoxData[
 RowBox[{"{", 
  RowBox[{
   RowBox[{"maleNum", "\[Rule]", 
    FractionBox[
     RowBox[{
      RowBox[{"-", "2"}], "+", "b"}], 
     RowBox[{"2", " ", "b", " ", "\[Alpha]"}]]}], ",", 
   RowBox[{"femaleNum", "\[Rule]", 
    FractionBox[
     RowBox[{
      RowBox[{"-", "2"}], "+", "b"}], 
     RowBox[{"2", " ", "b", " ", "\[Alpha]"}]]}]}], "}"}]], "Output",
 CellChangeTimes->{
  3.781459915238161*^9, {3.7814600290773687`*^9, 3.781460090503332*^9}, 
   3.781884923662936*^9, 3.781888113508231*^9, {3.781888685197915*^9, 
   3.781888700731204*^9}, 3.781952829895693*^9, 3.781952905640814*^9, 
   3.781953903117161*^9, 3.78195393756216*^9, 3.782130661789319*^9, 
   3.783078903509358*^9, 3.785152384536742*^9, 3.785152417953383*^9, 
   3.7851529881784067`*^9, {3.785153018743541*^9, 3.7851530741198397`*^9}, 
   3.7851531453647327`*^9, 3.7851560876389647`*^9, {3.785156737317646*^9, 
   3.785156796838706*^9}, 3.785162716671402*^9, 3.785164795842664*^9, 
   3.785164948200588*^9, 3.785164984849872*^9, {3.78524649041514*^9, 
   3.785246500246359*^9}, 3.785572431461936*^9, 3.785588394012405*^9, 
   3.78973267580768*^9, 3.7900785834664507`*^9, 3.795174667946147*^9, 
   3.799753840607267*^9, 3.799753999535042*^9, 3.8000079682202597`*^9, 
   3.800268194300805*^9, {3.8139280872828007`*^9, 3.813928108980541*^9}, 
   3.8139281390629587`*^9, 3.814019762371874*^9, 3.814080397313016*^9, 
   3.814080501865264*^9, 3.814189390336687*^9, 3.814195955528944*^9, 
   3.814196505260497*^9},
 CellLabel->
  "Out[1285]=",ExpressionUUID->"7eea0df3-e312-4ff9-9003-fab15e21f3e1"],

Cell[BoxData[
 RowBox[{"{", 
  RowBox[{
   RowBox[{"maleNum", "\[Rule]", 
    RowBox[{"-", 
     FractionBox[
      RowBox[{
       RowBox[{"(", 
        RowBox[{
         RowBox[{"-", "1"}], "+", "sm"}], ")"}], " ", 
       RowBox[{"(", 
        RowBox[{
         RowBox[{"-", "1"}], "+", "\[Delta]"}], ")"}], " ", 
       RowBox[{"(", 
        RowBox[{"2", "+", 
         RowBox[{"b", " ", 
          RowBox[{"(", 
           RowBox[{
            RowBox[{"-", "1"}], "+", "sf"}], ")"}], " ", 
          RowBox[{"(", 
           RowBox[{"1", "+", "\[Delta]"}], ")"}]}]}], ")"}]}], 
      RowBox[{"b", " ", 
       RowBox[{"(", 
        RowBox[{
         RowBox[{"-", "1"}], "+", "sf"}], ")"}], " ", "\[Alpha]", " ", 
       RowBox[{"(", 
        RowBox[{"1", "+", "\[Delta]"}], ")"}], " ", 
       RowBox[{"(", 
        RowBox[{
         RowBox[{"-", "2"}], "+", "sf", "+", "sm", "+", 
         RowBox[{"sf", " ", "\[Delta]"}], "-", 
         RowBox[{"sm", " ", "\[Delta]"}]}], ")"}]}]]}]}], ",", 
   RowBox[{"femaleNum", "\[Rule]", 
    FractionBox[
     RowBox[{"2", "+", 
      RowBox[{"b", " ", 
       RowBox[{"(", 
        RowBox[{
         RowBox[{"-", "1"}], "+", "sf"}], ")"}], " ", 
       RowBox[{"(", 
        RowBox[{"1", "+", "\[Delta]"}], ")"}]}]}], 
     RowBox[{"b", " ", "\[Alpha]", " ", 
      RowBox[{"(", 
       RowBox[{
        RowBox[{"-", "2"}], "+", "sf", "+", "sm", "+", 
        RowBox[{"sf", " ", "\[Delta]"}], "-", 
        RowBox[{"sm", " ", "\[Delta]"}]}], ")"}]}]]}]}], "}"}]], "Output",
 CellChangeTimes->{
  3.781459915238161*^9, {3.7814600290773687`*^9, 3.781460090503332*^9}, 
   3.781884923662936*^9, 3.781888113508231*^9, {3.781888685197915*^9, 
   3.781888700731204*^9}, 3.781952829895693*^9, 3.781952905640814*^9, 
   3.781953903117161*^9, 3.78195393756216*^9, 3.782130661789319*^9, 
   3.783078903509358*^9, 3.785152384536742*^9, 3.785152417953383*^9, 
   3.7851529881784067`*^9, {3.785153018743541*^9, 3.7851530741198397`*^9}, 
   3.7851531453647327`*^9, 3.7851560876389647`*^9, {3.785156737317646*^9, 
   3.785156796838706*^9}, 3.785162716671402*^9, 3.785164795842664*^9, 
   3.785164948200588*^9, 3.785164984849872*^9, {3.78524649041514*^9, 
   3.785246500246359*^9}, 3.785572431461936*^9, 3.785588394012405*^9, 
   3.78973267580768*^9, 3.7900785834664507`*^9, 3.795174667946147*^9, 
   3.799753840607267*^9, 3.799753999535042*^9, 3.8000079682202597`*^9, 
   3.800268194300805*^9, {3.8139280872828007`*^9, 3.813928108980541*^9}, 
   3.8139281390629587`*^9, 3.814019762371874*^9, 3.814080397313016*^9, 
   3.814080501865264*^9, 3.814189390336687*^9, 3.814195955528944*^9, 
   3.814196505297574*^9},
 CellLabel->
  "Out[1286]=",ExpressionUUID->"d14df597-d291-4b5b-940a-27a3b5d1a11d"],

Cell[BoxData[
 FractionBox[
  RowBox[{
   RowBox[{"-", "2"}], "+", "b"}], 
  RowBox[{"b", " ", "\[Alpha]"}]]], "Output",
 CellChangeTimes->{
  3.781459915238161*^9, {3.7814600290773687`*^9, 3.781460090503332*^9}, 
   3.781884923662936*^9, 3.781888113508231*^9, {3.781888685197915*^9, 
   3.781888700731204*^9}, 3.781952829895693*^9, 3.781952905640814*^9, 
   3.781953903117161*^9, 3.78195393756216*^9, 3.782130661789319*^9, 
   3.783078903509358*^9, 3.785152384536742*^9, 3.785152417953383*^9, 
   3.7851529881784067`*^9, {3.785153018743541*^9, 3.7851530741198397`*^9}, 
   3.7851531453647327`*^9, 3.7851560876389647`*^9, {3.785156737317646*^9, 
   3.785156796838706*^9}, 3.785162716671402*^9, 3.785164795842664*^9, 
   3.785164948200588*^9, 3.785164984849872*^9, {3.78524649041514*^9, 
   3.785246500246359*^9}, 3.785572431461936*^9, 3.785588394012405*^9, 
   3.78973267580768*^9, 3.7900785834664507`*^9, 3.795174667946147*^9, 
   3.799753840607267*^9, 3.799753999535042*^9, 3.8000079682202597`*^9, 
   3.800268194300805*^9, {3.8139280872828007`*^9, 3.813928108980541*^9}, 
   3.8139281390629587`*^9, 3.814019762371874*^9, 3.814080397313016*^9, 
   3.814080501865264*^9, 3.814189390336687*^9, 3.814195955528944*^9, 
   3.8141965052985153`*^9},
 CellLabel->
  "Out[1287]=",ExpressionUUID->"f3698d69-2c83-45f0-823e-0e01b1544ba1"],

Cell[BoxData[
 FractionBox[
  RowBox[{"1", "+", 
   FractionBox["2", 
    RowBox[{"b", " ", 
     RowBox[{"(", 
      RowBox[{
       RowBox[{"-", "1"}], "+", "sf"}], ")"}], " ", 
     RowBox[{"(", 
      RowBox[{"1", "+", "\[Delta]"}], ")"}]}]]}], "\[Alpha]"]], "Output",
 CellChangeTimes->{
  3.781459915238161*^9, {3.7814600290773687`*^9, 3.781460090503332*^9}, 
   3.781884923662936*^9, 3.781888113508231*^9, {3.781888685197915*^9, 
   3.781888700731204*^9}, 3.781952829895693*^9, 3.781952905640814*^9, 
   3.781953903117161*^9, 3.78195393756216*^9, 3.782130661789319*^9, 
   3.783078903509358*^9, 3.785152384536742*^9, 3.785152417953383*^9, 
   3.7851529881784067`*^9, {3.785153018743541*^9, 3.7851530741198397`*^9}, 
   3.7851531453647327`*^9, 3.7851560876389647`*^9, {3.785156737317646*^9, 
   3.785156796838706*^9}, 3.785162716671402*^9, 3.785164795842664*^9, 
   3.785164948200588*^9, 3.785164984849872*^9, {3.78524649041514*^9, 
   3.785246500246359*^9}, 3.785572431461936*^9, 3.785588394012405*^9, 
   3.78973267580768*^9, 3.7900785834664507`*^9, 3.795174667946147*^9, 
   3.799753840607267*^9, 3.799753999535042*^9, 3.8000079682202597`*^9, 
   3.800268194300805*^9, {3.8139280872828007`*^9, 3.813928108980541*^9}, 
   3.8139281390629587`*^9, 3.814019762371874*^9, 3.814080397313016*^9, 
   3.814080501865264*^9, 3.814189390336687*^9, 3.814195955528944*^9, 
   3.8141965053440847`*^9},
 CellLabel->
  "Out[1288]=",ExpressionUUID->"1b762892-0378-4e0c-b8d4-7449844f0bb0"]
}, Open  ]],

Cell["\<\
Now for the case where a polymorphic equilibrium has been reached\
\>", "Text",
 CellChangeTimes->{{3.781460153288809*^9, 
  3.7814601650929117`*^9}},ExpressionUUID->"a2ebe6e0-9a3a-4805-9370-\
fa17194a141a"],

Cell[CellGroupData[{

Cell[BoxData[{
 RowBox[{
  RowBox[{"simpleSolvemeFull", "=", 
   RowBox[{"Simplify", "[", 
    RowBox[{"(", "solvemeFull", ")"}], "]"}]}], ";"}], "\[IndentingNewLine]", 
 RowBox[{"equilPopSizeSol", "=", 
  RowBox[{"Simplify", "[", 
   RowBox[{"Solve", "[", 
    RowBox[{
     RowBox[{
      RowBox[{"Flatten", "[", 
       RowBox[{"Simplify", "[", 
        RowBox[{"(", 
         RowBox[{"simpleSolvemeFull", "/.", "equilibrium"}], ")"}], "]"}], 
       "]"}], "\[Equal]", 
      RowBox[{"{", 
       RowBox[{"0", ",", "0", ",", "0", ",", "0", ",", "0"}], "}"}]}], ",", 
     " ", 
     RowBox[{"{", 
      RowBox[{"femaleNum", ",", "maleNum"}], "}"}]}], "]"}], 
   "]"}]}], "\[IndentingNewLine]", 
 RowBox[{
  RowBox[{
   RowBox[{"(", 
    RowBox[{"maleNum", " ", "+", " ", "femaleNum"}], ")"}], "/.", 
   "equilPopSizeSol"}], "//", "FullSimplify"}]}], "Input",
 CellChangeTimes->{
  3.7814601807633467`*^9, {3.781460242908415*^9, 3.781460297045966*^9}, {
   3.78146042104764*^9, 3.7814604314131813`*^9}, {3.7818849387750196`*^9, 
   3.781884939816983*^9}, {3.785242212047227*^9, 3.785242352509232*^9}, {
   3.8140084788313217`*^9, 3.8140084793896217`*^9}},
 CellLabel->
  "In[1289]:=",ExpressionUUID->"bafee36e-ee18-4c2c-add2-b705d82ee33d"],

Cell[BoxData[
 RowBox[{"{", 
  RowBox[{
   RowBox[{"{", 
    RowBox[{
     RowBox[{"femaleNum", "\[Rule]", "0"}], ",", 
     RowBox[{"maleNum", "\[Rule]", "0"}]}], "}"}], ",", 
   RowBox[{"{", 
    RowBox[{
     RowBox[{"femaleNum", "\[Rule]", 
      RowBox[{
       RowBox[{"(", 
        RowBox[{"sf", " ", 
         RowBox[{"(", 
          RowBox[{
           RowBox[{
            RowBox[{"-", 
             RowBox[{"(", 
              RowBox[{
               RowBox[{"-", "1"}], "+", "sm"}], ")"}]}], " ", 
            RowBox[{"(", 
             RowBox[{"1", "+", "\[Delta]"}], ")"}]}], "+", 
           RowBox[{"h", " ", 
            RowBox[{"(", 
             RowBox[{
              RowBox[{"-", "2"}], "+", "sm", "-", "\[Delta]", "+", 
              RowBox[{"sm", " ", "\[Delta]"}]}], ")"}]}]}], ")"}], " ", 
         RowBox[{"(", 
          RowBox[{
           RowBox[{"b", " ", 
            SuperscriptBox["h", "2"], " ", 
            SuperscriptBox["sf", "2"], " ", 
            SuperscriptBox[
             RowBox[{"(", 
              RowBox[{
               RowBox[{"-", "2"}], "+", "sm", "-", "\[Delta]", "+", 
               RowBox[{"sm", " ", "\[Delta]"}]}], ")"}], "2"]}], "+", 
           RowBox[{
            RowBox[{"(", 
             RowBox[{"sm", "-", "\[Delta]", "+", 
              RowBox[{"sm", " ", "\[Delta]"}]}], ")"}], " ", 
            RowBox[{"(", 
             RowBox[{
              RowBox[{
               RowBox[{"-", "b"}], " ", "\[Delta]"}], "+", 
              RowBox[{"sm", " ", 
               RowBox[{"(", 
                RowBox[{
                 RowBox[{"-", "4"}], "+", "b", "+", 
                 RowBox[{"b", " ", "\[Delta]"}]}], ")"}]}]}], ")"}]}], "-", 
           RowBox[{"2", " ", "sf", " ", 
            RowBox[{"(", 
             RowBox[{
              RowBox[{
               RowBox[{"-", "4"}], " ", 
               RowBox[{"(", 
                RowBox[{
                 RowBox[{"-", "1"}], "+", "sm"}], ")"}], " ", 
               RowBox[{"(", 
                RowBox[{"1", "+", "\[Delta]"}], ")"}]}], "+", 
              RowBox[{"2", " ", "b", " ", 
               RowBox[{"(", 
                RowBox[{
                 RowBox[{"-", "1"}], "+", "sm"}], ")"}], " ", 
               RowBox[{"(", 
                RowBox[{"1", "+", "\[Delta]"}], ")"}]}], "-", 
              RowBox[{"2", " ", "h", " ", 
               RowBox[{"(", 
                RowBox[{
                 RowBox[{"-", "2"}], "+", "sm"}], ")"}], " ", 
               RowBox[{"(", 
                RowBox[{
                 RowBox[{"-", "2"}], "+", "sm", "-", "\[Delta]", "+", 
                 RowBox[{"sm", " ", "\[Delta]"}]}], ")"}]}], "+", 
              RowBox[{"b", " ", "h", " ", 
               SuperscriptBox[
                RowBox[{"(", 
                 RowBox[{
                  RowBox[{"-", "2"}], "+", "sm", "-", "\[Delta]", "+", 
                  RowBox[{"sm", " ", "\[Delta]"}]}], ")"}], "2"]}]}], 
             ")"}]}]}], ")"}]}], ")"}], "/", 
       RowBox[{"(", 
        RowBox[{"b", " ", "\[Alpha]", " ", 
         RowBox[{"(", 
          RowBox[{
           RowBox[{
            RowBox[{"-", "sm"}], " ", 
            RowBox[{"(", 
             RowBox[{
              RowBox[{"sm", " ", 
               RowBox[{"(", 
                RowBox[{
                 RowBox[{"-", "1"}], "+", "\[Delta]"}], ")"}]}], "-", 
              "\[Delta]"}], ")"}], " ", 
            SuperscriptBox[
             RowBox[{"(", 
              RowBox[{"sm", "-", "\[Delta]", "+", 
               RowBox[{"sm", " ", "\[Delta]"}]}], ")"}], "2"]}], "+", 
           RowBox[{
            SuperscriptBox["h", "2"], " ", 
            SuperscriptBox["sf", "3"], " ", 
            SuperscriptBox[
             RowBox[{"(", 
              RowBox[{
               RowBox[{"-", "2"}], "+", "sm", "-", "\[Delta]", "+", 
               RowBox[{"sm", " ", "\[Delta]"}]}], ")"}], "2"], " ", 
            RowBox[{"(", 
             RowBox[{
              RowBox[{
               RowBox[{"-", 
                RowBox[{"(", 
                 RowBox[{
                  RowBox[{"-", "1"}], "+", "sm"}], ")"}]}], " ", 
               RowBox[{"(", 
                RowBox[{"1", "+", "\[Delta]"}], ")"}]}], "+", 
              RowBox[{"h", " ", 
               RowBox[{"(", 
                RowBox[{
                 RowBox[{"-", "2"}], "+", "sm", "-", "\[Delta]", "+", 
                 RowBox[{"sm", " ", "\[Delta]"}]}], ")"}]}]}], ")"}]}], "+", 
           RowBox[{
            SuperscriptBox["sf", "2"], " ", 
            RowBox[{"(", 
             RowBox[{
              RowBox[{"8", " ", 
               SuperscriptBox[
                RowBox[{"(", 
                 RowBox[{
                  RowBox[{"-", "1"}], "+", "sm"}], ")"}], "2"], " ", 
               SuperscriptBox[
                RowBox[{"(", 
                 RowBox[{"1", "+", "\[Delta]"}], ")"}], "2"]}], "+", 
              RowBox[{"2", " ", "h", " ", 
               RowBox[{"(", 
                RowBox[{"8", "-", 
                 RowBox[{"11", " ", "sm"}], "+", 
                 RowBox[{"3", " ", 
                  SuperscriptBox["sm", "2"]}]}], ")"}], " ", 
               RowBox[{"(", 
                RowBox[{"1", "+", "\[Delta]"}], ")"}], " ", 
               RowBox[{"(", 
                RowBox[{
                 RowBox[{"-", "2"}], "+", "sm", "-", "\[Delta]", "+", 
                 RowBox[{"sm", " ", "\[Delta]"}]}], ")"}]}], "-", 
              RowBox[{
               SuperscriptBox["h", "2"], " ", 
               RowBox[{"(", 
                RowBox[{
                 RowBox[{"-", "8"}], "-", 
                 RowBox[{"sm", " ", 
                  RowBox[{"(", 
                   RowBox[{
                    RowBox[{"-", "6"}], "+", "\[Delta]"}], ")"}]}], "+", 
                 RowBox[{
                  SuperscriptBox["sm", "2"], " ", 
                  RowBox[{"(", 
                   RowBox[{
                    RowBox[{"-", "1"}], "+", "\[Delta]"}], ")"}]}]}], ")"}], 
               " ", 
               SuperscriptBox[
                RowBox[{"(", 
                 RowBox[{
                  RowBox[{"-", "2"}], "+", "sm", "-", "\[Delta]", "+", 
                  RowBox[{"sm", " ", "\[Delta]"}]}], ")"}], "2"]}]}], ")"}]}],
            "+", 
           RowBox[{"sf", " ", 
            RowBox[{"(", 
             RowBox[{"sm", "-", "\[Delta]", "+", 
              RowBox[{"sm", " ", "\[Delta]"}]}], ")"}], " ", 
            RowBox[{"(", 
             RowBox[{
              RowBox[{"2", " ", "h", " ", 
               SuperscriptBox["sm", "3"], " ", 
               RowBox[{"(", 
                RowBox[{
                 RowBox[{"-", "1"}], "+", 
                 SuperscriptBox["\[Delta]", "2"]}], ")"}]}], "+", 
              RowBox[{"\[Delta]", " ", 
               RowBox[{"(", 
                RowBox[{"1", "+", "\[Delta]", "-", 
                 RowBox[{"h", " ", 
                  RowBox[{"(", 
                   RowBox[{"2", "+", "\[Delta]"}], ")"}]}]}], ")"}]}], "+", 
              RowBox[{
               SuperscriptBox["sm", "2"], " ", 
               RowBox[{"(", 
                RowBox[{
                 RowBox[{"-", "5"}], "-", 
                 RowBox[{"4", " ", "\[Delta]"}], "+", 
                 SuperscriptBox["\[Delta]", "2"], "+", 
                 RowBox[{"h", " ", 
                  RowBox[{"(", 
                   RowBox[{"9", "-", 
                    RowBox[{"5", " ", 
                    SuperscriptBox["\[Delta]", "2"]}]}], ")"}]}]}], ")"}]}], 
              "+", 
              RowBox[{"sm", " ", 
               RowBox[{"(", 
                RowBox[{"5", "+", 
                 RowBox[{"3", " ", "\[Delta]"}], "-", 
                 RowBox[{"2", " ", 
                  SuperscriptBox["\[Delta]", "2"]}], "+", 
                 RowBox[{"2", " ", "h", " ", 
                  RowBox[{"(", 
                   RowBox[{
                    RowBox[{"-", "5"}], "+", "\[Delta]", "+", 
                    RowBox[{"2", " ", 
                    SuperscriptBox["\[Delta]", "2"]}]}], ")"}]}]}], ")"}]}]}],
              ")"}]}]}], ")"}]}], ")"}]}]}], ",", 
     RowBox[{"maleNum", "\[Rule]", 
      RowBox[{"-", 
       RowBox[{"(", 
        RowBox[{
         RowBox[{"(", 
          RowBox[{
           RowBox[{"(", 
            RowBox[{
             RowBox[{"b", " ", 
              SuperscriptBox["h", "2"], " ", 
              SuperscriptBox["sf", "2"], " ", 
              SuperscriptBox[
               RowBox[{"(", 
                RowBox[{
                 RowBox[{"-", "2"}], "+", "sm", "-", "\[Delta]", "+", 
                 RowBox[{"sm", " ", "\[Delta]"}]}], ")"}], "2"]}], "+", 
             RowBox[{
              RowBox[{"(", 
               RowBox[{"sm", "-", "\[Delta]", "+", 
                RowBox[{"sm", " ", "\[Delta]"}]}], ")"}], " ", 
              RowBox[{"(", 
               RowBox[{
                RowBox[{
                 RowBox[{"-", "b"}], " ", "\[Delta]"}], "+", 
                RowBox[{"sm", " ", 
                 RowBox[{"(", 
                  RowBox[{
                   RowBox[{"-", "4"}], "+", "b", "+", 
                   RowBox[{"b", " ", "\[Delta]"}]}], ")"}]}]}], ")"}]}], "-", 
             RowBox[{"2", " ", "sf", " ", 
              RowBox[{"(", 
               RowBox[{
                RowBox[{
                 RowBox[{"-", "4"}], " ", 
                 RowBox[{"(", 
                  RowBox[{
                   RowBox[{"-", "1"}], "+", "sm"}], ")"}], " ", 
                 RowBox[{"(", 
                  RowBox[{"1", "+", "\[Delta]"}], ")"}]}], "+", 
                RowBox[{"2", " ", "b", " ", 
                 RowBox[{"(", 
                  RowBox[{
                   RowBox[{"-", "1"}], "+", "sm"}], ")"}], " ", 
                 RowBox[{"(", 
                  RowBox[{"1", "+", "\[Delta]"}], ")"}]}], "-", 
                RowBox[{"2", " ", "h", " ", 
                 RowBox[{"(", 
                  RowBox[{
                   RowBox[{"-", "2"}], "+", "sm"}], ")"}], " ", 
                 RowBox[{"(", 
                  RowBox[{
                   RowBox[{"-", "2"}], "+", "sm", "-", "\[Delta]", "+", 
                   RowBox[{"sm", " ", "\[Delta]"}]}], ")"}]}], "+", 
                RowBox[{"b", " ", "h", " ", 
                 SuperscriptBox[
                  RowBox[{"(", 
                   RowBox[{
                    RowBox[{"-", "2"}], "+", "sm", "-", "\[Delta]", "+", 
                    RowBox[{"sm", " ", "\[Delta]"}]}], ")"}], "2"]}]}], 
               ")"}]}]}], ")"}], " ", 
           RowBox[{"(", 
            RowBox[{
             RowBox[{"sm", " ", 
              RowBox[{"(", 
               RowBox[{
                RowBox[{"sm", " ", 
                 RowBox[{"(", 
                  RowBox[{
                   RowBox[{"-", "1"}], "+", "\[Delta]"}], ")"}]}], "-", 
                "\[Delta]"}], ")"}], " ", 
              SuperscriptBox[
               RowBox[{"(", 
                RowBox[{"sm", "-", "\[Delta]", "+", 
                 RowBox[{"sm", " ", "\[Delta]"}]}], ")"}], "2"]}], "+", 
             RowBox[{
              SuperscriptBox["sf", "2"], " ", 
              RowBox[{"(", 
               RowBox[{
                RowBox[{
                 RowBox[{"-", "4"}], " ", 
                 SuperscriptBox[
                  RowBox[{"(", 
                   RowBox[{
                    RowBox[{"-", "1"}], "+", "sm"}], ")"}], "2"], " ", 
                 SuperscriptBox[
                  RowBox[{"(", 
                   RowBox[{"1", "+", "\[Delta]"}], ")"}], "2"]}], "+", 
                RowBox[{
                 SuperscriptBox["h", "2"], " ", 
                 RowBox[{"(", 
                  RowBox[{
                   RowBox[{"-", "2"}], "+", "sm"}], ")"}], " ", 
                 RowBox[{"(", 
                  RowBox[{"2", "+", 
                   RowBox[{"sm", " ", 
                    RowBox[{"(", 
                    RowBox[{
                    RowBox[{"-", "1"}], "+", "\[Delta]"}], ")"}]}], "-", 
                   "\[Delta]"}], ")"}], " ", 
                 SuperscriptBox[
                  RowBox[{"(", 
                   RowBox[{
                    RowBox[{"-", "2"}], "+", "sm", "-", "\[Delta]", "+", 
                    RowBox[{"sm", " ", "\[Delta]"}]}], ")"}], "2"]}], "+", 
                RowBox[{"2", " ", "h", " ", 
                 RowBox[{"(", 
                  RowBox[{
                   RowBox[{"-", "1"}], "+", "sm"}], ")"}], " ", 
                 RowBox[{"(", 
                  RowBox[{"1", "+", "\[Delta]"}], ")"}], " ", 
                 RowBox[{"(", 
                  RowBox[{
                   RowBox[{"-", "8"}], "-", 
                   RowBox[{"2", " ", "\[Delta]"}], "+", 
                   SuperscriptBox["\[Delta]", "2"], "+", 
                   RowBox[{"sm", " ", 
                    RowBox[{"(", 
                    RowBox[{"8", "+", 
                    RowBox[{"3", " ", "\[Delta]"}], "-", 
                    RowBox[{"2", " ", 
                    SuperscriptBox["\[Delta]", "2"]}]}], ")"}]}], "+", 
                   RowBox[{
                    SuperscriptBox["sm", "2"], " ", 
                    RowBox[{"(", 
                    RowBox[{
                    RowBox[{"-", "2"}], "-", "\[Delta]", "+", 
                    SuperscriptBox["\[Delta]", "2"]}], ")"}]}]}], ")"}]}]}], 
               ")"}]}], "-", 
             RowBox[{"2", " ", "sf", " ", 
              RowBox[{"(", 
               RowBox[{"sm", "-", "\[Delta]", "+", 
                RowBox[{"sm", " ", "\[Delta]"}]}], ")"}], " ", 
              RowBox[{"(", 
               RowBox[{
                RowBox[{"h", " ", 
                 SuperscriptBox["sm", "3"], " ", 
                 RowBox[{"(", 
                  RowBox[{
                   RowBox[{"-", "1"}], "+", 
                   SuperscriptBox["\[Delta]", "2"]}], ")"}]}], "+", 
                RowBox[{"\[Delta]", " ", 
                 RowBox[{"(", 
                  RowBox[{"1", "+", "\[Delta]", "-", 
                   RowBox[{"h", " ", 
                    RowBox[{"(", 
                    RowBox[{"2", "+", "\[Delta]"}], ")"}]}]}], ")"}]}], "-", 
                RowBox[{
                 SuperscriptBox["sm", "2"], " ", 
                 RowBox[{"(", 
                  RowBox[{"2", "+", "\[Delta]", "-", 
                   SuperscriptBox["\[Delta]", "2"], "+", 
                   RowBox[{"h", " ", 
                    RowBox[{"(", 
                    RowBox[{
                    RowBox[{"-", "4"}], "+", "\[Delta]", "+", 
                    RowBox[{"3", " ", 
                    SuperscriptBox["\[Delta]", "2"]}]}], ")"}]}]}], ")"}]}], 
                "+", 
                RowBox[{"sm", " ", 
                 RowBox[{"(", 
                  RowBox[{"2", "-", 
                   RowBox[{"2", " ", 
                    SuperscriptBox["\[Delta]", "2"]}], "+", 
                   RowBox[{"h", " ", 
                    RowBox[{"(", 
                    RowBox[{
                    RowBox[{"-", "4"}], "+", 
                    RowBox[{"3", " ", "\[Delta]"}], "+", 
                    RowBox[{"3", " ", 
                    SuperscriptBox["\[Delta]", "2"]}]}], ")"}]}]}], ")"}]}]}],
                ")"}]}]}], ")"}]}], ")"}], "/", 
         RowBox[{"(", 
          RowBox[{"b", " ", "\[Alpha]", " ", 
           RowBox[{"(", 
            RowBox[{
             RowBox[{
              RowBox[{"-", "sm"}], " ", 
              RowBox[{"(", 
               RowBox[{
                RowBox[{"sm", " ", 
                 RowBox[{"(", 
                  RowBox[{
                   RowBox[{"-", "1"}], "+", "\[Delta]"}], ")"}]}], "-", 
                "\[Delta]"}], ")"}], " ", 
              SuperscriptBox[
               RowBox[{"(", 
                RowBox[{"sm", "-", "\[Delta]", "+", 
                 RowBox[{"sm", " ", "\[Delta]"}]}], ")"}], "4"]}], "+", 
             RowBox[{
              SuperscriptBox["h", "4"], " ", 
              SuperscriptBox["sf", "5"], " ", 
              SuperscriptBox[
               RowBox[{"(", 
                RowBox[{
                 RowBox[{"-", "2"}], "+", "sm", "-", "\[Delta]", "+", 
                 RowBox[{"sm", " ", "\[Delta]"}]}], ")"}], "4"], " ", 
              RowBox[{"(", 
               RowBox[{
                RowBox[{
                 RowBox[{"-", 
                  RowBox[{"(", 
                   RowBox[{
                    RowBox[{"-", "1"}], "+", "sm"}], ")"}]}], " ", 
                 RowBox[{"(", 
                  RowBox[{"1", "+", "\[Delta]"}], ")"}]}], "+", 
                RowBox[{"h", " ", 
                 RowBox[{"(", 
                  RowBox[{
                   RowBox[{"-", "2"}], "+", "sm", "-", "\[Delta]", "+", 
                   RowBox[{"sm", " ", "\[Delta]"}]}], ")"}]}]}], ")"}]}], "-", 
             RowBox[{
              SuperscriptBox["h", "2"], " ", 
              SuperscriptBox["sf", "4"], " ", 
              SuperscriptBox[
               RowBox[{"(", 
                RowBox[{
                 RowBox[{"-", "2"}], "+", "sm", "-", "\[Delta]", "+", 
                 RowBox[{"sm", " ", "\[Delta]"}]}], ")"}], "2"], " ", 
              RowBox[{"(", 
               RowBox[{
                RowBox[{
                 RowBox[{"-", "12"}], " ", 
                 SuperscriptBox[
                  RowBox[{"(", 
                   RowBox[{
                    RowBox[{"-", "1"}], "+", "sm"}], ")"}], "2"], " ", 
                 SuperscriptBox[
                  RowBox[{"(", 
                   RowBox[{"1", "+", "\[Delta]"}], ")"}], "2"]}], "+", 
                RowBox[{
                 SuperscriptBox["h", "2"], " ", 
                 SuperscriptBox[
                  RowBox[{"(", 
                   RowBox[{
                    RowBox[{"-", "2"}], "+", "sm", "-", "\[Delta]", "+", 
                    RowBox[{"sm", " ", "\[Delta]"}]}], ")"}], "2"], " ", 
                 RowBox[{"(", 
                  RowBox[{
                   RowBox[{
                    SuperscriptBox["sm", "2"], " ", 
                    RowBox[{"(", 
                    RowBox[{
                    RowBox[{"-", "1"}], "+", "\[Delta]"}], ")"}]}], "-", 
                   RowBox[{"2", " ", 
                    RowBox[{"(", 
                    RowBox[{"6", "+", "\[Delta]"}], ")"}]}], "+", 
                   RowBox[{"sm", " ", 
                    RowBox[{"(", 
                    RowBox[{"8", "+", "\[Delta]"}], ")"}]}]}], ")"}]}], "-", 
                RowBox[{"2", " ", "h", " ", 
                 RowBox[{"(", 
                  RowBox[{
                   RowBox[{"-", "1"}], "+", "sm"}], ")"}], " ", 
                 RowBox[{"(", 
                  RowBox[{"1", "+", "\[Delta]"}], ")"}], " ", 
                 RowBox[{"(", 
                  RowBox[{"24", "+", 
                   RowBox[{"14", " ", "\[Delta]"}], "+", 
                   SuperscriptBox["\[Delta]", "2"], "+", 
                   RowBox[{
                    SuperscriptBox["sm", "2"], " ", 
                    RowBox[{"(", 
                    RowBox[{"4", "+", 
                    RowBox[{"5", " ", "\[Delta]"}], "+", 
                    SuperscriptBox["\[Delta]", "2"]}], ")"}]}], "-", 
                   RowBox[{"sm", " ", 
                    RowBox[{"(", 
                    RowBox[{"20", "+", 
                    RowBox[{"19", " ", "\[Delta]"}], "+", 
                    RowBox[{"2", " ", 
                    SuperscriptBox["\[Delta]", "2"]}]}], ")"}]}]}], ")"}]}]}],
                ")"}]}], "+", 
             RowBox[{"2", " ", 
              SuperscriptBox["sf", "3"], " ", 
              RowBox[{"(", 
               RowBox[{
                RowBox[{
                 RowBox[{"-", "16"}], " ", 
                 SuperscriptBox[
                  RowBox[{"(", 
                   RowBox[{
                    RowBox[{"-", "1"}], "+", "sm"}], ")"}], "3"], " ", 
                 SuperscriptBox[
                  RowBox[{"(", 
                   RowBox[{"1", "+", "\[Delta]"}], ")"}], "3"]}], "-", 
                RowBox[{
                 SuperscriptBox["h", "2"], " ", 
                 RowBox[{"(", 
                  RowBox[{
                   RowBox[{"-", "1"}], "+", "sm"}], ")"}], " ", 
                 RowBox[{"(", 
                  RowBox[{"1", "+", "\[Delta]"}], ")"}], " ", 
                 SuperscriptBox[
                  RowBox[{"(", 
                   RowBox[{
                    RowBox[{"-", "2"}], "+", "sm", "-", "\[Delta]", "+", 
                    RowBox[{"sm", " ", "\[Delta]"}]}], ")"}], "2"], " ", 
                 RowBox[{"(", 
                  RowBox[{
                   RowBox[{"16", " ", 
                    RowBox[{"(", 
                    RowBox[{"3", "+", "\[Delta]"}], ")"}]}], "+", 
                   RowBox[{
                    SuperscriptBox["sm", "2"], " ", 
                    RowBox[{"(", 
                    RowBox[{"11", "+", 
                    RowBox[{"7", " ", "\[Delta]"}]}], ")"}]}], "-", 
                   RowBox[{"sm", " ", 
                    RowBox[{"(", 
                    RowBox[{"40", "+", 
                    RowBox[{"23", " ", "\[Delta]"}]}], ")"}]}]}], ")"}]}], 
                "+", 
                RowBox[{
                 SuperscriptBox["h", "3"], " ", 
                 SuperscriptBox[
                  RowBox[{"(", 
                   RowBox[{
                    RowBox[{"-", "2"}], "+", "sm", "-", "\[Delta]", "+", 
                    RowBox[{"sm", " ", "\[Delta]"}]}], ")"}], "3"], " ", 
                 RowBox[{"(", 
                  RowBox[{
                   RowBox[{"8", " ", 
                    RowBox[{"(", 
                    RowBox[{"2", "+", "\[Delta]"}], ")"}]}], "+", 
                   RowBox[{
                    SuperscriptBox["sm", "2"], " ", 
                    RowBox[{"(", 
                    RowBox[{"11", "+", 
                    RowBox[{"7", " ", "\[Delta]"}], "-", 
                    RowBox[{"4", " ", 
                    SuperscriptBox["\[Delta]", "2"]}]}], ")"}]}], "+", 
                   RowBox[{"2", " ", 
                    SuperscriptBox["sm", "3"], " ", 
                    RowBox[{"(", 
                    RowBox[{
                    RowBox[{"-", "1"}], "+", 
                    SuperscriptBox["\[Delta]", "2"]}], ")"}]}], "+", 
                   RowBox[{"sm", " ", 
                    RowBox[{"(", 
                    RowBox[{
                    RowBox[{"-", "20"}], "-", 
                    RowBox[{"15", " ", "\[Delta]"}], "+", 
                    RowBox[{"2", " ", 
                    SuperscriptBox["\[Delta]", "2"]}]}], ")"}]}]}], ")"}]}], 
                "-", 
                RowBox[{"4", " ", "h", " ", 
                 SuperscriptBox[
                  RowBox[{"(", 
                   RowBox[{
                    RowBox[{"-", "1"}], "+", "sm"}], ")"}], "2"], " ", 
                 SuperscriptBox[
                  RowBox[{"(", 
                   RowBox[{"1", "+", "\[Delta]"}], ")"}], "2"], " ", 
                 RowBox[{"(", 
                  RowBox[{
                   RowBox[{"2", " ", 
                    RowBox[{"(", 
                    RowBox[{"12", "+", 
                    RowBox[{"8", " ", "\[Delta]"}], "+", 
                    SuperscriptBox["\[Delta]", "2"]}], ")"}]}], "+", 
                   RowBox[{
                    SuperscriptBox["sm", "2"], " ", 
                    RowBox[{"(", 
                    RowBox[{"5", "+", 
                    RowBox[{"7", " ", "\[Delta]"}], "+", 
                    RowBox[{"2", " ", 
                    SuperscriptBox["\[Delta]", "2"]}]}], ")"}]}], "-", 
                   RowBox[{"sm", " ", 
                    RowBox[{"(", 
                    RowBox[{"22", "+", 
                    RowBox[{"23", " ", "\[Delta]"}], "+", 
                    RowBox[{"4", " ", 
                    SuperscriptBox["\[Delta]", "2"]}]}], ")"}]}]}], ")"}]}]}],
                ")"}]}], "+", 
             RowBox[{"sf", " ", 
              SuperscriptBox[
               RowBox[{"(", 
                RowBox[{"sm", "-", "\[Delta]", "+", 
                 RowBox[{"sm", " ", "\[Delta]"}]}], ")"}], "2"], " ", 
              RowBox[{"(", 
               RowBox[{
                RowBox[{"4", " ", "h", " ", 
                 SuperscriptBox["sm", "4"], " ", 
                 RowBox[{"(", 
                  RowBox[{
                   RowBox[{"-", "1"}], "+", "\[Delta]"}], ")"}], " ", 
                 SuperscriptBox[
                  RowBox[{"(", 
                   RowBox[{"1", "+", "\[Delta]"}], ")"}], "2"]}], "+", 
                RowBox[{"sm", " ", 
                 SuperscriptBox["\[Delta]", "2"], " ", 
                 RowBox[{"(", 
                  RowBox[{"3", "-", 
                   RowBox[{"13", " ", "h"}], "+", 
                   RowBox[{"3", " ", "\[Delta]"}], "-", 
                   RowBox[{"7", " ", "h", " ", "\[Delta]"}]}], ")"}]}], "+", 
                RowBox[{
                 SuperscriptBox["\[Delta]", "2"], " ", 
                 RowBox[{"(", 
                  RowBox[{
                   RowBox[{"-", "1"}], "-", "\[Delta]", "+", 
                   RowBox[{"h", " ", 
                    RowBox[{"(", 
                    RowBox[{"2", "+", "\[Delta]"}], ")"}]}]}], ")"}]}], "+", 
                RowBox[{"3", " ", 
                 SuperscriptBox["sm", "2"], " ", 
                 RowBox[{"(", 
                  RowBox[{"1", "+", "\[Delta]"}], ")"}], " ", 
                 RowBox[{"(", 
                  RowBox[{"3", "-", 
                   SuperscriptBox["\[Delta]", "2"], "+", 
                   RowBox[{"h", " ", 
                    RowBox[{"(", 
                    RowBox[{
                    RowBox[{"-", "6"}], "+", 
                    RowBox[{"3", " ", "\[Delta]"}], "+", 
                    RowBox[{"5", " ", 
                    SuperscriptBox["\[Delta]", "2"]}]}], ")"}]}]}], ")"}]}], 
                "-", 
                RowBox[{
                 SuperscriptBox["sm", "3"], " ", 
                 RowBox[{"(", 
                  RowBox[{"1", "+", "\[Delta]"}], ")"}], " ", 
                 RowBox[{"(", 
                  RowBox[{"9", "-", 
                   SuperscriptBox["\[Delta]", "2"], "+", 
                   RowBox[{"h", " ", 
                    RowBox[{"(", 
                    RowBox[{
                    RowBox[{"-", "17"}], "+", 
                    RowBox[{"4", " ", "\[Delta]"}], "+", 
                    RowBox[{"13", " ", 
                    SuperscriptBox["\[Delta]", "2"]}]}], ")"}]}]}], ")"}]}]}],
                ")"}]}], "-", 
             RowBox[{"2", " ", 
              SuperscriptBox["sf", "2"], " ", 
              RowBox[{"(", 
               RowBox[{"sm", "-", "\[Delta]", "+", 
                RowBox[{"sm", " ", "\[Delta]"}]}], ")"}], " ", 
              RowBox[{"(", 
               RowBox[{
                RowBox[{"3", " ", 
                 SuperscriptBox["h", "2"], " ", 
                 SuperscriptBox["sm", "5"], " ", 
                 RowBox[{"(", 
                  RowBox[{
                   RowBox[{"-", "1"}], "+", "\[Delta]"}], ")"}], " ", 
                 SuperscriptBox[
                  RowBox[{"(", 
                   RowBox[{"1", "+", "\[Delta]"}], ")"}], "3"]}], "-", 
                RowBox[{"h", " ", 
                 SuperscriptBox["sm", "4"], " ", 
                 SuperscriptBox[
                  RowBox[{"(", 
                   RowBox[{"1", "+", "\[Delta]"}], ")"}], "2"], " ", 
                 RowBox[{"(", 
                  RowBox[{"12", "+", 
                   RowBox[{"3", " ", "\[Delta]"}], "-", 
                   SuperscriptBox["\[Delta]", "2"], "+", 
                   RowBox[{"h", " ", 
                    RowBox[{"(", 
                    RowBox[{
                    RowBox[{"-", "24"}], "+", 
                    RowBox[{"3", " ", "\[Delta]"}], "+", 
                    RowBox[{"13", " ", 
                    SuperscriptBox["\[Delta]", "2"]}]}], ")"}]}]}], ")"}]}], 
                "+", 
                RowBox[{"\[Delta]", " ", 
                 RowBox[{"(", 
                  RowBox[{
                   RowBox[{"2", " ", 
                    SuperscriptBox[
                    RowBox[{"(", 
                    RowBox[{"1", "+", "\[Delta]"}], ")"}], "2"]}], "-", 
                   RowBox[{
                    SuperscriptBox["h", "2"], " ", 
                    RowBox[{"(", 
                    RowBox[{
                    RowBox[{"-", "2"}], "+", "\[Delta]"}], ")"}], " ", 
                    SuperscriptBox[
                    RowBox[{"(", 
                    RowBox[{"2", "+", "\[Delta]"}], ")"}], "2"]}], "+", 
                   RowBox[{"h", " ", 
                    RowBox[{"(", 
                    RowBox[{
                    RowBox[{"-", "8"}], "-", 
                    RowBox[{"10", " ", "\[Delta]"}], "-", 
                    SuperscriptBox["\[Delta]", "2"], "+", 
                    SuperscriptBox["\[Delta]", "3"]}], ")"}]}]}], ")"}]}], 
                "+", 
                RowBox[{
                 SuperscriptBox["sm", "3"], " ", 
                 RowBox[{"(", 
                  RowBox[{"1", "+", "\[Delta]"}], ")"}], " ", 
                 RowBox[{"(", 
                  RowBox[{
                   RowBox[{
                    RowBox[{"-", "2"}], " ", 
                    RowBox[{"(", 
                    RowBox[{"7", "+", 
                    RowBox[{"8", " ", "\[Delta]"}], "+", 
                    SuperscriptBox["\[Delta]", "2"]}], ")"}]}], "+", 
                   RowBox[{"h", " ", 
                    RowBox[{"(", 
                    RowBox[{"64", "+", 
                    RowBox[{"68", " ", "\[Delta]"}], "+", 
                    RowBox[{"8", " ", 
                    SuperscriptBox["\[Delta]", "2"]}], "-", 
                    RowBox[{"4", " ", 
                    SuperscriptBox["\[Delta]", "3"]}]}], ")"}]}], "+", 
                   RowBox[{
                    SuperscriptBox["h", "2"], " ", 
                    RowBox[{"(", 
                    RowBox[{
                    RowBox[{"-", "74"}], "-", 
                    RowBox[{"55", " ", "\[Delta]"}], "+", 
                    RowBox[{"31", " ", 
                    SuperscriptBox["\[Delta]", "2"]}], "+", 
                    RowBox[{"22", " ", 
                    SuperscriptBox["\[Delta]", "3"]}]}], ")"}]}]}], ")"}]}], 
                "+", 
                RowBox[{
                 SuperscriptBox["sm", "2"], " ", 
                 RowBox[{"(", 
                  RowBox[{
                   RowBox[{"2", " ", 
                    SuperscriptBox[
                    RowBox[{"(", 
                    RowBox[{"1", "+", "\[Delta]"}], ")"}], "2"], " ", 
                    RowBox[{"(", 
                    RowBox[{"14", "+", 
                    RowBox[{"3", " ", "\[Delta]"}]}], ")"}]}], "+", 
                   RowBox[{
                    SuperscriptBox["h", "2"], " ", 
                    RowBox[{"(", 
                    RowBox[{"104", "+", 
                    RowBox[{"166", " ", "\[Delta]"}], "+", 
                    RowBox[{"37", " ", 
                    SuperscriptBox["\[Delta]", "2"]}], "-", 
                    RowBox[{"45", " ", 
                    SuperscriptBox["\[Delta]", "3"]}], "-", 
                    RowBox[{"18", " ", 
                    SuperscriptBox["\[Delta]", "4"]}]}], ")"}]}], "+", 
                   RowBox[{"3", " ", "h", " ", 
                    RowBox[{"(", 
                    RowBox[{
                    RowBox[{"-", "36"}], "-", 
                    RowBox[{"69", " ", "\[Delta]"}], "-", 
                    RowBox[{"37", " ", 
                    SuperscriptBox["\[Delta]", "2"]}], "-", 
                    RowBox[{"2", " ", 
                    SuperscriptBox["\[Delta]", "3"]}], "+", 
                    RowBox[{"2", " ", 
                    SuperscriptBox["\[Delta]", "4"]}]}], ")"}]}]}], ")"}]}], 
                "+", 
                RowBox[{"sm", " ", 
                 RowBox[{"(", 
                  RowBox[{
                   RowBox[{
                    RowBox[{"-", "2"}], " ", 
                    SuperscriptBox[
                    RowBox[{"(", 
                    RowBox[{"1", "+", "\[Delta]"}], ")"}], "2"], " ", 
                    RowBox[{"(", 
                    RowBox[{"7", "+", 
                    RowBox[{"3", " ", "\[Delta]"}]}], ")"}]}], "+", 
                   RowBox[{"h", " ", 
                    RowBox[{"(", 
                    RowBox[{"56", "+", 
                    RowBox[{"110", " ", "\[Delta]"}], "+", 
                    RowBox[{"62", " ", 
                    SuperscriptBox["\[Delta]", "2"]}], "+", 
                    RowBox[{"4", " ", 
                    SuperscriptBox["\[Delta]", "3"]}], "-", 
                    RowBox[{"4", " ", 
                    SuperscriptBox["\[Delta]", "4"]}]}], ")"}]}], "+", 
                   RowBox[{
                    SuperscriptBox["h", "2"], " ", 
                    RowBox[{"(", 
                    RowBox[{
                    RowBox[{"-", "56"}], "-", 
                    RowBox[{"84", " ", "\[Delta]"}], "-", 
                    RowBox[{"22", " ", 
                    SuperscriptBox["\[Delta]", "2"]}], "+", 
                    RowBox[{"17", " ", 
                    SuperscriptBox["\[Delta]", "3"]}], "+", 
                    RowBox[{"7", " ", 
                    SuperscriptBox["\[Delta]", "4"]}]}], ")"}]}]}], ")"}]}]}],
                ")"}]}]}], ")"}]}], ")"}]}], ")"}]}]}]}], "}"}]}], 
  "}"}]], "Output",
 CellChangeTimes->{{3.781460169945362*^9, 3.781460181056621*^9}, {
   3.781460263051641*^9, 3.781460298327677*^9}, {3.7814604223927298`*^9, 
   3.7814604321227903`*^9}, {3.781884936146596*^9, 3.781884950383851*^9}, 
   3.781888143776909*^9, 3.781888779399761*^9, 3.781952838781995*^9, 
   3.781952912022429*^9, 3.781953909942618*^9, 3.78195394409758*^9, 
   3.7821306694949303`*^9, 3.783078910864347*^9, 3.785152392323344*^9, 
   3.785162725603114*^9, 3.785164902578751*^9, 3.785164953595057*^9, 
   3.785164992909616*^9, 3.785165144424354*^9, {3.785242217151107*^9, 
   3.785242356886571*^9}, 3.78557243807008*^9, 3.785588400664415*^9, 
   3.789732682930251*^9, 3.7900785884225082`*^9, 3.795174674139629*^9, 
   3.799753847213955*^9, 3.7997540084461193`*^9, 3.800007973864676*^9, 
   3.800268200382759*^9, 3.813928149298214*^9, 3.814019806603877*^9, 
   3.8140813237764463`*^9, 3.814189397961047*^9, 3.814195962054716*^9, 
   3.81419651136869*^9},
 CellLabel->
  "Out[1290]=",ExpressionUUID->"9eae98eb-9b60-4173-be0b-3b853ab230b0"],

Cell[BoxData[
 RowBox[{"{", 
  RowBox[{"0", ",", 
   RowBox[{
    RowBox[{"(", 
     RowBox[{
      RowBox[{"b", " ", 
       SuperscriptBox["h", "2"], " ", 
       SuperscriptBox["sf", "2"], " ", 
       SuperscriptBox[
        RowBox[{"(", 
         RowBox[{
          RowBox[{"-", "2"}], "+", "sm", "+", 
          RowBox[{
           RowBox[{"(", 
            RowBox[{
             RowBox[{"-", "1"}], "+", "sm"}], ")"}], " ", "\[Delta]"}]}], 
         ")"}], "2"]}], "+", 
      RowBox[{
       RowBox[{"(", 
        RowBox[{"sm", "+", 
         RowBox[{
          RowBox[{"(", 
           RowBox[{
            RowBox[{"-", "1"}], "+", "sm"}], ")"}], " ", "\[Delta]"}]}], 
        ")"}], " ", 
       RowBox[{"(", 
        RowBox[{
         RowBox[{
          RowBox[{"(", 
           RowBox[{
            RowBox[{"-", "4"}], "+", "b"}], ")"}], " ", "sm"}], "+", 
         RowBox[{"b", " ", 
          RowBox[{"(", 
           RowBox[{
            RowBox[{"-", "1"}], "+", "sm"}], ")"}], " ", "\[Delta]"}]}], 
        ")"}]}], "-", 
      RowBox[{"2", " ", "sf", " ", 
       RowBox[{"(", 
        RowBox[{
         RowBox[{
          RowBox[{"-", "4"}], " ", 
          RowBox[{"(", 
           RowBox[{
            RowBox[{"-", "1"}], "+", "sm"}], ")"}], " ", 
          RowBox[{"(", 
           RowBox[{"1", "+", "\[Delta]"}], ")"}]}], "+", 
         RowBox[{"2", " ", "b", " ", 
          RowBox[{"(", 
           RowBox[{
            RowBox[{"-", "1"}], "+", "sm"}], ")"}], " ", 
          RowBox[{"(", 
           RowBox[{"1", "+", "\[Delta]"}], ")"}]}], "-", 
         RowBox[{"2", " ", "h", " ", 
          RowBox[{"(", 
           RowBox[{
            RowBox[{"-", "2"}], "+", "sm"}], ")"}], " ", 
          RowBox[{"(", 
           RowBox[{
            RowBox[{"-", "2"}], "+", "sm", "+", 
            RowBox[{
             RowBox[{"(", 
              RowBox[{
               RowBox[{"-", "1"}], "+", "sm"}], ")"}], " ", "\[Delta]"}]}], 
           ")"}]}], "+", 
         RowBox[{"b", " ", "h", " ", 
          SuperscriptBox[
           RowBox[{"(", 
            RowBox[{
             RowBox[{"-", "2"}], "+", "sm", "+", 
             RowBox[{
              RowBox[{"(", 
               RowBox[{
                RowBox[{"-", "1"}], "+", "sm"}], ")"}], " ", "\[Delta]"}]}], 
            ")"}], "2"]}]}], ")"}]}]}], ")"}], "/", 
    RowBox[{"(", 
     RowBox[{"b", " ", "\[Alpha]", " ", 
      RowBox[{"(", 
       RowBox[{
        RowBox[{
         RowBox[{"-", "4"}], " ", "sf", " ", 
         RowBox[{"(", 
          RowBox[{
           RowBox[{"-", "1"}], "+", "sm"}], ")"}], " ", 
         RowBox[{"(", 
          RowBox[{"1", "+", "\[Delta]"}], ")"}]}], "-", 
        RowBox[{"2", " ", "h", " ", "sf", " ", 
         SuperscriptBox[
          RowBox[{"(", 
           RowBox[{
            RowBox[{"-", "2"}], "+", "sm", "+", 
            RowBox[{
             RowBox[{"(", 
              RowBox[{
               RowBox[{"-", "1"}], "+", "sm"}], ")"}], " ", "\[Delta]"}]}], 
           ")"}], "2"]}], "+", 
        RowBox[{
         SuperscriptBox["h", "2"], " ", 
         SuperscriptBox["sf", "2"], " ", 
         SuperscriptBox[
          RowBox[{"(", 
           RowBox[{
            RowBox[{"-", "2"}], "+", "sm", "+", 
            RowBox[{
             RowBox[{"(", 
              RowBox[{
               RowBox[{"-", "1"}], "+", "sm"}], ")"}], " ", "\[Delta]"}]}], 
           ")"}], "2"]}], "+", 
        SuperscriptBox[
         RowBox[{"(", 
          RowBox[{"sm", "+", 
           RowBox[{
            RowBox[{"(", 
             RowBox[{
              RowBox[{"-", "1"}], "+", "sm"}], ")"}], " ", "\[Delta]"}]}], 
          ")"}], "2"]}], ")"}]}], ")"}]}]}], "}"}]], "Output",
 CellChangeTimes->{{3.781460169945362*^9, 3.781460181056621*^9}, {
   3.781460263051641*^9, 3.781460298327677*^9}, {3.7814604223927298`*^9, 
   3.7814604321227903`*^9}, {3.781884936146596*^9, 3.781884950383851*^9}, 
   3.781888143776909*^9, 3.781888779399761*^9, 3.781952838781995*^9, 
   3.781952912022429*^9, 3.781953909942618*^9, 3.78195394409758*^9, 
   3.7821306694949303`*^9, 3.783078910864347*^9, 3.785152392323344*^9, 
   3.785162725603114*^9, 3.785164902578751*^9, 3.785164953595057*^9, 
   3.785164992909616*^9, 3.785165144424354*^9, {3.785242217151107*^9, 
   3.785242356886571*^9}, 3.78557243807008*^9, 3.785588400664415*^9, 
   3.789732682930251*^9, 3.7900785884225082`*^9, 3.795174674139629*^9, 
   3.799753847213955*^9, 3.7997540084461193`*^9, 3.800007973864676*^9, 
   3.800268200382759*^9, 3.813928149298214*^9, 3.814019806603877*^9, 
   3.8140813237764463`*^9, 3.814189397961047*^9, 3.814195962054716*^9, 
   3.814196512406578*^9},
 CellLabel->
  "Out[1291]=",ExpressionUUID->"5e2aab2e-0478-4fbb-89c8-bda8cb3001c5"]
}, Open  ]],

Cell["\<\
Verify this is an equilibrium by seeing if the difference equations are 0 at \
this point\
\>", "Text",
 CellChangeTimes->{{3.7814604537964993`*^9, 
  3.781460476007682*^9}},ExpressionUUID->"bb02e358-4fa4-428e-afcb-\
5f3933e40e86"],

Cell[CellGroupData[{

Cell[BoxData[
 RowBox[{"Simplify", "[", 
  RowBox[{
   RowBox[{
    RowBox[{"solvemeFull", "/.", "subeq"}], "/.", "equilibrium"}], "/.", 
   RowBox[{"equilPopSizeSol", "[", 
    RowBox[{"[", "2", "]"}], "]"}]}], "]"}]], "Input",
 CellChangeTimes->{{3.781460345153535*^9, 3.7814603578425694`*^9}, {
  3.781884993039777*^9, 3.781884994226761*^9}, {3.8140084876620626`*^9, 
  3.814008488188561*^9}},
 CellLabel->
  "In[1292]:=",ExpressionUUID->"5fd12814-a562-43f7-bff3-28f08afc2467"],

Cell[BoxData[
 RowBox[{"{", 
  RowBox[{"{", 
   RowBox[{"{", 
    RowBox[{"0", ",", "0", ",", "0", ",", "0", ",", "0"}], "}"}], "}"}], 
  "}"}]], "Output",
 CellChangeTimes->{{3.781460334037698*^9, 3.7814603581871443`*^9}, 
   3.781884996207065*^9, 3.781888151904563*^9, 3.781888815502838*^9, 
   3.7819528391580257`*^9, 3.78195291236128*^9, 3.781953910237885*^9, 
   3.7819539443843307`*^9, 3.782130669814548*^9, 3.7830789112925663`*^9, 
   3.785152392831718*^9, 3.7851627262218847`*^9, 3.785164912505734*^9, 
   3.785164954157558*^9, 3.785164993514278*^9, 3.78557243998604*^9, 
   3.785588402949622*^9, 3.789732685214398*^9, 3.790078589989867*^9, 
   3.795174675666205*^9, 3.800007975600398*^9, 3.800268201899416*^9, 
   3.813928155463936*^9, 3.814019811394556*^9, 3.814081332227298*^9, 
   3.814189399423977*^9, 3.8141959633935623`*^9, 3.814196512640952*^9},
 CellLabel->
  "Out[1292]=",ExpressionUUID->"72e30847-6871-4d15-9421-a242db0bbb9d"]
}, Open  ]],

Cell["\<\
Define the \[CurlyPhi] and \[Psi] terms and show these can be used to express \
the within-sex allele frequencies.\
\>", "Text",
 CellChangeTimes->{{3.8000080598283653`*^9, 3.800008145978733*^9}, {
  3.8140813483445797`*^9, 
  3.814081359244545*^9}},ExpressionUUID->"31a4b22f-1b38-4dbb-b93e-\
621a9cd9e860"],

Cell[CellGroupData[{

Cell[BoxData[{
 RowBox[{
  RowBox[{"\[Phi]", " ", "=", " ", 
   RowBox[{"\[Delta]", " ", "-", " ", 
    RowBox[{"(", 
     RowBox[{"sm", "+", 
      RowBox[{"sm", " ", "\[Delta]"}], "+", 
      RowBox[{"h", " ", "sf", " ", 
       RowBox[{"(", 
        RowBox[{"2", "+", "\[Delta]", "-", 
         RowBox[{"sm", " ", 
          RowBox[{"(", 
           RowBox[{"1", "+", "\[Delta]"}], ")"}]}]}], ")"}]}]}], ")"}]}]}], 
  ";"}], "\[IndentingNewLine]", 
 RowBox[{
  RowBox[{"\[CurlyPhi]", "=", " ", 
   RowBox[{
    RowBox[{"sm", " ", 
     RowBox[{"(", 
      RowBox[{"1", "+", "\[Delta]"}], ")"}]}], "-", 
    RowBox[{"(", 
     RowBox[{"\[Delta]", "+", 
      RowBox[{"2", " ", "sf", " ", 
       RowBox[{"(", 
        RowBox[{
         RowBox[{"-", "1"}], "+", "sm"}], ")"}], " ", 
       RowBox[{"(", 
        RowBox[{"1", "+", "\[Delta]"}], ")"}]}], "+", 
      RowBox[{"h", " ", "sf", " ", 
       RowBox[{"(", 
        RowBox[{"2", "+", "\[Delta]", "-", 
         RowBox[{"sm", " ", 
          RowBox[{"(", 
           RowBox[{"1", "+", "\[Delta]"}], ")"}]}]}], ")"}]}]}], ")"}]}]}], 
  ";"}], "\[IndentingNewLine]", 
 RowBox[{
  RowBox[{"pfeq", "  ", "=", " ", 
   RowBox[{
    RowBox[{"\[Phi]", "/", 
     RowBox[{"(", 
      RowBox[{"\[Phi]", "+", "\[CurlyPhi]"}], ")"}]}], "//", 
    "FullSimplify"}]}], ";"}], "\[IndentingNewLine]", 
 RowBox[{
  RowBox[{
   RowBox[{"pfeq", "-", " ", "pf"}], "/.", 
   RowBox[{"equilibrium", "[", 
    RowBox[{"[", "1", "]"}], "]"}]}], " ", "//", 
  "Factor"}], "\[IndentingNewLine]", 
 RowBox[{
  RowBox[{"pmeq", "  ", "=", " ", 
   RowBox[{
    RowBox[{
     RowBox[{"(", 
      RowBox[{"1", "-", "sm"}], ")"}], 
     RowBox[{"\[Phi]", "/", 
      RowBox[{"(", 
       RowBox[{
        RowBox[{
         RowBox[{"(", 
          RowBox[{"1", "-", "sm"}], ")"}], "\[Phi]"}], "+", "\[CurlyPhi]"}], 
       ")"}]}]}], "//", "Simplify"}]}], ";"}], "\[IndentingNewLine]", 
 RowBox[{
  RowBox[{
   RowBox[{"pmeq", " ", "-", " ", "pm"}], "/.", 
   RowBox[{"equilibrium", "[", 
    RowBox[{"[", "1", "]"}], "]"}]}], " ", "//", "Factor"}]}], "Input",
 CellChangeTimes->{{3.785165011572194*^9, 3.7851650578862867`*^9}, {
  3.785165092314415*^9, 3.785165123216474*^9}, {3.785165839522647*^9, 
  3.785165968268564*^9}, {3.785588461811692*^9, 3.7855884676833487`*^9}, {
  3.785588514305647*^9, 3.785588514538514*^9}, {3.800008246803669*^9, 
  3.800008356026331*^9}, {3.800008520562923*^9, 3.80000854999323*^9}},
 CellLabel->
  "In[1293]:=",ExpressionUUID->"76e79208-a384-4c72-9517-ab46e19f04b3"],

Cell[BoxData["0"], "Output",
 CellChangeTimes->{
  3.785572440343376*^9, 3.785588403438594*^9, 3.7855884681264563`*^9, 
   3.785588516159246*^9, 3.789732685580689*^9, 3.790078590392893*^9, 
   3.79517467591718*^9, 3.8000079759268837`*^9, 3.800008276208026*^9, {
   3.800008310167995*^9, 3.800008356897874*^9}, {3.8000085249642057`*^9, 
   3.800008550752894*^9}, 3.800268202153144*^9, 3.813928166782549*^9, 
   3.814019811583646*^9, 3.814081338041605*^9, 3.8141893995826473`*^9, 
   3.8141959635283127`*^9, 3.8141965127469997`*^9},
 CellLabel->
  "Out[1296]=",ExpressionUUID->"ca5b5032-efd0-4446-b419-be905d55a573"],

Cell[BoxData["0"], "Output",
 CellChangeTimes->{
  3.785572440343376*^9, 3.785588403438594*^9, 3.7855884681264563`*^9, 
   3.785588516159246*^9, 3.789732685580689*^9, 3.790078590392893*^9, 
   3.79517467591718*^9, 3.8000079759268837`*^9, 3.800008276208026*^9, {
   3.800008310167995*^9, 3.800008356897874*^9}, {3.8000085249642057`*^9, 
   3.800008550752894*^9}, 3.800268202153144*^9, 3.813928166782549*^9, 
   3.814019811583646*^9, 3.814081338041605*^9, 3.8141893995826473`*^9, 
   3.8141959635283127`*^9, 3.814196512778748*^9},
 CellLabel->
  "Out[1298]=",ExpressionUUID->"6488e1bd-1c6f-4547-bf26-b7b41c73425f"]
}, Open  ]],

Cell["\<\
Then find the equilibrium population size and polymorphism and show it can be \
written with b = b* as in the manuscript\
\>", "Text",
 CellChangeTimes->{{3.800008557765349*^9, 3.800008607425334*^9}, {
  3.800008776745749*^9, 
  3.800008778657819*^9}},ExpressionUUID->"5ff8ff81-da59-4f3f-b306-\
d25ac6466a2d"],

Cell[CellGroupData[{

Cell[BoxData[{
 RowBox[{"Neq", " ", "=", " ", 
  RowBox[{
   RowBox[{"Simplify", "[", 
    RowBox[{"(", 
     RowBox[{
      RowBox[{"(", 
       RowBox[{"femaleNum", "+", "maleNum"}], ")"}], "/.", 
      RowBox[{"equilPopSizeSol", "[", 
       RowBox[{"[", "2", "]"}], "]"}]}], ")"}], "]"}], "//", 
   "Simplify"}]}], "\[IndentingNewLine]", 
 RowBox[{
  RowBox[{"Factor", "[", 
   RowBox[{
    RowBox[{"(", 
     FractionBox[
      RowBox[{"(", 
       RowBox[{
        RowBox[{"b", 
         RowBox[{"(", 
          RowBox[{"1", " ", "+", "  ", 
           RowBox[{"\[Phi]", " ", 
            RowBox[{"pfeq", "/", "2"}]}]}], ")"}], 
         RowBox[{"(", 
          RowBox[{
           RowBox[{"(", 
            RowBox[{"1", "-", "pmeq"}], ")"}], "/", 
           RowBox[{"(", 
            RowBox[{"1", "-", "pfeq"}], ")"}]}], ")"}]}], " ", "-", " ", 
        "2"}], ")"}], 
      RowBox[{" ", 
       RowBox[{"\[Alpha]", " ", "b", 
        RowBox[{"(", 
         RowBox[{"1", "+", 
          RowBox[{"\[Phi]", " ", 
           RowBox[{"pfeq", "/", "2"}]}]}], ")"}], 
        RowBox[{"(", 
         RowBox[{
          RowBox[{"(", 
           RowBox[{"1", "-", "pmeq"}], ")"}], "/", 
          RowBox[{"(", 
           RowBox[{"1", "-", "pfeq"}], ")"}]}], ")"}]}]}]], ")"}], " ", "-", 
    " ", "Neq"}], "]"}], "//", "Simplify"}], "\[IndentingNewLine]", 
 RowBox[{
  RowBox[{"bstar", "=", 
   RowBox[{"Factor", "[", 
    RowBox[{"(", 
     RowBox[{"b", 
      RowBox[{"(", 
       RowBox[{"1", "+", 
        FractionBox[
         RowBox[{"\[Phi]", " ", "pfeq"}], "2"]}], ")"}], 
      RowBox[{"(", 
       FractionBox[
        RowBox[{"1", "-", "pmeq"}], 
        RowBox[{"1", "-", "pfeq"}]], ")"}]}], ")"}], "]"}]}], 
  ";"}], "\[IndentingNewLine]", 
 RowBox[{"Factor", "[", 
  RowBox[{
   FractionBox[
    RowBox[{"bstar", "-", "2"}], 
    RowBox[{"bstar", " ", "\[Alpha]"}]], "-", "Neq"}], "]"}]}], "Input",
 CellChangeTimes->{
  3.8000085763622026`*^9, {3.814189487914071*^9, 3.814189593773863*^9}},
 CellLabel->
  "In[1299]:=",ExpressionUUID->"27c4ce68-c42f-4132-bce1-f9f2f51adf48"],

Cell[BoxData[
 RowBox[{
  RowBox[{"(", 
   RowBox[{
    RowBox[{"b", " ", 
     SuperscriptBox["h", "2"], " ", 
     SuperscriptBox["sf", "2"], " ", 
     SuperscriptBox[
      RowBox[{"(", 
       RowBox[{
        RowBox[{"-", "2"}], "+", "sm", "-", "\[Delta]", "+", 
        RowBox[{"sm", " ", "\[Delta]"}]}], ")"}], "2"]}], "+", 
    RowBox[{
     RowBox[{"(", 
      RowBox[{"sm", "-", "\[Delta]", "+", 
       RowBox[{"sm", " ", "\[Delta]"}]}], ")"}], " ", 
     RowBox[{"(", 
      RowBox[{
       RowBox[{
        RowBox[{"-", "b"}], " ", "\[Delta]"}], "+", 
       RowBox[{"sm", " ", 
        RowBox[{"(", 
         RowBox[{
          RowBox[{"-", "4"}], "+", "b", "+", 
          RowBox[{"b", " ", "\[Delta]"}]}], ")"}]}]}], ")"}]}], "-", 
    RowBox[{"2", " ", "sf", " ", 
     RowBox[{"(", 
      RowBox[{
       RowBox[{
        RowBox[{"-", "4"}], " ", 
        RowBox[{"(", 
         RowBox[{
          RowBox[{"-", "1"}], "+", "sm"}], ")"}], " ", 
        RowBox[{"(", 
         RowBox[{"1", "+", "\[Delta]"}], ")"}]}], "+", 
       RowBox[{"2", " ", "b", " ", 
        RowBox[{"(", 
         RowBox[{
          RowBox[{"-", "1"}], "+", "sm"}], ")"}], " ", 
        RowBox[{"(", 
         RowBox[{"1", "+", "\[Delta]"}], ")"}]}], "-", 
       RowBox[{"2", " ", "h", " ", 
        RowBox[{"(", 
         RowBox[{
          RowBox[{"-", "2"}], "+", "sm"}], ")"}], " ", 
        RowBox[{"(", 
         RowBox[{
          RowBox[{"-", "2"}], "+", "sm", "-", "\[Delta]", "+", 
          RowBox[{"sm", " ", "\[Delta]"}]}], ")"}]}], "+", 
       RowBox[{"b", " ", "h", " ", 
        SuperscriptBox[
         RowBox[{"(", 
          RowBox[{
           RowBox[{"-", "2"}], "+", "sm", "-", "\[Delta]", "+", 
           RowBox[{"sm", " ", "\[Delta]"}]}], ")"}], "2"]}]}], ")"}]}]}], 
   ")"}], "/", 
  RowBox[{"(", 
   RowBox[{"b", " ", "\[Alpha]", " ", 
    RowBox[{"(", 
     RowBox[{
      RowBox[{
       SuperscriptBox["h", "2"], " ", 
       SuperscriptBox["sf", "2"], " ", 
       SuperscriptBox[
        RowBox[{"(", 
         RowBox[{
          RowBox[{"-", "2"}], "+", "sm", "-", "\[Delta]", "+", 
          RowBox[{"sm", " ", "\[Delta]"}]}], ")"}], "2"]}], "+", 
      SuperscriptBox[
       RowBox[{"(", 
        RowBox[{"sm", "-", "\[Delta]", "+", 
         RowBox[{"sm", " ", "\[Delta]"}]}], ")"}], "2"], "-", 
      RowBox[{"2", " ", "sf", " ", 
       RowBox[{"(", 
        RowBox[{
         RowBox[{"2", " ", 
          RowBox[{"(", 
           RowBox[{
            RowBox[{"-", "1"}], "+", "sm"}], ")"}], " ", 
          RowBox[{"(", 
           RowBox[{"1", "+", "\[Delta]"}], ")"}]}], "+", 
         RowBox[{"h", " ", 
          SuperscriptBox[
           RowBox[{"(", 
            RowBox[{
             RowBox[{"-", "2"}], "+", "sm", "-", "\[Delta]", "+", 
             RowBox[{"sm", " ", "\[Delta]"}]}], ")"}], "2"]}]}], ")"}]}]}], 
     ")"}]}], ")"}]}]], "Output",
 CellChangeTimes->{
  3.8141895393379183`*^9, {3.814189590062188*^9, 3.814189594198102*^9}, 
   3.814195963603006*^9, 3.814196512845458*^9},
 CellLabel->
  "Out[1299]=",ExpressionUUID->"dac1b305-824a-4147-b6cf-b4bb658a7b9e"],

Cell[BoxData["0"], "Output",
 CellChangeTimes->{
  3.8141895393379183`*^9, {3.814189590062188*^9, 3.814189594198102*^9}, 
   3.814195963603006*^9, 3.8141965128755493`*^9},
 CellLabel->
  "Out[1300]=",ExpressionUUID->"797da42e-b36e-4881-9932-422c3de6e91d"],

Cell[BoxData["0"], "Output",
 CellChangeTimes->{
  3.8141895393379183`*^9, {3.814189590062188*^9, 3.814189594198102*^9}, 
   3.814195963603006*^9, 3.8141965128762197`*^9},
 CellLabel->
  "Out[1302]=",ExpressionUUID->"dcf1802f-61aa-4082-8057-dc2085b1b51e"]
}, Open  ]],

Cell[TextData[{
 "Now, we show that b* is increased by a factor that is the mean fitness of \
females at the polymorphic equilibrium (pm, pf) relative to the female \
population size without drive (",
 Cell[BoxData[
  FractionBox[
   RowBox[{"b", "-", "2"}], 
   RowBox[{"2", " ", "b", " ", "\[Alpha]"}]]],
  CellChangeTimes->{3.814190738615601*^9},ExpressionUUID->
  "3d6b35f9-3bea-48a7-b024-afff266f0a05"],
 ")."
}], "Text",
 CellChangeTimes->{{3.814190171721497*^9, 3.814190219954615*^9}, {
  3.814190278959606*^9, 3.814190336767393*^9}, {3.814190584791339*^9, 
  3.814190593645845*^9}, {3.8141907113643923`*^9, 3.814190788009817*^9}, {
  3.814190896975758*^9, 
  3.814190912769594*^9}},ExpressionUUID->"61bb9a29-74e9-418c-bb86-\
9b818c625f55"],

Cell[CellGroupData[{

Cell[BoxData[{
 RowBox[{
  RowBox[{"meanF", "=", 
   RowBox[{"Simplify", "[", 
    RowBox[{
     RowBox[{
      RowBox[{
       RowBox[{
        RowBox[{"(", 
         RowBox[{
          RowBox[{"DDfjuveniles", " ", "*", " ", "1"}], "+", 
          RowBox[{"Ddfjuveniles", "*", 
           RowBox[{"(", 
            RowBox[{"1", " ", "-", " ", 
             RowBox[{"h", "*", "sf"}]}], ")"}]}], "+", 
          RowBox[{"ddfjuveniles", "*", 
           RowBox[{"(", 
            RowBox[{"1", " ", "-", " ", "sf"}], ")"}]}]}], ")"}], "/", 
        "femaleNum"}], "/.", "subeq"}], "/.", "equilibrium"}], "/.", 
     "noDrivePopSizeSol"}], "]"}]}], ";"}], "\[IndentingNewLine]", 
 RowBox[{
  RowBox[{
   RowBox[{"b", " ", "meanF"}], "-", "bstar"}], "//", "Simplify"}]}], "Input",
 CellChangeTimes->{{3.8141896448704567`*^9, 3.814189820729373*^9}, {
  3.8141898511822987`*^9, 3.814189879192739*^9}, {3.814189918569771*^9, 
  3.814189942103026*^9}, {3.814189986426216*^9, 3.814190037308394*^9}, {
  3.814190146380966*^9, 3.81419014680739*^9}, {3.814190399968783*^9, 
  3.8141904516626167`*^9}, {3.814190798180624*^9, 3.814190885714787*^9}, {
  3.814190939704075*^9, 3.814190966004036*^9}},
 CellLabel->
  "In[1303]:=",ExpressionUUID->"b212b1df-35b8-4272-996f-97cfee5f7bd3"],

Cell[BoxData[
 RowBox[{"{", 
  RowBox[{"{", "0", "}"}], "}"}]], "Output",
 CellChangeTimes->{{3.814189854842723*^9, 3.814189879641571*^9}, {
   3.814189923555196*^9, 3.8141899423968687`*^9}, {3.8141899884691*^9, 
   3.814190037666664*^9}, 3.814190147700367*^9, {3.814190413440177*^9, 
   3.814190452004284*^9}, {3.814190855232069*^9, 3.8141908863993*^9}, {
   3.8141909400207157`*^9, 3.814190966335051*^9}, 3.814195963816349*^9, 
   3.814196513008129*^9},
 CellLabel->
  "Out[1304]=",ExpressionUUID->"5829f78e-11c2-4920-a939-57a2e567a899"]
}, Open  ]],

Cell["\<\
Finally, we also show that, when drive is fixed, the population size can be \
given by b~, as presented in the text. \
\>", "Text",
 CellChangeTimes->{{3.8141909935330677`*^9, 3.8141910162673264`*^9}, {
  3.81419108775981*^9, 
  3.8141910990239153`*^9}},ExpressionUUID->"819ae32d-3371-438e-83b2-\
ce5a625c27cb"],

Cell[CellGroupData[{

Cell[BoxData[{
 RowBox[{
  RowBox[{"bTilde", "=", 
   RowBox[{"b", 
    RowBox[{"(", 
     RowBox[{"1", "-", "sf"}], ")"}], " ", 
    RowBox[{"(", 
     RowBox[{"1", "+", "\[Delta]"}], ")"}]}]}], ";"}], "\[IndentingNewLine]", 
 RowBox[{"Factor", "[", 
  RowBox[{
   RowBox[{"(", 
    FractionBox[
     RowBox[{"bTilde", "-", "2"}], 
     RowBox[{"bTilde", " ", "\[Alpha]"}]], ")"}], "-", "Nfixed"}], 
  "]"}]}], "Input",
 CellChangeTimes->{{3.7855916876071978`*^9, 3.78559185789961*^9}, 
   3.788865029685322*^9, 3.795174722196233*^9, {3.814191034674275*^9, 
   3.8141910801439447`*^9}},
 CellLabel->
  "In[1305]:=",ExpressionUUID->"2ef5f460-c768-47ac-90cc-5ed41d836f6f"],

Cell[BoxData["0"], "Output",
 CellChangeTimes->{3.814191080432168*^9, 3.81419596382331*^9, 
  3.81419651301431*^9},
 CellLabel->
  "Out[1306]=",ExpressionUUID->"62c3fbaf-d7de-4955-bff1-28e455f6fe54"]
}, Open  ]]
}, Closed]],

Cell[CellGroupData[{

Cell["Stability", "Subsection",
 CellChangeTimes->{{3.7812702047944727`*^9, 
  3.781270206443592*^9}},ExpressionUUID->"c7603756-d652-48a5-8d25-\
7c22c8140a38"],

Cell["\<\
There are at least two immediately apparent equilibria: when drive is absent \
from the population and when drive is fixed in the population. 

We first find the Jacobian for the system:\
\>", "Text",
 CellChangeTimes->{{3.781272256024481*^9, 3.781272395504654*^9}, {
  3.781273708553084*^9, 3.7812737092006273`*^9}, {3.781273897437092*^9, 
  3.781273908742497*^9}, {3.800007455744604*^9, 3.800007456204402*^9}, {
  3.814092010155294*^9, 
  3.814092011347086*^9}},ExpressionUUID->"069fa669-e6f5-414b-8bb6-\
0768dbae7863"],

Cell[BoxData[{
 RowBox[{
  RowBox[{"recursions", "=", 
   RowBox[{"{", 
    RowBox[{
    "Dmprime", ",", " ", "dmprime", ",", " ", "DDfprime", ",", " ", 
     "Ddfprime", ",", " ", "ddfprime"}], "}"}]}], 
  ";"}], "\[IndentingNewLine]", 
 RowBox[{
  RowBox[{"jacob", "=", 
   RowBox[{"Simplify", "[", 
    RowBox[{"Transpose", "[", 
     RowBox[{"{", 
      RowBox[{
       RowBox[{"D", "[", 
        RowBox[{"recursions", ",", "Dm"}], "]"}], ",", " ", 
       RowBox[{"D", "[", 
        RowBox[{"recursions", ",", "dm"}], "]"}], ",", " ", 
       RowBox[{"D", "[", 
        RowBox[{"recursions", ",", " ", "DDf"}], "]"}], ",", " ", 
       RowBox[{"D", "[", 
        RowBox[{"recursions", ",", " ", "Ddf"}], "]"}], ",", " ", 
       RowBox[{"D", "[", 
        RowBox[{"recursions", ",", " ", "ddf"}], "]"}]}], "}"}], "]"}], 
    "]"}]}], ";"}]}], "Input",
 CellChangeTimes->{{3.7812738954655247`*^9, 3.781273895657804*^9}},
 CellLabel->
  "In[1307]:=",ExpressionUUID->"0311a470-b3b5-4128-9aee-344bd1c02d18"],

Cell["\<\
And then we assess the conditions under which the drive-absent and \
drive-fixed equilibria are stable/instable. \
\>", "Text",
 CellChangeTimes->{
  3.8140187547665863`*^9},ExpressionUUID->"849fe3c7-f7a5-4759-a193-\
b19237b95a9c"],

Cell[CellGroupData[{

Cell["drive absent (pm=pf=0) equilibrium", "Subsubsection",
 CellChangeTimes->{{3.781273712670188*^9, 3.7812737328189983`*^9}, 
   3.814018761654243*^9},ExpressionUUID->"79b91767-43e9-45e7-8f2d-\
900ada457e51"],

Cell["\<\
To evaluate the stability of the equilibrium where drive is absent we \
consider the eigenvalues of the Jacobian at this point (substituting pf->0, \
pm->0, and the equilibrium population size without drive). The equilibrium is \
unstable whenever it has an eigenvalue with absolute value > 1.\
\>", "Text",
 CellChangeTimes->{{3.781273918397637*^9, 3.781273991244995*^9}, {
  3.781275775595746*^9, 3.781275807826384*^9}, {3.814003868404478*^9, 
  3.814003889059251*^9}},ExpressionUUID->"bb9328f9-fea8-4cba-ada5-\
68fd7946ad96"],

Cell[CellGroupData[{

Cell[BoxData[{
 RowBox[{
  RowBox[{
   RowBox[{"Simplify", "[", 
    RowBox[{
     RowBox[{
      RowBox[{
       RowBox[{"jacob", "/.", "subeq"}], "/.", 
       RowBox[{"pf", "\[Rule]", "0"}]}], "/.", 
      RowBox[{"pm", "\[Rule]", "0"}]}], "/.", "noDrivePopSizeSol"}], "]"}], 
   "[", 
   RowBox[{"[", "1", "]"}], "]"}], ";"}], "\[IndentingNewLine]", 
 RowBox[{"charpolynomial0", "=", 
  RowBox[{"Factor", "[", 
   RowBox[{"Det", "[", 
    RowBox[{"%", "-", 
     RowBox[{"\[Lambda]", "*", 
      RowBox[{"IdentityMatrix", "[", "5", "]"}]}]}], "]"}], "]"}]}]}], "Input",
 CellChangeTimes->{
  3.781274002989327*^9, {3.813930917830587*^9, 3.813931059531245*^9}, {
   3.814003803361516*^9, 3.814003804854281*^9}, {3.8140085533840113`*^9, 
   3.814008553741354*^9}},
 CellLabel->
  "In[1309]:=",ExpressionUUID->"7f47ae55-1386-43af-8177-ce1b2387ab73"],

Cell[BoxData[
 RowBox[{
  RowBox[{"-", 
   FractionBox["1", "4"]}], " ", 
  SuperscriptBox["\[Lambda]", "2"], " ", 
  RowBox[{"(", 
   RowBox[{
    RowBox[{"-", "4"}], "+", "b", "+", 
    RowBox[{"2", " ", "\[Lambda]"}]}], ")"}], " ", 
  RowBox[{"(", 
   RowBox[{
    RowBox[{"-", "1"}], "+", 
    RowBox[{"h", " ", "sf"}], "+", "sm", "-", 
    RowBox[{"h", " ", "sf", " ", "sm"}], "-", "\[Delta]", "+", 
    RowBox[{"h", " ", "sf", " ", "\[Delta]"}], "+", 
    RowBox[{"sm", " ", "\[Delta]"}], "-", 
    RowBox[{"h", " ", "sf", " ", "sm", " ", "\[Delta]"}], "-", "\[Lambda]", 
    "+", 
    RowBox[{"h", " ", "sf", " ", "\[Lambda]"}], "+", 
    RowBox[{"2", " ", 
     SuperscriptBox["\[Lambda]", "2"]}]}], ")"}]}]], "Output",
 CellChangeTimes->{
  3.7812740033403482`*^9, 3.7814573218417273`*^9, 3.7818848609506083`*^9, 
   3.781952821819541*^9, 3.78195289751086*^9, {3.7819538958219957`*^9, 
   3.781953915448163*^9}, 3.7821306544665728`*^9, 3.782747157952016*^9, 
   3.7830788934301643`*^9, 3.785162683931014*^9, 3.785164973948011*^9, 
   3.789732648885466*^9, 3.795174657109274*^9, 3.799320669052409*^9, 
   3.799340142599029*^9, 3.799756425128694*^9, 3.800007655671279*^9, 
   3.8002681846876783`*^9, 3.813930901799224*^9, {3.8139309343336077`*^9, 
   3.8139310598724957`*^9}, 3.8140037587039423`*^9, 3.814003805149556*^9, 
   3.814081435651245*^9, 3.814189400309782*^9, 3.814195964352592*^9, 
   3.814196513430963*^9},
 CellLabel->
  "Out[1310]=",ExpressionUUID->"1548c55b-67b8-42b5-b844-9a327c3f3c8c"]
}, Open  ]],

Cell[TextData[{
 "The factor ",
 Cell[BoxData[
  RowBox[{
   RowBox[{"-", 
    FractionBox["1", "4"]}], " ", 
   SuperscriptBox["\[Lambda]", "2"], " ", 
   RowBox[{"(", 
    RowBox[{
     RowBox[{"-", "4"}], "+", "b", "+", 
     RowBox[{"2", " ", "\[Lambda]"}]}], ")"}]}]],
  CellChangeTimes->{
   3.7812740033403482`*^9, 3.7814573218417273`*^9, 3.7818848609506083`*^9, 
    3.781952821819541*^9, 3.78195289751086*^9, {3.7819538958219957`*^9, 
    3.781953915448163*^9}, 3.7821306544665728`*^9, 3.782747157952016*^9, 
    3.7830788934301643`*^9, 3.785162683931014*^9, 3.785164973948011*^9, 
    3.789732648885466*^9, 3.795174657109274*^9, 3.799320669052409*^9, 
    3.799340142599029*^9, 3.799756425128694*^9, 3.800007655671279*^9, 
    3.8002681846876783`*^9, 3.813930901799224*^9, {3.8139309343336077`*^9, 
    3.8139310598724957`*^9}, 3.8140037587039423`*^9, 3.814003805149556*^9},
  ExpressionUUID->"31396fd5-6a6b-4b6e-8acd-d50aeddeb136"],
 " gives two 0 eigenvalues and and eigenvalue of ",
 Cell[BoxData[
  FractionBox[
   RowBox[{"4", "-", "b"}], "2"]],
  CellChangeTimes->{3.814003986297804*^9},ExpressionUUID->
  "4f8b776c-b2ae-4d20-8b16-36637e57572d"],
 ", corresponding to the change in overall population size. Thus, we can see \
that the demographic dynamics are orthogonal to the evolutionary dynamics. \n\
\nHere,  we divide through by this factor to simplify the equation and \
evaluate the evolutionary dynamics. We then write the characteristic \
polynomial in the form\n",
 Cell[BoxData[
  RowBox[{
   SuperscriptBox["a\[Lambda]", "2"], "+", "b\[Lambda]", "+", "c"}]],
  CellChangeTimes->{
   3.7812740321927767`*^9, 3.781274073867482*^9, 3.7814285214279013`*^9, 
    3.781457321850852*^9, 3.78188486097983*^9, 3.781952821828101*^9, 
    3.7819528975187283`*^9, {3.781953895876915*^9, 3.7819539154956713`*^9}, 
    3.7821306544745502`*^9, 3.782747157961987*^9, 3.7830788934387407`*^9, 
    3.785162684364028*^9, 3.785164974025779*^9, 3.789732649060177*^9, 
    3.79517465722147*^9, 3.799320669259963*^9, 3.799340142805358*^9, 
    3.799756425312364*^9, 3.800007655751677*^9, 3.80026818474804*^9, 
    3.8139309588718987`*^9, 3.813931061212427*^9, 3.814004119936627*^9},
  ExpressionUUID->"812065ab-c20f-4f95-b025-9f98980df433"],
 " \nfinding the a, b, and c coefficients. "
}], "Text",
 CellChangeTimes->{{3.8140039558834753`*^9, 3.8140040343097057`*^9}, {
  3.8140040782287703`*^9, 3.814004106285927*^9}, {3.814004210438005*^9, 
  3.814004280376747*^9}},ExpressionUUID->"c6b7c149-1d9d-486e-8d79-\
e0b69ffdc7ac"],

Cell[CellGroupData[{

Cell[BoxData[{
 RowBox[{
  RowBox[{"Collect", "[", 
   RowBox[{
    RowBox[{"charpolynomial0", "/", 
     RowBox[{"(", 
      RowBox[{
       RowBox[{"-", 
        FractionBox["1", "4"]}], " ", 
       SuperscriptBox["\[Lambda]", "2"], " ", 
       RowBox[{"(", 
        RowBox[{
         RowBox[{"-", "4"}], "+", "b", "+", 
         RowBox[{"2", " ", "\[Lambda]"}]}], ")"}]}], ")"}]}], ",", 
    "\[Lambda]", ",", "Simplify"}], "]"}], ";"}], "\[IndentingNewLine]", 
 RowBox[{
  RowBox[{"Coefficient", "[", 
   RowBox[{"%", ",", 
    RowBox[{"\[Lambda]", "^", "2"}]}], "]"}], ";"}], "\[IndentingNewLine]", 
 RowBox[{
  RowBox[{"charpolySimpleACoef0", "=", 
   RowBox[{"%%", "/", "%"}]}], " ", 
  RowBox[{"(*", 
   RowBox[{
   "simplify", " ", "so", " ", "that", " ", "the", " ", "a", " ", 
    "coefficient", " ", "is", " ", "1"}], "*)"}]}], "\[IndentingNewLine]", 
 RowBox[{
  RowBox[{"acoef0", "=", 
   RowBox[{"Coefficient", "[", 
    RowBox[{"charpolySimpleACoef0", ",", 
     RowBox[{"\[Lambda]", "^", "2"}]}], "]"}]}], ";"}], "\[IndentingNewLine]", 
 RowBox[{
  RowBox[{"bcoef0", "=", 
   RowBox[{"Coefficient", "[", 
    RowBox[{"charpolySimpleACoef0", ",", "\[Lambda]"}], "]"}]}], 
  ";"}], "\[IndentingNewLine]", 
 RowBox[{
  RowBox[{"ccoef0", "=", 
   RowBox[{
    RowBox[{"charpolySimpleACoef0", " ", "-", " ", 
     RowBox[{"bcoef0", "*", "\[Lambda]"}], "-", 
     RowBox[{"acoef0", "*", 
      RowBox[{"\[Lambda]", "^", "2"}]}]}], " ", "//", " ", "Simplify"}]}], 
  ";"}]}], "Input",
 CellChangeTimes->{{3.7812740703585978`*^9, 3.7812740731784153`*^9}, {
   3.781428516566597*^9, 3.781428520312667*^9}, {3.814003772626279*^9, 
   3.814003773254695*^9}, 3.814004117518854*^9, {3.814004306769434*^9, 
   3.814004317051339*^9}},
 CellLabel->
  "In[1311]:=",ExpressionUUID->"a062c177-c1b5-4aea-89af-f51112f7b4e6"],

Cell[BoxData[
 RowBox[{
  FractionBox["1", "2"], " ", 
  RowBox[{"(", 
   RowBox[{
    RowBox[{
     RowBox[{"-", 
      RowBox[{"(", 
       RowBox[{
        RowBox[{"-", "1"}], "+", 
        RowBox[{"h", " ", "sf"}]}], ")"}]}], " ", 
     RowBox[{"(", 
      RowBox[{
       RowBox[{"-", "1"}], "+", "sm"}], ")"}], " ", 
     RowBox[{"(", 
      RowBox[{"1", "+", "\[Delta]"}], ")"}]}], "+", 
    RowBox[{
     RowBox[{"(", 
      RowBox[{
       RowBox[{"-", "1"}], "+", 
       RowBox[{"h", " ", "sf"}]}], ")"}], " ", "\[Lambda]"}], "+", 
    RowBox[{"2", " ", 
     SuperscriptBox["\[Lambda]", "2"]}]}], ")"}]}]], "Output",
 CellChangeTimes->{
  3.7812740321927767`*^9, 3.781274073867482*^9, 3.7814285214279013`*^9, 
   3.781457321850852*^9, 3.78188486097983*^9, 3.781952821828101*^9, 
   3.7819528975187283`*^9, {3.781953895876915*^9, 3.7819539154956713`*^9}, 
   3.7821306544745502`*^9, 3.782747157961987*^9, 3.7830788934387407`*^9, 
   3.785162684364028*^9, 3.785164974025779*^9, 3.789732649060177*^9, 
   3.79517465722147*^9, 3.799320669259963*^9, 3.799340142805358*^9, 
   3.799756425312364*^9, 3.800007655751677*^9, 3.80026818474804*^9, 
   3.8139309588718987`*^9, 3.813931061212427*^9, 3.814004119936627*^9, 
   3.814081440403721*^9, 3.814189400323086*^9, 3.814195964362994*^9, 
   3.81419651349531*^9},
 CellLabel->
  "Out[1313]=",ExpressionUUID->"ddb9ee80-7091-4e9d-a6fd-550af5402d74"]
}, Open  ]],

Cell["\<\
The discriminant must be non-negative for the eigenvalues to be real\
\>", "Text",
 CellChangeTimes->{{3.781428281916833*^9, 
  3.781428302970292*^9}},ExpressionUUID->"3f84c290-93d1-4128-a2e3-\
b4d2a996e2ab"],

Cell[CellGroupData[{

Cell[BoxData[
 RowBox[{
  RowBox[{
   RowBox[{"bcoef0", "^", "2"}], "-", 
   RowBox[{"4", "acoef0", " ", "ccoef0"}]}], " ", "//", " ", 
  "FullSimplify"}]], "Input",
 CellChangeTimes->{{3.781428313265222*^9, 3.781428316168023*^9}, {
  3.781428426467711*^9, 3.7814285260999413`*^9}},
 CellLabel->
  "In[1317]:=",ExpressionUUID->"bc064fba-63b8-47ae-aa2c-a70d69dcf620"],

Cell[BoxData[
 RowBox[{
  FractionBox["1", "4"], " ", 
  RowBox[{"(", 
   RowBox[{
    RowBox[{"-", "1"}], "+", 
    RowBox[{"h", " ", "sf"}]}], ")"}], " ", 
  RowBox[{"(", 
   RowBox[{
    RowBox[{"-", "1"}], "+", 
    RowBox[{"h", " ", "sf"}], "+", 
    RowBox[{"8", " ", 
     RowBox[{"(", 
      RowBox[{
       RowBox[{"-", "1"}], "+", "sm"}], ")"}], " ", 
     RowBox[{"(", 
      RowBox[{"1", "+", "\[Delta]"}], ")"}]}]}], ")"}]}]], "Output",
 CellChangeTimes->{
  3.781428316942605*^9, {3.781428429373097*^9, 3.781428527133175*^9}, 
   3.7814573219234743`*^9, 3.781884861028933*^9, 3.7819528218734293`*^9, 
   3.781952897577923*^9, {3.781953895926058*^9, 3.781953915547658*^9}, 
   3.782130654518096*^9, 3.7827471580481977`*^9, 3.7830788935329447`*^9, 
   3.785162684709345*^9, 3.785164974150434*^9, 3.789732649230698*^9, 
   3.795174657383437*^9, 3.799320669605383*^9, 3.7993401431414948`*^9, 
   3.799756425497038*^9, 3.80000765591433*^9, 3.80026818485813*^9, 
   3.8139310639623957`*^9, 3.8140041234837303`*^9, 3.814081441766411*^9, 
   3.81418940036903*^9, 3.814195964403165*^9, 3.814196513541647*^9},
 CellLabel->
  "Out[1317]=",ExpressionUUID->"d26856b4-bb3f-4050-a6da-2ac9f7950954"]
}, Open  ]],

Cell[TextData[{
 "We can see that this is always true as the two terms in the product are \
always \[LessEqual] 0.\n\nThe conditions for the above characteristic \
polynomial ",
 Cell[BoxData[
  FormBox["p", TraditionalForm]],ExpressionUUID->
  "34e078e3-2304-422d-b56b-a4b98b1d698e"],
 "  to have roots between -1 and 1 are:\n1. ",
 Cell[BoxData[
  FormBox[
   RowBox[{
    RowBox[{"p", "(", "1", ")"}], " ", ">", " ", "0"}], TraditionalForm]],
  ExpressionUUID->"00646320-05e2-4013-bfbd-752e22d32adb"],
 "\n2. ",
 Cell[BoxData[
  FormBox[
   RowBox[{
    RowBox[{"p", "(", 
     RowBox[{"-", "1"}], ")"}], " ", ">", " ", "0"}], TraditionalForm]],
  ExpressionUUID->"9fdc6528-2117-44b5-8237-d38de3dcadc9"],
 "\n3.  ",
 Cell[BoxData[
  FormBox[
   RowBox[{
    RowBox[{"-", "2"}], " ", "<", " ", "b", " ", "<", " ", "2"}], 
   TraditionalForm]],ExpressionUUID->"f7a04489-da9f-4f9c-896d-49db1e0b2a38"],
 "\nWhen any of these are false, the largest eigenvalue is ",
 Cell[BoxData[
  FormBox[
   RowBox[{">", 
    RowBox[{"1", "\:201a", " "}]}], TraditionalForm]],ExpressionUUID->
  "aec931b3-8545-4140-a197-83a29ea86e37"],
 "and the equilibrium is unstable. Conditions 2 and 3 are always true:"
}], "Text",
 CellChangeTimes->{{3.781428661248453*^9, 3.781428712666779*^9}, {
  3.781428780656464*^9, 3.781428782114583*^9}, {3.781429946730907*^9, 
  3.7814299482572327`*^9}, {3.7814360173472347`*^9, 3.781436101352002*^9}, {
  3.781436149893372*^9, 3.7814362551794662`*^9}, {3.781436330451419*^9, 
  3.781436341934223*^9}, {3.781436393282946*^9, 3.781436444944702*^9}, {
  3.781436680869691*^9, 3.78143669857165*^9}, {3.814004641338129*^9, 
  3.814004642068164*^9}},ExpressionUUID->"1cf4ddfc-43a4-471a-9b4e-\
dfe5df17d9c2"],

Cell[CellGroupData[{

Cell[BoxData[
 RowBox[{"FullSimplify", "[", 
  RowBox[{
   RowBox[{
    RowBox[{"(", 
     RowBox[{"charpolySimpleACoef0", "/.", 
      RowBox[{"\[Lambda]", "\[Rule]", 
       RowBox[{"-", "1"}]}]}], " ", ")"}], ">", " ", "0"}], ",", "  ", 
   RowBox[{"{", 
    RowBox[{
     RowBox[{"1", ">", " ", "\[Delta]", ">", "0"}], ",", 
     RowBox[{"1", ">", "h", ">", "0"}], ",", 
     RowBox[{"1", ">", "sm", ">", "0"}], ",", 
     RowBox[{"0", "<", "sf", "<", "1"}]}], "}"}]}], "]"}]], "Input",
 CellChangeTimes->{{3.781436736869988*^9, 3.781436739183576*^9}},
 CellLabel->
  "In[1318]:=",ExpressionUUID->"ba5dece9-5a47-4e41-9ea8-ddec4b0874db"],

Cell[BoxData["True"], "Output",
 CellChangeTimes->{
  3.781436739697763*^9, 3.78145732216691*^9, 3.781884861062943*^9, 
   3.7819528219341993`*^9, 3.781952897819153*^9, {3.781953895978655*^9, 
   3.781953915596232*^9}, 3.782130654549685*^9, 3.782747158425377*^9, 
   3.7830788938290977`*^9, 3.785162685017118*^9, 3.785164974273959*^9, 
   3.789732649397847*^9, 3.795174657691847*^9, 3.799320669976574*^9, 
   3.799340143764106*^9, 3.799756425685603*^9, 3.8000076560762587`*^9, 
   3.800268185146523*^9, 3.814004596139834*^9, 3.814081444299515*^9, 
   3.814189400417293*^9, 3.814195964452488*^9, 3.814196513599567*^9},
 CellLabel->
  "Out[1318]=",ExpressionUUID->"cb214e2d-51de-436c-bc6b-e11e1e1135d9"]
}, Open  ]],

Cell[CellGroupData[{

Cell[BoxData[
 RowBox[{"FullSimplify", "[", 
  RowBox[{
   RowBox[{
    RowBox[{"-", "2"}], "<", "bcoef0", "<", "2"}], ",", 
   RowBox[{"{", 
    RowBox[{
     RowBox[{"1", ">", " ", "\[Delta]", ">", "0"}], ",", 
     RowBox[{"1", ">", "h", ">", "0"}], ",", 
     RowBox[{"1", ">", "sm", ">", "0"}], ",", 
     RowBox[{"0", "<", "sf", "<", "1"}]}], "}"}]}], "]"}]], "Input",
 CellChangeTimes->{{3.781436745619834*^9, 3.781436768260647*^9}},
 CellLabel->
  "In[1319]:=",ExpressionUUID->"7fde27ef-5868-4523-8056-b480154601d9"],

Cell[BoxData["True"], "Output",
 CellChangeTimes->{
  3.7814367687176857`*^9, 3.781457322173564*^9, 3.781884861071455*^9, 
   3.7819528219793453`*^9, 3.7819528978269367`*^9, {3.7819538959919233`*^9, 
   3.781953915604405*^9}, 3.782130654581544*^9, 3.782747158434576*^9, 
   3.78307889402479*^9, 3.785162685768771*^9, 3.785164974470911*^9, 
   3.789732649484159*^9, 3.795174657881214*^9, 3.7993206700828447`*^9, 
   3.799340144112084*^9, 3.799756425778799*^9, 3.8000076561625147`*^9, 
   3.800268185279215*^9, 3.814004597392589*^9, 3.8140814447417097`*^9, 
   3.8141894004264803`*^9, 3.814195964465844*^9, 3.8141965136058702`*^9},
 CellLabel->
  "Out[1319]=",ExpressionUUID->"81f42865-d0a0-433e-9086-66a6cba4e3da"]
}, Open  ]],

Cell["\<\
But condition 1 fails when the following inequality is true, giving us the \
instability condition.\
\>", "Text",
 CellChangeTimes->{{3.7814367744575577`*^9, 
  3.7814368080369053`*^9}},ExpressionUUID->"ce2389da-627b-495a-8e96-\
9e6424cc0855"],

Cell[CellGroupData[{

Cell[BoxData[
 RowBox[{"unstabConditions0", " ", "=", " ", 
  RowBox[{"FullSimplify", "[", 
   RowBox[{
    RowBox[{
     RowBox[{"(", 
      RowBox[{"charpolySimpleACoef0", "/.", 
       RowBox[{"\[Lambda]", "\[Rule]", "1"}]}], " ", ")"}], "<", " ", "0"}], 
    ",", "  ", 
    RowBox[{"{", 
     RowBox[{
      RowBox[{"1", ">", " ", "\[Delta]", ">", "0"}], ",", 
      RowBox[{"1", ">", "h", ">", "0"}], ",", 
      RowBox[{"1", ">", "sm", ">", "0"}], ",", 
      RowBox[{"0", "<", "sf", "<", "1"}]}], "}"}]}], "]"}]}]], "Input",
 CellChangeTimes->{{3.781429951183529*^9, 3.7814301179474297`*^9}, {
   3.7814302541642017`*^9, 3.781430298190481*^9}, {3.7814303383056297`*^9, 
   3.781430361497563*^9}, {3.7814312736199713`*^9, 3.78143127584548*^9}, {
   3.781436466857931*^9, 3.781436560917033*^9}, {3.781436631602688*^9, 
   3.781436644697918*^9}, 3.8140046082541723`*^9, {3.814004682873187*^9, 
   3.814004713133438*^9}},
 CellLabel->
  "In[1320]:=",ExpressionUUID->"5530f374-81a1-4254-82c7-fd3e53be49c9"],

Cell[BoxData[
 RowBox[{
  RowBox[{"sm", "+", 
   RowBox[{"sm", " ", "\[Delta]"}], "+", 
   RowBox[{"h", " ", "sf", " ", 
    RowBox[{"(", 
     RowBox[{"2", "+", "\[Delta]", "-", 
      RowBox[{"sm", " ", 
       RowBox[{"(", 
        RowBox[{"1", "+", "\[Delta]"}], ")"}]}]}], ")"}]}]}], "<", 
  "\[Delta]"}]], "Output",
 CellChangeTimes->{
  3.7814300190036163`*^9, {3.781430050891747*^9, 3.781430119181625*^9}, {
   3.781430258842821*^9, 3.7814302987538567`*^9}, {3.781430357589197*^9, 
   3.7814303619226294`*^9}, 3.781431276347818*^9, {3.781436471134864*^9, 
   3.7814365067294188`*^9}, 3.781436668610888*^9, 3.7814573222715*^9, 
   3.781884861204401*^9, 3.781952822089045*^9, 3.781952897921483*^9, {
   3.781953896105276*^9, 3.781953915747797*^9}, 3.782130654684663*^9, 
   3.782747158540249*^9, 3.783078894199912*^9, 3.7851626859809427`*^9, 
   3.785164974645007*^9, 3.789732649767761*^9, 3.795174658046834*^9, 
   3.799320670294146*^9, 3.7993401443157*^9, 3.79975642605756*^9, 
   3.800007656424817*^9, 3.800268185436696*^9, 3.8139311136920567`*^9, {
   3.814004601006237*^9, 3.8140046096271353`*^9}, {3.814004683951476*^9, 
   3.814004713521501*^9}, 3.814081445877571*^9, 3.814189400591201*^9, 
   3.814195964565126*^9, 3.81419651370522*^9},
 CellLabel->
  "Out[1320]=",ExpressionUUID->"669ee6e1-5491-45d7-bae6-5675aaeb1f83"]
}, Open  ]],

Cell["which can be re-written using the w fitness notation", "Text",
 CellChangeTimes->{{3.814004650674572*^9, 
  3.814004710715838*^9}},ExpressionUUID->"a7fe70a1-d54b-44b0-8921-\
4c0b2d57c4b4"],

Cell[CellGroupData[{

Cell[BoxData[
 RowBox[{"Simplify", "[", 
  RowBox[{"unstabConditions0", ",", " ", 
   RowBox[{"{", 
    RowBox[{
     RowBox[{"wXdY", " ", "\[Equal]", " ", 
      RowBox[{"1", " ", "-", " ", "sm"}]}], ",", 
     RowBox[{"wXdX", " ", "\[Equal]", " ", 
      RowBox[{"1", " ", "-", " ", 
       RowBox[{"h", " ", "sf"}]}]}], ",", 
     RowBox[{"wXdXd", " ", "\[Equal]", " ", 
      RowBox[{"1", " ", "-", " ", "sf"}]}]}], "}"}]}], "]"}]], "Input",
 CellChangeTimes->{{3.782747173005354*^9, 3.782747212585889*^9}, {
  3.782748801098444*^9, 3.7827488122111607`*^9}, {3.783078875883896*^9, 
  3.783078876006201*^9}},
 CellLabel->
  "In[1321]:=",ExpressionUUID->"b37fc450-b899-412b-9f90-3bbcfa772767"],

Cell[BoxData[
 RowBox[{
  RowBox[{"wXdX", "+", 
   RowBox[{"wXdX", " ", "wXdY", " ", 
    RowBox[{"(", 
     RowBox[{"1", "+", "\[Delta]"}], ")"}]}]}], ">", "2"}]], "Output",
 CellChangeTimes->{{3.7827471930133467`*^9, 3.782747213122994*^9}, {
   3.782748802357192*^9, 3.782748813081629*^9}, {3.7830788773278503`*^9, 
   3.783078894293872*^9}, 3.78516268619658*^9, 3.7851649747693663`*^9, 
   3.789732650076954*^9, 3.795174658156262*^9, 3.799320670556473*^9, 
   3.799340144519253*^9, 3.799756426506791*^9, 3.8000076569522038`*^9, 
   3.800268185528966*^9, 3.814004612665675*^9, 3.8140047147797937`*^9, 
   3.81408144704889*^9, 3.8141894006410093`*^9, 3.814195964607699*^9, 
   3.814196513752049*^9},
 CellLabel->
  "Out[1321]=",ExpressionUUID->"edce6e00-2e91-4b7c-906f-fb16ad73cca3"]
}, Open  ]]
}, Closed]],

Cell[CellGroupData[{

Cell["drive fixed (pm=pf=1) equilibrium", "Subsubsection",
 CellChangeTimes->{{3.781273735316922*^9, 3.781273740747805*^9}, 
   3.814018765219983*^9},ExpressionUUID->"532130bb-df22-432d-be64-\
3fff631f92c5"],

Cell["\<\
We proceed similarly to before, but now considering the other equilibrium:\
\>", "Text",
 CellChangeTimes->{{3.7814369207715807`*^9, 
  3.781436938486001*^9}},ExpressionUUID->"27fb58c4-df16-4b7d-8d6e-\
ff8caf4127a2"],

Cell[CellGroupData[{

Cell[BoxData[{
 RowBox[{
  RowBox[{
   RowBox[{"Simplify", "[", 
    RowBox[{
     RowBox[{
      RowBox[{
       RowBox[{"jacob", "/.", "subeq"}], "/.", 
       RowBox[{"pf", "\[Rule]", "1"}]}], "/.", 
      RowBox[{"pm", "\[Rule]", "1"}]}], "/.", "fixedDrivePopSizeSol"}], "]"}],
    "[", 
   RowBox[{"[", "1", "]"}], "]"}], ";"}], "\[IndentingNewLine]", 
 RowBox[{"charpolynomial1", "=", 
  RowBox[{"Factor", "[", 
   RowBox[{"Det", "[", 
    RowBox[{"%", "-", 
     RowBox[{"\[Lambda]", "*", 
      RowBox[{"IdentityMatrix", "[", "5", "]"}]}]}], "]"}], "]"}]}]}], "Input",
 CellChangeTimes->{{3.814004729064748*^9, 3.814004743901525*^9}, {
  3.8140047795551653`*^9, 3.814004791431684*^9}, {3.814005039784062*^9, 
  3.814005043586812*^9}, {3.814008492634818*^9, 3.814008493127555*^9}},
 CellLabel->
  "In[1322]:=",ExpressionUUID->"e6b57997-0174-4c54-ae73-1a8b8e77e142"],

Cell[BoxData[
 RowBox[{
  FractionBox["1", 
   RowBox[{"4", " ", 
    RowBox[{"(", 
     RowBox[{
      RowBox[{"-", "1"}], "+", "sf"}], ")"}], " ", 
    RowBox[{"(", 
     RowBox[{
      RowBox[{"-", "1"}], "+", "sm"}], ")"}], " ", 
    RowBox[{"(", 
     RowBox[{"1", "+", "\[Delta]"}], ")"}]}]], 
  RowBox[{
   RowBox[{"(", 
    RowBox[{"4", "-", "b", "+", 
     RowBox[{"b", " ", "sf"}], "-", 
     RowBox[{"b", " ", "\[Delta]"}], "+", 
     RowBox[{"b", " ", "sf", " ", "\[Delta]"}], "-", 
     RowBox[{"2", " ", "\[Lambda]"}]}], ")"}], " ", 
   SuperscriptBox["\[Lambda]", "2"], " ", 
   RowBox[{"(", 
    RowBox[{
     RowBox[{"-", "1"}], "+", 
     RowBox[{"h", " ", "sf"}], "-", "\[Lambda]", "+", 
     RowBox[{"h", " ", "sf", " ", "\[Lambda]"}], "+", 
     RowBox[{"sm", " ", "\[Lambda]"}], "-", 
     RowBox[{"h", " ", "sf", " ", "sm", " ", "\[Lambda]"}], "-", 
     RowBox[{"\[Delta]", " ", "\[Lambda]"}], "+", 
     RowBox[{"h", " ", "sf", " ", "\[Delta]", " ", "\[Lambda]"}], "+", 
     RowBox[{"sm", " ", "\[Delta]", " ", "\[Lambda]"}], "-", 
     RowBox[{"h", " ", "sf", " ", "sm", " ", "\[Delta]", " ", "\[Lambda]"}], 
     "+", 
     RowBox[{"2", " ", 
      SuperscriptBox["\[Lambda]", "2"]}], "-", 
     RowBox[{"2", " ", "sf", " ", 
      SuperscriptBox["\[Lambda]", "2"]}], "-", 
     RowBox[{"2", " ", "sm", " ", 
      SuperscriptBox["\[Lambda]", "2"]}], "+", 
     RowBox[{"2", " ", "sf", " ", "sm", " ", 
      SuperscriptBox["\[Lambda]", "2"]}], "+", 
     RowBox[{"2", " ", "\[Delta]", " ", 
      SuperscriptBox["\[Lambda]", "2"]}], "-", 
     RowBox[{"2", " ", "sf", " ", "\[Delta]", " ", 
      SuperscriptBox["\[Lambda]", "2"]}], "-", 
     RowBox[{"2", " ", "sm", " ", "\[Delta]", " ", 
      SuperscriptBox["\[Lambda]", "2"]}], "+", 
     RowBox[{"2", " ", "sf", " ", "sm", " ", "\[Delta]", " ", 
      SuperscriptBox["\[Lambda]", "2"]}]}], ")"}]}]}]], "Output",
 CellChangeTimes->{{3.814004786393588*^9, 3.814004791710847*^9}, 
   3.8140050447489643`*^9, 3.814005210911131*^9, 3.8140814605227623`*^9, 
   3.8141894010039062`*^9, 3.8141959649253273`*^9, 3.814196514063834*^9},
 CellLabel->
  "Out[1323]=",ExpressionUUID->"14349bd1-4d87-4bac-9dec-516f8ee4fa33"]
}, Open  ]],

Cell[TextData[{
 "The factor ",
 Cell[BoxData[
  FractionBox[
   RowBox[{
    RowBox[{"(", 
     RowBox[{"4", "-", "b", "+", 
      RowBox[{"b", " ", "sf"}], "-", 
      RowBox[{"b", " ", "\[Delta]"}], "+", 
      RowBox[{"b", " ", "sf", " ", "\[Delta]"}], "-", 
      RowBox[{"2", " ", "\[Lambda]"}]}], ")"}], " ", 
    SuperscriptBox["\[Lambda]", "2"], " "}], 
   RowBox[{"4", " ", 
    RowBox[{"(", 
     RowBox[{
      RowBox[{"-", "1"}], "+", "sf"}], ")"}], " ", 
    RowBox[{"(", 
     RowBox[{
      RowBox[{"-", "1"}], "+", "sm"}], ")"}], " ", 
    RowBox[{"(", 
     RowBox[{"1", "+", "\[Delta]"}], ")"}]}]]],
  CellChangeTimes->{
   3.7812740033403482`*^9, 3.7814573218417273`*^9, 3.7818848609506083`*^9, 
    3.781952821819541*^9, 3.78195289751086*^9, {3.7819538958219957`*^9, 
    3.781953915448163*^9}, 3.7821306544665728`*^9, 3.782747157952016*^9, 
    3.7830788934301643`*^9, 3.785162683931014*^9, 3.785164973948011*^9, 
    3.789732648885466*^9, 3.795174657109274*^9, 3.799320669052409*^9, 
    3.799340142599029*^9, 3.799756425128694*^9, 3.800007655671279*^9, 
    3.8002681846876783`*^9, 3.813930901799224*^9, {3.8139309343336077`*^9, 
    3.8139310598724957`*^9}, 3.8140037587039423`*^9, 3.814003805149556*^9},
  ExpressionUUID->"f0450e44-f8c2-4998-8163-46a32703ac33"],
 " gives two 0 eigenvalues and and eigenvalue of ",
 Cell[BoxData[
  RowBox[{"2", "+", 
   RowBox[{
    FractionBox["1", "2"], " ", "b", " ", 
    RowBox[{"(", 
     RowBox[{
      RowBox[{"-", "1"}], "+", "sf"}], ")"}], " ", 
    RowBox[{"(", 
     RowBox[{"1", "+", "\[Delta]"}], ")"}]}]}]],
  CellChangeTimes->{3.814003986297804*^9},ExpressionUUID->
  "6df63515-868a-41a0-bc99-34f7f0a4f844"],
 ", corresponding to the stability of the ecological equilibrium population \
size. Thus, we can see that the demographic dynamics are orthogonal to the \
evolutionary dynamics. \n\nHere,  we divide through by this factor to \
simplify the equation and evaluate the evolutionary dynamics. We then write \
the characteristic polynomial in the form\n",
 Cell[BoxData[
  RowBox[{
   SuperscriptBox["a\[Lambda]", "2"], "+", "b\[Lambda]", "+", "c"}]],
  CellChangeTimes->{
   3.7812740321927767`*^9, 3.781274073867482*^9, 3.7814285214279013`*^9, 
    3.781457321850852*^9, 3.78188486097983*^9, 3.781952821828101*^9, 
    3.7819528975187283`*^9, {3.781953895876915*^9, 3.7819539154956713`*^9}, 
    3.7821306544745502`*^9, 3.782747157961987*^9, 3.7830788934387407`*^9, 
    3.785162684364028*^9, 3.785164974025779*^9, 3.789732649060177*^9, 
    3.79517465722147*^9, 3.799320669259963*^9, 3.799340142805358*^9, 
    3.799756425312364*^9, 3.800007655751677*^9, 3.80026818474804*^9, 
    3.8139309588718987`*^9, 3.813931061212427*^9, 3.814004119936627*^9},
  ExpressionUUID->"fb6a3c2f-e0b2-4314-881c-853754ff0d06"],
 " \nfinding the a, b, and c coefficients. "
}], "Text",
 CellChangeTimes->{{3.814004985097933*^9, 3.814004991560975*^9}, {
  3.814005062086405*^9, 3.814005085289956*^9}, {3.814005142323441*^9, 
  3.8140051616191607`*^9}},ExpressionUUID->"8cc660ae-b589-4086-aacc-\
522dd5b2a3cf"],

Cell[CellGroupData[{

Cell[BoxData[{
 RowBox[{"Simplify", "[", 
  RowBox[{"charpolynomial1", "/", 
   RowBox[{"(", 
    FractionBox[
     RowBox[{
      RowBox[{"(", 
       RowBox[{"4", "-", "b", "+", 
        RowBox[{"b", " ", "sf"}], "-", 
        RowBox[{"b", " ", "\[Delta]"}], "+", 
        RowBox[{"b", " ", "sf", " ", "\[Delta]"}], "-", 
        RowBox[{"2", " ", "\[Lambda]"}]}], ")"}], " ", 
      SuperscriptBox["\[Lambda]", "2"], " "}], 
     RowBox[{"4", " ", 
      RowBox[{"(", 
       RowBox[{
        RowBox[{"-", "1"}], "+", "sf"}], ")"}], " ", 
      RowBox[{"(", 
       RowBox[{
        RowBox[{"-", "1"}], "+", "sm"}], ")"}], " ", 
      RowBox[{"(", 
       RowBox[{"1", "+", "\[Delta]"}], ")"}]}]], ")"}]}], 
  "]"}], "\[IndentingNewLine]", 
 RowBox[{"Collect", "[", 
  RowBox[{"%", ",", "\[Lambda]", ",", "Simplify"}], "]"}]}], "Input",
 CellChangeTimes->{{3.814005280882255*^9, 3.814005284996513*^9}},
 CellLabel->
  "In[1324]:=",ExpressionUUID->"e5f02f23-dcee-4bc6-91ee-8d5917ca99af"],

Cell[BoxData[
 RowBox[{
  RowBox[{"-", "1"}], "+", 
  RowBox[{
   RowBox[{"(", 
    RowBox[{
     RowBox[{"-", "1"}], "+", "sm"}], ")"}], " ", 
   RowBox[{"(", 
    RowBox[{"1", "+", "\[Delta]"}], ")"}], " ", "\[Lambda]"}], "+", 
  RowBox[{"2", " ", 
   RowBox[{"(", 
    RowBox[{
     RowBox[{"-", "1"}], "+", "sf"}], ")"}], " ", 
   RowBox[{"(", 
    RowBox[{
     RowBox[{"-", "1"}], "+", "sm"}], ")"}], " ", 
   RowBox[{"(", 
    RowBox[{"1", "+", "\[Delta]"}], ")"}], " ", 
   SuperscriptBox["\[Lambda]", "2"]}], "+", 
  RowBox[{"h", " ", 
   RowBox[{"(", 
    RowBox[{"sf", "-", 
     RowBox[{"sf", " ", 
      RowBox[{"(", 
       RowBox[{
        RowBox[{"-", "1"}], "+", "sm"}], ")"}], " ", 
      RowBox[{"(", 
       RowBox[{"1", "+", "\[Delta]"}], ")"}], " ", "\[Lambda]"}]}], 
    ")"}]}]}]], "Output",
 CellChangeTimes->{{3.814005268764485*^9, 3.814005285448605*^9}, 
   3.814081462523357*^9, 3.814189401040678*^9, 3.814195964969289*^9, 
   3.814196514110498*^9},
 CellLabel->
  "Out[1324]=",ExpressionUUID->"e26f52ca-46cb-4df1-b9cf-e718b0ae0acc"],

Cell[BoxData[
 RowBox[{
  RowBox[{"-", "1"}], "+", 
  RowBox[{"h", " ", "sf"}], "+", 
  RowBox[{
   RowBox[{"(", 
    RowBox[{"1", "-", 
     RowBox[{"h", " ", "sf"}]}], ")"}], " ", 
   RowBox[{"(", 
    RowBox[{
     RowBox[{"-", "1"}], "+", "sm"}], ")"}], " ", 
   RowBox[{"(", 
    RowBox[{"1", "+", "\[Delta]"}], ")"}], " ", "\[Lambda]"}], "+", 
  RowBox[{"2", " ", 
   RowBox[{"(", 
    RowBox[{
     RowBox[{"-", "1"}], "+", "sf"}], ")"}], " ", 
   RowBox[{"(", 
    RowBox[{
     RowBox[{"-", "1"}], "+", "sm"}], ")"}], " ", 
   RowBox[{"(", 
    RowBox[{"1", "+", "\[Delta]"}], ")"}], " ", 
   SuperscriptBox["\[Lambda]", "2"]}]}]], "Output",
 CellChangeTimes->{{3.814005268764485*^9, 3.814005285448605*^9}, 
   3.814081462523357*^9, 3.814189401040678*^9, 3.814195964969289*^9, 
   3.814196514111409*^9},
 CellLabel->
  "Out[1325]=",ExpressionUUID->"5fe05b59-72a1-4ede-a803-68b8ba53b75b"]
}, Open  ]],

Cell[CellGroupData[{

Cell[BoxData[{
 RowBox[{
  RowBox[{"Simplify", "[", 
   RowBox[{"charpolynomial1", "/", 
    RowBox[{"(", 
     FractionBox[
      RowBox[{
       RowBox[{"(", 
        RowBox[{"4", "-", "b", "+", 
         RowBox[{"b", " ", "sf"}], "-", 
         RowBox[{"b", " ", "\[Delta]"}], "+", 
         RowBox[{"b", " ", "sf", " ", "\[Delta]"}], "-", 
         RowBox[{"2", " ", "\[Lambda]"}]}], ")"}], " ", 
       SuperscriptBox["\[Lambda]", "2"], " "}], 
      RowBox[{"4", " ", 
       RowBox[{"(", 
        RowBox[{
         RowBox[{"-", "1"}], "+", "sf"}], ")"}], " ", 
       RowBox[{"(", 
        RowBox[{
         RowBox[{"-", "1"}], "+", "sm"}], ")"}], " ", 
       RowBox[{"(", 
        RowBox[{"1", "+", "\[Delta]"}], ")"}]}]], ")"}]}], "]"}], 
  ";"}], "\[IndentingNewLine]", 
 RowBox[{
  RowBox[{"Collect", "[", 
   RowBox[{"%", ",", "\[Lambda]", ",", "Simplify"}], "]"}], 
  ";"}], "\[IndentingNewLine]", 
 RowBox[{
  RowBox[{"Coefficient", "[", 
   RowBox[{"%", ",", 
    RowBox[{"\[Lambda]", "^", "2"}]}], "]"}], ";"}], "\[IndentingNewLine]", 
 RowBox[{"charpolySimpleACoef1", "=", 
  RowBox[{"Collect", "[", 
   RowBox[{
    RowBox[{"%%", "/", "%"}], ",", "\[Lambda]", ",", "Simplify"}], 
   "]"}]}], "\[IndentingNewLine]", 
 RowBox[{
  RowBox[{"acoef1", "=", 
   RowBox[{"Coefficient", "[", 
    RowBox[{"charpolySimpleACoef1", ",", 
     RowBox[{"\[Lambda]", "^", "2"}]}], "]"}]}], ";"}], "\[IndentingNewLine]", 
 RowBox[{
  RowBox[{"bcoef1", "=", 
   RowBox[{"Coefficient", "[", 
    RowBox[{"charpolySimpleACoef1", ",", "\[Lambda]"}], "]"}]}], 
  ";"}], "\[IndentingNewLine]", 
 RowBox[{
  RowBox[{"ccoef1", "=", 
   RowBox[{"charpolySimpleACoef1", "-", " ", 
    RowBox[{"bcoef1", "*", "\[Lambda]"}], "-", 
    RowBox[{"acoef1", "*", 
     RowBox[{"\[Lambda]", "^", "2"}]}]}]}], ";"}]}], "Input",
 CellChangeTimes->{{3.814005188468329*^9, 3.814005191684287*^9}, {
  3.814005253330809*^9, 3.814005259347432*^9}, {3.8140052975628242`*^9, 
  3.8140053332696457`*^9}},
 CellLabel->
  "In[1326]:=",ExpressionUUID->"4f2268e3-8b21-42ca-9c21-5f26150d9928"],

Cell[BoxData[
 RowBox[{
  FractionBox[
   RowBox[{
    RowBox[{"-", "1"}], "+", 
    RowBox[{"h", " ", "sf"}]}], 
   RowBox[{"2", " ", 
    RowBox[{"(", 
     RowBox[{
      RowBox[{"-", "1"}], "+", "sf"}], ")"}], " ", 
    RowBox[{"(", 
     RowBox[{
      RowBox[{"-", "1"}], "+", "sm"}], ")"}], " ", 
    RowBox[{"(", 
     RowBox[{"1", "+", "\[Delta]"}], ")"}]}]], "+", 
  FractionBox[
   RowBox[{
    RowBox[{"(", 
     RowBox[{"1", "-", 
      RowBox[{"h", " ", "sf"}]}], ")"}], " ", "\[Lambda]"}], 
   RowBox[{"2", " ", 
    RowBox[{"(", 
     RowBox[{
      RowBox[{"-", "1"}], "+", "sf"}], ")"}]}]], "+", 
  SuperscriptBox["\[Lambda]", "2"]}]], "Output",
 CellChangeTimes->{3.81400519422432*^9, 3.814005259847539*^9, 
  3.8140053004626207`*^9, 3.814005333624386*^9, 3.814081463662334*^9, 
  3.814189401055848*^9, 3.8141959649815197`*^9, 3.814196514120184*^9},
 CellLabel->
  "Out[1329]=",ExpressionUUID->"f7de4613-1dc1-4969-b75c-fda2256b921f"]
}, Open  ]],

Cell["\<\
The discriminant is nonnegative and so the eigenvalues are real:\
\>", "Text",
 CellChangeTimes->{{3.7814370117088013`*^9, 3.7814370178709927`*^9}, {
  3.7814370976392593`*^9, 
  3.781437109782298*^9}},ExpressionUUID->"f9cb2b4e-b36a-47ac-9f6c-\
6aabd0033d26"],

Cell[CellGroupData[{

Cell[BoxData[
 RowBox[{
  RowBox[{"bcoef1", "^", "2"}], "-", 
  RowBox[{"4", "acoef1", " ", "ccoef1"}]}]], "Input",
 CellLabel->
  "In[1333]:=",ExpressionUUID->"47a59791-140b-49c7-ad27-d57f3a116d92"],

Cell[BoxData[
 RowBox[{
  FractionBox[
   SuperscriptBox[
    RowBox[{"(", 
     RowBox[{"1", "-", 
      RowBox[{"h", " ", "sf"}]}], ")"}], "2"], 
   RowBox[{"4", " ", 
    SuperscriptBox[
     RowBox[{"(", 
      RowBox[{
       RowBox[{"-", "1"}], "+", "sf"}], ")"}], "2"]}]], "-", 
  FractionBox[
   RowBox[{"2", " ", 
    RowBox[{"(", 
     RowBox[{
      RowBox[{"-", "1"}], "+", 
      RowBox[{"h", " ", "sf"}]}], ")"}]}], 
   RowBox[{
    RowBox[{"(", 
     RowBox[{
      RowBox[{"-", "1"}], "+", "sf"}], ")"}], " ", 
    RowBox[{"(", 
     RowBox[{
      RowBox[{"-", "1"}], "+", "sm"}], ")"}], " ", 
    RowBox[{"(", 
     RowBox[{"1", "+", "\[Delta]"}], ")"}]}]]}]], "Output",
 CellChangeTimes->{3.81400537457533*^9, 3.81408146557857*^9, 
  3.814189401089308*^9, 3.814195965024002*^9, 3.8141965141679697`*^9},
 CellLabel->
  "Out[1333]=",ExpressionUUID->"fdfd170c-057e-4e00-84ac-17c8422a404d"]
}, Open  ]],

Cell[TextData[{
 "The conditions for the above characteristic polynomial ",
 Cell[BoxData[
  FormBox["p", TraditionalForm]],ExpressionUUID->
  "78b037a2-7d51-4c17-b3e4-906ac4e9a748"],
 "  to have roots between -1 and 1 are:\n1. ",
 Cell[BoxData[
  FormBox[
   RowBox[{
    RowBox[{"p", "(", "1", ")"}], " ", ">", " ", "0"}], TraditionalForm]],
  ExpressionUUID->"2f3770b3-9338-4e60-b602-37c0494df127"],
 "\n2. ",
 Cell[BoxData[
  FormBox[
   RowBox[{
    RowBox[{"p", "(", 
     RowBox[{"-", "1"}], ")"}], " ", ">", " ", "0"}], TraditionalForm]],
  ExpressionUUID->"ba8ca884-2a2f-4d52-81bc-9f514af16708"],
 "\n3.  ",
 Cell[BoxData[
  FormBox[
   RowBox[{
    RowBox[{"-", "2"}], " ", "<", " ", "b", " "}], TraditionalForm]],
  ExpressionUUID->"3f97142f-3c14-4977-87af-b720f5590eb5"],
 "\n4.  ",
 Cell[BoxData[
  FormBox[
   RowBox[{"b", " ", "<", " ", "2", " "}], TraditionalForm]],ExpressionUUID->
  "c56727ab-21a7-487d-b455-8d61f4f242d6"],
 "\nWhen any of these are false, the largest eigenvalue is ",
 Cell[BoxData[
  FormBox[
   RowBox[{">", 
    RowBox[{"1", "\:201a", " "}]}], TraditionalForm]],ExpressionUUID->
  "be21dc3f-b8cf-41b3-b539-aaeaca5f04c2"],
 "and the equilibrium is unstable. \n\nNow checking these conditions for \
instability by reversing the inequalities required for stability"
}], "Text",
 CellChangeTimes->{{3.7814371420798693`*^9, 3.781437152698497*^9}, {
  3.814005459930065*^9, 
  3.814005579369294*^9}},ExpressionUUID->"ea849c1f-d447-44c8-a831-\
dda615a758e0"],

Cell[CellGroupData[{

Cell[BoxData[{
 RowBox[{"r1", " ", "=", " ", 
  RowBox[{"FullSimplify", "[", 
   RowBox[{
    RowBox[{
     RowBox[{"(", 
      RowBox[{"charpolySimpleACoef1", "/.", 
       RowBox[{"\[Lambda]", "\[Rule]", "1"}]}], " ", ")"}], "<", " ", "0"}], 
    ",", "  ", 
    RowBox[{"{", 
     RowBox[{
      RowBox[{"1", ">", " ", "\[Delta]", ">", "0"}], ",", 
      RowBox[{"1", ">", "h", ">", "0"}], ",", 
      RowBox[{"1", ">", "sm", ">", "0"}], ",", 
      RowBox[{"0", "<", "sf", "<", "1"}]}], "}"}]}], 
   "]"}]}], "\[IndentingNewLine]", 
 RowBox[{"r2", " ", "=", 
  RowBox[{"FullSimplify", "[", 
   RowBox[{
    RowBox[{
     RowBox[{"(", 
      RowBox[{"charpolySimpleACoef1", "/.", 
       RowBox[{"\[Lambda]", "\[Rule]", 
        RowBox[{"-", "1"}]}]}], " ", ")"}], "<", " ", "0"}], ",", "  ", 
    RowBox[{"{", 
     RowBox[{
      RowBox[{"1", ">", " ", "\[Delta]", ">", "0"}], ",", 
      RowBox[{"1", ">", "h", ">", "0"}], ",", 
      RowBox[{"1", ">", "sm", ">", "0"}], ",", 
      RowBox[{"0", "<", "sf", "<", "1"}]}], "}"}]}], 
   "]"}]}], "\[IndentingNewLine]", 
 RowBox[{"r3", "=", 
  RowBox[{"FullSimplify", "[", 
   RowBox[{
    RowBox[{"bcoef1", "<", 
     RowBox[{"-", "2"}]}], ",", 
    RowBox[{"{", 
     RowBox[{
      RowBox[{"1", ">", " ", "\[Delta]", ">", "0"}], ",", 
      RowBox[{"1", ">", "h", ">", "0"}], ",", 
      RowBox[{"1", ">", "sm", ">", "0"}], ",", 
      RowBox[{"0", "<", "sf", "<", "1"}]}], "}"}]}], 
   "]"}]}], "\[IndentingNewLine]", 
 RowBox[{"r4", "=", 
  RowBox[{"FullSimplify", "[", 
   RowBox[{
    RowBox[{"bcoef1", ">", "2"}], ",", 
    RowBox[{"{", 
     RowBox[{
      RowBox[{"1", ">", " ", "\[Delta]", ">", "0"}], ",", 
      RowBox[{"1", ">", "h", ">", "0"}], ",", 
      RowBox[{"1", ">", "sm", ">", "0"}], ",", 
      RowBox[{"0", "<", "sf", "<", "1"}]}], "}"}]}], "]"}]}]}], "Input",
 CellChangeTimes->{{3.781437173950416*^9, 3.78143720186456*^9}, {
  3.781437293015765*^9, 3.781437392444491*^9}, {3.781437548946312*^9, 
  3.781437594361197*^9}, {3.781439033702999*^9, 3.781439042554227*^9}, {
  3.7814390879120607`*^9, 3.781439133547997*^9}, {3.7814394461550627`*^9, 
  3.78143945760787*^9}},
 CellLabel->
  "In[1334]:=",ExpressionUUID->"6851f3e7-d9e9-4279-9edf-bd03416640c2"],

Cell[BoxData[
 RowBox[{
  RowBox[{"\[Delta]", "+", 
   RowBox[{"2", " ", "sf", " ", 
    RowBox[{"(", 
     RowBox[{
      RowBox[{"-", "1"}], "+", "sm"}], ")"}], " ", 
    RowBox[{"(", 
     RowBox[{"1", "+", "\[Delta]"}], ")"}]}], "+", 
   RowBox[{"h", " ", "sf", " ", 
    RowBox[{"(", 
     RowBox[{"2", "+", "\[Delta]", "-", 
      RowBox[{"sm", " ", 
       RowBox[{"(", 
        RowBox[{"1", "+", "\[Delta]"}], ")"}]}]}], ")"}]}]}], "<", 
  RowBox[{"sm", " ", 
   RowBox[{"(", 
    RowBox[{"1", "+", "\[Delta]"}], ")"}]}]}]], "Output",
 CellChangeTimes->{{3.781437175151822*^9, 3.781437202530854*^9}, {
   3.781437295782474*^9, 3.781437352236356*^9}, 3.7814374035892963`*^9, 
   3.781437613171399*^9, 3.781439043535357*^9, {3.781439104876899*^9, 
   3.7814391344053497`*^9}, {3.7814394535688467`*^9, 3.7814394581207047`*^9}, 
   3.781457322620882*^9, 3.78188486163474*^9, 3.781952822497775*^9, 
   3.781952898261024*^9, {3.781953896487258*^9, 3.781953916168281*^9}, 
   3.782130655037745*^9, 3.7827471589942493`*^9, 3.783078894796163*^9, 
   3.785162687556292*^9, 3.785164975528594*^9, 3.7897326510301743`*^9, 
   3.795174658845468*^9, 3.799320671848111*^9, 3.7993401455539513`*^9, 
   3.7997564277832108`*^9, 3.800007657980575*^9, 3.800268186111622*^9, 
   3.8140055881642313`*^9, 3.814081468356298*^9, 3.8141894011950912`*^9, 
   3.8141959652989473`*^9, 3.814196514437024*^9},
 CellLabel->
  "Out[1334]=",ExpressionUUID->"a39878f8-78a0-48a9-a1a2-8548eff096cc"],

Cell[BoxData[
 RowBox[{
  RowBox[{"2", "+", 
   RowBox[{"3", " ", "\[Delta]"}], "+", 
   RowBox[{"sf", " ", 
    RowBox[{"(", 
     RowBox[{
      RowBox[{"-", "2"}], "-", 
      RowBox[{
       RowBox[{"(", 
        RowBox[{"2", "+", "h"}], ")"}], " ", "\[Delta]"}], "+", 
      RowBox[{
       RowBox[{"(", 
        RowBox[{"2", "+", "h"}], ")"}], " ", "sm", " ", 
       RowBox[{"(", 
        RowBox[{"1", "+", "\[Delta]"}], ")"}]}]}], ")"}]}]}], "<", 
  RowBox[{"3", " ", "sm", " ", 
   RowBox[{"(", 
    RowBox[{"1", "+", "\[Delta]"}], ")"}]}]}]], "Output",
 CellChangeTimes->{{3.781437175151822*^9, 3.781437202530854*^9}, {
   3.781437295782474*^9, 3.781437352236356*^9}, 3.7814374035892963`*^9, 
   3.781437613171399*^9, 3.781439043535357*^9, {3.781439104876899*^9, 
   3.7814391344053497`*^9}, {3.7814394535688467`*^9, 3.7814394581207047`*^9}, 
   3.781457322620882*^9, 3.78188486163474*^9, 3.781952822497775*^9, 
   3.781952898261024*^9, {3.781953896487258*^9, 3.781953916168281*^9}, 
   3.782130655037745*^9, 3.7827471589942493`*^9, 3.783078894796163*^9, 
   3.785162687556292*^9, 3.785164975528594*^9, 3.7897326510301743`*^9, 
   3.795174658845468*^9, 3.799320671848111*^9, 3.7993401455539513`*^9, 
   3.7997564277832108`*^9, 3.800007657980575*^9, 3.800268186111622*^9, 
   3.8140055881642313`*^9, 3.814081468356298*^9, 3.8141894011950912`*^9, 
   3.8141959652989473`*^9, 3.8141965146853523`*^9},
 CellLabel->
  "Out[1335]=",ExpressionUUID->"0d326dd4-b466-4acf-a0dc-aa8076598e89"],

Cell[BoxData[
 RowBox[{
  RowBox[{"3", "+", 
   RowBox[{"h", " ", "sf"}]}], "<", 
  RowBox[{"4", " ", "sf"}]}]], "Output",
 CellChangeTimes->{{3.781437175151822*^9, 3.781437202530854*^9}, {
   3.781437295782474*^9, 3.781437352236356*^9}, 3.7814374035892963`*^9, 
   3.781437613171399*^9, 3.781439043535357*^9, {3.781439104876899*^9, 
   3.7814391344053497`*^9}, {3.7814394535688467`*^9, 3.7814394581207047`*^9}, 
   3.781457322620882*^9, 3.78188486163474*^9, 3.781952822497775*^9, 
   3.781952898261024*^9, {3.781953896487258*^9, 3.781953916168281*^9}, 
   3.782130655037745*^9, 3.7827471589942493`*^9, 3.783078894796163*^9, 
   3.785162687556292*^9, 3.785164975528594*^9, 3.7897326510301743`*^9, 
   3.795174658845468*^9, 3.799320671848111*^9, 3.7993401455539513`*^9, 
   3.7997564277832108`*^9, 3.800007657980575*^9, 3.800268186111622*^9, 
   3.8140055881642313`*^9, 3.814081468356298*^9, 3.8141894011950912`*^9, 
   3.8141959652989473`*^9, 3.81419651473297*^9},
 CellLabel->
  "Out[1336]=",ExpressionUUID->"9d98d3a1-1f76-4752-88d8-b1b992cab3f0"],

Cell[BoxData["False"], "Output",
 CellChangeTimes->{{3.781437175151822*^9, 3.781437202530854*^9}, {
   3.781437295782474*^9, 3.781437352236356*^9}, 3.7814374035892963`*^9, 
   3.781437613171399*^9, 3.781439043535357*^9, {3.781439104876899*^9, 
   3.7814391344053497`*^9}, {3.7814394535688467`*^9, 3.7814394581207047`*^9}, 
   3.781457322620882*^9, 3.78188486163474*^9, 3.781952822497775*^9, 
   3.781952898261024*^9, {3.781953896487258*^9, 3.781953916168281*^9}, 
   3.782130655037745*^9, 3.7827471589942493`*^9, 3.783078894796163*^9, 
   3.785162687556292*^9, 3.785164975528594*^9, 3.7897326510301743`*^9, 
   3.795174658845468*^9, 3.799320671848111*^9, 3.7993401455539513`*^9, 
   3.7997564277832108`*^9, 3.800007657980575*^9, 3.800268186111622*^9, 
   3.8140055881642313`*^9, 3.814081468356298*^9, 3.8141894011950912`*^9, 
   3.8141959652989473`*^9, 3.8141965147338753`*^9},
 CellLabel->
  "Out[1337]=",ExpressionUUID->"ccb76f38-d119-4c6c-abc9-5087a899c08a"]
}, Open  ]],

Cell[TextData[{
 "Region r3 is independent of drive and relates only to female heterozygote \
and drive homozygote fitness (it can be rewritten as ",
 Cell[BoxData[
  FormBox[
   RowBox[{
    RowBox[{"1", "-", "s_f"}], " ", "<", " ", 
    RowBox[{
     RowBox[{"(", 
      RowBox[{"1", "-", "hs_f"}], ")"}], "/", "4"}]}], TraditionalForm]],
  ExpressionUUID->"3565beb5-f898-43d1-a701-a48c03571554"],
 ").\n\nThe region defined by r1 is included in all the other regions, so we \
need only satisfy this inequality"
}], "Text",
 CellChangeTimes->{{3.814005601784459*^9, 
  3.8140056112211018`*^9}},ExpressionUUID->"9af9eb1e-7c80-466b-af4a-\
62179fc49259"],

Cell[CellGroupData[{

Cell[BoxData[
 RowBox[{"Reduce", "[", 
  RowBox[{"{", 
   RowBox[{
    RowBox[{"!", "r1"}], ",", "r2", ",", "r3", ",", 
    RowBox[{"1", ">", " ", "\[Delta]", ">", "0"}], ",", 
    RowBox[{"1", ">", "h", ">", "0"}], ",", 
    RowBox[{"1", ">", "sm", ">", "0"}], ",", 
    RowBox[{"0", "<", "sf", "<", "1"}]}], "}"}], "]"}]], "Input",
 CellChangeTimes->{{3.781438491275654*^9, 3.7814385705794687`*^9}, {
  3.781438609675919*^9, 3.781438609925259*^9}, {3.781439361820053*^9, 
  3.781439383480029*^9}, {3.7818742029198303`*^9, 3.7818742196134233`*^9}},
 CellLabel->
  "In[1338]:=",ExpressionUUID->"491fb21d-1290-499e-87eb-f450adfd4779"],

Cell[BoxData["False"], "Output",
 CellChangeTimes->{
  3.7814385244255323`*^9, {3.78143855490099*^9, 3.781438571329862*^9}, 
   3.781438610236524*^9, {3.781439344792201*^9, 3.781439389623969*^9}, 
   3.7814394716890707`*^9, 3.781440562046509*^9, 3.781457323045916*^9, {
   3.781874206107297*^9, 3.781874221613144*^9}, 3.781884862070531*^9, 
   3.7819528229217377`*^9, 3.781952898586425*^9, {3.7819538968695173`*^9, 
   3.781953916535781*^9}, 3.782130655424851*^9, 3.7827471595772257`*^9, 
   3.783078895331085*^9, 3.7851626882942743`*^9, 3.785164976226273*^9, 
   3.7897326518393*^9, 3.79517465934138*^9, 3.799320672547058*^9, 
   3.799340146185979*^9, 3.799756428376923*^9, 3.8000076587001953`*^9, 
   3.800268186632812*^9, 3.814005589787862*^9, 3.8140814700973053`*^9, 
   3.814189401503531*^9, 3.814195965662497*^9, 3.814196514810627*^9},
 CellLabel->
  "Out[1338]=",ExpressionUUID->"e62d4d91-a610-4f42-8f94-af359b527e44"]
}, Open  ]],

Cell["Thus, the instability conditions are:", "Text",
 CellChangeTimes->{{3.814005633840632*^9, 
  3.8140056425480337`*^9}},ExpressionUUID->"82cebce6-a58c-41d6-9fe7-\
68f3c37b6f42"],

Cell[CellGroupData[{

Cell[BoxData[
 RowBox[{"unstabConditions1", " ", "=", " ", "r1"}]], "Input",
 CellChangeTimes->{{3.781440566940112*^9, 3.7814405727307663`*^9}},
 CellLabel->
  "In[1339]:=",ExpressionUUID->"eba6001c-7ecc-487c-bc04-abc003cfbda8"],

Cell[BoxData[
 RowBox[{
  RowBox[{"\[Delta]", "+", 
   RowBox[{"2", " ", "sf", " ", 
    RowBox[{"(", 
     RowBox[{
      RowBox[{"-", "1"}], "+", "sm"}], ")"}], " ", 
    RowBox[{"(", 
     RowBox[{"1", "+", "\[Delta]"}], ")"}]}], "+", 
   RowBox[{"h", " ", "sf", " ", 
    RowBox[{"(", 
     RowBox[{"2", "+", "\[Delta]", "-", 
      RowBox[{"sm", " ", 
       RowBox[{"(", 
        RowBox[{"1", "+", "\[Delta]"}], ")"}]}]}], ")"}]}]}], "<", 
  RowBox[{"sm", " ", 
   RowBox[{"(", 
    RowBox[{"1", "+", "\[Delta]"}], ")"}]}]}]], "Output",
 CellChangeTimes->{
  3.781440573583838*^9, 3.7814573230570507`*^9, 3.781884862079309*^9, 
   3.781952822929488*^9, 3.7819528985964413`*^9, {3.7819538968833323`*^9, 
   3.78195391654261*^9}, 3.7821306554345818`*^9, 3.782747159587644*^9, 
   3.78307889534017*^9, 3.785162688501986*^9, 3.78516497629982*^9, 
   3.7897326519250937`*^9, 3.7951746594067907`*^9, 3.799320672638276*^9, 
   3.799340146500635*^9, 3.799756428598815*^9, 3.8000076589437943`*^9, 
   3.800268186690694*^9, 3.814005590612234*^9, 3.8140814712053947`*^9, 
   3.8141894015172462`*^9, 3.814195965669839*^9, 3.814196514816902*^9},
 CellLabel->
  "Out[1339]=",ExpressionUUID->"463bdf59-0013-4c54-bd28-cf8aa8c64cf9"]
}, Open  ]],

Cell["which can be re-written using the w fitness notation", "Text",
 CellChangeTimes->{{3.78187228235487*^9, 3.781872375904385*^9}, 
   3.814005627241395*^9},ExpressionUUID->"65db19cc-62c1-4302-9fc4-\
09cc92a8709c"],

Cell[CellGroupData[{

Cell[BoxData[
 RowBox[{"FullSimplify", "[", 
  RowBox[{"unstabConditions1", ",", 
   RowBox[{"{", 
    RowBox[{
     RowBox[{"wXdY", "\[Equal]", 
      RowBox[{"1", "-", "sm"}]}], ",", 
     RowBox[{"wXdX", " ", "\[Equal]", " ", 
      RowBox[{"1", " ", "-", " ", 
       RowBox[{"h", " ", "sf"}]}]}], ",", 
     RowBox[{"wXdXd", " ", "\[Equal]", " ", 
      RowBox[{"1", " ", "-", " ", "sf"}]}]}], "}"}]}], "]"}]], "Input",
 CellChangeTimes->{{3.783082107345252*^9, 3.7830821633262053`*^9}},
 CellLabel->
  "In[1340]:=",ExpressionUUID->"de8f62a2-64e2-404d-aae8-663b919d7c2d"],

Cell[BoxData[
 RowBox[{
  RowBox[{"2", " ", "wXdXd", " ", "wXdY", " ", 
   RowBox[{"(", 
    RowBox[{"1", "+", "\[Delta]"}], ")"}]}], "<", 
  RowBox[{"wXdX", " ", 
   RowBox[{"(", 
    RowBox[{"1", "+", "wXdY", "+", 
     RowBox[{"wXdY", " ", "\[Delta]"}]}], ")"}]}]}]], "Output",
 CellChangeTimes->{{3.783082123089921*^9, 3.7830821639965973`*^9}, 
   3.785162688703109*^9, 3.785164976483889*^9, 3.789732652155534*^9, 
   3.795174659581051*^9, 3.799320672863186*^9, 3.799340146798864*^9, 
   3.79975642881137*^9, 3.800007659149609*^9, 3.800268186858501*^9, 
   3.814081472383049*^9, 3.814189401559244*^9, 3.8141959657852297`*^9, 
   3.814196514932007*^9},
 CellLabel->
  "Out[1340]=",ExpressionUUID->"d70e4ebf-e872-4ddc-8d19-edee238d7459"]
}, Open  ]]
}, Closed]]
}, Closed]],

Cell[CellGroupData[{

Cell["Critical birth rate", "Subsection",
 CellChangeTimes->{{3.781270243104228*^9, 
  3.781270244885517*^9}},ExpressionUUID->"84474009-2768-4dd8-97c9-\
3a4b7276fabc"],

Cell["\<\
The critical birth rate is the lowest birth rate for which a population still \
exists (equilibrium population size, N, bigger than 0). 

We first find the critical birth rate when drive is absent, polymorphic, or \
fixed. \
\>", "Text",
 CellChangeTimes->{{3.813930468388834*^9, 3.8139304720109*^9}, {
  3.8139306445371513`*^9, 
  3.813930713094428*^9}},ExpressionUUID->"a6911daa-5507-424e-90e6-\
cb28c25dcca6"],

Cell[CellGroupData[{

Cell[BoxData[{
 RowBox[{"bcritNoDrive", "=", 
  RowBox[{"b", "/.", 
   RowBox[{
    RowBox[{"Solve", "[", 
     RowBox[{
      RowBox[{
       RowBox[{"Simplify", "[", 
        RowBox[{
         RowBox[{"(", 
          RowBox[{"maleNum", " ", "+", " ", "femaleNum"}], ")"}], "/.", 
         "noDrivePopSizeSol"}], "]"}], "\[Equal]", "0"}], ",", "b"}], "]"}], 
    "[", 
    RowBox[{"[", "1", "]"}], "]"}]}]}], "\[IndentingNewLine]", 
 RowBox[{"bcritEquil", "=", 
  RowBox[{"b", "/.", 
   RowBox[{
    RowBox[{"Solve", "[", 
     RowBox[{
      RowBox[{"Neq", "\[Equal]", "0"}], ",", "b"}], "]"}], "[", 
    RowBox[{"[", "1", "]"}], "]"}]}]}], "\[IndentingNewLine]", 
 RowBox[{"bcritFixed", "=", 
  RowBox[{"b", "/.", 
   RowBox[{
    RowBox[{"Solve", "[", 
     RowBox[{
      RowBox[{"Nfixed", "\[Equal]", "0"}], ",", "b"}], "]"}], "[", 
    RowBox[{"[", "1", "]"}], "]"}]}]}]}], "Input",
 CellChangeTimes->{{3.813928398062742*^9, 3.813928561860159*^9}},
 CellLabel->
  "In[1341]:=",ExpressionUUID->"a84301ba-cf0e-4539-a1f4-955b7eb24eff"],

Cell[BoxData["2"], "Output",
 CellChangeTimes->{
  3.813928401523972*^9, {3.813928434003956*^9, 3.813928529425839*^9}, 
   3.813928562308132*^9, 3.814081785262821*^9, 3.814189401571858*^9, 
   3.814195965795162*^9, 3.8141965149389544`*^9},
 CellLabel->
  "Out[1341]=",ExpressionUUID->"a9fcffa3-1ba9-4eb2-8060-c38425e13d68"],

Cell[BoxData[
 RowBox[{"-", 
  RowBox[{"(", 
   RowBox[{
    RowBox[{"(", 
     RowBox[{"4", " ", 
      RowBox[{"(", 
       RowBox[{
        RowBox[{
         RowBox[{"-", "2"}], " ", "sf"}], "+", 
        RowBox[{"4", " ", "h", " ", "sf"}], "+", 
        RowBox[{"2", " ", "sf", " ", "sm"}], "-", 
        RowBox[{"4", " ", "h", " ", "sf", " ", "sm"}], "-", 
        SuperscriptBox["sm", "2"], "+", 
        RowBox[{"h", " ", "sf", " ", 
         SuperscriptBox["sm", "2"]}], "-", 
        RowBox[{"2", " ", "sf", " ", "\[Delta]"}], "+", 
        RowBox[{"2", " ", "h", " ", "sf", " ", "\[Delta]"}], "+", 
        RowBox[{"sm", " ", "\[Delta]"}], "+", 
        RowBox[{"2", " ", "sf", " ", "sm", " ", "\[Delta]"}], "-", 
        RowBox[{"3", " ", "h", " ", "sf", " ", "sm", " ", "\[Delta]"}], "-", 
        RowBox[{
         SuperscriptBox["sm", "2"], " ", "\[Delta]"}], "+", 
        RowBox[{"h", " ", "sf", " ", 
         SuperscriptBox["sm", "2"], " ", "\[Delta]"}]}], ")"}]}], ")"}], "/", 
    RowBox[{"(", 
     RowBox[{
      RowBox[{"4", " ", "sf"}], "-", 
      RowBox[{"8", " ", "h", " ", "sf"}], "+", 
      RowBox[{"4", " ", 
       SuperscriptBox["h", "2"], " ", 
       SuperscriptBox["sf", "2"]}], "-", 
      RowBox[{"4", " ", "sf", " ", "sm"}], "+", 
      RowBox[{"8", " ", "h", " ", "sf", " ", "sm"}], "-", 
      RowBox[{"4", " ", 
       SuperscriptBox["h", "2"], " ", 
       SuperscriptBox["sf", "2"], " ", "sm"}], "+", 
      SuperscriptBox["sm", "2"], "-", 
      RowBox[{"2", " ", "h", " ", "sf", " ", 
       SuperscriptBox["sm", "2"]}], "+", 
      RowBox[{
       SuperscriptBox["h", "2"], " ", 
       SuperscriptBox["sf", "2"], " ", 
       SuperscriptBox["sm", "2"]}], "+", 
      RowBox[{"4", " ", "sf", " ", "\[Delta]"}], "-", 
      RowBox[{"8", " ", "h", " ", "sf", " ", "\[Delta]"}], "+", 
      RowBox[{"4", " ", 
       SuperscriptBox["h", "2"], " ", 
       SuperscriptBox["sf", "2"], " ", "\[Delta]"}], "-", 
      RowBox[{"2", " ", "sm", " ", "\[Delta]"}], "-", 
      RowBox[{"4", " ", "sf", " ", "sm", " ", "\[Delta]"}], "+", 
      RowBox[{"12", " ", "h", " ", "sf", " ", "sm", " ", "\[Delta]"}], "-", 
      RowBox[{"6", " ", 
       SuperscriptBox["h", "2"], " ", 
       SuperscriptBox["sf", "2"], " ", "sm", " ", "\[Delta]"}], "+", 
      RowBox[{"2", " ", 
       SuperscriptBox["sm", "2"], " ", "\[Delta]"}], "-", 
      RowBox[{"4", " ", "h", " ", "sf", " ", 
       SuperscriptBox["sm", "2"], " ", "\[Delta]"}], "+", 
      RowBox[{"2", " ", 
       SuperscriptBox["h", "2"], " ", 
       SuperscriptBox["sf", "2"], " ", 
       SuperscriptBox["sm", "2"], " ", "\[Delta]"}], "+", 
      SuperscriptBox["\[Delta]", "2"], "-", 
      RowBox[{"2", " ", "h", " ", "sf", " ", 
       SuperscriptBox["\[Delta]", "2"]}], "+", 
      RowBox[{
       SuperscriptBox["h", "2"], " ", 
       SuperscriptBox["sf", "2"], " ", 
       SuperscriptBox["\[Delta]", "2"]}], "-", 
      RowBox[{"2", " ", "sm", " ", 
       SuperscriptBox["\[Delta]", "2"]}], "+", 
      RowBox[{"4", " ", "h", " ", "sf", " ", "sm", " ", 
       SuperscriptBox["\[Delta]", "2"]}], "-", 
      RowBox[{"2", " ", 
       SuperscriptBox["h", "2"], " ", 
       SuperscriptBox["sf", "2"], " ", "sm", " ", 
       SuperscriptBox["\[Delta]", "2"]}], "+", 
      RowBox[{
       SuperscriptBox["sm", "2"], " ", 
       SuperscriptBox["\[Delta]", "2"]}], "-", 
      RowBox[{"2", " ", "h", " ", "sf", " ", 
       SuperscriptBox["sm", "2"], " ", 
       SuperscriptBox["\[Delta]", "2"]}], "+", 
      RowBox[{
       SuperscriptBox["h", "2"], " ", 
       SuperscriptBox["sf", "2"], " ", 
       SuperscriptBox["sm", "2"], " ", 
       SuperscriptBox["\[Delta]", "2"]}]}], ")"}]}], ")"}]}]], "Output",
 CellChangeTimes->{
  3.813928401523972*^9, {3.813928434003956*^9, 3.813928529425839*^9}, 
   3.813928562308132*^9, 3.814081785262821*^9, 3.814189401571858*^9, 
   3.814195965795162*^9, 3.81419651498464*^9},
 CellLabel->
  "Out[1342]=",ExpressionUUID->"096912d8-e96d-4233-b417-bf0eaf30a9b1"],

Cell[BoxData[
 RowBox[{"-", 
  FractionBox["2", 
   RowBox[{
    RowBox[{"(", 
     RowBox[{
      RowBox[{"-", "1"}], "+", "sf"}], ")"}], " ", 
    RowBox[{"(", 
     RowBox[{"1", "+", "\[Delta]"}], ")"}]}]]}]], "Output",
 CellChangeTimes->{
  3.813928401523972*^9, {3.813928434003956*^9, 3.813928529425839*^9}, 
   3.813928562308132*^9, 3.814081785262821*^9, 3.814189401571858*^9, 
   3.814195965795162*^9, 3.814196514987307*^9},
 CellLabel->
  "Out[1343]=",ExpressionUUID->"f5964664-00d2-4470-b2f2-61f5cc56846d"]
}, Open  ]],

Cell["\<\
Given that drive is polymorphic (\[Phi]>0,\[CurlyPhi]>0), the critical birth \
rate is always smaller than it would have been without drive
Given that drive reaches fixation (\[Phi]>0,\[CurlyPhi]<0), the critical \
birth rate is always smaller than it would have been without drive\
\>", "Text",
 CellChangeTimes->{{3.813930720878367*^9, 
  3.813930768858816*^9}},ExpressionUUID->"a1a39302-2e9c-467b-853f-\
9039b002746c"],

Cell[CellGroupData[{

Cell[BoxData[{
 RowBox[{"Reduce", "[", 
  RowBox[{"{", 
   RowBox[{
    RowBox[{"bcritNoDrive", "<", "bcritEquil"}], ",", " ", 
    RowBox[{"0", "<", "sf", "<", "1"}], ",", 
    RowBox[{"0", "<", "h", "<", "1"}], ",", 
    RowBox[{"0", "<", "sm", "<", "1"}], ",", 
    RowBox[{"0", "<", "b"}], ",", " ", 
    RowBox[{"0", "<", "\[Delta]", "<", "1"}], ",", " ", 
    RowBox[{"\[Phi]", ">", "0"}], ",", 
    RowBox[{"\[CurlyPhi]", ">", "0"}]}], "}"}], "]"}], "\[IndentingNewLine]", 
 RowBox[{"Reduce", "[", 
  RowBox[{"{", 
   RowBox[{
    RowBox[{"bcritNoDrive", "<", "bcritFixed"}], ",", " ", 
    RowBox[{"0", "<", "sf", "<", "1"}], ",", 
    RowBox[{"0", "<", "h", "<", "1"}], ",", 
    RowBox[{"0", "<", "sm", "<", "1"}], ",", 
    RowBox[{"0", "<", "b"}], ",", " ", 
    RowBox[{"0", "<", "\[Delta]", "<", "1"}], ",", " ", 
    RowBox[{"\[Phi]", ">", "0"}], ",", 
    RowBox[{"\[CurlyPhi]", "<", "0"}]}], "}"}], "]"}]}], "Input",
 CellChangeTimes->{{3.81392856865447*^9, 3.81392863122628*^9}, 
   3.813928679185483*^9, {3.81393002322504*^9, 3.813930051570941*^9}, {
   3.813930082291155*^9, 3.813930177188037*^9}},
 CellLabel->
  "In[1344]:=",ExpressionUUID->"8dfa1109-9f28-44f2-ab69-f549df3c952a"],

Cell[BoxData["False"], "Output",
 CellChangeTimes->{{3.8139286049658337`*^9, 3.813928627951355*^9}, 
   3.813928684723576*^9, {3.8139300258073263`*^9, 3.8139300537471743`*^9}, {
   3.81393010421644*^9, 3.813930128247485*^9}, {3.813930158987651*^9, 
   3.8139301784794807`*^9}, 3.814081786639469*^9, 3.814189401790324*^9, 
   3.814195965961636*^9, 3.814196515124393*^9},
 CellLabel->
  "Out[1344]=",ExpressionUUID->"3e8a93d7-6ba5-4512-a7b9-d5cc32dd4360"],

Cell[BoxData["False"], "Output",
 CellChangeTimes->{{3.8139286049658337`*^9, 3.813928627951355*^9}, 
   3.813928684723576*^9, {3.8139300258073263`*^9, 3.8139300537471743`*^9}, {
   3.81393010421644*^9, 3.813930128247485*^9}, {3.813930158987651*^9, 
   3.8139301784794807`*^9}, 3.814081786639469*^9, 3.814189401790324*^9, 
   3.814195965961636*^9, 3.814196515159802*^9},
 CellLabel->
  "Out[1345]=",ExpressionUUID->"b886918b-da0f-4148-a97d-80a922096c2c"]
}, Open  ]],

Cell["\<\
The following functions define population sizes in these different cases for \
plotting (the same as the expressions derived above). \
\>", "Text",
 CellChangeTimes->{{3.7814619363838*^9, 3.7814619713578672`*^9}, {
  3.8000093523264723`*^9, 3.800009438490551*^9}, {3.813930793248259*^9, 
  3.813930824297714*^9}},ExpressionUUID->"92f7d12e-62d8-49ec-bd54-\
9a11abb6bf3e"],

Cell[BoxData[{
 RowBox[{
  RowBox[{"func", "[", 
   RowBox[{"{", 
    RowBox[{
    "sf_", ",", " ", "sm_", ",", " ", "h_", ",", " ", "\[Delta]_", ",", 
     "\[Alpha]_", ",", " ", "c_", ",", " ", "b_"}], "}"}], "]"}], ":=", 
  "\[IndentingNewLine]", 
  RowBox[{"If", "[", "\[IndentingNewLine]", 
   RowBox[{
    RowBox[{
     RowBox[{
      RowBox[{
       RowBox[{"(", 
        RowBox[{"sf", " ", 
         RowBox[{"(", 
          RowBox[{
           RowBox[{
            RowBox[{"-", 
             RowBox[{"(", 
              RowBox[{
               RowBox[{"-", "1"}], "+", "sm"}], ")"}]}], " ", 
            RowBox[{"(", 
             RowBox[{"1", "+", "\[Delta]"}], ")"}]}], "+", 
           RowBox[{"h", " ", 
            RowBox[{"(", 
             RowBox[{
              RowBox[{"-", "2"}], "+", "sm", "-", "\[Delta]", "+", 
              RowBox[{"sm", " ", "\[Delta]"}]}], ")"}]}]}], ")"}], " ", 
         RowBox[{"(", 
          RowBox[{
           RowBox[{"b", " ", 
            SuperscriptBox["h", "2"], " ", 
            SuperscriptBox["sf", "2"], " ", 
            SuperscriptBox[
             RowBox[{"(", 
              RowBox[{
               RowBox[{"-", "2"}], "+", "sm", "-", "\[Delta]", "+", 
               RowBox[{"sm", " ", "\[Delta]"}]}], ")"}], "2"]}], "+", 
           RowBox[{
            RowBox[{"(", 
             RowBox[{"sm", "-", "\[Delta]", "+", 
              RowBox[{"sm", " ", "\[Delta]"}]}], ")"}], " ", 
            RowBox[{"(", 
             RowBox[{
              RowBox[{
               RowBox[{"-", "b"}], " ", "\[Delta]"}], "+", 
              RowBox[{"sm", " ", 
               RowBox[{"(", 
                RowBox[{
                 RowBox[{"-", "4"}], "+", "b", "+", 
                 RowBox[{"b", " ", "\[Delta]"}]}], ")"}]}]}], ")"}]}], "-", 
           RowBox[{"2", " ", "sf", " ", 
            RowBox[{"(", 
             RowBox[{
              RowBox[{
               RowBox[{"-", "4"}], " ", 
               RowBox[{"(", 
                RowBox[{
                 RowBox[{"-", "1"}], "+", "sm"}], ")"}], " ", 
               RowBox[{"(", 
                RowBox[{"1", "+", "\[Delta]"}], ")"}]}], "+", 
              RowBox[{"2", " ", "b", " ", 
               RowBox[{"(", 
                RowBox[{
                 RowBox[{"-", "1"}], "+", "sm"}], ")"}], " ", 
               RowBox[{"(", 
                RowBox[{"1", "+", "\[Delta]"}], ")"}]}], "-", 
              RowBox[{"2", " ", "h", " ", 
               RowBox[{"(", 
                RowBox[{
                 RowBox[{"-", "2"}], "+", "sm"}], ")"}], " ", 
               RowBox[{"(", 
                RowBox[{
                 RowBox[{"-", "2"}], "+", "sm", "-", "\[Delta]", "+", 
                 RowBox[{"sm", " ", "\[Delta]"}]}], ")"}]}], "+", 
              RowBox[{"b", " ", "h", " ", 
               SuperscriptBox[
                RowBox[{"(", 
                 RowBox[{
                  RowBox[{"-", "2"}], "+", "sm", "-", "\[Delta]", "+", 
                  RowBox[{"sm", " ", "\[Delta]"}]}], ")"}], "2"]}]}], 
             ")"}]}]}], ")"}]}], ")"}], "/", 
       RowBox[{"(", 
        RowBox[{"b", " ", "\[Alpha]", " ", 
         RowBox[{"(", 
          RowBox[{
           RowBox[{
            RowBox[{"-", "sm"}], " ", 
            RowBox[{"(", 
             RowBox[{
              RowBox[{"sm", " ", 
               RowBox[{"(", 
                RowBox[{
                 RowBox[{"-", "1"}], "+", "\[Delta]"}], ")"}]}], "-", 
              "\[Delta]"}], ")"}], " ", 
            SuperscriptBox[
             RowBox[{"(", 
              RowBox[{"sm", "-", "\[Delta]", "+", 
               RowBox[{"sm", " ", "\[Delta]"}]}], ")"}], "2"]}], "+", 
           RowBox[{
            SuperscriptBox["h", "2"], " ", 
            SuperscriptBox["sf", "3"], " ", 
            SuperscriptBox[
             RowBox[{"(", 
              RowBox[{
               RowBox[{"-", "2"}], "+", "sm", "-", "\[Delta]", "+", 
               RowBox[{"sm", " ", "\[Delta]"}]}], ")"}], "2"], " ", 
            RowBox[{"(", 
             RowBox[{
              RowBox[{
               RowBox[{"-", 
                RowBox[{"(", 
                 RowBox[{
                  RowBox[{"-", "1"}], "+", "sm"}], ")"}]}], " ", 
               RowBox[{"(", 
                RowBox[{"1", "+", "\[Delta]"}], ")"}]}], "+", 
              RowBox[{"h", " ", 
               RowBox[{"(", 
                RowBox[{
                 RowBox[{"-", "2"}], "+", "sm", "-", "\[Delta]", "+", 
                 RowBox[{"sm", " ", "\[Delta]"}]}], ")"}]}]}], ")"}]}], "+", 
           RowBox[{
            SuperscriptBox["sf", "2"], " ", 
            RowBox[{"(", 
             RowBox[{
              RowBox[{"8", " ", 
               SuperscriptBox[
                RowBox[{"(", 
                 RowBox[{
                  RowBox[{"-", "1"}], "+", "sm"}], ")"}], "2"], " ", 
               SuperscriptBox[
                RowBox[{"(", 
                 RowBox[{"1", "+", "\[Delta]"}], ")"}], "2"]}], "+", 
              RowBox[{"2", " ", "h", " ", 
               RowBox[{"(", 
                RowBox[{"8", "-", 
                 RowBox[{"11", " ", "sm"}], "+", 
                 RowBox[{"3", " ", 
                  SuperscriptBox["sm", "2"]}]}], ")"}], " ", 
               RowBox[{"(", 
                RowBox[{"1", "+", "\[Delta]"}], ")"}], " ", 
               RowBox[{"(", 
                RowBox[{
                 RowBox[{"-", "2"}], "+", "sm", "-", "\[Delta]", "+", 
                 RowBox[{"sm", " ", "\[Delta]"}]}], ")"}]}], "-", 
              RowBox[{
               SuperscriptBox["h", "2"], " ", 
               RowBox[{"(", 
                RowBox[{
                 RowBox[{"-", "8"}], "-", 
                 RowBox[{"sm", " ", 
                  RowBox[{"(", 
                   RowBox[{
                    RowBox[{"-", "6"}], "+", "\[Delta]"}], ")"}]}], "+", 
                 RowBox[{
                  SuperscriptBox["sm", "2"], " ", 
                  RowBox[{"(", 
                   RowBox[{
                    RowBox[{"-", "1"}], "+", "\[Delta]"}], ")"}]}]}], ")"}], 
               " ", 
               SuperscriptBox[
                RowBox[{"(", 
                 RowBox[{
                  RowBox[{"-", "2"}], "+", "sm", "-", "\[Delta]", "+", 
                  RowBox[{"sm", " ", "\[Delta]"}]}], ")"}], "2"]}]}], ")"}]}],
            "+", 
           RowBox[{"sf", " ", 
            RowBox[{"(", 
             RowBox[{"sm", "-", "\[Delta]", "+", 
              RowBox[{"sm", " ", "\[Delta]"}]}], ")"}], " ", 
            RowBox[{"(", 
             RowBox[{
              RowBox[{"2", " ", "h", " ", 
               SuperscriptBox["sm", "3"], " ", 
               RowBox[{"(", 
                RowBox[{
                 RowBox[{"-", "1"}], "+", 
                 SuperscriptBox["\[Delta]", "2"]}], ")"}]}], "+", 
              RowBox[{"\[Delta]", " ", 
               RowBox[{"(", 
                RowBox[{"1", "+", "\[Delta]", "-", 
                 RowBox[{"h", " ", 
                  RowBox[{"(", 
                   RowBox[{"2", "+", "\[Delta]"}], ")"}]}]}], ")"}]}], "+", 
              RowBox[{
               SuperscriptBox["sm", "2"], " ", 
               RowBox[{"(", 
                RowBox[{
                 RowBox[{"-", "5"}], "-", 
                 RowBox[{"4", " ", "\[Delta]"}], "+", 
                 SuperscriptBox["\[Delta]", "2"], "+", 
                 RowBox[{"h", " ", 
                  RowBox[{"(", 
                   RowBox[{"9", "-", 
                    RowBox[{"5", " ", 
                    SuperscriptBox["\[Delta]", "2"]}]}], ")"}]}]}], ")"}]}], 
              "+", 
              RowBox[{"sm", " ", 
               RowBox[{"(", 
                RowBox[{"5", "+", 
                 RowBox[{"3", " ", "\[Delta]"}], "-", 
                 RowBox[{"2", " ", 
                  SuperscriptBox["\[Delta]", "2"]}], "+", 
                 RowBox[{"2", " ", "h", " ", 
                  RowBox[{"(", 
                   RowBox[{
                    RowBox[{"-", "5"}], "+", "\[Delta]", "+", 
                    RowBox[{"2", " ", 
                    SuperscriptBox["\[Delta]", "2"]}]}], ")"}]}]}], ")"}]}]}],
              ")"}]}]}], ")"}]}], ")"}]}], "-", 
      RowBox[{
       RowBox[{"(", 
        RowBox[{
         RowBox[{"(", 
          RowBox[{
           RowBox[{"b", " ", 
            SuperscriptBox["h", "2"], " ", 
            SuperscriptBox["sf", "2"], " ", 
            SuperscriptBox[
             RowBox[{"(", 
              RowBox[{
               RowBox[{"-", "2"}], "+", "sm", "-", "\[Delta]", "+", 
               RowBox[{"sm", " ", "\[Delta]"}]}], ")"}], "2"]}], "+", 
           RowBox[{
            RowBox[{"(", 
             RowBox[{"sm", "-", "\[Delta]", "+", 
              RowBox[{"sm", " ", "\[Delta]"}]}], ")"}], " ", 
            RowBox[{"(", 
             RowBox[{
              RowBox[{
               RowBox[{"-", "b"}], " ", "\[Delta]"}], "+", 
              RowBox[{"sm", " ", 
               RowBox[{"(", 
                RowBox[{
                 RowBox[{"-", "4"}], "+", "b", "+", 
                 RowBox[{"b", " ", "\[Delta]"}]}], ")"}]}]}], ")"}]}], "-", 
           RowBox[{"2", " ", "sf", " ", 
            RowBox[{"(", 
             RowBox[{
              RowBox[{
               RowBox[{"-", "4"}], " ", 
               RowBox[{"(", 
                RowBox[{
                 RowBox[{"-", "1"}], "+", "sm"}], ")"}], " ", 
               RowBox[{"(", 
                RowBox[{"1", "+", "\[Delta]"}], ")"}]}], "+", 
              RowBox[{"2", " ", "b", " ", 
               RowBox[{"(", 
                RowBox[{
                 RowBox[{"-", "1"}], "+", "sm"}], ")"}], " ", 
               RowBox[{"(", 
                RowBox[{"1", "+", "\[Delta]"}], ")"}]}], "-", 
              RowBox[{"2", " ", "h", " ", 
               RowBox[{"(", 
                RowBox[{
                 RowBox[{"-", "2"}], "+", "sm"}], ")"}], " ", 
               RowBox[{"(", 
                RowBox[{
                 RowBox[{"-", "2"}], "+", "sm", "-", "\[Delta]", "+", 
                 RowBox[{"sm", " ", "\[Delta]"}]}], ")"}]}], "+", 
              RowBox[{"b", " ", "h", " ", 
               SuperscriptBox[
                RowBox[{"(", 
                 RowBox[{
                  RowBox[{"-", "2"}], "+", "sm", "-", "\[Delta]", "+", 
                  RowBox[{"sm", " ", "\[Delta]"}]}], ")"}], "2"]}]}], 
             ")"}]}]}], ")"}], " ", 
         RowBox[{"(", 
          RowBox[{
           RowBox[{"sm", " ", 
            RowBox[{"(", 
             RowBox[{
              RowBox[{"sm", " ", 
               RowBox[{"(", 
                RowBox[{
                 RowBox[{"-", "1"}], "+", "\[Delta]"}], ")"}]}], "-", 
              "\[Delta]"}], ")"}], " ", 
            SuperscriptBox[
             RowBox[{"(", 
              RowBox[{"sm", "-", "\[Delta]", "+", 
               RowBox[{"sm", " ", "\[Delta]"}]}], ")"}], "2"]}], "+", 
           RowBox[{
            SuperscriptBox["sf", "2"], " ", 
            RowBox[{"(", 
             RowBox[{
              RowBox[{
               RowBox[{"-", "4"}], " ", 
               SuperscriptBox[
                RowBox[{"(", 
                 RowBox[{
                  RowBox[{"-", "1"}], "+", "sm"}], ")"}], "2"], " ", 
               SuperscriptBox[
                RowBox[{"(", 
                 RowBox[{"1", "+", "\[Delta]"}], ")"}], "2"]}], "+", 
              RowBox[{
               SuperscriptBox["h", "2"], " ", 
               RowBox[{"(", 
                RowBox[{
                 RowBox[{"-", "2"}], "+", "sm"}], ")"}], " ", 
               RowBox[{"(", 
                RowBox[{"2", "+", 
                 RowBox[{"sm", " ", 
                  RowBox[{"(", 
                   RowBox[{
                    RowBox[{"-", "1"}], "+", "\[Delta]"}], ")"}]}], "-", 
                 "\[Delta]"}], ")"}], " ", 
               SuperscriptBox[
                RowBox[{"(", 
                 RowBox[{
                  RowBox[{"-", "2"}], "+", "sm", "-", "\[Delta]", "+", 
                  RowBox[{"sm", " ", "\[Delta]"}]}], ")"}], "2"]}], "+", 
              RowBox[{"2", " ", "h", " ", 
               RowBox[{"(", 
                RowBox[{
                 RowBox[{"-", "1"}], "+", "sm"}], ")"}], " ", 
               RowBox[{"(", 
                RowBox[{"1", "+", "\[Delta]"}], ")"}], " ", 
               RowBox[{"(", 
                RowBox[{
                 RowBox[{"-", "8"}], "-", 
                 RowBox[{"2", " ", "\[Delta]"}], "+", 
                 SuperscriptBox["\[Delta]", "2"], "+", 
                 RowBox[{"sm", " ", 
                  RowBox[{"(", 
                   RowBox[{"8", "+", 
                    RowBox[{"3", " ", "\[Delta]"}], "-", 
                    RowBox[{"2", " ", 
                    SuperscriptBox["\[Delta]", "2"]}]}], ")"}]}], "+", 
                 RowBox[{
                  SuperscriptBox["sm", "2"], " ", 
                  RowBox[{"(", 
                   RowBox[{
                    RowBox[{"-", "2"}], "-", "\[Delta]", "+", 
                    SuperscriptBox["\[Delta]", "2"]}], ")"}]}]}], ")"}]}]}], 
             ")"}]}], "-", 
           RowBox[{"2", " ", "sf", " ", 
            RowBox[{"(", 
             RowBox[{"sm", "-", "\[Delta]", "+", 
              RowBox[{"sm", " ", "\[Delta]"}]}], ")"}], " ", 
            RowBox[{"(", 
             RowBox[{
              RowBox[{"h", " ", 
               SuperscriptBox["sm", "3"], " ", 
               RowBox[{"(", 
                RowBox[{
                 RowBox[{"-", "1"}], "+", 
                 SuperscriptBox["\[Delta]", "2"]}], ")"}]}], "+", 
              RowBox[{"\[Delta]", " ", 
               RowBox[{"(", 
                RowBox[{"1", "+", "\[Delta]", "-", 
                 RowBox[{"h", " ", 
                  RowBox[{"(", 
                   RowBox[{"2", "+", "\[Delta]"}], ")"}]}]}], ")"}]}], "-", 
              RowBox[{
               SuperscriptBox["sm", "2"], " ", 
               RowBox[{"(", 
                RowBox[{"2", "+", "\[Delta]", "-", 
                 SuperscriptBox["\[Delta]", "2"], "+", 
                 RowBox[{"h", " ", 
                  RowBox[{"(", 
                   RowBox[{
                    RowBox[{"-", "4"}], "+", "\[Delta]", "+", 
                    RowBox[{"3", " ", 
                    SuperscriptBox["\[Delta]", "2"]}]}], ")"}]}]}], ")"}]}], 
              "+", 
              RowBox[{"sm", " ", 
               RowBox[{"(", 
                RowBox[{"2", "-", 
                 RowBox[{"2", " ", 
                  SuperscriptBox["\[Delta]", "2"]}], "+", 
                 RowBox[{"h", " ", 
                  RowBox[{"(", 
                   RowBox[{
                    RowBox[{"-", "4"}], "+", 
                    RowBox[{"3", " ", "\[Delta]"}], "+", 
                    RowBox[{"3", " ", 
                    SuperscriptBox["\[Delta]", "2"]}]}], ")"}]}]}], ")"}]}]}],
              ")"}]}]}], ")"}]}], ")"}], "/", 
       RowBox[{"(", 
        RowBox[{"b", " ", "\[Alpha]", " ", 
         RowBox[{"(", 
          RowBox[{
           RowBox[{
            RowBox[{"-", "sm"}], " ", 
            RowBox[{"(", 
             RowBox[{
              RowBox[{"sm", " ", 
               RowBox[{"(", 
                RowBox[{
                 RowBox[{"-", "1"}], "+", "\[Delta]"}], ")"}]}], "-", 
              "\[Delta]"}], ")"}], " ", 
            SuperscriptBox[
             RowBox[{"(", 
              RowBox[{"sm", "-", "\[Delta]", "+", 
               RowBox[{"sm", " ", "\[Delta]"}]}], ")"}], "4"]}], "+", 
           RowBox[{
            SuperscriptBox["h", "4"], " ", 
            SuperscriptBox["sf", "5"], " ", 
            SuperscriptBox[
             RowBox[{"(", 
              RowBox[{
               RowBox[{"-", "2"}], "+", "sm", "-", "\[Delta]", "+", 
               RowBox[{"sm", " ", "\[Delta]"}]}], ")"}], "4"], " ", 
            RowBox[{"(", 
             RowBox[{
              RowBox[{
               RowBox[{"-", 
                RowBox[{"(", 
                 RowBox[{
                  RowBox[{"-", "1"}], "+", "sm"}], ")"}]}], " ", 
               RowBox[{"(", 
                RowBox[{"1", "+", "\[Delta]"}], ")"}]}], "+", 
              RowBox[{"h", " ", 
               RowBox[{"(", 
                RowBox[{
                 RowBox[{"-", "2"}], "+", "sm", "-", "\[Delta]", "+", 
                 RowBox[{"sm", " ", "\[Delta]"}]}], ")"}]}]}], ")"}]}], "-", 
           RowBox[{
            SuperscriptBox["h", "2"], " ", 
            SuperscriptBox["sf", "4"], " ", 
            SuperscriptBox[
             RowBox[{"(", 
              RowBox[{
               RowBox[{"-", "2"}], "+", "sm", "-", "\[Delta]", "+", 
               RowBox[{"sm", " ", "\[Delta]"}]}], ")"}], "2"], " ", 
            RowBox[{"(", 
             RowBox[{
              RowBox[{
               RowBox[{"-", "12"}], " ", 
               SuperscriptBox[
                RowBox[{"(", 
                 RowBox[{
                  RowBox[{"-", "1"}], "+", "sm"}], ")"}], "2"], " ", 
               SuperscriptBox[
                RowBox[{"(", 
                 RowBox[{"1", "+", "\[Delta]"}], ")"}], "2"]}], "+", 
              RowBox[{
               SuperscriptBox["h", "2"], " ", 
               SuperscriptBox[
                RowBox[{"(", 
                 RowBox[{
                  RowBox[{"-", "2"}], "+", "sm", "-", "\[Delta]", "+", 
                  RowBox[{"sm", " ", "\[Delta]"}]}], ")"}], "2"], " ", 
               RowBox[{"(", 
                RowBox[{
                 RowBox[{
                  SuperscriptBox["sm", "2"], " ", 
                  RowBox[{"(", 
                   RowBox[{
                    RowBox[{"-", "1"}], "+", "\[Delta]"}], ")"}]}], "-", 
                 RowBox[{"2", " ", 
                  RowBox[{"(", 
                   RowBox[{"6", "+", "\[Delta]"}], ")"}]}], "+", 
                 RowBox[{"sm", " ", 
                  RowBox[{"(", 
                   RowBox[{"8", "+", "\[Delta]"}], ")"}]}]}], ")"}]}], "-", 
              RowBox[{"2", " ", "h", " ", 
               RowBox[{"(", 
                RowBox[{
                 RowBox[{"-", "1"}], "+", "sm"}], ")"}], " ", 
               RowBox[{"(", 
                RowBox[{"1", "+", "\[Delta]"}], ")"}], " ", 
               RowBox[{"(", 
                RowBox[{"24", "+", 
                 RowBox[{"14", " ", "\[Delta]"}], "+", 
                 SuperscriptBox["\[Delta]", "2"], "+", 
                 RowBox[{
                  SuperscriptBox["sm", "2"], " ", 
                  RowBox[{"(", 
                   RowBox[{"4", "+", 
                    RowBox[{"5", " ", "\[Delta]"}], "+", 
                    SuperscriptBox["\[Delta]", "2"]}], ")"}]}], "-", 
                 RowBox[{"sm", " ", 
                  RowBox[{"(", 
                   RowBox[{"20", "+", 
                    RowBox[{"19", " ", "\[Delta]"}], "+", 
                    RowBox[{"2", " ", 
                    SuperscriptBox["\[Delta]", "2"]}]}], ")"}]}]}], ")"}]}]}],
              ")"}]}], "+", 
           RowBox[{"2", " ", 
            SuperscriptBox["sf", "3"], " ", 
            RowBox[{"(", 
             RowBox[{
              RowBox[{
               RowBox[{"-", "16"}], " ", 
               SuperscriptBox[
                RowBox[{"(", 
                 RowBox[{
                  RowBox[{"-", "1"}], "+", "sm"}], ")"}], "3"], " ", 
               SuperscriptBox[
                RowBox[{"(", 
                 RowBox[{"1", "+", "\[Delta]"}], ")"}], "3"]}], "-", 
              RowBox[{
               SuperscriptBox["h", "2"], " ", 
               RowBox[{"(", 
                RowBox[{
                 RowBox[{"-", "1"}], "+", "sm"}], ")"}], " ", 
               RowBox[{"(", 
                RowBox[{"1", "+", "\[Delta]"}], ")"}], " ", 
               SuperscriptBox[
                RowBox[{"(", 
                 RowBox[{
                  RowBox[{"-", "2"}], "+", "sm", "-", "\[Delta]", "+", 
                  RowBox[{"sm", " ", "\[Delta]"}]}], ")"}], "2"], " ", 
               RowBox[{"(", 
                RowBox[{
                 RowBox[{"16", " ", 
                  RowBox[{"(", 
                   RowBox[{"3", "+", "\[Delta]"}], ")"}]}], "+", 
                 RowBox[{
                  SuperscriptBox["sm", "2"], " ", 
                  RowBox[{"(", 
                   RowBox[{"11", "+", 
                    RowBox[{"7", " ", "\[Delta]"}]}], ")"}]}], "-", 
                 RowBox[{"sm", " ", 
                  RowBox[{"(", 
                   RowBox[{"40", "+", 
                    RowBox[{"23", " ", "\[Delta]"}]}], ")"}]}]}], ")"}]}], 
              "+", 
              RowBox[{
               SuperscriptBox["h", "3"], " ", 
               SuperscriptBox[
                RowBox[{"(", 
                 RowBox[{
                  RowBox[{"-", "2"}], "+", "sm", "-", "\[Delta]", "+", 
                  RowBox[{"sm", " ", "\[Delta]"}]}], ")"}], "3"], " ", 
               RowBox[{"(", 
                RowBox[{
                 RowBox[{"8", " ", 
                  RowBox[{"(", 
                   RowBox[{"2", "+", "\[Delta]"}], ")"}]}], "+", 
                 RowBox[{
                  SuperscriptBox["sm", "2"], " ", 
                  RowBox[{"(", 
                   RowBox[{"11", "+", 
                    RowBox[{"7", " ", "\[Delta]"}], "-", 
                    RowBox[{"4", " ", 
                    SuperscriptBox["\[Delta]", "2"]}]}], ")"}]}], "+", 
                 RowBox[{"2", " ", 
                  SuperscriptBox["sm", "3"], " ", 
                  RowBox[{"(", 
                   RowBox[{
                    RowBox[{"-", "1"}], "+", 
                    SuperscriptBox["\[Delta]", "2"]}], ")"}]}], "+", 
                 RowBox[{"sm", " ", 
                  RowBox[{"(", 
                   RowBox[{
                    RowBox[{"-", "20"}], "-", 
                    RowBox[{"15", " ", "\[Delta]"}], "+", 
                    RowBox[{"2", " ", 
                    SuperscriptBox["\[Delta]", "2"]}]}], ")"}]}]}], ")"}]}], 
              "-", 
              RowBox[{"4", " ", "h", " ", 
               SuperscriptBox[
                RowBox[{"(", 
                 RowBox[{
                  RowBox[{"-", "1"}], "+", "sm"}], ")"}], "2"], " ", 
               SuperscriptBox[
                RowBox[{"(", 
                 RowBox[{"1", "+", "\[Delta]"}], ")"}], "2"], " ", 
               RowBox[{"(", 
                RowBox[{
                 RowBox[{"2", " ", 
                  RowBox[{"(", 
                   RowBox[{"12", "+", 
                    RowBox[{"8", " ", "\[Delta]"}], "+", 
                    SuperscriptBox["\[Delta]", "2"]}], ")"}]}], "+", 
                 RowBox[{
                  SuperscriptBox["sm", "2"], " ", 
                  RowBox[{"(", 
                   RowBox[{"5", "+", 
                    RowBox[{"7", " ", "\[Delta]"}], "+", 
                    RowBox[{"2", " ", 
                    SuperscriptBox["\[Delta]", "2"]}]}], ")"}]}], "-", 
                 RowBox[{"sm", " ", 
                  RowBox[{"(", 
                   RowBox[{"22", "+", 
                    RowBox[{"23", " ", "\[Delta]"}], "+", 
                    RowBox[{"4", " ", 
                    SuperscriptBox["\[Delta]", "2"]}]}], ")"}]}]}], ")"}]}]}],
              ")"}]}], "+", 
           RowBox[{"sf", " ", 
            SuperscriptBox[
             RowBox[{"(", 
              RowBox[{"sm", "-", "\[Delta]", "+", 
               RowBox[{"sm", " ", "\[Delta]"}]}], ")"}], "2"], " ", 
            RowBox[{"(", 
             RowBox[{
              RowBox[{"4", " ", "h", " ", 
               SuperscriptBox["sm", "4"], " ", 
               RowBox[{"(", 
                RowBox[{
                 RowBox[{"-", "1"}], "+", "\[Delta]"}], ")"}], " ", 
               SuperscriptBox[
                RowBox[{"(", 
                 RowBox[{"1", "+", "\[Delta]"}], ")"}], "2"]}], "+", 
              RowBox[{"sm", " ", 
               SuperscriptBox["\[Delta]", "2"], " ", 
               RowBox[{"(", 
                RowBox[{"3", "-", 
                 RowBox[{"13", " ", "h"}], "+", 
                 RowBox[{"3", " ", "\[Delta]"}], "-", 
                 RowBox[{"7", " ", "h", " ", "\[Delta]"}]}], ")"}]}], "+", 
              RowBox[{
               SuperscriptBox["\[Delta]", "2"], " ", 
               RowBox[{"(", 
                RowBox[{
                 RowBox[{"-", "1"}], "-", "\[Delta]", "+", 
                 RowBox[{"h", " ", 
                  RowBox[{"(", 
                   RowBox[{"2", "+", "\[Delta]"}], ")"}]}]}], ")"}]}], "+", 
              RowBox[{"3", " ", 
               SuperscriptBox["sm", "2"], " ", 
               RowBox[{"(", 
                RowBox[{"1", "+", "\[Delta]"}], ")"}], " ", 
               RowBox[{"(", 
                RowBox[{"3", "-", 
                 SuperscriptBox["\[Delta]", "2"], "+", 
                 RowBox[{"h", " ", 
                  RowBox[{"(", 
                   RowBox[{
                    RowBox[{"-", "6"}], "+", 
                    RowBox[{"3", " ", "\[Delta]"}], "+", 
                    RowBox[{"5", " ", 
                    SuperscriptBox["\[Delta]", "2"]}]}], ")"}]}]}], ")"}]}], 
              "-", 
              RowBox[{
               SuperscriptBox["sm", "3"], " ", 
               RowBox[{"(", 
                RowBox[{"1", "+", "\[Delta]"}], ")"}], " ", 
               RowBox[{"(", 
                RowBox[{"9", "-", 
                 SuperscriptBox["\[Delta]", "2"], "+", 
                 RowBox[{"h", " ", 
                  RowBox[{"(", 
                   RowBox[{
                    RowBox[{"-", "17"}], "+", 
                    RowBox[{"4", " ", "\[Delta]"}], "+", 
                    RowBox[{"13", " ", 
                    SuperscriptBox["\[Delta]", "2"]}]}], ")"}]}]}], ")"}]}]}],
              ")"}]}], "-", 
           RowBox[{"2", " ", 
            SuperscriptBox["sf", "2"], " ", 
            RowBox[{"(", 
             RowBox[{"sm", "-", "\[Delta]", "+", 
              RowBox[{"sm", " ", "\[Delta]"}]}], ")"}], " ", 
            RowBox[{"(", 
             RowBox[{
              RowBox[{"3", " ", 
               SuperscriptBox["h", "2"], " ", 
               SuperscriptBox["sm", "5"], " ", 
               RowBox[{"(", 
                RowBox[{
                 RowBox[{"-", "1"}], "+", "\[Delta]"}], ")"}], " ", 
               SuperscriptBox[
                RowBox[{"(", 
                 RowBox[{"1", "+", "\[Delta]"}], ")"}], "3"]}], "-", 
              RowBox[{"h", " ", 
               SuperscriptBox["sm", "4"], " ", 
               SuperscriptBox[
                RowBox[{"(", 
                 RowBox[{"1", "+", "\[Delta]"}], ")"}], "2"], " ", 
               RowBox[{"(", 
                RowBox[{"12", "+", 
                 RowBox[{"3", " ", "\[Delta]"}], "-", 
                 SuperscriptBox["\[Delta]", "2"], "+", 
                 RowBox[{"h", " ", 
                  RowBox[{"(", 
                   RowBox[{
                    RowBox[{"-", "24"}], "+", 
                    RowBox[{"3", " ", "\[Delta]"}], "+", 
                    RowBox[{"13", " ", 
                    SuperscriptBox["\[Delta]", "2"]}]}], ")"}]}]}], ")"}]}], 
              "+", 
              RowBox[{"\[Delta]", " ", 
               RowBox[{"(", 
                RowBox[{
                 RowBox[{"2", " ", 
                  SuperscriptBox[
                   RowBox[{"(", 
                    RowBox[{"1", "+", "\[Delta]"}], ")"}], "2"]}], "-", 
                 RowBox[{
                  SuperscriptBox["h", "2"], " ", 
                  RowBox[{"(", 
                   RowBox[{
                    RowBox[{"-", "2"}], "+", "\[Delta]"}], ")"}], " ", 
                  SuperscriptBox[
                   RowBox[{"(", 
                    RowBox[{"2", "+", "\[Delta]"}], ")"}], "2"]}], "+", 
                 RowBox[{"h", " ", 
                  RowBox[{"(", 
                   RowBox[{
                    RowBox[{"-", "8"}], "-", 
                    RowBox[{"10", " ", "\[Delta]"}], "-", 
                    SuperscriptBox["\[Delta]", "2"], "+", 
                    SuperscriptBox["\[Delta]", "3"]}], ")"}]}]}], ")"}]}], 
              "+", 
              RowBox[{
               SuperscriptBox["sm", "3"], " ", 
               RowBox[{"(", 
                RowBox[{"1", "+", "\[Delta]"}], ")"}], " ", 
               RowBox[{"(", 
                RowBox[{
                 RowBox[{
                  RowBox[{"-", "2"}], " ", 
                  RowBox[{"(", 
                   RowBox[{"7", "+", 
                    RowBox[{"8", " ", "\[Delta]"}], "+", 
                    SuperscriptBox["\[Delta]", "2"]}], ")"}]}], "+", 
                 RowBox[{"h", " ", 
                  RowBox[{"(", 
                   RowBox[{"64", "+", 
                    RowBox[{"68", " ", "\[Delta]"}], "+", 
                    RowBox[{"8", " ", 
                    SuperscriptBox["\[Delta]", "2"]}], "-", 
                    RowBox[{"4", " ", 
                    SuperscriptBox["\[Delta]", "3"]}]}], ")"}]}], "+", 
                 RowBox[{
                  SuperscriptBox["h", "2"], " ", 
                  RowBox[{"(", 
                   RowBox[{
                    RowBox[{"-", "74"}], "-", 
                    RowBox[{"55", " ", "\[Delta]"}], "+", 
                    RowBox[{"31", " ", 
                    SuperscriptBox["\[Delta]", "2"]}], "+", 
                    RowBox[{"22", " ", 
                    SuperscriptBox["\[Delta]", "3"]}]}], ")"}]}]}], ")"}]}], 
              "+", 
              RowBox[{
               SuperscriptBox["sm", "2"], " ", 
               RowBox[{"(", 
                RowBox[{
                 RowBox[{"2", " ", 
                  SuperscriptBox[
                   RowBox[{"(", 
                    RowBox[{"1", "+", "\[Delta]"}], ")"}], "2"], " ", 
                  RowBox[{"(", 
                   RowBox[{"14", "+", 
                    RowBox[{"3", " ", "\[Delta]"}]}], ")"}]}], "+", 
                 RowBox[{
                  SuperscriptBox["h", "2"], " ", 
                  RowBox[{"(", 
                   RowBox[{"104", "+", 
                    RowBox[{"166", " ", "\[Delta]"}], "+", 
                    RowBox[{"37", " ", 
                    SuperscriptBox["\[Delta]", "2"]}], "-", 
                    RowBox[{"45", " ", 
                    SuperscriptBox["\[Delta]", "3"]}], "-", 
                    RowBox[{"18", " ", 
                    SuperscriptBox["\[Delta]", "4"]}]}], ")"}]}], "+", 
                 RowBox[{"3", " ", "h", " ", 
                  RowBox[{"(", 
                   RowBox[{
                    RowBox[{"-", "36"}], "-", 
                    RowBox[{"69", " ", "\[Delta]"}], "-", 
                    RowBox[{"37", " ", 
                    SuperscriptBox["\[Delta]", "2"]}], "-", 
                    RowBox[{"2", " ", 
                    SuperscriptBox["\[Delta]", "3"]}], "+", 
                    RowBox[{"2", " ", 
                    SuperscriptBox["\[Delta]", "4"]}]}], ")"}]}]}], ")"}]}], 
              "+", 
              RowBox[{"sm", " ", 
               RowBox[{"(", 
                RowBox[{
                 RowBox[{
                  RowBox[{"-", "2"}], " ", 
                  SuperscriptBox[
                   RowBox[{"(", 
                    RowBox[{"1", "+", "\[Delta]"}], ")"}], "2"], " ", 
                  RowBox[{"(", 
                   RowBox[{"7", "+", 
                    RowBox[{"3", " ", "\[Delta]"}]}], ")"}]}], "+", 
                 RowBox[{"h", " ", 
                  RowBox[{"(", 
                   RowBox[{"56", "+", 
                    RowBox[{"110", " ", "\[Delta]"}], "+", 
                    RowBox[{"62", " ", 
                    SuperscriptBox["\[Delta]", "2"]}], "+", 
                    RowBox[{"4", " ", 
                    SuperscriptBox["\[Delta]", "3"]}], "-", 
                    RowBox[{"4", " ", 
                    SuperscriptBox["\[Delta]", "4"]}]}], ")"}]}], "+", 
                 RowBox[{
                  SuperscriptBox["h", "2"], " ", 
                  RowBox[{"(", 
                   RowBox[{
                    RowBox[{"-", "56"}], "-", 
                    RowBox[{"84", " ", "\[Delta]"}], "-", 
                    RowBox[{"22", " ", 
                    SuperscriptBox["\[Delta]", "2"]}], "+", 
                    RowBox[{"17", " ", 
                    SuperscriptBox["\[Delta]", "3"]}], "+", 
                    RowBox[{"7", " ", 
                    SuperscriptBox["\[Delta]", "4"]}]}], ")"}]}]}], ")"}]}]}],
              ")"}]}]}], ")"}]}], ")"}]}]}], "<", "0"}], ",", "Null", ",", 
    RowBox[{
     RowBox[{
      RowBox[{"(", 
       RowBox[{"sf", " ", 
        RowBox[{"(", 
         RowBox[{
          RowBox[{
           RowBox[{"-", 
            RowBox[{"(", 
             RowBox[{
              RowBox[{"-", "1"}], "+", "sm"}], ")"}]}], " ", 
           RowBox[{"(", 
            RowBox[{"1", "+", "\[Delta]"}], ")"}]}], "+", 
          RowBox[{"h", " ", 
           RowBox[{"(", 
            RowBox[{
             RowBox[{"-", "2"}], "+", "sm", "-", "\[Delta]", "+", 
             RowBox[{"sm", " ", "\[Delta]"}]}], ")"}]}]}], ")"}], " ", 
        RowBox[{"(", 
         RowBox[{
          RowBox[{"b", " ", 
           SuperscriptBox["h", "2"], " ", 
           SuperscriptBox["sf", "2"], " ", 
           SuperscriptBox[
            RowBox[{"(", 
             RowBox[{
              RowBox[{"-", "2"}], "+", "sm", "-", "\[Delta]", "+", 
              RowBox[{"sm", " ", "\[Delta]"}]}], ")"}], "2"]}], "+", 
          RowBox[{
           RowBox[{"(", 
            RowBox[{"sm", "-", "\[Delta]", "+", 
             RowBox[{"sm", " ", "\[Delta]"}]}], ")"}], " ", 
           RowBox[{"(", 
            RowBox[{
             RowBox[{
              RowBox[{"-", "b"}], " ", "\[Delta]"}], "+", 
             RowBox[{"sm", " ", 
              RowBox[{"(", 
               RowBox[{
                RowBox[{"-", "4"}], "+", "b", "+", 
                RowBox[{"b", " ", "\[Delta]"}]}], ")"}]}]}], ")"}]}], "-", 
          RowBox[{"2", " ", "sf", " ", 
           RowBox[{"(", 
            RowBox[{
             RowBox[{
              RowBox[{"-", "4"}], " ", 
              RowBox[{"(", 
               RowBox[{
                RowBox[{"-", "1"}], "+", "sm"}], ")"}], " ", 
              RowBox[{"(", 
               RowBox[{"1", "+", "\[Delta]"}], ")"}]}], "+", 
             RowBox[{"2", " ", "b", " ", 
              RowBox[{"(", 
               RowBox[{
                RowBox[{"-", "1"}], "+", "sm"}], ")"}], " ", 
              RowBox[{"(", 
               RowBox[{"1", "+", "\[Delta]"}], ")"}]}], "-", 
             RowBox[{"2", " ", "h", " ", 
              RowBox[{"(", 
               RowBox[{
                RowBox[{"-", "2"}], "+", "sm"}], ")"}], " ", 
              RowBox[{"(", 
               RowBox[{
                RowBox[{"-", "2"}], "+", "sm", "-", "\[Delta]", "+", 
                RowBox[{"sm", " ", "\[Delta]"}]}], ")"}]}], "+", 
             RowBox[{"b", " ", "h", " ", 
              SuperscriptBox[
               RowBox[{"(", 
                RowBox[{
                 RowBox[{"-", "2"}], "+", "sm", "-", "\[Delta]", "+", 
                 RowBox[{"sm", " ", "\[Delta]"}]}], ")"}], "2"]}]}], 
            ")"}]}]}], ")"}]}], ")"}], "/", 
      RowBox[{"(", 
       RowBox[{"b", " ", "\[Alpha]", " ", 
        RowBox[{"(", 
         RowBox[{
          RowBox[{
           RowBox[{"-", "sm"}], " ", 
           RowBox[{"(", 
            RowBox[{
             RowBox[{"sm", " ", 
              RowBox[{"(", 
               RowBox[{
                RowBox[{"-", "1"}], "+", "\[Delta]"}], ")"}]}], "-", 
             "\[Delta]"}], ")"}], " ", 
           SuperscriptBox[
            RowBox[{"(", 
             RowBox[{"sm", "-", "\[Delta]", "+", 
              RowBox[{"sm", " ", "\[Delta]"}]}], ")"}], "2"]}], "+", 
          RowBox[{
           SuperscriptBox["h", "2"], " ", 
           SuperscriptBox["sf", "3"], " ", 
           SuperscriptBox[
            RowBox[{"(", 
             RowBox[{
              RowBox[{"-", "2"}], "+", "sm", "-", "\[Delta]", "+", 
              RowBox[{"sm", " ", "\[Delta]"}]}], ")"}], "2"], " ", 
           RowBox[{"(", 
            RowBox[{
             RowBox[{
              RowBox[{"-", 
               RowBox[{"(", 
                RowBox[{
                 RowBox[{"-", "1"}], "+", "sm"}], ")"}]}], " ", 
              RowBox[{"(", 
               RowBox[{"1", "+", "\[Delta]"}], ")"}]}], "+", 
             RowBox[{"h", " ", 
              RowBox[{"(", 
               RowBox[{
                RowBox[{"-", "2"}], "+", "sm", "-", "\[Delta]", "+", 
                RowBox[{"sm", " ", "\[Delta]"}]}], ")"}]}]}], ")"}]}], "+", 
          RowBox[{
           SuperscriptBox["sf", "2"], " ", 
           RowBox[{"(", 
            RowBox[{
             RowBox[{"8", " ", 
              SuperscriptBox[
               RowBox[{"(", 
                RowBox[{
                 RowBox[{"-", "1"}], "+", "sm"}], ")"}], "2"], " ", 
              SuperscriptBox[
               RowBox[{"(", 
                RowBox[{"1", "+", "\[Delta]"}], ")"}], "2"]}], "+", 
             RowBox[{"2", " ", "h", " ", 
              RowBox[{"(", 
               RowBox[{"8", "-", 
                RowBox[{"11", " ", "sm"}], "+", 
                RowBox[{"3", " ", 
                 SuperscriptBox["sm", "2"]}]}], ")"}], " ", 
              RowBox[{"(", 
               RowBox[{"1", "+", "\[Delta]"}], ")"}], " ", 
              RowBox[{"(", 
               RowBox[{
                RowBox[{"-", "2"}], "+", "sm", "-", "\[Delta]", "+", 
                RowBox[{"sm", " ", "\[Delta]"}]}], ")"}]}], "-", 
             RowBox[{
              SuperscriptBox["h", "2"], " ", 
              RowBox[{"(", 
               RowBox[{
                RowBox[{"-", "8"}], "-", 
                RowBox[{"sm", " ", 
                 RowBox[{"(", 
                  RowBox[{
                   RowBox[{"-", "6"}], "+", "\[Delta]"}], ")"}]}], "+", 
                RowBox[{
                 SuperscriptBox["sm", "2"], " ", 
                 RowBox[{"(", 
                  RowBox[{
                   RowBox[{"-", "1"}], "+", "\[Delta]"}], ")"}]}]}], ")"}], 
              " ", 
              SuperscriptBox[
               RowBox[{"(", 
                RowBox[{
                 RowBox[{"-", "2"}], "+", "sm", "-", "\[Delta]", "+", 
                 RowBox[{"sm", " ", "\[Delta]"}]}], ")"}], "2"]}]}], ")"}]}], 
          "+", 
          RowBox[{"sf", " ", 
           RowBox[{"(", 
            RowBox[{"sm", "-", "\[Delta]", "+", 
             RowBox[{"sm", " ", "\[Delta]"}]}], ")"}], " ", 
           RowBox[{"(", 
            RowBox[{
             RowBox[{"2", " ", "h", " ", 
              SuperscriptBox["sm", "3"], " ", 
              RowBox[{"(", 
               RowBox[{
                RowBox[{"-", "1"}], "+", 
                SuperscriptBox["\[Delta]", "2"]}], ")"}]}], "+", 
             RowBox[{"\[Delta]", " ", 
              RowBox[{"(", 
               RowBox[{"1", "+", "\[Delta]", "-", 
                RowBox[{"h", " ", 
                 RowBox[{"(", 
                  RowBox[{"2", "+", "\[Delta]"}], ")"}]}]}], ")"}]}], "+", 
             RowBox[{
              SuperscriptBox["sm", "2"], " ", 
              RowBox[{"(", 
               RowBox[{
                RowBox[{"-", "5"}], "-", 
                RowBox[{"4", " ", "\[Delta]"}], "+", 
                SuperscriptBox["\[Delta]", "2"], "+", 
                RowBox[{"h", " ", 
                 RowBox[{"(", 
                  RowBox[{"9", "-", 
                   RowBox[{"5", " ", 
                    SuperscriptBox["\[Delta]", "2"]}]}], ")"}]}]}], ")"}]}], 
             "+", 
             RowBox[{"sm", " ", 
              RowBox[{"(", 
               RowBox[{"5", "+", 
                RowBox[{"3", " ", "\[Delta]"}], "-", 
                RowBox[{"2", " ", 
                 SuperscriptBox["\[Delta]", "2"]}], "+", 
                RowBox[{"2", " ", "h", " ", 
                 RowBox[{"(", 
                  RowBox[{
                   RowBox[{"-", "5"}], "+", "\[Delta]", "+", 
                   RowBox[{"2", " ", 
                    SuperscriptBox["\[Delta]", "2"]}]}], ")"}]}]}], ")"}]}]}],
             ")"}]}]}], ")"}]}], ")"}]}], "-", 
     RowBox[{
      RowBox[{"(", 
       RowBox[{
        RowBox[{"(", 
         RowBox[{
          RowBox[{"b", " ", 
           SuperscriptBox["h", "2"], " ", 
           SuperscriptBox["sf", "2"], " ", 
           SuperscriptBox[
            RowBox[{"(", 
             RowBox[{
              RowBox[{"-", "2"}], "+", "sm", "-", "\[Delta]", "+", 
              RowBox[{"sm", " ", "\[Delta]"}]}], ")"}], "2"]}], "+", 
          RowBox[{
           RowBox[{"(", 
            RowBox[{"sm", "-", "\[Delta]", "+", 
             RowBox[{"sm", " ", "\[Delta]"}]}], ")"}], " ", 
           RowBox[{"(", 
            RowBox[{
             RowBox[{
              RowBox[{"-", "b"}], " ", "\[Delta]"}], "+", 
             RowBox[{"sm", " ", 
              RowBox[{"(", 
               RowBox[{
                RowBox[{"-", "4"}], "+", "b", "+", 
                RowBox[{"b", " ", "\[Delta]"}]}], ")"}]}]}], ")"}]}], "-", 
          RowBox[{"2", " ", "sf", " ", 
           RowBox[{"(", 
            RowBox[{
             RowBox[{
              RowBox[{"-", "4"}], " ", 
              RowBox[{"(", 
               RowBox[{
                RowBox[{"-", "1"}], "+", "sm"}], ")"}], " ", 
              RowBox[{"(", 
               RowBox[{"1", "+", "\[Delta]"}], ")"}]}], "+", 
             RowBox[{"2", " ", "b", " ", 
              RowBox[{"(", 
               RowBox[{
                RowBox[{"-", "1"}], "+", "sm"}], ")"}], " ", 
              RowBox[{"(", 
               RowBox[{"1", "+", "\[Delta]"}], ")"}]}], "-", 
             RowBox[{"2", " ", "h", " ", 
              RowBox[{"(", 
               RowBox[{
                RowBox[{"-", "2"}], "+", "sm"}], ")"}], " ", 
              RowBox[{"(", 
               RowBox[{
                RowBox[{"-", "2"}], "+", "sm", "-", "\[Delta]", "+", 
                RowBox[{"sm", " ", "\[Delta]"}]}], ")"}]}], "+", 
             RowBox[{"b", " ", "h", " ", 
              SuperscriptBox[
               RowBox[{"(", 
                RowBox[{
                 RowBox[{"-", "2"}], "+", "sm", "-", "\[Delta]", "+", 
                 RowBox[{"sm", " ", "\[Delta]"}]}], ")"}], "2"]}]}], 
            ")"}]}]}], ")"}], " ", 
        RowBox[{"(", 
         RowBox[{
          RowBox[{"sm", " ", 
           RowBox[{"(", 
            RowBox[{
             RowBox[{"sm", " ", 
              RowBox[{"(", 
               RowBox[{
                RowBox[{"-", "1"}], "+", "\[Delta]"}], ")"}]}], "-", 
             "\[Delta]"}], ")"}], " ", 
           SuperscriptBox[
            RowBox[{"(", 
             RowBox[{"sm", "-", "\[Delta]", "+", 
              RowBox[{"sm", " ", "\[Delta]"}]}], ")"}], "2"]}], "+", 
          RowBox[{
           SuperscriptBox["sf", "2"], " ", 
           RowBox[{"(", 
            RowBox[{
             RowBox[{
              RowBox[{"-", "4"}], " ", 
              SuperscriptBox[
               RowBox[{"(", 
                RowBox[{
                 RowBox[{"-", "1"}], "+", "sm"}], ")"}], "2"], " ", 
              SuperscriptBox[
               RowBox[{"(", 
                RowBox[{"1", "+", "\[Delta]"}], ")"}], "2"]}], "+", 
             RowBox[{
              SuperscriptBox["h", "2"], " ", 
              RowBox[{"(", 
               RowBox[{
                RowBox[{"-", "2"}], "+", "sm"}], ")"}], " ", 
              RowBox[{"(", 
               RowBox[{"2", "+", 
                RowBox[{"sm", " ", 
                 RowBox[{"(", 
                  RowBox[{
                   RowBox[{"-", "1"}], "+", "\[Delta]"}], ")"}]}], "-", 
                "\[Delta]"}], ")"}], " ", 
              SuperscriptBox[
               RowBox[{"(", 
                RowBox[{
                 RowBox[{"-", "2"}], "+", "sm", "-", "\[Delta]", "+", 
                 RowBox[{"sm", " ", "\[Delta]"}]}], ")"}], "2"]}], "+", 
             RowBox[{"2", " ", "h", " ", 
              RowBox[{"(", 
               RowBox[{
                RowBox[{"-", "1"}], "+", "sm"}], ")"}], " ", 
              RowBox[{"(", 
               RowBox[{"1", "+", "\[Delta]"}], ")"}], " ", 
              RowBox[{"(", 
               RowBox[{
                RowBox[{"-", "8"}], "-", 
                RowBox[{"2", " ", "\[Delta]"}], "+", 
                SuperscriptBox["\[Delta]", "2"], "+", 
                RowBox[{"sm", " ", 
                 RowBox[{"(", 
                  RowBox[{"8", "+", 
                   RowBox[{"3", " ", "\[Delta]"}], "-", 
                   RowBox[{"2", " ", 
                    SuperscriptBox["\[Delta]", "2"]}]}], ")"}]}], "+", 
                RowBox[{
                 SuperscriptBox["sm", "2"], " ", 
                 RowBox[{"(", 
                  RowBox[{
                   RowBox[{"-", "2"}], "-", "\[Delta]", "+", 
                   SuperscriptBox["\[Delta]", "2"]}], ")"}]}]}], ")"}]}]}], 
            ")"}]}], "-", 
          RowBox[{"2", " ", "sf", " ", 
           RowBox[{"(", 
            RowBox[{"sm", "-", "\[Delta]", "+", 
             RowBox[{"sm", " ", "\[Delta]"}]}], ")"}], " ", 
           RowBox[{"(", 
            RowBox[{
             RowBox[{"h", " ", 
              SuperscriptBox["sm", "3"], " ", 
              RowBox[{"(", 
               RowBox[{
                RowBox[{"-", "1"}], "+", 
                SuperscriptBox["\[Delta]", "2"]}], ")"}]}], "+", 
             RowBox[{"\[Delta]", " ", 
              RowBox[{"(", 
               RowBox[{"1", "+", "\[Delta]", "-", 
                RowBox[{"h", " ", 
                 RowBox[{"(", 
                  RowBox[{"2", "+", "\[Delta]"}], ")"}]}]}], ")"}]}], "-", 
             RowBox[{
              SuperscriptBox["sm", "2"], " ", 
              RowBox[{"(", 
               RowBox[{"2", "+", "\[Delta]", "-", 
                SuperscriptBox["\[Delta]", "2"], "+", 
                RowBox[{"h", " ", 
                 RowBox[{"(", 
                  RowBox[{
                   RowBox[{"-", "4"}], "+", "\[Delta]", "+", 
                   RowBox[{"3", " ", 
                    SuperscriptBox["\[Delta]", "2"]}]}], ")"}]}]}], ")"}]}], 
             "+", 
             RowBox[{"sm", " ", 
              RowBox[{"(", 
               RowBox[{"2", "-", 
                RowBox[{"2", " ", 
                 SuperscriptBox["\[Delta]", "2"]}], "+", 
                RowBox[{"h", " ", 
                 RowBox[{"(", 
                  RowBox[{
                   RowBox[{"-", "4"}], "+", 
                   RowBox[{"3", " ", "\[Delta]"}], "+", 
                   RowBox[{"3", " ", 
                    SuperscriptBox["\[Delta]", "2"]}]}], ")"}]}]}], ")"}]}]}],
             ")"}]}]}], ")"}]}], ")"}], "/", 
      RowBox[{"(", 
       RowBox[{"b", " ", "\[Alpha]", " ", 
        RowBox[{"(", 
         RowBox[{
          RowBox[{
           RowBox[{"-", "sm"}], " ", 
           RowBox[{"(", 
            RowBox[{
             RowBox[{"sm", " ", 
              RowBox[{"(", 
               RowBox[{
                RowBox[{"-", "1"}], "+", "\[Delta]"}], ")"}]}], "-", 
             "\[Delta]"}], ")"}], " ", 
           SuperscriptBox[
            RowBox[{"(", 
             RowBox[{"sm", "-", "\[Delta]", "+", 
              RowBox[{"sm", " ", "\[Delta]"}]}], ")"}], "4"]}], "+", 
          RowBox[{
           SuperscriptBox["h", "4"], " ", 
           SuperscriptBox["sf", "5"], " ", 
           SuperscriptBox[
            RowBox[{"(", 
             RowBox[{
              RowBox[{"-", "2"}], "+", "sm", "-", "\[Delta]", "+", 
              RowBox[{"sm", " ", "\[Delta]"}]}], ")"}], "4"], " ", 
           RowBox[{"(", 
            RowBox[{
             RowBox[{
              RowBox[{"-", 
               RowBox[{"(", 
                RowBox[{
                 RowBox[{"-", "1"}], "+", "sm"}], ")"}]}], " ", 
              RowBox[{"(", 
               RowBox[{"1", "+", "\[Delta]"}], ")"}]}], "+", 
             RowBox[{"h", " ", 
              RowBox[{"(", 
               RowBox[{
                RowBox[{"-", "2"}], "+", "sm", "-", "\[Delta]", "+", 
                RowBox[{"sm", " ", "\[Delta]"}]}], ")"}]}]}], ")"}]}], "-", 
          RowBox[{
           SuperscriptBox["h", "2"], " ", 
           SuperscriptBox["sf", "4"], " ", 
           SuperscriptBox[
            RowBox[{"(", 
             RowBox[{
              RowBox[{"-", "2"}], "+", "sm", "-", "\[Delta]", "+", 
              RowBox[{"sm", " ", "\[Delta]"}]}], ")"}], "2"], " ", 
           RowBox[{"(", 
            RowBox[{
             RowBox[{
              RowBox[{"-", "12"}], " ", 
              SuperscriptBox[
               RowBox[{"(", 
                RowBox[{
                 RowBox[{"-", "1"}], "+", "sm"}], ")"}], "2"], " ", 
              SuperscriptBox[
               RowBox[{"(", 
                RowBox[{"1", "+", "\[Delta]"}], ")"}], "2"]}], "+", 
             RowBox[{
              SuperscriptBox["h", "2"], " ", 
              SuperscriptBox[
               RowBox[{"(", 
                RowBox[{
                 RowBox[{"-", "2"}], "+", "sm", "-", "\[Delta]", "+", 
                 RowBox[{"sm", " ", "\[Delta]"}]}], ")"}], "2"], " ", 
              RowBox[{"(", 
               RowBox[{
                RowBox[{
                 SuperscriptBox["sm", "2"], " ", 
                 RowBox[{"(", 
                  RowBox[{
                   RowBox[{"-", "1"}], "+", "\[Delta]"}], ")"}]}], "-", 
                RowBox[{"2", " ", 
                 RowBox[{"(", 
                  RowBox[{"6", "+", "\[Delta]"}], ")"}]}], "+", 
                RowBox[{"sm", " ", 
                 RowBox[{"(", 
                  RowBox[{"8", "+", "\[Delta]"}], ")"}]}]}], ")"}]}], "-", 
             RowBox[{"2", " ", "h", " ", 
              RowBox[{"(", 
               RowBox[{
                RowBox[{"-", "1"}], "+", "sm"}], ")"}], " ", 
              RowBox[{"(", 
               RowBox[{"1", "+", "\[Delta]"}], ")"}], " ", 
              RowBox[{"(", 
               RowBox[{"24", "+", 
                RowBox[{"14", " ", "\[Delta]"}], "+", 
                SuperscriptBox["\[Delta]", "2"], "+", 
                RowBox[{
                 SuperscriptBox["sm", "2"], " ", 
                 RowBox[{"(", 
                  RowBox[{"4", "+", 
                   RowBox[{"5", " ", "\[Delta]"}], "+", 
                   SuperscriptBox["\[Delta]", "2"]}], ")"}]}], "-", 
                RowBox[{"sm", " ", 
                 RowBox[{"(", 
                  RowBox[{"20", "+", 
                   RowBox[{"19", " ", "\[Delta]"}], "+", 
                   RowBox[{"2", " ", 
                    SuperscriptBox["\[Delta]", "2"]}]}], ")"}]}]}], ")"}]}]}],
             ")"}]}], "+", 
          RowBox[{"2", " ", 
           SuperscriptBox["sf", "3"], " ", 
           RowBox[{"(", 
            RowBox[{
             RowBox[{
              RowBox[{"-", "16"}], " ", 
              SuperscriptBox[
               RowBox[{"(", 
                RowBox[{
                 RowBox[{"-", "1"}], "+", "sm"}], ")"}], "3"], " ", 
              SuperscriptBox[
               RowBox[{"(", 
                RowBox[{"1", "+", "\[Delta]"}], ")"}], "3"]}], "-", 
             RowBox[{
              SuperscriptBox["h", "2"], " ", 
              RowBox[{"(", 
               RowBox[{
                RowBox[{"-", "1"}], "+", "sm"}], ")"}], " ", 
              RowBox[{"(", 
               RowBox[{"1", "+", "\[Delta]"}], ")"}], " ", 
              SuperscriptBox[
               RowBox[{"(", 
                RowBox[{
                 RowBox[{"-", "2"}], "+", "sm", "-", "\[Delta]", "+", 
                 RowBox[{"sm", " ", "\[Delta]"}]}], ")"}], "2"], " ", 
              RowBox[{"(", 
               RowBox[{
                RowBox[{"16", " ", 
                 RowBox[{"(", 
                  RowBox[{"3", "+", "\[Delta]"}], ")"}]}], "+", 
                RowBox[{
                 SuperscriptBox["sm", "2"], " ", 
                 RowBox[{"(", 
                  RowBox[{"11", "+", 
                   RowBox[{"7", " ", "\[Delta]"}]}], ")"}]}], "-", 
                RowBox[{"sm", " ", 
                 RowBox[{"(", 
                  RowBox[{"40", "+", 
                   RowBox[{"23", " ", "\[Delta]"}]}], ")"}]}]}], ")"}]}], "+", 
             RowBox[{
              SuperscriptBox["h", "3"], " ", 
              SuperscriptBox[
               RowBox[{"(", 
                RowBox[{
                 RowBox[{"-", "2"}], "+", "sm", "-", "\[Delta]", "+", 
                 RowBox[{"sm", " ", "\[Delta]"}]}], ")"}], "3"], " ", 
              RowBox[{"(", 
               RowBox[{
                RowBox[{"8", " ", 
                 RowBox[{"(", 
                  RowBox[{"2", "+", "\[Delta]"}], ")"}]}], "+", 
                RowBox[{
                 SuperscriptBox["sm", "2"], " ", 
                 RowBox[{"(", 
                  RowBox[{"11", "+", 
                   RowBox[{"7", " ", "\[Delta]"}], "-", 
                   RowBox[{"4", " ", 
                    SuperscriptBox["\[Delta]", "2"]}]}], ")"}]}], "+", 
                RowBox[{"2", " ", 
                 SuperscriptBox["sm", "3"], " ", 
                 RowBox[{"(", 
                  RowBox[{
                   RowBox[{"-", "1"}], "+", 
                   SuperscriptBox["\[Delta]", "2"]}], ")"}]}], "+", 
                RowBox[{"sm", " ", 
                 RowBox[{"(", 
                  RowBox[{
                   RowBox[{"-", "20"}], "-", 
                   RowBox[{"15", " ", "\[Delta]"}], "+", 
                   RowBox[{"2", " ", 
                    SuperscriptBox["\[Delta]", "2"]}]}], ")"}]}]}], ")"}]}], 
             "-", 
             RowBox[{"4", " ", "h", " ", 
              SuperscriptBox[
               RowBox[{"(", 
                RowBox[{
                 RowBox[{"-", "1"}], "+", "sm"}], ")"}], "2"], " ", 
              SuperscriptBox[
               RowBox[{"(", 
                RowBox[{"1", "+", "\[Delta]"}], ")"}], "2"], " ", 
              RowBox[{"(", 
               RowBox[{
                RowBox[{"2", " ", 
                 RowBox[{"(", 
                  RowBox[{"12", "+", 
                   RowBox[{"8", " ", "\[Delta]"}], "+", 
                   SuperscriptBox["\[Delta]", "2"]}], ")"}]}], "+", 
                RowBox[{
                 SuperscriptBox["sm", "2"], " ", 
                 RowBox[{"(", 
                  RowBox[{"5", "+", 
                   RowBox[{"7", " ", "\[Delta]"}], "+", 
                   RowBox[{"2", " ", 
                    SuperscriptBox["\[Delta]", "2"]}]}], ")"}]}], "-", 
                RowBox[{"sm", " ", 
                 RowBox[{"(", 
                  RowBox[{"22", "+", 
                   RowBox[{"23", " ", "\[Delta]"}], "+", 
                   RowBox[{"4", " ", 
                    SuperscriptBox["\[Delta]", "2"]}]}], ")"}]}]}], ")"}]}]}],
             ")"}]}], "+", 
          RowBox[{"sf", " ", 
           SuperscriptBox[
            RowBox[{"(", 
             RowBox[{"sm", "-", "\[Delta]", "+", 
              RowBox[{"sm", " ", "\[Delta]"}]}], ")"}], "2"], " ", 
           RowBox[{"(", 
            RowBox[{
             RowBox[{"4", " ", "h", " ", 
              SuperscriptBox["sm", "4"], " ", 
              RowBox[{"(", 
               RowBox[{
                RowBox[{"-", "1"}], "+", "\[Delta]"}], ")"}], " ", 
              SuperscriptBox[
               RowBox[{"(", 
                RowBox[{"1", "+", "\[Delta]"}], ")"}], "2"]}], "+", 
             RowBox[{"sm", " ", 
              SuperscriptBox["\[Delta]", "2"], " ", 
              RowBox[{"(", 
               RowBox[{"3", "-", 
                RowBox[{"13", " ", "h"}], "+", 
                RowBox[{"3", " ", "\[Delta]"}], "-", 
                RowBox[{"7", " ", "h", " ", "\[Delta]"}]}], ")"}]}], "+", 
             RowBox[{
              SuperscriptBox["\[Delta]", "2"], " ", 
              RowBox[{"(", 
               RowBox[{
                RowBox[{"-", "1"}], "-", "\[Delta]", "+", 
                RowBox[{"h", " ", 
                 RowBox[{"(", 
                  RowBox[{"2", "+", "\[Delta]"}], ")"}]}]}], ")"}]}], "+", 
             RowBox[{"3", " ", 
              SuperscriptBox["sm", "2"], " ", 
              RowBox[{"(", 
               RowBox[{"1", "+", "\[Delta]"}], ")"}], " ", 
              RowBox[{"(", 
               RowBox[{"3", "-", 
                SuperscriptBox["\[Delta]", "2"], "+", 
                RowBox[{"h", " ", 
                 RowBox[{"(", 
                  RowBox[{
                   RowBox[{"-", "6"}], "+", 
                   RowBox[{"3", " ", "\[Delta]"}], "+", 
                   RowBox[{"5", " ", 
                    SuperscriptBox["\[Delta]", "2"]}]}], ")"}]}]}], ")"}]}], 
             "-", 
             RowBox[{
              SuperscriptBox["sm", "3"], " ", 
              RowBox[{"(", 
               RowBox[{"1", "+", "\[Delta]"}], ")"}], " ", 
              RowBox[{"(", 
               RowBox[{"9", "-", 
                SuperscriptBox["\[Delta]", "2"], "+", 
                RowBox[{"h", " ", 
                 RowBox[{"(", 
                  RowBox[{
                   RowBox[{"-", "17"}], "+", 
                   RowBox[{"4", " ", "\[Delta]"}], "+", 
                   RowBox[{"13", " ", 
                    SuperscriptBox["\[Delta]", "2"]}]}], ")"}]}]}], ")"}]}]}],
             ")"}]}], "-", 
          RowBox[{"2", " ", 
           SuperscriptBox["sf", "2"], " ", 
           RowBox[{"(", 
            RowBox[{"sm", "-", "\[Delta]", "+", 
             RowBox[{"sm", " ", "\[Delta]"}]}], ")"}], " ", 
           RowBox[{"(", 
            RowBox[{
             RowBox[{"3", " ", 
              SuperscriptBox["h", "2"], " ", 
              SuperscriptBox["sm", "5"], " ", 
              RowBox[{"(", 
               RowBox[{
                RowBox[{"-", "1"}], "+", "\[Delta]"}], ")"}], " ", 
              SuperscriptBox[
               RowBox[{"(", 
                RowBox[{"1", "+", "\[Delta]"}], ")"}], "3"]}], "-", 
             RowBox[{"h", " ", 
              SuperscriptBox["sm", "4"], " ", 
              SuperscriptBox[
               RowBox[{"(", 
                RowBox[{"1", "+", "\[Delta]"}], ")"}], "2"], " ", 
              RowBox[{"(", 
               RowBox[{"12", "+", 
                RowBox[{"3", " ", "\[Delta]"}], "-", 
                SuperscriptBox["\[Delta]", "2"], "+", 
                RowBox[{"h", " ", 
                 RowBox[{"(", 
                  RowBox[{
                   RowBox[{"-", "24"}], "+", 
                   RowBox[{"3", " ", "\[Delta]"}], "+", 
                   RowBox[{"13", " ", 
                    SuperscriptBox["\[Delta]", "2"]}]}], ")"}]}]}], ")"}]}], 
             "+", 
             RowBox[{"\[Delta]", " ", 
              RowBox[{"(", 
               RowBox[{
                RowBox[{"2", " ", 
                 SuperscriptBox[
                  RowBox[{"(", 
                   RowBox[{"1", "+", "\[Delta]"}], ")"}], "2"]}], "-", 
                RowBox[{
                 SuperscriptBox["h", "2"], " ", 
                 RowBox[{"(", 
                  RowBox[{
                   RowBox[{"-", "2"}], "+", "\[Delta]"}], ")"}], " ", 
                 SuperscriptBox[
                  RowBox[{"(", 
                   RowBox[{"2", "+", "\[Delta]"}], ")"}], "2"]}], "+", 
                RowBox[{"h", " ", 
                 RowBox[{"(", 
                  RowBox[{
                   RowBox[{"-", "8"}], "-", 
                   RowBox[{"10", " ", "\[Delta]"}], "-", 
                   SuperscriptBox["\[Delta]", "2"], "+", 
                   SuperscriptBox["\[Delta]", "3"]}], ")"}]}]}], ")"}]}], "+", 
             RowBox[{
              SuperscriptBox["sm", "3"], " ", 
              RowBox[{"(", 
               RowBox[{"1", "+", "\[Delta]"}], ")"}], " ", 
              RowBox[{"(", 
               RowBox[{
                RowBox[{
                 RowBox[{"-", "2"}], " ", 
                 RowBox[{"(", 
                  RowBox[{"7", "+", 
                   RowBox[{"8", " ", "\[Delta]"}], "+", 
                   SuperscriptBox["\[Delta]", "2"]}], ")"}]}], "+", 
                RowBox[{"h", " ", 
                 RowBox[{"(", 
                  RowBox[{"64", "+", 
                   RowBox[{"68", " ", "\[Delta]"}], "+", 
                   RowBox[{"8", " ", 
                    SuperscriptBox["\[Delta]", "2"]}], "-", 
                   RowBox[{"4", " ", 
                    SuperscriptBox["\[Delta]", "3"]}]}], ")"}]}], "+", 
                RowBox[{
                 SuperscriptBox["h", "2"], " ", 
                 RowBox[{"(", 
                  RowBox[{
                   RowBox[{"-", "74"}], "-", 
                   RowBox[{"55", " ", "\[Delta]"}], "+", 
                   RowBox[{"31", " ", 
                    SuperscriptBox["\[Delta]", "2"]}], "+", 
                   RowBox[{"22", " ", 
                    SuperscriptBox["\[Delta]", "3"]}]}], ")"}]}]}], ")"}]}], 
             "+", 
             RowBox[{
              SuperscriptBox["sm", "2"], " ", 
              RowBox[{"(", 
               RowBox[{
                RowBox[{"2", " ", 
                 SuperscriptBox[
                  RowBox[{"(", 
                   RowBox[{"1", "+", "\[Delta]"}], ")"}], "2"], " ", 
                 RowBox[{"(", 
                  RowBox[{"14", "+", 
                   RowBox[{"3", " ", "\[Delta]"}]}], ")"}]}], "+", 
                RowBox[{
                 SuperscriptBox["h", "2"], " ", 
                 RowBox[{"(", 
                  RowBox[{"104", "+", 
                   RowBox[{"166", " ", "\[Delta]"}], "+", 
                   RowBox[{"37", " ", 
                    SuperscriptBox["\[Delta]", "2"]}], "-", 
                   RowBox[{"45", " ", 
                    SuperscriptBox["\[Delta]", "3"]}], "-", 
                   RowBox[{"18", " ", 
                    SuperscriptBox["\[Delta]", "4"]}]}], ")"}]}], "+", 
                RowBox[{"3", " ", "h", " ", 
                 RowBox[{"(", 
                  RowBox[{
                   RowBox[{"-", "36"}], "-", 
                   RowBox[{"69", " ", "\[Delta]"}], "-", 
                   RowBox[{"37", " ", 
                    SuperscriptBox["\[Delta]", "2"]}], "-", 
                   RowBox[{"2", " ", 
                    SuperscriptBox["\[Delta]", "3"]}], "+", 
                   RowBox[{"2", " ", 
                    SuperscriptBox["\[Delta]", "4"]}]}], ")"}]}]}], ")"}]}], 
             "+", 
             RowBox[{"sm", " ", 
              RowBox[{"(", 
               RowBox[{
                RowBox[{
                 RowBox[{"-", "2"}], " ", 
                 SuperscriptBox[
                  RowBox[{"(", 
                   RowBox[{"1", "+", "\[Delta]"}], ")"}], "2"], " ", 
                 RowBox[{"(", 
                  RowBox[{"7", "+", 
                   RowBox[{"3", " ", "\[Delta]"}]}], ")"}]}], "+", 
                RowBox[{"h", " ", 
                 RowBox[{"(", 
                  RowBox[{"56", "+", 
                   RowBox[{"110", " ", "\[Delta]"}], "+", 
                   RowBox[{"62", " ", 
                    SuperscriptBox["\[Delta]", "2"]}], "+", 
                   RowBox[{"4", " ", 
                    SuperscriptBox["\[Delta]", "3"]}], "-", 
                   RowBox[{"4", " ", 
                    SuperscriptBox["\[Delta]", "4"]}]}], ")"}]}], "+", 
                RowBox[{
                 SuperscriptBox["h", "2"], " ", 
                 RowBox[{"(", 
                  RowBox[{
                   RowBox[{"-", "56"}], "-", 
                   RowBox[{"84", " ", "\[Delta]"}], "-", 
                   RowBox[{"22", " ", 
                    SuperscriptBox["\[Delta]", "2"]}], "+", 
                   RowBox[{"17", " ", 
                    SuperscriptBox["\[Delta]", "3"]}], "+", 
                   RowBox[{"7", " ", 
                    SuperscriptBox["\[Delta]", "4"]}]}], ")"}]}]}], ")"}]}]}],
             ")"}]}]}], ")"}]}], ")"}]}]}]}], "]"}]}], "\[IndentingNewLine]", 
 RowBox[{
  RowBox[{"func2", "[", 
   RowBox[{"{", 
    RowBox[{"b_", ",", "\[Alpha]_"}], "}"}], "]"}], ":=", 
  RowBox[{"If", "[", 
   RowBox[{
    RowBox[{
     FractionBox[
      RowBox[{
       RowBox[{"-", "2"}], "+", "b"}], 
      RowBox[{"b", " ", "\[Alpha]"}]], ">", "0"}], ",", 
    FractionBox[
     RowBox[{
      RowBox[{"-", "2"}], "+", "b"}], 
     RowBox[{"b", " ", "\[Alpha]"}]], ",", "Null"}], 
   "]"}]}], "\[IndentingNewLine]", 
 RowBox[{
  RowBox[{"func3", "[", 
   RowBox[{"{", 
    RowBox[{
    "sf_", ",", " ", "sm_", ",", " ", "h_", ",", " ", "\[Delta]_", ",", 
     "\[Alpha]_", ",", " ", "c_", ",", " ", "b_"}], "}"}], "]"}], ":=", 
  RowBox[{"If", "[", 
   RowBox[{
    RowBox[{
     RowBox[{
      FractionBox[
       RowBox[{"2", "+", 
        RowBox[{"b", " ", 
         RowBox[{"(", 
          RowBox[{
           RowBox[{"-", "1"}], "+", "sf"}], ")"}], " ", 
         RowBox[{"(", 
          RowBox[{"1", "+", "\[Delta]"}], ")"}]}]}], 
       RowBox[{"b", " ", "\[Alpha]", " ", 
        RowBox[{"(", 
         RowBox[{
          RowBox[{"-", "2"}], "+", "sf", "+", "sm", "+", 
          RowBox[{"sf", " ", "\[Delta]"}], "-", 
          RowBox[{"sm", " ", "\[Delta]"}]}], ")"}]}]], "-", 
      FractionBox[
       RowBox[{
        RowBox[{"(", 
         RowBox[{
          RowBox[{"-", "1"}], "+", "sm"}], ")"}], " ", 
        RowBox[{"(", 
         RowBox[{
          RowBox[{"-", "1"}], "+", "\[Delta]"}], ")"}], " ", 
        RowBox[{"(", 
         RowBox[{"2", "+", 
          RowBox[{"b", " ", 
           RowBox[{"(", 
            RowBox[{
             RowBox[{"-", "1"}], "+", "sf"}], ")"}], " ", 
           RowBox[{"(", 
            RowBox[{"1", "+", "\[Delta]"}], ")"}]}]}], ")"}]}], 
       RowBox[{"b", " ", 
        RowBox[{"(", 
         RowBox[{
          RowBox[{"-", "1"}], "+", "sf"}], ")"}], " ", "\[Alpha]", " ", 
        RowBox[{"(", 
         RowBox[{"1", "+", "\[Delta]"}], ")"}], " ", 
        RowBox[{"(", 
         RowBox[{
          RowBox[{"-", "2"}], "+", "sf", "+", "sm", "+", 
          RowBox[{"sf", " ", "\[Delta]"}], "-", 
          RowBox[{"sm", " ", "\[Delta]"}]}], ")"}]}]]}], ">", "0"}], ",", 
    RowBox[{
     FractionBox[
      RowBox[{"2", "+", 
       RowBox[{"b", " ", 
        RowBox[{"(", 
         RowBox[{
          RowBox[{"-", "1"}], "+", "sf"}], ")"}], " ", 
        RowBox[{"(", 
         RowBox[{"1", "+", "\[Delta]"}], ")"}]}]}], 
      RowBox[{"b", " ", "\[Alpha]", " ", 
       RowBox[{"(", 
        RowBox[{
         RowBox[{"-", "2"}], "+", "sf", "+", "sm", "+", 
         RowBox[{"sf", " ", "\[Delta]"}], "-", 
         RowBox[{"sm", " ", "\[Delta]"}]}], ")"}]}]], "-", 
     FractionBox[
      RowBox[{
       RowBox[{"(", 
        RowBox[{
         RowBox[{"-", "1"}], "+", "sm"}], ")"}], " ", 
       RowBox[{"(", 
        RowBox[{
         RowBox[{"-", "1"}], "+", "\[Delta]"}], ")"}], " ", 
       RowBox[{"(", 
        RowBox[{"2", "+", 
         RowBox[{"b", " ", 
          RowBox[{"(", 
           RowBox[{
            RowBox[{"-", "1"}], "+", "sf"}], ")"}], " ", 
          RowBox[{"(", 
           RowBox[{"1", "+", "\[Delta]"}], ")"}]}]}], ")"}]}], 
      RowBox[{"b", " ", 
       RowBox[{"(", 
        RowBox[{
         RowBox[{"-", "1"}], "+", "sf"}], ")"}], " ", "\[Alpha]", " ", 
       RowBox[{"(", 
        RowBox[{"1", "+", "\[Delta]"}], ")"}], " ", 
       RowBox[{"(", 
        RowBox[{
         RowBox[{"-", "2"}], "+", "sf", "+", "sm", "+", 
         RowBox[{"sf", " ", "\[Delta]"}], "-", 
         RowBox[{"sm", " ", "\[Delta]"}]}], ")"}]}]]}], ",", "Null"}], 
   "]"}]}]}], "Input",
 CellChangeTimes->{{3.7840487451446867`*^9, 3.784048798096971*^9}, {
  3.7855723745168943`*^9, 3.785572375583008*^9}, {3.7855724553828163`*^9, 
  3.785572456146434*^9}, {3.800009315045189*^9, 3.800009315347846*^9}, {
  3.813930849580433*^9, 3.8139308505473623`*^9}},
 CellLabel->
  "In[1346]:=",ExpressionUUID->"e2a5396b-cee0-4f52-8545-db86db08f2f0"],

Cell["Produce plot", "Text",
 CellChangeTimes->{{3.813930855200848*^9, 
  3.8139308567422743`*^9}},ExpressionUUID->"d1f15f6d-3212-4137-81ef-\
697918aa6d83"],

Cell[CellGroupData[{

Cell[BoxData[{
 RowBox[{
  RowBox[{"testParameters", " ", "=", " ", 
   RowBox[{"{", 
    RowBox[{
     RowBox[{"h", "\[Rule]", "0.1"}], ",", 
     RowBox[{"\[Alpha]", "\[Rule]", 
      FractionBox["1", "1000"]}], ",", 
     RowBox[{"\[Delta]", "\[Rule]", "1"}], ",", 
     RowBox[{"c", "\[Rule]", "1"}], ",", 
     RowBox[{"sm", "\[Rule]", "0"}], ",", 
     RowBox[{"sf", "\[Rule]", "0.8"}]}], "}"}]}], 
  ";"}], "\[IndentingNewLine]", 
 RowBox[{
  RowBox[{"weakDriveParams", " ", "=", " ", 
   RowBox[{"{", 
    RowBox[{
     RowBox[{"h", "\[Rule]", "0"}], ",", 
     RowBox[{"\[Alpha]", "\[Rule]", 
      RowBox[{"10", "^", 
       RowBox[{"(", 
        RowBox[{"-", "3"}], ")"}]}]}], ",", 
     RowBox[{"\[Delta]", "\[Rule]", "0.25"}], ",", 
     RowBox[{"c", "\[Rule]", "1"}], ",", 
     RowBox[{"sm", "\[Rule]", "0"}], ",", 
     RowBox[{"sf", "\[Rule]", "0"}]}], "}"}]}], ";"}], "\[IndentingNewLine]", 
 RowBox[{"Plot", "[", 
  RowBox[{
   RowBox[{"{", 
    RowBox[{
     RowBox[{"func", "[", 
      RowBox[{"(", 
       RowBox[{
        RowBox[{"{", 
         RowBox[{
         "sf", ",", " ", "sm", ",", " ", "h", ",", " ", "\[Delta]", ",", 
          "\[Alpha]", ",", " ", "c", ",", " ", "b"}], "}"}], "/.", 
        "testParameters"}], ")"}], "]"}], ",", 
     RowBox[{"func3", "[", 
      RowBox[{"(", 
       RowBox[{
        RowBox[{"{", 
         RowBox[{
         "sf", ",", " ", "sm", ",", " ", "h", ",", " ", "\[Delta]", ",", 
          "\[Alpha]", ",", " ", "c", ",", " ", "b"}], "}"}], "/.", 
        "weakDriveParams"}], ")"}], "]"}], ",", 
     RowBox[{"func2", "[", 
      RowBox[{"(", 
       RowBox[{
        RowBox[{"{", 
         RowBox[{"b", ",", "\[Alpha]"}], "}"}], "/.", "testParameters"}], 
       ")"}], "]"}]}], "}"}], ",", 
   RowBox[{"{", 
    RowBox[{"b", ",", "1", ",", "5"}], "}"}], ",", 
   RowBox[{"AxesLabel", "\[Rule]", 
    RowBox[{"{", 
     RowBox[{"b", ",", "N"}], "}"}]}], ",", 
   RowBox[{"PlotLegends", "\[Rule]", 
    RowBox[{"{", 
     RowBox[{
     "\"\<strong drive at equilibrium\>\"", ",", 
      "\"\<weak drive at fixation\>\"", ",", "\"\<wild-type\>\""}], "}"}]}]}],
   "]"}]}], "Input",
 CellChangeTimes->{{3.7897328085491533`*^9, 3.789732811887224*^9}, {
   3.789732845930471*^9, 3.789732929152852*^9}, {3.789733220604877*^9, 
   3.78973323877112*^9}, {3.789733443007872*^9, 3.789733452694234*^9}, 
   3.789733498313501*^9, {3.789734583327293*^9, 3.789734583467265*^9}, {
   3.790078635126957*^9, 3.790078724087949*^9}, {3.790078756175313*^9, 
   3.790078761302916*^9}, {3.790083741063793*^9, 3.790083748936092*^9}, {
   3.7900844385563087`*^9, 3.7900844386899347`*^9}, {3.800008950016754*^9, 
   3.80000895067909*^9}, {3.800009207797346*^9, 3.800009279281457*^9}, 
   3.800009319162566*^9},
 CellLabel->
  "In[1349]:=",ExpressionUUID->"a22582de-5b0f-4ce0-a46a-bc9a52795dd9"],

Cell[BoxData[
 TemplateBox[{GraphicsBox[{{{{}, {}, 
       TagBox[{
         Directive[
          Opacity[1.], 
          RGBColor[0.368417, 0.506779, 0.709798], 
          AbsoluteThickness[1.6]], 
         LineBox[CompressedData["
1:eJwVjn0wlAkAxhdpfcV633ylkrs92bpw4tTqvA85Kt+VmL0IW9cltSxFd8Lu
a+/U9XWX2+lCajIu5c4sey7nI+Sjayokg0hluvXRZsm2Rbu5vT+eeeaZ+c1v
HuckwfZ9hgwGY6s+/3d6WYDv81daqtKl0VBCXaQq7wYmqGe0lKVrR6Y8eZSK
vBa8if9WSyW4aJnlSjWllmyzf6jVUmuUnLaOCAYu8MPUMNRRQnHERdPVi7HJ
P7K7iqmjqnt2tyzXmkOijS44TeiokbryjOEuEj9/fWWu1E5H5dn0X+qU2OJS
tzK5ermOiuWm6pq5Dqgto8P6XfS8TXXksysrMR4qI5x9dVTGeSuJoJqN0BKL
EjlfRzGGe5rZe9xB+N2WDcl11NApm7oTHlyU5noMcWI+UClvjiXPBgbjYMCy
/fxfFijFI6fNnEXRsL7zRrszk4HqmiLVy73xePteoEq2N4Dbpw9zHL/gY8eb
uH3MTgNgxZ4iRch+FJzpzRQKDeEe3Vc4p01Gp5y3PpIwwljSuvbTnoeRfTla
KL9lhEtdn9Wn16XC1yGJ92PiIoS19NnPsIVIjRltH2cZQ+Z6QuomTUeO9+T9
pY3GkCtCDllNZkB62Si3Jm4xbnoRafKlR8HuOVczYM4EkTNpsSooEw1n3H9K
/YOJ1wvFHOGOLKxTRpv3h5lgo59PeHfYMSy1mjZpmzcB8huORkR8C+NbRVUf
F5viXXtSEG/9d0jxqh80DTEDL/yJI2dlNiq3Jl1u0pjhgWg61nEuG5qXy1gK
qTmkEyZef9cfR+2OYKPCQAtoOnq5FpIc5G2RlMoVFhg5Ef+7cEMuPnqybeCq
ZAlOmvibDTzLha9PfqGDpyVuBvZFjQTnIW5l15xBryVctAqZoTQPmrunR1NF
VhhYu03lOZaHUEN3LodgQem51mHMXQQzFS/KIIkF8gBflpohAt2E68U3WWDR
Tbte1Isg2lkVk2Zqjb1WnpWLtCJw7/cHmSZaY3pX3OLnfmI8tQnMN/nLGm0x
W9wNc8Qw/WSjrT+TwOwPPi87asWYsh2f2BRPIGtsNp39WozYLidCWEUg0Vg1
VbKaRlVMUYHlAoHsg73Z4TwaLa3dOBxNokLg5X3kLI1Y9ZkwZjkJTrD/yW9u
0eh4EOAh+I2EIqXB1beZhleFhui/RiLgkH3FkhYaVvHxA+U3SCw8PBVR3arn
O9fxg2Qk4kodvebbaXgX3cuSNJD4vPhwYv49GkSAWZlRL4ndRUeOiQdp5C1v
+v7gIxJl91MSoh7TmNKkHejtI+FnzlqzaojGPzcG3a4OkPhSmr6vcVjP21TU
BYyQcDaLO655SkM1HtwlmiCx/1e2D19BY/ft97KJSRI3GttCPMZo3C2pKoxS
6v8Opm/W6Xf5djues4rE8Qy7YekEjfgGxYtmNYlHoU41d5Q07kkvdrpqSJzf
Ovqs8BUNblr49XNvSagt/p1JmKJh41IrSJgnUe7W2vhORUPMSN5+5z2JDZXX
stqmaUw/XuHtoSOhdBuzPTej9//ZY3fhAwl2K33hq9d6/1nJ/MICiQJBvs5l
lsZ/5QQZWA==
          "]]}, Annotation[#, "Charting`Private`Tag$97410#1"]& ], 
       TagBox[{
         Directive[
          Opacity[1.], 
          RGBColor[0.880722, 0.611041, 0.142051], 
          AbsoluteThickness[1.6]], 
         LineBox[CompressedData["
1:eJwV0nk41AkcBvBxjivH/BA9rmm3dFmSSVH7e6kQ1TrCNhsKLaEclS5lxvgV
2Rldpototcoo1i2Jjs0xhS2JNtSqh8Iazz6uGcfs7B/f530+z/M+719fZmis
7z5lGo3mo7j/06DsyKv716Sk8PXcfbPiNLKNHn7xX4XtFiVFCZYWkR9qlX/z
yZWSb01zmDEDw+TYgVvVv9+Wkg69W4W19BmSxoRYT6RwFu1hqLYqrM6ekrRW
SMnWayK5Rbo+9vhNr/cUS8nEpznDZcnmiFO/sq2wXUp2pR/2nd1tBc4DVohG
p5QsynwWckjKRJ7lodTGD1Ky0jqkJsRuCf4e/qfNdUJKfiQclTcKVyI09VOY
s5WMvFoUK7FnOiC8so2/KlFGLq69m93uDvSMV7JsT8pIb7PArf75gL9DTu9q
jozk+mawa+YBt/JoG8dzMrLn9fC0caULrEs1Wl1uykjNHiv3dVabMHTPVSew
UUZaXDBXNxvbgvjbVee4xjOkU8QgfSTRC6cv3Tz7tmqGDPZel+XN8AM165/G
Z8yRvHRBhkdPEHKT7d4vD5wn19YOLH1+NgzRrosiwrLk5PQzbY2E4ggYNE/M
7jxKg/kua9OqN9GYmomVRJkoQV2pUMc7MhZ+E0H76E1KkDQE1IiT45Em6Dia
kKCMPmbltQnmITRVsNd4M1TQ/GJN30n+YSTl+SdUNKjgrcMw2Th3BM6moeyM
vapguNorxZNHERfY//yLvhrE5XKO/ZljOM0aajV8pIbaS56s6bLjEOapJJcH
qaN2SvUWHp7At6/Ol3dr0yEoIvXTWk6iTmB7Ia6Yjk0Xl/n0VifBZsRfu2u7
BnJClXtjsk7BUG9M4w+ZBkYCuuO8jp+GWsONkm+yNSF+YONiuikZMQ4P32l6
aeGipctgvCYH97aG5tVPaiHc0SXJN4qDyeFF+gNCbQjdnH6NfcxBlZ+7yuXN
OgjivC7lmXLB8aByKwZ08GZk9sXnSC4W93p251ML0JOoFhNRzoWzY+plU3td
XE8Yl7XQUhBk0S5V6tDFLx7Se2NbUjAp5vfHcfWgI2dzW/gp2KZs67ScoY+K
uJ5VVm0p0JKwfZRC9eHJypxv1OKBVw9Rdo0+NuRGqit78sDdWRIYr2kAtx+a
eU9SeHBq7XLT3GsAeyfxiZFHPHww2pyqUW2AocAX1uIJHjSXrDd2oTMQUGP3
XH1ZKkaNv3zdEMzANktRaebuVPzYbslIKGFgdGq1YX9GKkoCb6TpyhnI1ho+
/6gmFU+e/omD/gTeh/OrGgcV/XHBdnoBARvn6bssBoXGNle72DsE1Hfd0R5T
2KFwktF1l0A9v9hPRFDQCw7uLigiYGzSc8nCSNFvsglzKyVQx/brVDOhwLrx
8hhVRyBSKNrbbk4p/kTrtkoHgWbPiKYdyylwzOrPRL8hcOXnBR/VVlAYnYzf
39FJgLa/oa9O4Zaid9/ldxOwXx0kWLFK0TcqfODaR6D/s2m1qi0FyRf3du5X
AiYHw9ZUOFDY/Wym9OuQYl/ALtnPoiDOKbnsM0IgwKrSwHIthQLfhWymhECB
qyg93ZFCcN3A58fjBEYHVroHOVF4KbzetGySgOFs56SBMwWn+B2i81MEysp1
+Y0KGy2tit0jI+BxxuWA7UYKKbQo3+YZAgk/uVV/UnjsL3OW3RyBY+6SwSvf
K/YrXy28Ok+gON9F7kUq9jMpmVxOYKDJdU6u8H8+lEzI
          "]]}, Annotation[#, "Charting`Private`Tag$97410#2"]& ], 
       TagBox[{
         Directive[
          Opacity[1.], 
          RGBColor[0.560181, 0.691569, 0.194885], 
          AbsoluteThickness[1.6]], 
         LineBox[CompressedData["
1:eJwVkXs01AkUx38MeTbG/AYhNKy2x1bY2GLw9SipFOJwZqNQFNZjKtPkOb9S
elBOk80jtBhRZ7EeK2mQWnRS65jyOImsFZOTdmMq0uzsH/fc8z3ncz733nPZ
4fH+h1UJgtijrP+7i6lHsQlBIKnTbGf413xX7vPUlnJl5o5WjMyZPHSV88u8
gmgEroQ0iH5iyVxzTXqkWssInH35Y+Xp7I+u3QdYs3E6BPwCTnp3eC7DIVXH
FDZdyd8cW7FSqANF+QEtKYPArkfDUcMhDDjIqq22GirnaVdJ+q4ZoOy4WzCN
TaB0KsnZa9ECLkZRfzdaEdALW7WL483G8N1LvCOrCdzUDbeLFFmCoRi41Lue
QPa0/eW4tdZIOx/X8bMDgZkl6wtBe9aBW1y47rvdBFwDulaPuNlBv3v+SwCf
gE3y+cWVezkYq20LGBIQ8Ow+PJX9Fwe1+efvhKQo9ymoF/bxneEbY7Y/Ukjg
g8813b4SF+TQt93jXyTQHl0+PpQEaAeKBAUlBKZ2GEovtbtDbdxOPtpFgF3b
8U7g4YWPi/Gz0StUcJkSW3Sr+WLffMhhjS4VVLXV5c9/DUZWTj+fx1NFtdST
mBQdRFcD93tfJg28VOHtRvYhpJQG8hraaDBSe1IS3xIFJ+Nw7sUwNayvWKIK
XkUjIWj80RRDHclu6e5penFIs5f1su6ro3LLDfem9ATkldLS60OWQWy/vYfx
OBHf9F2pH9TRAC9vL0tmegytOZtyE37VgLSJVyHddhwbZgJ1Bnw0sW3RndXN
PQGW3nvNhwuaEMfSfYr5SVBvK6yxKtKC8xpB7ugxPmI33xvS2qUN2VPLB0X8
k7jjHV4qkWsr/1nm8PSoAPK3JozJPB3wa3MNjNxOoWmfF03kqYs3yOH0WCQj
Y0dmScOkLkjfT0tOk8mwHNk5WJa5HNZVy3Oo0hQ4/XBGZGxHB2Ue8eFTWCpC
zJ99VumnI9Q+vnaIngb54+zxBKEeilIjOvkP0rBbdZPjWiYDncbfJvhGpEN7
luunEs6Ak3pkyj8L6TgtQXVRMwM6XapZ1O4MCANqghK19GEc0TKReDUDjr0D
27XC9NHenZIfNZKBUQPPM5q/62Nig6SOYyWElvVWQzcNJmImU5I0w4V4Zzg1
zQllwqKSVVxfJkTwMwsmr4YJ2QmX/OFXQtQEFWbRFUx49FrPzxhS6HjwJ+IC
SZASm0PNfhSC53J8NMQkPns7kJ1nKfzx1N0mvpKE16Zc+p1zFDZXyZkDt0hs
tC2YEmVR0AsNHRTfJmFi3r8l8oKS79oQsb2ORLTtrZ0aORTsC5+czGwlocox
cPS4RoHprl1O6ydxysxN8EsZhYyVkrMxUhLO7Yzgc+UU3skTj/Y/J+HqEW8Y
W0Gh5/bQxrJBEmmpc7b2lUreoOqu+ysSpqFjE4+qKcxOeT0TTpMo9ubgdR2F
/Z2LddMyEsl2tqYPf6Pw+EaNyG+GROwRyxfiegpifyMue5bE3n7WTEwjhdDW
yYn2ORJVY/Lrc80UnuQVdK2RK+9Jvnj8xV0Kjol7qq98JFF60N+muYWCweqm
+IMLJF6+yd2R3EqBIqL9uxeVvn+NKvbfp/B+2MzeZolEoPHb184Spb+xz+j6
VxLXdZkK8zal/3LmgkJBYlRw9YtCmf8D2h4fFw==
          "]]}, Annotation[#, "Charting`Private`Tag$97410#3"]& ]}}, {}}, {
    DisplayFunction -> Identity, Ticks -> {Automatic, Automatic}, 
     AxesOrigin -> {1., 0}, FrameTicks -> {{Automatic, 
        Charting`ScaledFrameTicks[{Identity, Identity}]}, {Automatic, 
        Charting`ScaledFrameTicks[{Identity, Identity}]}}, 
     GridLines -> {None, None}, DisplayFunction -> Identity, 
     PlotRangePadding -> {{
        Scaled[0.02], 
        Scaled[0.02]}, {
        Scaled[0.05], 
        Scaled[0.05]}}, PlotRangeClipping -> True, ImagePadding -> All, 
     DisplayFunction -> Identity, AspectRatio -> 
     NCache[GoldenRatio^(-1), 0.6180339887498948], Axes -> {True, True}, 
     AxesLabel -> {
       FormBox[
        TagBox["b", HoldForm], TraditionalForm], 
       FormBox["N", TraditionalForm]}, AxesOrigin -> {1., 0}, DisplayFunction :> 
     Identity, Frame -> {{False, False}, {False, False}}, 
     FrameLabel -> {{None, None}, {None, None}}, 
     FrameTicks -> {{Automatic, Automatic}, {Automatic, Automatic}}, 
     GridLines -> {None, None}, GridLinesStyle -> Directive[
       GrayLevel[0.5, 0.4]], 
     Method -> {
      "DefaultBoundaryStyle" -> Automatic, 
       "DefaultGraphicsInteraction" -> {
        "Version" -> 1.2, "TrackMousePosition" -> {True, False}, 
         "Effects" -> {
          "Highlight" -> {"ratio" -> 2}, "HighlightPoint" -> {"ratio" -> 2}, 
           "Droplines" -> {
            "freeformCursorMode" -> True, 
             "placement" -> {"x" -> "All", "y" -> "None"}}}}, 
       "DefaultMeshStyle" -> AbsolutePointSize[6], "ScalingFunctions" -> None,
        "CoordinatesToolOptions" -> {"DisplayFunction" -> ({
           (Identity[#]& )[
            Part[#, 1]], 
           (Identity[#]& )[
            Part[#, 2]]}& ), "CopiedValueFunction" -> ({
           (Identity[#]& )[
            Part[#, 1]], 
           (Identity[#]& )[
            Part[#, 2]]}& )}}, PlotRange -> {{1, 5}, {0., 679.9999947755102}},
      PlotRangeClipping -> True, PlotRangePadding -> {{
        Scaled[0.02], 
        Scaled[0.02]}, {
        Scaled[0.02], 
        Scaled[0.02]}}, Ticks -> {Automatic, Automatic}}],FormBox[
    FormBox[
     TemplateBox[{
      "\"strong drive at equilibrium\"", "\"weak drive at fixation\"", 
       "\"wild-type\""}, "LineLegend", DisplayFunction -> (FormBox[
        StyleBox[
         StyleBox[
          PaneBox[
           TagBox[
            GridBox[{{
               TagBox[
                GridBox[{{
                   GraphicsBox[{{
                    Directive[
                    EdgeForm[
                    Directive[
                    Opacity[0.3], 
                    GrayLevel[0]]], 
                    PointSize[0.5], 
                    Opacity[1.], 
                    RGBColor[0.368417, 0.506779, 0.709798], 
                    AbsoluteThickness[1.6]], {
                    LineBox[{{0, 10}, {20, 10}}]}}, {
                    Directive[
                    EdgeForm[
                    Directive[
                    Opacity[0.3], 
                    GrayLevel[0]]], 
                    PointSize[0.5], 
                    Opacity[1.], 
                    RGBColor[0.368417, 0.506779, 0.709798], 
                    AbsoluteThickness[1.6]], {}}}, AspectRatio -> Full, 
                    ImageSize -> {20, 10}, PlotRangePadding -> None, 
                    ImagePadding -> Automatic, 
                    BaselinePosition -> (Scaled[0.1] -> Baseline)], #}, {
                   GraphicsBox[{{
                    Directive[
                    EdgeForm[
                    Directive[
                    Opacity[0.3], 
                    GrayLevel[0]]], 
                    PointSize[0.5], 
                    Opacity[1.], 
                    RGBColor[0.880722, 0.611041, 0.142051], 
                    AbsoluteThickness[1.6]], {
                    LineBox[{{0, 10}, {20, 10}}]}}, {
                    Directive[
                    EdgeForm[
                    Directive[
                    Opacity[0.3], 
                    GrayLevel[0]]], 
                    PointSize[0.5], 
                    Opacity[1.], 
                    RGBColor[0.880722, 0.611041, 0.142051], 
                    AbsoluteThickness[1.6]], {}}}, AspectRatio -> Full, 
                    ImageSize -> {20, 10}, PlotRangePadding -> None, 
                    ImagePadding -> Automatic, 
                    BaselinePosition -> (Scaled[0.1] -> Baseline)], #2}, {
                   GraphicsBox[{{
                    Directive[
                    EdgeForm[
                    Directive[
                    Opacity[0.3], 
                    GrayLevel[0]]], 
                    PointSize[0.5], 
                    Opacity[1.], 
                    RGBColor[0.560181, 0.691569, 0.194885], 
                    AbsoluteThickness[1.6]], {
                    LineBox[{{0, 10}, {20, 10}}]}}, {
                    Directive[
                    EdgeForm[
                    Directive[
                    Opacity[0.3], 
                    GrayLevel[0]]], 
                    PointSize[0.5], 
                    Opacity[1.], 
                    RGBColor[0.560181, 0.691569, 0.194885], 
                    AbsoluteThickness[1.6]], {}}}, AspectRatio -> Full, 
                    ImageSize -> {20, 10}, PlotRangePadding -> None, 
                    ImagePadding -> Automatic, 
                    BaselinePosition -> (Scaled[0.1] -> Baseline)], #3}}, 
                 GridBoxAlignment -> {
                  "Columns" -> {Center, Left}, "Rows" -> {{Baseline}}}, 
                 AutoDelete -> False, 
                 GridBoxDividers -> {
                  "Columns" -> {{False}}, "Rows" -> {{False}}}, 
                 GridBoxItemSize -> {"Columns" -> {{All}}, "Rows" -> {{All}}},
                  GridBoxSpacings -> {
                  "Columns" -> {{0.5}}, "Rows" -> {{0.8}}}], "Grid"]}}, 
             GridBoxAlignment -> {"Columns" -> {{Left}}, "Rows" -> {{Top}}}, 
             AutoDelete -> False, 
             GridBoxItemSize -> {
              "Columns" -> {{Automatic}}, "Rows" -> {{Automatic}}}, 
             GridBoxSpacings -> {"Columns" -> {{1}}, "Rows" -> {{0}}}], 
            "Grid"], Alignment -> Left, AppearanceElements -> None, 
           ImageMargins -> {{5, 5}, {5, 5}}, ImageSizeAction -> 
           "ResizeToFit"], LineIndent -> 0, StripOnInput -> False], {
         FontFamily -> "Arial"}, Background -> Automatic, StripOnInput -> 
         False], TraditionalForm]& ), 
      InterpretationFunction :> (RowBox[{"LineLegend", "[", 
         RowBox[{
           RowBox[{"{", 
             RowBox[{
               RowBox[{"Directive", "[", 
                 RowBox[{
                   RowBox[{"Opacity", "[", "1.`", "]"}], ",", 
                   InterpretationBox[
                    ButtonBox[
                    TooltipBox[
                    GraphicsBox[{{
                    GrayLevel[0], 
                    RectangleBox[{0, 0}]}, {
                    GrayLevel[0], 
                    RectangleBox[{1, -1}]}, {
                    RGBColor[0.368417, 0.506779, 0.709798], 
                    RectangleBox[{0, -1}, {2, 1}]}}, DefaultBaseStyle -> 
                    "ColorSwatchGraphics", AspectRatio -> 1, Frame -> True, 
                    FrameStyle -> 
                    RGBColor[
                    0.24561133333333335`, 0.3378526666666667, 
                    0.4731986666666667], FrameTicks -> None, PlotRangePadding -> 
                    None, ImageSize -> 
                    Dynamic[{
                    Automatic, 1.35 CurrentValue["FontCapHeight"]/
                    AbsoluteCurrentValue[Magnification]}]], 
                    StyleBox[
                    RowBox[{"RGBColor", "[", 
                    RowBox[{"0.368417`", ",", "0.506779`", ",", "0.709798`"}],
                     "]"}], NumberMarks -> False]], Appearance -> None, 
                    BaseStyle -> {}, BaselinePosition -> Baseline, 
                    DefaultBaseStyle -> {}, ButtonFunction :> 
                    With[{Typeset`box$ = EvaluationBox[]}, 
                    If[
                    Not[
                    AbsoluteCurrentValue["Deployed"]], 
                    SelectionMove[Typeset`box$, All, Expression]; 
                    FrontEnd`Private`$ColorSelectorInitialAlpha = 1; 
                    FrontEnd`Private`$ColorSelectorInitialColor = 
                    RGBColor[0.368417, 0.506779, 0.709798]; 
                    FrontEnd`Private`$ColorSelectorUseMakeBoxes = True; 
                    MathLink`CallFrontEnd[
                    FrontEnd`AttachCell[Typeset`box$, 
                    FrontEndResource["RGBColorValueSelector"], {
                    0, {Left, Bottom}}, {Left, Top}, 
                    "ClosingActions" -> {
                    "SelectionDeparture", "ParentChanged", 
                    "EvaluatorQuit"}]]]], BaseStyle -> Inherited, Evaluator -> 
                    Automatic, Method -> "Preemptive"], 
                    RGBColor[0.368417, 0.506779, 0.709798], Editable -> False,
                     Selectable -> False], ",", 
                   RowBox[{"AbsoluteThickness", "[", "1.6`", "]"}]}], "]"}], 
               ",", 
               RowBox[{"Directive", "[", 
                 RowBox[{
                   RowBox[{"Opacity", "[", "1.`", "]"}], ",", 
                   InterpretationBox[
                    ButtonBox[
                    TooltipBox[
                    GraphicsBox[{{
                    GrayLevel[0], 
                    RectangleBox[{0, 0}]}, {
                    GrayLevel[0], 
                    RectangleBox[{1, -1}]}, {
                    RGBColor[0.880722, 0.611041, 0.142051], 
                    RectangleBox[{0, -1}, {2, 1}]}}, DefaultBaseStyle -> 
                    "ColorSwatchGraphics", AspectRatio -> 1, Frame -> True, 
                    FrameStyle -> 
                    RGBColor[
                    0.587148, 0.40736066666666665`, 0.09470066666666668], 
                    FrameTicks -> None, PlotRangePadding -> None, ImageSize -> 
                    Dynamic[{
                    Automatic, 1.35 CurrentValue["FontCapHeight"]/
                    AbsoluteCurrentValue[Magnification]}]], 
                    StyleBox[
                    RowBox[{"RGBColor", "[", 
                    RowBox[{"0.880722`", ",", "0.611041`", ",", "0.142051`"}],
                     "]"}], NumberMarks -> False]], Appearance -> None, 
                    BaseStyle -> {}, BaselinePosition -> Baseline, 
                    DefaultBaseStyle -> {}, ButtonFunction :> 
                    With[{Typeset`box$ = EvaluationBox[]}, 
                    If[
                    Not[
                    AbsoluteCurrentValue["Deployed"]], 
                    SelectionMove[Typeset`box$, All, Expression]; 
                    FrontEnd`Private`$ColorSelectorInitialAlpha = 1; 
                    FrontEnd`Private`$ColorSelectorInitialColor = 
                    RGBColor[0.880722, 0.611041, 0.142051]; 
                    FrontEnd`Private`$ColorSelectorUseMakeBoxes = True; 
                    MathLink`CallFrontEnd[
                    FrontEnd`AttachCell[Typeset`box$, 
                    FrontEndResource["RGBColorValueSelector"], {
                    0, {Left, Bottom}}, {Left, Top}, 
                    "ClosingActions" -> {
                    "SelectionDeparture", "ParentChanged", 
                    "EvaluatorQuit"}]]]], BaseStyle -> Inherited, Evaluator -> 
                    Automatic, Method -> "Preemptive"], 
                    RGBColor[0.880722, 0.611041, 0.142051], Editable -> False,
                     Selectable -> False], ",", 
                   RowBox[{"AbsoluteThickness", "[", "1.6`", "]"}]}], "]"}], 
               ",", 
               RowBox[{"Directive", "[", 
                 RowBox[{
                   RowBox[{"Opacity", "[", "1.`", "]"}], ",", 
                   InterpretationBox[
                    ButtonBox[
                    TooltipBox[
                    GraphicsBox[{{
                    GrayLevel[0], 
                    RectangleBox[{0, 0}]}, {
                    GrayLevel[0], 
                    RectangleBox[{1, -1}]}, {
                    RGBColor[0.560181, 0.691569, 0.194885], 
                    RectangleBox[{0, -1}, {2, 1}]}}, DefaultBaseStyle -> 
                    "ColorSwatchGraphics", AspectRatio -> 1, Frame -> True, 
                    FrameStyle -> 
                    RGBColor[
                    0.37345400000000006`, 0.461046, 0.12992333333333334`], 
                    FrameTicks -> None, PlotRangePadding -> None, ImageSize -> 
                    Dynamic[{
                    Automatic, 1.35 CurrentValue["FontCapHeight"]/
                    AbsoluteCurrentValue[Magnification]}]], 
                    StyleBox[
                    RowBox[{"RGBColor", "[", 
                    RowBox[{"0.560181`", ",", "0.691569`", ",", "0.194885`"}],
                     "]"}], NumberMarks -> False]], Appearance -> None, 
                    BaseStyle -> {}, BaselinePosition -> Baseline, 
                    DefaultBaseStyle -> {}, ButtonFunction :> 
                    With[{Typeset`box$ = EvaluationBox[]}, 
                    If[
                    Not[
                    AbsoluteCurrentValue["Deployed"]], 
                    SelectionMove[Typeset`box$, All, Expression]; 
                    FrontEnd`Private`$ColorSelectorInitialAlpha = 1; 
                    FrontEnd`Private`$ColorSelectorInitialColor = 
                    RGBColor[0.560181, 0.691569, 0.194885]; 
                    FrontEnd`Private`$ColorSelectorUseMakeBoxes = True; 
                    MathLink`CallFrontEnd[
                    FrontEnd`AttachCell[Typeset`box$, 
                    FrontEndResource["RGBColorValueSelector"], {
                    0, {Left, Bottom}}, {Left, Top}, 
                    "ClosingActions" -> {
                    "SelectionDeparture", "ParentChanged", 
                    "EvaluatorQuit"}]]]], BaseStyle -> Inherited, Evaluator -> 
                    Automatic, Method -> "Preemptive"], 
                    RGBColor[0.560181, 0.691569, 0.194885], Editable -> False,
                     Selectable -> False], ",", 
                   RowBox[{"AbsoluteThickness", "[", "1.6`", "]"}]}], "]"}]}],
              "}"}], ",", 
           RowBox[{"{", 
             RowBox[{#, ",", #2, ",", #3}], "}"}], ",", 
           RowBox[{"LegendMarkers", "\[Rule]", "None"}], ",", 
           RowBox[{"LabelStyle", "\[Rule]", 
             RowBox[{"{", "}"}]}], ",", 
           RowBox[{"LegendLayout", "\[Rule]", "\"Column\""}]}], "]"}]& ), 
      Editable -> True], TraditionalForm], TraditionalForm]},
  "Legended",
  DisplayFunction->(GridBox[{{
      TagBox[
       ItemBox[
        PaneBox[
         TagBox[#, "SkipImageSizeLevel"], Alignment -> {Center, Baseline}, 
         BaselinePosition -> Baseline], DefaultBaseStyle -> "Labeled"], 
       "SkipImageSizeLevel"], 
      ItemBox[#2, DefaultBaseStyle -> "LabeledLabel"]}}, 
    GridBoxAlignment -> {"Columns" -> {{Center}}, "Rows" -> {{Center}}}, 
    AutoDelete -> False, GridBoxItemSize -> Automatic, 
    BaselinePosition -> {1, 1}]& ),
  Editable->True,
  InterpretationFunction->(RowBox[{"Legended", "[", 
     RowBox[{#, ",", 
       RowBox[{"Placed", "[", 
         RowBox[{#2, ",", "After"}], "]"}]}], "]"}]& )]], "Output",
 CellChangeTimes->{{3.789732862523242*^9, 3.7897328683434677`*^9}, {
   3.789732901600594*^9, 3.789732906917636*^9}, {3.789733026250841*^9, 
   3.789733042026977*^9}, 3.789733080539659*^9, {3.78973322157124*^9, 
   3.789733239211602*^9}, {3.7897334440408583`*^9, 3.7897334533115797`*^9}, 
   3.789733506292223*^9, 3.789734584216867*^9, {3.79007861463617*^9, 
   3.7900787247000027`*^9}, 3.790078762784197*^9, 3.7900844394608393`*^9, 
   3.795174683469287*^9, 3.800008967069524*^9, 3.80000903406283*^9, {
   3.800009214155257*^9, 3.800009229717184*^9}, {3.800009263015492*^9, 
   3.8000092848896008`*^9}, {3.800009321365273*^9, 3.8000093348560658`*^9}, 
   3.8002682059851093`*^9, {3.813930831728199*^9, 3.8139308414845877`*^9}, 
   3.8140817894275427`*^9, 3.8141894022019873`*^9, 3.81419596621653*^9, 
   3.81419651533729*^9},
 CellLabel->
  "Out[1351]=",ExpressionUUID->"7e6aa397-65c5-41f0-ac8c-0258435f0c59"]
}, Open  ]]
}, Closed]]
}, Closed]],

Cell[CellGroupData[{

Cell[TextData[{
 "Allele Frequency and Population Size Dynamics - females mate with two males \
(",
 Cell[BoxData[
  FormBox[
   RowBox[{
    SubscriptBox["\[Lambda]", "f"], "=", "2"}], TraditionalForm]],
  FormatType->"TraditionalForm",ExpressionUUID->
  "e69cc557-ca21-40f2-b4fd-ff1622f9eaea"],
 ")"
}], "Section",
 CellChangeTimes->{{3.781463311644246*^9, 3.781463316031954*^9}, {
  3.81401133197186*^9, 3.814011335758626*^9}, {3.814018589445348*^9, 
  3.814018627458487*^9}},ExpressionUUID->"a3d9aa4f-4097-4134-9b5c-\
9a4fe1d5ffb9"],

Cell[CellGroupData[{

Cell["Recursion equations", "Subsection",
 CellChangeTimes->{{3.781874873824012*^9, 
  3.781874878613985*^9}},ExpressionUUID->"d6a593b5-fc9a-4ff0-b568-\
77f6abb26a87"],

Cell["\<\
In this section, each female mates with two males. The probability of \
choosing each male genotype is assumed to be random such that it occurs in \
proportion to the proportion of males with each genotype. These \
recursion/difference equations track the mating combinations of female and \
two male genotypes that can produce offspring of each genotype. 
\
\>", "Text",
 CellChangeTimes->{{3.814082740615233*^9, 
  3.81408288606927*^9}},ExpressionUUID->"69f9f8a0-3224-4ce1-95a7-\
20e790020c64"],

Cell[BoxData[{
 RowBox[{
  RowBox[{"DDfjuveniles2", " ", "=", 
   RowBox[{"b", "*", 
    RowBox[{"(", 
     RowBox[{"1", "-", 
      RowBox[{"\[Alpha]", " ", "totAdults"}]}], ")"}], 
    RowBox[{"(", 
     RowBox[{
      RowBox[{"DDf", 
       RowBox[{"(", 
        RowBox[{
         FractionBox[
          RowBox[{" ", 
           RowBox[{"Dm", "^", "2"}]}], 
          RowBox[{"2", 
           RowBox[{
            RowBox[{"(", 
             RowBox[{"Dm", " ", "+", " ", "dm"}], ")"}], "^", "2"}]}]], " ", 
         "+", 
         RowBox[{"2", "  ", 
          FractionBox[
           RowBox[{"Dm", " ", "dm"}], 
           RowBox[{
            RowBox[{"(", 
             RowBox[{"Dm", " ", "+", " ", "dm"}], ")"}], "^", "2"}]], 
          RowBox[{"(", 
           FractionBox[
            FractionBox["1", "2"], 
            RowBox[{"(", 
             RowBox[{"1", "+", "c"}], ")"}]], ")"}]}]}], ")"}]}], "+", 
      "\[IndentingNewLine]", 
      RowBox[{
       FractionBox["Ddf", "2"], 
       RowBox[{"(", 
        RowBox[{
         RowBox[{
          FractionBox[
           RowBox[{" ", 
            RowBox[{"Dm", "^", "2"}]}], 
           RowBox[{
            RowBox[{"(", 
             RowBox[{"Dm", " ", "+", " ", "dm"}], ")"}], "^", "2"}]], " ", 
          RowBox[{"(", 
           FractionBox["1", "2"], ")"}]}], "+", 
         RowBox[{
          FractionBox[
           RowBox[{"2", "Dm", " ", "dm"}], 
           RowBox[{
            RowBox[{"(", 
             RowBox[{"Dm", " ", "+", " ", "dm"}], ")"}], "^", "2"}]], " ", 
          RowBox[{"(", 
           FractionBox[
            FractionBox["1", "2"], 
            RowBox[{"(", 
             RowBox[{"1", "+", "c"}], ")"}]], ")"}]}]}], ")"}]}]}], ")"}]}]}],
   " ", ";"}], "\[IndentingNewLine]", 
 RowBox[{
  RowBox[{
   RowBox[{"Ddfjuveniles2", " ", "=", 
    RowBox[{"b", "*", 
     RowBox[{"(", 
      RowBox[{"1", "-", 
       RowBox[{"\[Alpha]", " ", "totAdults"}]}], ")"}], 
     RowBox[{"(", 
      RowBox[{
       RowBox[{"DDf", 
        RowBox[{"(", 
         RowBox[{
          RowBox[{
           FractionBox[
            RowBox[{"dm", "^", "2"}], 
            RowBox[{
             RowBox[{"(", 
              RowBox[{"Dm", "+", "dm"}], ")"}], "^", "2"}]], 
           RowBox[{"(", 
            FractionBox[
             RowBox[{"(", 
              RowBox[{"1", "+", "\[Delta]"}], ")"}], "2"], ")"}]}], " ", "+", 
          RowBox[{
           FractionBox[
            RowBox[{" ", 
             RowBox[{"2", " ", "dm", " ", "Dm"}]}], 
            RowBox[{
             RowBox[{"(", 
              RowBox[{"Dm", "+", "dm"}], ")"}], "^", "2"}]], " ", 
           RowBox[{"(", 
            FractionBox[
             RowBox[{"c", 
              RowBox[{"(", 
               FractionBox[
                RowBox[{"1", "+", "\[Delta]"}], "2"], ")"}]}], 
             RowBox[{"(", 
              RowBox[{"1", "+", "c"}], ")"}]], ")"}]}]}], ")"}]}], " ", "+", 
       "\[IndentingNewLine]", 
       RowBox[{
        FractionBox["Ddf", "2"], 
        RowBox[{"(", 
         RowBox[{
          RowBox[{
           FractionBox[
            RowBox[{"Dm", "^", "2"}], 
            RowBox[{
             RowBox[{"(", 
              RowBox[{"Dm", "+", "dm"}], ")"}], "^", "2"}]], " ", 
           RowBox[{"(", 
            FractionBox[
             RowBox[{" ", "1"}], "2"], " ", ")"}]}], "+", "  ", 
          RowBox[{
           FractionBox[
            RowBox[{"dm", "^", "2"}], 
            RowBox[{
             RowBox[{"(", 
              RowBox[{"Dm", "+", "dm"}], ")"}], "^", "2"}]], 
           RowBox[{"(", 
            FractionBox[
             RowBox[{"(", 
              RowBox[{"1", "+", "\[Delta]"}], ")"}], "2"], ")"}]}], " ", "+", 
          RowBox[{
           FractionBox[
            RowBox[{"2", "  ", "Dm", " ", "dm"}], 
            RowBox[{
             RowBox[{"(", 
              RowBox[{"Dm", "+", "dm"}], ")"}], "^", "2"}]], " ", 
           RowBox[{"(", 
            RowBox[{"(", 
             FractionBox[
              RowBox[{
               FractionBox["1", "2"], "+", 
               RowBox[{"c", 
                RowBox[{"(", 
                 FractionBox[
                  RowBox[{"1", "+", "\[Delta]"}], "2"], ")"}]}]}], 
              RowBox[{"(", 
               RowBox[{"1", "+", "c"}], ")"}]], ")"}], ")"}]}]}], " ", 
         ")"}]}], "+", "\[IndentingNewLine]", 
       RowBox[{"ddf", 
        RowBox[{"(", 
         RowBox[{
          RowBox[{
           FractionBox[
            RowBox[{" ", 
             RowBox[{"Dm", "^", "2"}]}], 
            RowBox[{
             RowBox[{"(", 
              RowBox[{"Dm", "+", "dm"}], ")"}], "^", "2"}]], " ", 
           FractionBox["1", "2"]}], " ", "+", " ", 
          RowBox[{
           FractionBox[
            RowBox[{"2", " ", "Dm", " ", "dm"}], 
            RowBox[{
             RowBox[{"(", 
              RowBox[{"Dm", "+", "dm"}], ")"}], "^", "2"}]], " ", 
           FractionBox[
            FractionBox["1", "2"], 
            RowBox[{"(", 
             RowBox[{"1", "+", "c"}], ")"}]]}]}], ")"}]}]}], ")"}]}]}], ";"}],
   " "}], "\[IndentingNewLine]", 
 RowBox[{
  RowBox[{"ddfjuveniles2", "=", 
   RowBox[{"b", "*", 
    RowBox[{"(", 
     RowBox[{"1", "-", 
      RowBox[{"\[Alpha]", " ", "totAdults"}]}], ")"}], 
    RowBox[{"(", 
     RowBox[{
      RowBox[{
       FractionBox["Ddf", "2"], 
       RowBox[{"(", 
        RowBox[{
         RowBox[{
          FractionBox[
           RowBox[{"dm", "^", "2"}], 
           RowBox[{
            RowBox[{"(", 
             RowBox[{"Dm", "+", "dm"}], ")"}], "^", "2"}]], " ", 
          RowBox[{"(", 
           FractionBox[
            RowBox[{"(", 
             RowBox[{"1", "+", "\[Delta]"}], ")"}], "2"], ")"}]}], " ", "+", 
         " ", 
         RowBox[{
          FractionBox[
           RowBox[{"2", "Dm", " ", "dm"}], 
           RowBox[{
            RowBox[{"(", 
             RowBox[{"Dm", "+", "dm"}], ")"}], "^", "2"}]], " ", 
          RowBox[{"(", 
           FractionBox[
            RowBox[{"c", 
             RowBox[{"(", 
              FractionBox[
               RowBox[{"1", "+", "\[Delta]"}], "2"], ")"}]}], 
            RowBox[{
             RowBox[{"(", 
              RowBox[{"1", "+", "c"}], ")"}], " "}]], ")"}]}]}], ")"}]}], " ",
       "+", "\[IndentingNewLine]", 
      RowBox[{"ddf", 
       RowBox[{"(", 
        RowBox[{
         RowBox[{
          FractionBox[
           RowBox[{"dm", "^", "2"}], 
           RowBox[{
            RowBox[{"(", 
             RowBox[{"Dm", "+", "dm"}], ")"}], "^", "2"}]], " ", 
          RowBox[{"(", 
           FractionBox[
            RowBox[{"(", 
             RowBox[{"1", "+", "\[Delta]"}], ")"}], "2"], ")"}]}], " ", "+", 
         RowBox[{
          FractionBox[
           RowBox[{"2", " ", "Dm", " ", "dm"}], 
           RowBox[{
            RowBox[{"(", 
             RowBox[{"Dm", "+", "dm"}], ")"}], "^", "2"}]], " ", 
          RowBox[{"(", 
           FractionBox[
            RowBox[{"c", 
             RowBox[{"(", 
              FractionBox[
               RowBox[{"1", "+", "\[Delta]"}], "2"], ")"}]}], 
            RowBox[{"(", 
             RowBox[{"1", "+", "c"}], ")"}]], ")"}]}]}], ")"}]}]}], ")"}]}]}],
   ";"}], "\[IndentingNewLine]", 
 RowBox[{
  RowBox[{"Dmjuveniles2", " ", "=", 
   RowBox[{"b", "*", 
    RowBox[{"(", 
     RowBox[{"1", "-", 
      RowBox[{"\[Alpha]", " ", "totAdults"}]}], ")"}], 
    RowBox[{"(", 
     RowBox[{
      RowBox[{"DDf", 
       RowBox[{"(", 
        RowBox[{
         RowBox[{
          FractionBox[
           RowBox[{"Dm", "^", "2"}], 
           RowBox[{
            RowBox[{"(", 
             RowBox[{"Dm", "+", "dm"}], ")"}], "^", "2"}]], " ", 
          FractionBox[
           RowBox[{" ", "1"}], "2"]}], " ", "+", " ", 
         RowBox[{
          FractionBox[
           RowBox[{"dm", "^", "2"}], 
           RowBox[{
            RowBox[{"(", 
             RowBox[{"Dm", "+", "dm"}], ")"}], "^", "2"}]], " ", 
          RowBox[{"(", 
           FractionBox[
            RowBox[{"(", 
             RowBox[{"1", "-", "\[Delta]"}], ")"}], "2"], ")"}]}], " ", "+", 
         " ", 
         RowBox[{
          FractionBox[
           RowBox[{"2", " ", "Dm", " ", "dm"}], 
           RowBox[{
            RowBox[{"(", 
             RowBox[{"Dm", "+", "dm"}], ")"}], "^", "2"}]], " ", 
          RowBox[{"(", 
           FractionBox[
            RowBox[{
             FractionBox["1", "2"], "+", 
             RowBox[{"c", 
              RowBox[{"(", " ", 
               FractionBox[
                RowBox[{"1", "-", "\[Delta]"}], "2"], ")"}]}]}], 
            RowBox[{"(", 
             RowBox[{"1", "+", "c"}], ")"}]], ")"}]}]}], ")"}]}], " ", "+", 
      "\[IndentingNewLine]", 
      RowBox[{
       FractionBox["Ddf", "2"], 
       RowBox[{"(", 
        RowBox[{
         RowBox[{
          FractionBox[
           RowBox[{"Dm", "^", "2"}], 
           RowBox[{
            RowBox[{"(", 
             RowBox[{"Dm", "+", "dm"}], ")"}], "^", "2"}]], 
          RowBox[{"(", 
           FractionBox[
            RowBox[{" ", "1"}], "2"], ")"}]}], " ", "+", 
         RowBox[{
          FractionBox[
           RowBox[{"dm", "^", "2"}], 
           RowBox[{
            RowBox[{"(", 
             RowBox[{"Dm", "+", "dm"}], ")"}], "^", "2"}]], 
          RowBox[{"(", " ", 
           RowBox[{"(", 
            FractionBox[
             RowBox[{"(", 
              RowBox[{"1", "-", "\[Delta]"}], ")"}], "2"], ")"}], " ", 
           ")"}]}], "+", " ", 
         RowBox[{
          FractionBox[
           RowBox[{"2", " ", "Dm", " ", "dm"}], 
           RowBox[{
            RowBox[{"(", 
             RowBox[{"Dm", "+", "dm"}], ")"}], "^", "2"}]], " ", 
          RowBox[{"(", 
           FractionBox[
            RowBox[{
             FractionBox["1", "2"], "+", 
             RowBox[{"c", 
              RowBox[{"(", 
               FractionBox[
                RowBox[{"1", "-", "\[Delta]"}], "2"], ")"}]}]}], 
            RowBox[{"(", 
             RowBox[{"1", "+", "c"}], ")"}]], ")"}]}]}], ")"}]}]}], ")"}]}]}],
   ";"}], "\[IndentingNewLine]", 
 RowBox[{
  RowBox[{"dmjuveniles2", " ", "=", 
   RowBox[{"b", "*", 
    RowBox[{"(", 
     RowBox[{"1", "-", 
      RowBox[{"\[Alpha]", " ", "totAdults"}]}], ")"}], 
    RowBox[{"(", 
     RowBox[{
      RowBox[{
       FractionBox["Ddf", "2"], 
       RowBox[{"(", 
        RowBox[{
         RowBox[{
          FractionBox[
           RowBox[{"Dm", "^", "2"}], 
           RowBox[{
            RowBox[{"(", 
             RowBox[{"Dm", "+", "dm"}], ")"}], "^", "2"}]], 
          RowBox[{"(", 
           FractionBox[
            RowBox[{" ", "1"}], "2"], ")"}]}], " ", "+", 
         RowBox[{
          FractionBox[
           RowBox[{"dm", "^", "2"}], 
           RowBox[{
            RowBox[{"(", 
             RowBox[{"Dm", "+", "dm"}], ")"}], "^", "2"}]], 
          RowBox[{"(", 
           FractionBox[
            RowBox[{"(", 
             RowBox[{"1", "-", "\[Delta]"}], ")"}], "2"], ")"}]}], " ", "+", 
         " ", 
         RowBox[{
          FractionBox[
           RowBox[{"2", " ", "Dm", " ", "dm", " "}], 
           RowBox[{
            RowBox[{"(", 
             RowBox[{"Dm", "+", "dm"}], ")"}], "^", "2"}]], 
          RowBox[{"(", 
           FractionBox[
            RowBox[{
             FractionBox["1", "2"], "+", " ", 
             RowBox[{"c", 
              RowBox[{"(", 
               FractionBox[
                RowBox[{"1", "-", "\[Delta]"}], "2"], ")"}]}]}], 
            RowBox[{"(", 
             RowBox[{"1", "+", "c"}], ")"}]], ")"}]}]}], " ", ")"}]}], "+", 
      " ", "\[IndentingNewLine]", 
      RowBox[{"ddf", 
       RowBox[{"(", 
        RowBox[{
         RowBox[{
          FractionBox[
           RowBox[{"Dm", "^", "2"}], 
           RowBox[{
            RowBox[{"(", 
             RowBox[{"Dm", "+", "dm"}], ")"}], "^", "2"}]], 
          RowBox[{"(", 
           FractionBox["1", "2"], ")"}]}], " ", "+", 
         RowBox[{
          FractionBox[
           RowBox[{"dm", "^", "2"}], 
           RowBox[{
            RowBox[{"(", 
             RowBox[{"Dm", "+", "dm"}], ")"}], "^", "2"}]], " ", 
          RowBox[{"(", 
           FractionBox[
            RowBox[{"(", 
             RowBox[{"1", "-", "\[Delta]"}], ")"}], "2"], ")"}]}], " ", "+", 
         RowBox[{
          FractionBox[
           RowBox[{"2", " ", "Dm", " ", "dm", " "}], 
           RowBox[{
            RowBox[{"(", 
             RowBox[{"Dm", "+", "dm"}], ")"}], "^", "2"}]], 
          RowBox[{"(", 
           FractionBox[
            RowBox[{
             FractionBox["1", "2"], "+", 
             RowBox[{"c", 
              RowBox[{"(", " ", 
               FractionBox[
                RowBox[{"1", "-", "\[Delta]"}], "2"], ")"}]}]}], 
            RowBox[{"(", 
             RowBox[{"1", "+", "c"}], ")"}]], ")"}]}]}], " ", ")"}]}]}], 
     ")"}]}]}], ";"}]}], "Input",
 CellChangeTimes->{{3.781874918016214*^9, 3.781874951890514*^9}, {
   3.781875698598501*^9, 3.78187575402771*^9}, {3.781883716099955*^9, 
   3.781883758543943*^9}, 3.781961176952222*^9, {3.814006553046831*^9, 
   3.814006553430848*^9}, 3.814007837944531*^9, {3.814008284582357*^9, 
   3.814008332361627*^9}, 3.814075935343079*^9, {3.814075980488933*^9, 
   3.8140759804948893`*^9}, {3.814076984817071*^9, 3.814077013953087*^9}, {
   3.814077044964316*^9, 3.814077073009499*^9}, {3.814078523321558*^9, 
   3.814078524018896*^9}, {3.8140785664193373`*^9, 3.8140785750479307`*^9}, {
   3.814082704904151*^9, 3.8140827243784637`*^9}, {3.814082895233481*^9, 
   3.8140833100983257`*^9}, {3.814083353027583*^9, 3.814083462625531*^9}, {
   3.8140836262247887`*^9, 3.814083667303977*^9}, {3.814083708175639*^9, 
   3.814083733106092*^9}, {3.8140838005147743`*^9, 3.814083961307704*^9}, {
   3.814084240368881*^9, 3.814084314710822*^9}, {3.814084514824009*^9, 
   3.814084517145873*^9}, {3.814084581274603*^9, 3.814084593241027*^9}, {
   3.814084630355673*^9, 3.814084636508759*^9}},
 CellLabel->
  "In[1352]:=",ExpressionUUID->"49a453be-289a-46d8-a5bb-2cff568a2eac"],

Cell["\<\
Before the next generation of adults, viability selection acts according to \
genotype. \
\>", "Text",
 CellChangeTimes->{
  3.814084633192759*^9},ExpressionUUID->"84e39e22-f4cc-4793-a45a-\
e8a087e71a1e"],

Cell[BoxData[{
 RowBox[{
  RowBox[{"DDfprime2", "=", 
   RowBox[{"DDfjuveniles2", "*", " ", "1"}]}], ";"}], "\[IndentingNewLine]", 
 RowBox[{
  RowBox[{"Ddfprime2", "=", 
   RowBox[{"Ddfjuveniles2", "*", 
    RowBox[{"(", 
     RowBox[{"1", " ", "-", " ", 
      RowBox[{"h", "*", "sf"}]}], ")"}]}]}], ";"}], "\[IndentingNewLine]", 
 RowBox[{
  RowBox[{"ddfprime2", "=", 
   RowBox[{"ddfjuveniles2", "*", 
    RowBox[{"(", 
     RowBox[{"1", " ", "-", " ", "sf"}], ")"}]}]}], 
  ";"}], "\[IndentingNewLine]", 
 RowBox[{
  RowBox[{"Dmprime2", "=", 
   RowBox[{"Dmjuveniles2", "*", "1"}]}], ";"}], "\[IndentingNewLine]", 
 RowBox[{
  RowBox[{"dmprime2", "=", 
   RowBox[{"dmjuveniles2", "*", 
    RowBox[{"(", 
     RowBox[{"1", " ", "-", " ", "sm"}], ")"}]}]}], ";"}]}], "Input",
 CellLabel->
  "In[1357]:=",ExpressionUUID->"c9182c0f-7901-46d8-8bbb-a2f0e2c978ec"]
}, Closed]],

Cell[CellGroupData[{

Cell["Equilibrium allele frequency and population size", "Subsection",
 CellChangeTimes->{{3.7818749850842857`*^9, 
  3.781874995173348*^9}},ExpressionUUID->"8c3a6cc1-cc9d-4c72-b273-\
ef5ed5c3ee86"],

Cell["\<\
The eco-evolutionary dynamics are at equilibrium when the difference \
equations (solvemeFull) are equal to 0 (no change). We use subeq to convert \
the difference equations so that they track the genotype frequency in males \
(pm), females (pf), inbreeding coefficient (F), and the number of males \
(maleNum) and females (femaleNum). \
\>", "Text",
 CellChangeTimes->{{3.814007613282021*^9, 3.814007656119938*^9}, {
  3.814007994963559*^9, 3.8140080779300632`*^9}, {3.814008624908166*^9, 
  3.814008629557644*^9}},ExpressionUUID->"3fa6a303-336e-49b9-ba10-\
d0f9b7c8282d"],

Cell[BoxData[
 RowBox[{
  RowBox[{"solvemeFull", "=", 
   RowBox[{
    RowBox[{
     RowBox[{"{", 
      RowBox[{
       RowBox[{"DDfprime2", "-", "DDf"}], ",", 
       RowBox[{"Ddfprime2", "-", "Ddf"}], ",", 
       RowBox[{"ddfprime2", "-", "ddf"}], ",", " ", 
       RowBox[{"Dmprime2", "-", "Dm"}], ",", " ", 
       RowBox[{"dmprime2", "-", "dm"}]}], "}"}], "/.", 
     RowBox[{"subeq", "[", 
      RowBox[{"[", "1", "]"}], "]"}]}], "//", "Simplify"}]}], ";"}]], "Input",
 CellChangeTimes->{
  3.814007660711735*^9, {3.814007962027532*^9, 3.814007980946431*^9}, {
   3.814008499992148*^9, 3.8140085169206333`*^9}},
 CellLabel->
  "In[1362]:=",ExpressionUUID->"797883cf-eaed-4f58-8766-21be4be1bc4a"],

Cell["\<\
When drive is absent (pm=0, pf=0) or fixed (pm=1, pf=1), the allele \
frequencies cannot change. We can get the equilibrium population size \
(maleNum and femaleNum) for these evolutionary equilibria. \
\>", "Text",
 CellChangeTimes->{{3.814008155520987*^9, 3.8140082177096167`*^9}, {
  3.814008646664893*^9, 
  3.8140086479141006`*^9}},ExpressionUUID->"1f0fa615-a1a8-4a49-8f28-\
362abf728df4"],

Cell[CellGroupData[{

Cell[BoxData[{
 RowBox[{"noDrivePopSizeSol2", "=", 
  RowBox[{"Solve", "[", 
   RowBox[{
    RowBox[{
     RowBox[{"(", 
      RowBox[{
       RowBox[{"solvemeFull", "/.", 
        RowBox[{"pm", "\[Rule]", "0"}]}], "/.", 
       RowBox[{"pf", "\[Rule]", "0"}]}], ")"}], "\[Equal]", 
     RowBox[{"{", 
      RowBox[{"0", ",", "0", ",", "0", ",", "0", ",", "0"}], "}"}]}], ",", 
    RowBox[{"{", 
     RowBox[{"maleNum", ",", "femaleNum"}], "}"}]}], 
   "]"}]}], "\[IndentingNewLine]", 
 RowBox[{"fixedDrivePopSizeSol2", " ", "=", " ", 
  RowBox[{"Solve", "[", 
   RowBox[{
    RowBox[{
     RowBox[{"(", 
      RowBox[{
       RowBox[{"solvemeFull", "/.", 
        RowBox[{"pm", "\[Rule]", "1"}]}], "/.", 
       RowBox[{"pf", "\[Rule]", "1"}]}], ")"}], "\[Equal]", 
     RowBox[{"{", 
      RowBox[{"0", ",", "0", ",", "0", ",", "0", ",", "0"}], "}"}]}], ",", 
    RowBox[{"{", 
     RowBox[{"maleNum", ",", "femaleNum"}], "}"}]}], "]"}]}]}], "Input",
 CellChangeTimes->{{3.781883653232218*^9, 3.781883685637601*^9}, {
   3.781950010576271*^9, 3.7819502188531847`*^9}, {3.78195028325841*^9, 
   3.781950300097888*^9}, {3.78195045726005*^9, 3.781950472913829*^9}, {
   3.781961389029669*^9, 3.7819614047128553`*^9}, 3.781961746977097*^9, {
   3.800012174367577*^9, 3.800012179664307*^9}, {3.814005814117457*^9, 
   3.8140058327809057`*^9}, {3.814006629646102*^9, 3.8140066347172003`*^9}, {
   3.814007663064589*^9, 3.814007663894669*^9}, {3.81400855941399*^9, 
   3.814008559838789*^9}},
 CellLabel->
  "In[1363]:=",ExpressionUUID->"2fd847cc-8c70-4b60-852d-932e9004fbd7"],

Cell[BoxData[
 RowBox[{"{", 
  RowBox[{
   RowBox[{"{", 
    RowBox[{
     RowBox[{"maleNum", "\[Rule]", "0"}], ",", 
     RowBox[{"femaleNum", "\[Rule]", "0"}]}], "}"}], ",", 
   RowBox[{"{", 
    RowBox[{
     RowBox[{"maleNum", "\[Rule]", 
      FractionBox[
       RowBox[{
        RowBox[{"-", "2"}], "+", "b"}], 
       RowBox[{"2", " ", "b", " ", "\[Alpha]"}]]}], ",", 
     RowBox[{"femaleNum", "\[Rule]", 
      FractionBox[
       RowBox[{
        RowBox[{"-", "2"}], "+", "b"}], 
       RowBox[{"2", " ", "b", " ", "\[Alpha]"}]]}]}], "}"}]}], 
  "}"}]], "Output",
 CellChangeTimes->{
  3.800268331335506*^9, 3.81400652721336*^9, {3.814006618732967*^9, 
   3.814006635123662*^9}, 3.814007114055028*^9, 3.814007664388343*^9, 
   3.81400798381371*^9, 3.81400821956627*^9, {3.814008512705503*^9, 
   3.814008519393764*^9}, 3.8140091267207317`*^9, {3.814009414364393*^9, 
   3.8140094177191896`*^9}, 3.814084653233059*^9, 3.814196515663265*^9},
 CellLabel->
  "Out[1363]=",ExpressionUUID->"112ee71e-507d-4a44-92c1-285475b460fc"],

Cell[BoxData[
 RowBox[{"{", 
  RowBox[{
   RowBox[{"{", 
    RowBox[{
     RowBox[{"maleNum", "\[Rule]", "0"}], ",", 
     RowBox[{"femaleNum", "\[Rule]", "0"}]}], "}"}], ",", 
   RowBox[{"{", 
    RowBox[{
     RowBox[{"maleNum", "\[Rule]", 
      FractionBox[
       RowBox[{
        RowBox[{"(", 
         RowBox[{
          RowBox[{"-", "1"}], "+", "sm"}], ")"}], " ", 
        RowBox[{"(", 
         RowBox[{
          RowBox[{"-", "1"}], "+", "\[Delta]"}], ")"}], " ", 
        RowBox[{"(", 
         RowBox[{"2", "-", "b", "+", 
          RowBox[{"b", " ", "sf"}], "-", 
          RowBox[{"b", " ", "\[Delta]"}], "+", 
          RowBox[{"b", " ", "sf", " ", "\[Delta]"}]}], ")"}]}], 
       RowBox[{"b", " ", 
        RowBox[{"(", 
         RowBox[{
          RowBox[{"-", "1"}], "+", "sf"}], ")"}], " ", "\[Alpha]", " ", 
        RowBox[{"(", 
         RowBox[{"1", "+", "\[Delta]"}], ")"}], " ", 
        RowBox[{"(", 
         RowBox[{"2", "-", "sf", "-", "sm", "-", 
          RowBox[{"sf", " ", "\[Delta]"}], "+", 
          RowBox[{"sm", " ", "\[Delta]"}]}], ")"}]}]]}], ",", 
     RowBox[{"femaleNum", "\[Rule]", 
      FractionBox[
       RowBox[{"2", "-", "b", "+", 
        RowBox[{"b", " ", "sf"}], "-", 
        RowBox[{"b", " ", "\[Delta]"}], "+", 
        RowBox[{"b", " ", "sf", " ", "\[Delta]"}]}], 
       RowBox[{"b", " ", "\[Alpha]", " ", 
        RowBox[{"(", 
         RowBox[{
          RowBox[{"-", "2"}], "+", "sf", "+", "sm", "+", 
          RowBox[{"sf", " ", "\[Delta]"}], "-", 
          RowBox[{"sm", " ", "\[Delta]"}]}], ")"}]}]]}]}], "}"}]}], 
  "}"}]], "Output",
 CellChangeTimes->{
  3.800268331335506*^9, 3.81400652721336*^9, {3.814006618732967*^9, 
   3.814006635123662*^9}, 3.814007114055028*^9, 3.814007664388343*^9, 
   3.81400798381371*^9, 3.81400821956627*^9, {3.814008512705503*^9, 
   3.814008519393764*^9}, 3.8140091267207317`*^9, {3.814009414364393*^9, 
   3.8140094177191896`*^9}, 3.814084653233059*^9, 3.814196515710176*^9},
 CellLabel->
  "Out[1364]=",ExpressionUUID->"1ff45ad7-bfc0-40a6-8796-741664783276"]
}, Open  ]],

Cell["\<\
We also expect drive can reach an intermediate equilibrium allele frequency. \
We make it easier to solve for this equilibrium allele frequency by focussing \
on the difference in allele frequency and allele frequency between \
generations. \
\>", "Text",
 CellChangeTimes->{{3.8140091610875177`*^9, 
  3.8140092442461643`*^9}},ExpressionUUID->"3ee33cf4-9caa-438a-91a8-\
e6c61ff9bfce"],

Cell[BoxData[
 RowBox[{
  RowBox[{"solveme", "=", 
   RowBox[{"Simplify", "[", 
    RowBox[{
     RowBox[{
      RowBox[{"{", 
       RowBox[{
        RowBox[{
         RowBox[{"(", 
          FractionBox["dmprime2", 
           RowBox[{"Dmprime2", "+", "dmprime2"}]], ")"}], "-", "pm"}], ",", 
        RowBox[{
         RowBox[{"(", 
          FractionBox[
           RowBox[{
            RowBox[{"2", " ", "ddfprime2"}], "+", "Ddfprime2"}], 
           RowBox[{"2", " ", 
            RowBox[{"(", 
             RowBox[{"ddfprime2", "+", "Ddfprime2", "+", "DDfprime2"}], 
             ")"}]}]], ")"}], "-", "pf"}], ",", 
        RowBox[{
         RowBox[{"(", 
          FractionBox[
           RowBox[{
            RowBox[{"4", " ", "ddfprime2", " ", "DDfprime2"}], " ", "-", 
            SuperscriptBox["Ddfprime2", "2"]}], 
           RowBox[{
            RowBox[{"(", 
             RowBox[{
              RowBox[{"2", " ", "ddfprime2"}], "+", "Ddfprime2"}], ")"}], " ", 
            RowBox[{"(", 
             RowBox[{"Ddfprime2", "+", 
              RowBox[{"2", " ", "DDfprime2"}]}], ")"}]}]], ")"}], "-", 
         "F"}]}], "}"}], "/.", 
      RowBox[{"{", 
       RowBox[{
        RowBox[{"pm", "\[Rule]", 
         FractionBox["dm", 
          RowBox[{"dm", "+", "Dm"}]]}], ",", 
        RowBox[{"pf", "\[Rule]", 
         FractionBox[
          RowBox[{
           RowBox[{"2", " ", "ddf"}], "+", "Ddf"}], 
          RowBox[{"2", " ", 
           RowBox[{"(", 
            RowBox[{"ddf", "+", "Ddf", "+", "DDf"}], ")"}]}]]}], ",", 
        RowBox[{"F", "\[Rule]", 
         FractionBox[
          RowBox[{
           RowBox[{"-", 
            SuperscriptBox["Ddf", "2"]}], "+", 
           RowBox[{"4", " ", "ddf", " ", "DDf"}]}], 
          RowBox[{
           RowBox[{"(", 
            RowBox[{
             RowBox[{"2", " ", "ddf"}], "+", "Ddf"}], ")"}], " ", 
           RowBox[{"(", 
            RowBox[{"Ddf", "+", 
             RowBox[{"2", " ", "DDf"}]}], ")"}]}]]}]}], "}"}]}], "/.", 
     "subeq"}], "]"}]}], ";"}]], "Input",
 CellChangeTimes->{{3.781875008764103*^9, 3.7818750765542803`*^9}, 
   3.781875124347249*^9, {3.781875300683763*^9, 3.781875369095936*^9}, 
   3.781875932900531*^9, {3.781877093213214*^9, 3.78187709654655*^9}, {
   3.781877573705399*^9, 3.781877573959036*^9}, {3.7818843060919533`*^9, 
   3.781884321527413*^9}, {3.8140070581388903`*^9, 3.814007079486866*^9}, {
   3.8140082567724743`*^9, 3.8140082720497427`*^9}, {3.814008531389463*^9, 
   3.8140085319173737`*^9}, {3.814009248476453*^9, 3.814009248825746*^9}},
 CellLabel->
  "In[1365]:=",ExpressionUUID->"1c43e52d-6fae-4d7c-8290-b58af3761bb2"],

Cell["\<\
However, we are only able to get a result for the polymorphic equilibrium \
when we further assume that there is no selection in adult males (sm=0). \
\>", "Text",
 CellChangeTimes->{{3.8140092507145643`*^9, 
  3.814009313049942*^9}},ExpressionUUID->"ac86ebce-ccb5-4e46-895b-\
f4f370499b0b"],

Cell[CellGroupData[{

Cell[BoxData[
 RowBox[{"equilibrium", "=", 
  RowBox[{
   RowBox[{"Solve", "[", 
    RowBox[{
     RowBox[{
      RowBox[{"(", 
       RowBox[{
        RowBox[{"solveme", "[", 
         RowBox[{"[", "1", "]"}], "]"}], "/.", 
        RowBox[{"sm", "\[Rule]", "0"}]}], ")"}], "\[Equal]", 
      RowBox[{"{", 
       RowBox[{"0", ",", "0", ",", "0"}], "}"}]}], ",", 
     RowBox[{"{", 
      RowBox[{"pm", ",", "pf", ",", "F"}], "}"}]}], "]"}], "//", 
   "Simplify"}]}]], "Input",
 CellChangeTimes->{{3.781875133272497*^9, 3.781875133336864*^9}, {
   3.7818756691961737`*^9, 3.781875671668582*^9}, 3.7818758813381*^9, {
   3.8140075485293694`*^9, 3.814007554648246*^9}},
 CellLabel->
  "In[1366]:=",ExpressionUUID->"24e38814-b48b-4912-8a57-eba6bbb961af"],

Cell[BoxData[
 RowBox[{"{", 
  RowBox[{
   RowBox[{"{", 
    RowBox[{
     RowBox[{"pm", "\[Rule]", 
      RowBox[{"-", 
       RowBox[{
        FractionBox["1", 
         RowBox[{"4", " ", 
          RowBox[{"(", 
           RowBox[{
            RowBox[{"-", "1"}], "+", "c"}], ")"}], " ", "sf", " ", 
          RowBox[{"(", 
           RowBox[{
            RowBox[{"-", "1"}], "-", "\[Delta]", "+", 
            RowBox[{"h", " ", 
             RowBox[{"(", 
              RowBox[{"2", "+", "\[Delta]"}], ")"}]}]}], ")"}]}]], 
        RowBox[{"(", 
         RowBox[{
          RowBox[{"4", " ", "c", " ", "sf"}], "-", 
          RowBox[{"8", " ", "c", " ", "h", " ", "sf"}], "-", "\[Delta]", "+", 
          RowBox[{"c", " ", "\[Delta]"}], "+", 
          RowBox[{"4", " ", "c", " ", "sf", " ", "\[Delta]"}], "+", 
          RowBox[{"h", " ", "sf", " ", "\[Delta]"}], "-", 
          RowBox[{"5", " ", "c", " ", "h", " ", "sf", " ", "\[Delta]"}], "+", 
          SqrtBox[
           RowBox[{
            RowBox[{
             RowBox[{"-", "8"}], " ", 
             RowBox[{"(", 
              RowBox[{
               RowBox[{"-", "1"}], "+", "c"}], ")"}], " ", "sf", " ", 
             RowBox[{"(", 
              RowBox[{
               RowBox[{"-", "1"}], "-", "\[Delta]", "+", 
               RowBox[{"h", " ", 
                RowBox[{"(", 
                 RowBox[{"2", "+", "\[Delta]"}], ")"}]}]}], ")"}], " ", 
             RowBox[{"(", 
              RowBox[{"1", "+", 
               RowBox[{"h", " ", "sf"}], "+", 
               RowBox[{"c", " ", 
                RowBox[{"(", 
                 RowBox[{
                  RowBox[{"-", "1"}], "-", 
                  RowBox[{"2", " ", "\[Delta]"}], "+", 
                  RowBox[{"h", " ", "sf", " ", 
                   RowBox[{"(", 
                    RowBox[{"3", "+", 
                    RowBox[{"2", " ", "\[Delta]"}]}], ")"}]}]}], ")"}]}]}], 
              ")"}]}], "+", 
            SuperscriptBox[
             RowBox[{"(", 
              RowBox[{
               RowBox[{
                RowBox[{"(", 
                 RowBox[{
                  RowBox[{"-", "1"}], "+", 
                  RowBox[{"h", " ", "sf"}]}], ")"}], " ", "\[Delta]"}], "+", 
               RowBox[{"c", " ", 
                RowBox[{"(", 
                 RowBox[{"\[Delta]", "+", 
                  RowBox[{"sf", " ", 
                   RowBox[{"(", 
                    RowBox[{"4", "-", 
                    RowBox[{"8", " ", "h"}], "+", 
                    RowBox[{"4", " ", "\[Delta]"}], "-", 
                    RowBox[{"5", " ", "h", " ", "\[Delta]"}]}], ")"}]}]}], 
                 ")"}]}]}], ")"}], "2"]}]]}], ")"}]}]}]}], ",", 
     RowBox[{"pf", "\[Rule]", 
      RowBox[{"-", 
       RowBox[{
        FractionBox["1", 
         RowBox[{"4", " ", 
          RowBox[{"(", 
           RowBox[{
            RowBox[{"-", "1"}], "+", "c"}], ")"}], " ", "sf", " ", 
          RowBox[{"(", 
           RowBox[{
            RowBox[{"-", "1"}], "-", "\[Delta]", "+", 
            RowBox[{"h", " ", 
             RowBox[{"(", 
              RowBox[{"2", "+", "\[Delta]"}], ")"}]}]}], ")"}]}]], 
        RowBox[{"(", 
         RowBox[{
          RowBox[{"4", " ", "c", " ", "sf"}], "-", 
          RowBox[{"8", " ", "c", " ", "h", " ", "sf"}], "-", "\[Delta]", "+", 
          RowBox[{"c", " ", "\[Delta]"}], "+", 
          RowBox[{"4", " ", "c", " ", "sf", " ", "\[Delta]"}], "+", 
          RowBox[{"h", " ", "sf", " ", "\[Delta]"}], "-", 
          RowBox[{"5", " ", "c", " ", "h", " ", "sf", " ", "\[Delta]"}], "+", 
          SqrtBox[
           RowBox[{
            RowBox[{
             RowBox[{"-", "8"}], " ", 
             RowBox[{"(", 
              RowBox[{
               RowBox[{"-", "1"}], "+", "c"}], ")"}], " ", "sf", " ", 
             RowBox[{"(", 
              RowBox[{
               RowBox[{"-", "1"}], "-", "\[Delta]", "+", 
               RowBox[{"h", " ", 
                RowBox[{"(", 
                 RowBox[{"2", "+", "\[Delta]"}], ")"}]}]}], ")"}], " ", 
             RowBox[{"(", 
              RowBox[{"1", "+", 
               RowBox[{"h", " ", "sf"}], "+", 
               RowBox[{"c", " ", 
                RowBox[{"(", 
                 RowBox[{
                  RowBox[{"-", "1"}], "-", 
                  RowBox[{"2", " ", "\[Delta]"}], "+", 
                  RowBox[{"h", " ", "sf", " ", 
                   RowBox[{"(", 
                    RowBox[{"3", "+", 
                    RowBox[{"2", " ", "\[Delta]"}]}], ")"}]}]}], ")"}]}]}], 
              ")"}]}], "+", 
            SuperscriptBox[
             RowBox[{"(", 
              RowBox[{
               RowBox[{
                RowBox[{"(", 
                 RowBox[{
                  RowBox[{"-", "1"}], "+", 
                  RowBox[{"h", " ", "sf"}]}], ")"}], " ", "\[Delta]"}], "+", 
               RowBox[{"c", " ", 
                RowBox[{"(", 
                 RowBox[{"\[Delta]", "+", 
                  RowBox[{"sf", " ", 
                   RowBox[{"(", 
                    RowBox[{"4", "-", 
                    RowBox[{"8", " ", "h"}], "+", 
                    RowBox[{"4", " ", "\[Delta]"}], "-", 
                    RowBox[{"5", " ", "h", " ", "\[Delta]"}]}], ")"}]}]}], 
                 ")"}]}]}], ")"}], "2"]}]]}], ")"}]}]}]}], ",", 
     RowBox[{"F", "\[Rule]", 
      RowBox[{
       RowBox[{"(", 
        RowBox[{
         RowBox[{
          RowBox[{"-", "2"}], " ", "sf"}], "+", 
         RowBox[{"4", " ", "c", " ", "sf"}], "-", 
         RowBox[{"2", " ", 
          SuperscriptBox["c", "2"], " ", "sf"}], "+", 
         RowBox[{"4", " ", "h", " ", "sf"}], "-", 
         RowBox[{"8", " ", "c", " ", "h", " ", "sf"}], "+", 
         RowBox[{"4", " ", 
          SuperscriptBox["c", "2"], " ", "h", " ", "sf"}], "+", 
         RowBox[{"8", " ", 
          SuperscriptBox["sf", "2"]}], "+", 
         RowBox[{"4", " ", "c", " ", 
          SuperscriptBox["sf", "2"]}], "+", 
         RowBox[{"4", " ", 
          SuperscriptBox["c", "2"], " ", 
          SuperscriptBox["sf", "2"]}], "-", 
         RowBox[{"18", " ", "h", " ", 
          SuperscriptBox["sf", "2"]}], "-", 
         RowBox[{"36", " ", "c", " ", "h", " ", 
          SuperscriptBox["sf", "2"]}], "-", 
         RowBox[{"10", " ", 
          SuperscriptBox["c", "2"], " ", "h", " ", 
          SuperscriptBox["sf", "2"]}], "+", 
         RowBox[{"8", " ", 
          SuperscriptBox["h", "2"], " ", 
          SuperscriptBox["sf", "2"]}], "+", 
         RowBox[{"48", " ", "c", " ", 
          SuperscriptBox["h", "2"], " ", 
          SuperscriptBox["sf", "2"]}], "+", 
         RowBox[{"8", " ", 
          SuperscriptBox["c", "2"], " ", 
          SuperscriptBox["h", "2"], " ", 
          SuperscriptBox["sf", "2"]}], "+", 
         RowBox[{"8", " ", "h", " ", 
          SuperscriptBox["sf", "3"]}], "+", 
         RowBox[{"24", " ", "c", " ", "h", " ", 
          SuperscriptBox["sf", "3"]}], "-", 
         RowBox[{"14", " ", 
          SuperscriptBox["h", "2"], " ", 
          SuperscriptBox["sf", "3"]}], "-", 
         RowBox[{"36", " ", "c", " ", 
          SuperscriptBox["h", "2"], " ", 
          SuperscriptBox["sf", "3"]}], "-", 
         RowBox[{"14", " ", 
          SuperscriptBox["c", "2"], " ", 
          SuperscriptBox["h", "2"], " ", 
          SuperscriptBox["sf", "3"]}], "+", 
         RowBox[{"4", " ", 
          SuperscriptBox["h", "3"], " ", 
          SuperscriptBox["sf", "3"]}], "-", 
         RowBox[{"8", " ", "c", " ", 
          SuperscriptBox["h", "3"], " ", 
          SuperscriptBox["sf", "3"]}], "+", 
         RowBox[{"4", " ", 
          SuperscriptBox["c", "2"], " ", 
          SuperscriptBox["h", "3"], " ", 
          SuperscriptBox["sf", "3"]}], "+", 
         RowBox[{"4", " ", "c", " ", 
          SuperscriptBox["h", "2"], " ", 
          SuperscriptBox["sf", "4"]}], "+", 
         RowBox[{"12", " ", 
          SuperscriptBox["c", "2"], " ", 
          SuperscriptBox["h", "2"], " ", 
          SuperscriptBox["sf", "4"]}], "+", 
         RowBox[{"2", " ", 
          SuperscriptBox["h", "3"], " ", 
          SuperscriptBox["sf", "4"]}], "+", 
         RowBox[{"4", " ", "c", " ", 
          SuperscriptBox["h", "3"], " ", 
          SuperscriptBox["sf", "4"]}], "-", 
         RowBox[{"6", " ", 
          SuperscriptBox["c", "2"], " ", 
          SuperscriptBox["h", "3"], " ", 
          SuperscriptBox["sf", "4"]}], "-", 
         RowBox[{"9", " ", "sf", " ", "\[Delta]"}], "+", 
         RowBox[{"10", " ", "c", " ", "sf", " ", "\[Delta]"}], "-", 
         RowBox[{
          SuperscriptBox["c", "2"], " ", "sf", " ", "\[Delta]"}], "+", 
         RowBox[{"12", " ", "h", " ", "sf", " ", "\[Delta]"}], "-", 
         RowBox[{"8", " ", "c", " ", "h", " ", "sf", " ", "\[Delta]"}], "-", 
         RowBox[{"4", " ", 
          SuperscriptBox["c", "2"], " ", "h", " ", "sf", " ", "\[Delta]"}], 
         "+", 
         RowBox[{"8", " ", 
          SuperscriptBox["sf", "2"], " ", "\[Delta]"}], "-", 
         RowBox[{"4", " ", "c", " ", 
          SuperscriptBox["sf", "2"], " ", "\[Delta]"}], "+", 
         RowBox[{"4", " ", 
          SuperscriptBox["c", "2"], " ", 
          SuperscriptBox["sf", "2"], " ", "\[Delta]"}], "-", 
         RowBox[{"13", " ", "h", " ", 
          SuperscriptBox["sf", "2"], " ", "\[Delta]"}], "-", 
         RowBox[{"38", " ", "c", " ", "h", " ", 
          SuperscriptBox["sf", "2"], " ", "\[Delta]"}], "+", 
         RowBox[{"3", " ", 
          SuperscriptBox["c", "2"], " ", "h", " ", 
          SuperscriptBox["sf", "2"], " ", "\[Delta]"}], "+", 
         RowBox[{"48", " ", "c", " ", 
          SuperscriptBox["h", "2"], " ", 
          SuperscriptBox["sf", "2"], " ", "\[Delta]"}], "+", 
         RowBox[{"16", " ", 
          SuperscriptBox["c", "2"], " ", 
          SuperscriptBox["h", "2"], " ", 
          SuperscriptBox["sf", "2"], " ", "\[Delta]"}], "+", 
         RowBox[{"8", " ", "h", " ", 
          SuperscriptBox["sf", "3"], " ", "\[Delta]"}], "+", 
         RowBox[{"32", " ", "c", " ", "h", " ", 
          SuperscriptBox["sf", "3"], " ", "\[Delta]"}], "-", 
         RowBox[{"8", " ", 
          SuperscriptBox["c", "2"], " ", "h", " ", 
          SuperscriptBox["sf", "3"], " ", "\[Delta]"}], "-", 
         RowBox[{"11", " ", 
          SuperscriptBox["h", "2"], " ", 
          SuperscriptBox["sf", "3"], " ", "\[Delta]"}], "-", 
         RowBox[{"42", " ", "c", " ", 
          SuperscriptBox["h", "2"], " ", 
          SuperscriptBox["sf", "3"], " ", "\[Delta]"}], "-", 
         RowBox[{"27", " ", 
          SuperscriptBox["c", "2"], " ", 
          SuperscriptBox["h", "2"], " ", 
          SuperscriptBox["sf", "3"], " ", "\[Delta]"}], "+", 
         RowBox[{"4", " ", 
          SuperscriptBox["h", "3"], " ", 
          SuperscriptBox["sf", "3"], " ", "\[Delta]"}], "-", 
         RowBox[{"8", " ", "c", " ", 
          SuperscriptBox["h", "3"], " ", 
          SuperscriptBox["sf", "3"], " ", "\[Delta]"}], "+", 
         RowBox[{"4", " ", 
          SuperscriptBox["c", "2"], " ", 
          SuperscriptBox["h", "3"], " ", 
          SuperscriptBox["sf", "3"], " ", "\[Delta]"}], "+", 
         RowBox[{"4", " ", "c", " ", 
          SuperscriptBox["h", "2"], " ", 
          SuperscriptBox["sf", "4"], " ", "\[Delta]"}], "+", 
         RowBox[{"20", " ", 
          SuperscriptBox["c", "2"], " ", 
          SuperscriptBox["h", "2"], " ", 
          SuperscriptBox["sf", "4"], " ", "\[Delta]"}], "+", 
         RowBox[{
          SuperscriptBox["h", "3"], " ", 
          SuperscriptBox["sf", "4"], " ", "\[Delta]"}], "+", 
         RowBox[{"6", " ", "c", " ", 
          SuperscriptBox["h", "3"], " ", 
          SuperscriptBox["sf", "4"], " ", "\[Delta]"}], "-", 
         RowBox[{"7", " ", 
          SuperscriptBox["c", "2"], " ", 
          SuperscriptBox["h", "3"], " ", 
          SuperscriptBox["sf", "4"], " ", "\[Delta]"}], "+", 
         SuperscriptBox["\[Delta]", "2"], "-", 
         RowBox[{"2", " ", "c", " ", 
          SuperscriptBox["\[Delta]", "2"]}], "+", 
         RowBox[{
          SuperscriptBox["c", "2"], " ", 
          SuperscriptBox["\[Delta]", "2"]}], "-", 
         RowBox[{"2", " ", "sf", " ", 
          SuperscriptBox["\[Delta]", "2"]}], "+", 
         RowBox[{"10", " ", "c", " ", "sf", " ", 
          SuperscriptBox["\[Delta]", "2"]}], "-", 
         RowBox[{"h", " ", "sf", " ", 
          SuperscriptBox["\[Delta]", "2"]}], "-", 
         RowBox[{"6", " ", "c", " ", "h", " ", "sf", " ", 
          SuperscriptBox["\[Delta]", "2"]}], "-", 
         RowBox[{"9", " ", 
          SuperscriptBox["c", "2"], " ", "h", " ", "sf", " ", 
          SuperscriptBox["\[Delta]", "2"]}], "-", 
         RowBox[{"8", " ", "c", " ", 
          SuperscriptBox["sf", "2"], " ", 
          SuperscriptBox["\[Delta]", "2"]}], "+", 
         RowBox[{"4", " ", "h", " ", 
          SuperscriptBox["sf", "2"], " ", 
          SuperscriptBox["\[Delta]", "2"]}], "-", 
         RowBox[{"2", " ", "c", " ", "h", " ", 
          SuperscriptBox["sf", "2"], " ", 
          SuperscriptBox["\[Delta]", "2"]}], "+", 
         RowBox[{"14", " ", 
          SuperscriptBox["c", "2"], " ", "h", " ", 
          SuperscriptBox["sf", "2"], " ", 
          SuperscriptBox["\[Delta]", "2"]}], "-", 
         RowBox[{
          SuperscriptBox["h", "2"], " ", 
          SuperscriptBox["sf", "2"], " ", 
          SuperscriptBox["\[Delta]", "2"]}], "+", 
         RowBox[{"10", " ", "c", " ", 
          SuperscriptBox["h", "2"], " ", 
          SuperscriptBox["sf", "2"], " ", 
          SuperscriptBox["\[Delta]", "2"]}], "+", 
         RowBox[{"7", " ", 
          SuperscriptBox["c", "2"], " ", 
          SuperscriptBox["h", "2"], " ", 
          SuperscriptBox["sf", "2"], " ", 
          SuperscriptBox["\[Delta]", "2"]}], "+", 
         RowBox[{"8", " ", "c", " ", "h", " ", 
          SuperscriptBox["sf", "3"], " ", 
          SuperscriptBox["\[Delta]", "2"]}], "-", 
         RowBox[{"8", " ", 
          SuperscriptBox["c", "2"], " ", "h", " ", 
          SuperscriptBox["sf", "3"], " ", 
          SuperscriptBox["\[Delta]", "2"]}], "-", 
         RowBox[{"2", " ", 
          SuperscriptBox["h", "2"], " ", 
          SuperscriptBox["sf", "3"], " ", 
          SuperscriptBox["\[Delta]", "2"]}], "-", 
         RowBox[{"10", " ", "c", " ", 
          SuperscriptBox["h", "2"], " ", 
          SuperscriptBox["sf", "3"], " ", 
          SuperscriptBox["\[Delta]", "2"]}], "-", 
         RowBox[{"12", " ", 
          SuperscriptBox["c", "2"], " ", 
          SuperscriptBox["h", "2"], " ", 
          SuperscriptBox["sf", "3"], " ", 
          SuperscriptBox["\[Delta]", "2"]}], "+", 
         RowBox[{
          SuperscriptBox["h", "3"], " ", 
          SuperscriptBox["sf", "3"], " ", 
          SuperscriptBox["\[Delta]", "2"]}], "-", 
         RowBox[{"2", " ", "c", " ", 
          SuperscriptBox["h", "3"], " ", 
          SuperscriptBox["sf", "3"], " ", 
          SuperscriptBox["\[Delta]", "2"]}], "+", 
         RowBox[{
          SuperscriptBox["c", "2"], " ", 
          SuperscriptBox["h", "3"], " ", 
          SuperscriptBox["sf", "3"], " ", 
          SuperscriptBox["\[Delta]", "2"]}], "+", 
         RowBox[{"8", " ", 
          SuperscriptBox["c", "2"], " ", 
          SuperscriptBox["h", "2"], " ", 
          SuperscriptBox["sf", "4"], " ", 
          SuperscriptBox["\[Delta]", "2"]}], "+", 
         RowBox[{"2", " ", "c", " ", 
          SuperscriptBox["h", "3"], " ", 
          SuperscriptBox["sf", "4"], " ", 
          SuperscriptBox["\[Delta]", "2"]}], "-", 
         RowBox[{"2", " ", 
          SuperscriptBox["c", "2"], " ", 
          SuperscriptBox["h", "3"], " ", 
          SuperscriptBox["sf", "4"], " ", 
          SuperscriptBox["\[Delta]", "2"]}], "+", 
         RowBox[{"3", " ", "sf", " ", 
          SqrtBox[
           RowBox[{
            RowBox[{
             RowBox[{"-", "8"}], " ", 
             RowBox[{"(", 
              RowBox[{
               RowBox[{"-", "1"}], "+", "c"}], ")"}], " ", "sf", " ", 
             RowBox[{"(", 
              RowBox[{
               RowBox[{"-", "1"}], "-", "\[Delta]", "+", 
               RowBox[{"h", " ", 
                RowBox[{"(", 
                 RowBox[{"2", "+", "\[Delta]"}], ")"}]}]}], ")"}], " ", 
             RowBox[{"(", 
              RowBox[{"1", "+", 
               RowBox[{"h", " ", "sf"}], "+", 
               RowBox[{"c", " ", 
                RowBox[{"(", 
                 RowBox[{
                  RowBox[{"-", "1"}], "-", 
                  RowBox[{"2", " ", "\[Delta]"}], "+", 
                  RowBox[{"h", " ", "sf", " ", 
                   RowBox[{"(", 
                    RowBox[{"3", "+", 
                    RowBox[{"2", " ", "\[Delta]"}]}], ")"}]}]}], ")"}]}]}], 
              ")"}]}], "+", 
            SuperscriptBox[
             RowBox[{"(", 
              RowBox[{
               RowBox[{
                RowBox[{"(", 
                 RowBox[{
                  RowBox[{"-", "1"}], "+", 
                  RowBox[{"h", " ", "sf"}]}], ")"}], " ", "\[Delta]"}], "+", 
               RowBox[{"c", " ", 
                RowBox[{"(", 
                 RowBox[{"\[Delta]", "+", 
                  RowBox[{"sf", " ", 
                   RowBox[{"(", 
                    RowBox[{"4", "-", 
                    RowBox[{"8", " ", "h"}], "+", 
                    RowBox[{"4", " ", "\[Delta]"}], "-", 
                    RowBox[{"5", " ", "h", " ", "\[Delta]"}]}], ")"}]}]}], 
                 ")"}]}]}], ")"}], "2"]}]]}], "+", 
         RowBox[{"c", " ", "sf", " ", 
          SqrtBox[
           RowBox[{
            RowBox[{
             RowBox[{"-", "8"}], " ", 
             RowBox[{"(", 
              RowBox[{
               RowBox[{"-", "1"}], "+", "c"}], ")"}], " ", "sf", " ", 
             RowBox[{"(", 
              RowBox[{
               RowBox[{"-", "1"}], "-", "\[Delta]", "+", 
               RowBox[{"h", " ", 
                RowBox[{"(", 
                 RowBox[{"2", "+", "\[Delta]"}], ")"}]}]}], ")"}], " ", 
             RowBox[{"(", 
              RowBox[{"1", "+", 
               RowBox[{"h", " ", "sf"}], "+", 
               RowBox[{"c", " ", 
                RowBox[{"(", 
                 RowBox[{
                  RowBox[{"-", "1"}], "-", 
                  RowBox[{"2", " ", "\[Delta]"}], "+", 
                  RowBox[{"h", " ", "sf", " ", 
                   RowBox[{"(", 
                    RowBox[{"3", "+", 
                    RowBox[{"2", " ", "\[Delta]"}]}], ")"}]}]}], ")"}]}]}], 
              ")"}]}], "+", 
            SuperscriptBox[
             RowBox[{"(", 
              RowBox[{
               RowBox[{
                RowBox[{"(", 
                 RowBox[{
                  RowBox[{"-", "1"}], "+", 
                  RowBox[{"h", " ", "sf"}]}], ")"}], " ", "\[Delta]"}], "+", 
               RowBox[{"c", " ", 
                RowBox[{"(", 
                 RowBox[{"\[Delta]", "+", 
                  RowBox[{"sf", " ", 
                   RowBox[{"(", 
                    RowBox[{"4", "-", 
                    RowBox[{"8", " ", "h"}], "+", 
                    RowBox[{"4", " ", "\[Delta]"}], "-", 
                    RowBox[{"5", " ", "h", " ", "\[Delta]"}]}], ")"}]}]}], 
                 ")"}]}]}], ")"}], "2"]}]]}], "-", 
         RowBox[{"4", " ", "h", " ", "sf", " ", 
          SqrtBox[
           RowBox[{
            RowBox[{
             RowBox[{"-", "8"}], " ", 
             RowBox[{"(", 
              RowBox[{
               RowBox[{"-", "1"}], "+", "c"}], ")"}], " ", "sf", " ", 
             RowBox[{"(", 
              RowBox[{
               RowBox[{"-", "1"}], "-", "\[Delta]", "+", 
               RowBox[{"h", " ", 
                RowBox[{"(", 
                 RowBox[{"2", "+", "\[Delta]"}], ")"}]}]}], ")"}], " ", 
             RowBox[{"(", 
              RowBox[{"1", "+", 
               RowBox[{"h", " ", "sf"}], "+", 
               RowBox[{"c", " ", 
                RowBox[{"(", 
                 RowBox[{
                  RowBox[{"-", "1"}], "-", 
                  RowBox[{"2", " ", "\[Delta]"}], "+", 
                  RowBox[{"h", " ", "sf", " ", 
                   RowBox[{"(", 
                    RowBox[{"3", "+", 
                    RowBox[{"2", " ", "\[Delta]"}]}], ")"}]}]}], ")"}]}]}], 
              ")"}]}], "+", 
            SuperscriptBox[
             RowBox[{"(", 
              RowBox[{
               RowBox[{
                RowBox[{"(", 
                 RowBox[{
                  RowBox[{"-", "1"}], "+", 
                  RowBox[{"h", " ", "sf"}]}], ")"}], " ", "\[Delta]"}], "+", 
               RowBox[{"c", " ", 
                RowBox[{"(", 
                 RowBox[{"\[Delta]", "+", 
                  RowBox[{"sf", " ", 
                   RowBox[{"(", 
                    RowBox[{"4", "-", 
                    RowBox[{"8", " ", "h"}], "+", 
                    RowBox[{"4", " ", "\[Delta]"}], "-", 
                    RowBox[{"5", " ", "h", " ", "\[Delta]"}]}], ")"}]}]}], 
                 ")"}]}]}], ")"}], "2"]}]]}], "-", 
         RowBox[{"4", " ", "c", " ", "h", " ", "sf", " ", 
          SqrtBox[
           RowBox[{
            RowBox[{
             RowBox[{"-", "8"}], " ", 
             RowBox[{"(", 
              RowBox[{
               RowBox[{"-", "1"}], "+", "c"}], ")"}], " ", "sf", " ", 
             RowBox[{"(", 
              RowBox[{
               RowBox[{"-", "1"}], "-", "\[Delta]", "+", 
               RowBox[{"h", " ", 
                RowBox[{"(", 
                 RowBox[{"2", "+", "\[Delta]"}], ")"}]}]}], ")"}], " ", 
             RowBox[{"(", 
              RowBox[{"1", "+", 
               RowBox[{"h", " ", "sf"}], "+", 
               RowBox[{"c", " ", 
                RowBox[{"(", 
                 RowBox[{
                  RowBox[{"-", "1"}], "-", 
                  RowBox[{"2", " ", "\[Delta]"}], "+", 
                  RowBox[{"h", " ", "sf", " ", 
                   RowBox[{"(", 
                    RowBox[{"3", "+", 
                    RowBox[{"2", " ", "\[Delta]"}]}], ")"}]}]}], ")"}]}]}], 
              ")"}]}], "+", 
            SuperscriptBox[
             RowBox[{"(", 
              RowBox[{
               RowBox[{
                RowBox[{"(", 
                 RowBox[{
                  RowBox[{"-", "1"}], "+", 
                  RowBox[{"h", " ", "sf"}]}], ")"}], " ", "\[Delta]"}], "+", 
               RowBox[{"c", " ", 
                RowBox[{"(", 
                 RowBox[{"\[Delta]", "+", 
                  RowBox[{"sf", " ", 
                   RowBox[{"(", 
                    RowBox[{"4", "-", 
                    RowBox[{"8", " ", "h"}], "+", 
                    RowBox[{"4", " ", "\[Delta]"}], "-", 
                    RowBox[{"5", " ", "h", " ", "\[Delta]"}]}], ")"}]}]}], 
                 ")"}]}]}], ")"}], "2"]}]]}], "-", 
         RowBox[{"2", " ", "h", " ", 
          SuperscriptBox["sf", "2"], " ", 
          SqrtBox[
           RowBox[{
            RowBox[{
             RowBox[{"-", "8"}], " ", 
             RowBox[{"(", 
              RowBox[{
               RowBox[{"-", "1"}], "+", "c"}], ")"}], " ", "sf", " ", 
             RowBox[{"(", 
              RowBox[{
               RowBox[{"-", "1"}], "-", "\[Delta]", "+", 
               RowBox[{"h", " ", 
                RowBox[{"(", 
                 RowBox[{"2", "+", "\[Delta]"}], ")"}]}]}], ")"}], " ", 
             RowBox[{"(", 
              RowBox[{"1", "+", 
               RowBox[{"h", " ", "sf"}], "+", 
               RowBox[{"c", " ", 
                RowBox[{"(", 
                 RowBox[{
                  RowBox[{"-", "1"}], "-", 
                  RowBox[{"2", " ", "\[Delta]"}], "+", 
                  RowBox[{"h", " ", "sf", " ", 
                   RowBox[{"(", 
                    RowBox[{"3", "+", 
                    RowBox[{"2", " ", "\[Delta]"}]}], ")"}]}]}], ")"}]}]}], 
              ")"}]}], "+", 
            SuperscriptBox[
             RowBox[{"(", 
              RowBox[{
               RowBox[{
                RowBox[{"(", 
                 RowBox[{
                  RowBox[{"-", "1"}], "+", 
                  RowBox[{"h", " ", "sf"}]}], ")"}], " ", "\[Delta]"}], "+", 
               RowBox[{"c", " ", 
                RowBox[{"(", 
                 RowBox[{"\[Delta]", "+", 
                  RowBox[{"sf", " ", 
                   RowBox[{"(", 
                    RowBox[{"4", "-", 
                    RowBox[{"8", " ", "h"}], "+", 
                    RowBox[{"4", " ", "\[Delta]"}], "-", 
                    RowBox[{"5", " ", "h", " ", "\[Delta]"}]}], ")"}]}]}], 
                 ")"}]}]}], ")"}], "2"]}]]}], "+", 
         RowBox[{"2", " ", "c", " ", "h", " ", 
          SuperscriptBox["sf", "2"], " ", 
          SqrtBox[
           RowBox[{
            RowBox[{
             RowBox[{"-", "8"}], " ", 
             RowBox[{"(", 
              RowBox[{
               RowBox[{"-", "1"}], "+", "c"}], ")"}], " ", "sf", " ", 
             RowBox[{"(", 
              RowBox[{
               RowBox[{"-", "1"}], "-", "\[Delta]", "+", 
               RowBox[{"h", " ", 
                RowBox[{"(", 
                 RowBox[{"2", "+", "\[Delta]"}], ")"}]}]}], ")"}], " ", 
             RowBox[{"(", 
              RowBox[{"1", "+", 
               RowBox[{"h", " ", "sf"}], "+", 
               RowBox[{"c", " ", 
                RowBox[{"(", 
                 RowBox[{
                  RowBox[{"-", "1"}], "-", 
                  RowBox[{"2", " ", "\[Delta]"}], "+", 
                  RowBox[{"h", " ", "sf", " ", 
                   RowBox[{"(", 
                    RowBox[{"3", "+", 
                    RowBox[{"2", " ", "\[Delta]"}]}], ")"}]}]}], ")"}]}]}], 
              ")"}]}], "+", 
            SuperscriptBox[
             RowBox[{"(", 
              RowBox[{
               RowBox[{
                RowBox[{"(", 
                 RowBox[{
                  RowBox[{"-", "1"}], "+", 
                  RowBox[{"h", " ", "sf"}]}], ")"}], " ", "\[Delta]"}], "+", 
               RowBox[{"c", " ", 
                RowBox[{"(", 
                 RowBox[{"\[Delta]", "+", 
                  RowBox[{"sf", " ", 
                   RowBox[{"(", 
                    RowBox[{"4", "-", 
                    RowBox[{"8", " ", "h"}], "+", 
                    RowBox[{"4", " ", "\[Delta]"}], "-", 
                    RowBox[{"5", " ", "h", " ", "\[Delta]"}]}], ")"}]}]}], 
                 ")"}]}]}], ")"}], "2"]}]]}], "+", 
         RowBox[{"4", " ", 
          SuperscriptBox["h", "2"], " ", 
          SuperscriptBox["sf", "2"], " ", 
          SqrtBox[
           RowBox[{
            RowBox[{
             RowBox[{"-", "8"}], " ", 
             RowBox[{"(", 
              RowBox[{
               RowBox[{"-", "1"}], "+", "c"}], ")"}], " ", "sf", " ", 
             RowBox[{"(", 
              RowBox[{
               RowBox[{"-", "1"}], "-", "\[Delta]", "+", 
               RowBox[{"h", " ", 
                RowBox[{"(", 
                 RowBox[{"2", "+", "\[Delta]"}], ")"}]}]}], ")"}], " ", 
             RowBox[{"(", 
              RowBox[{"1", "+", 
               RowBox[{"h", " ", "sf"}], "+", 
               RowBox[{"c", " ", 
                RowBox[{"(", 
                 RowBox[{
                  RowBox[{"-", "1"}], "-", 
                  RowBox[{"2", " ", "\[Delta]"}], "+", 
                  RowBox[{"h", " ", "sf", " ", 
                   RowBox[{"(", 
                    RowBox[{"3", "+", 
                    RowBox[{"2", " ", "\[Delta]"}]}], ")"}]}]}], ")"}]}]}], 
              ")"}]}], "+", 
            SuperscriptBox[
             RowBox[{"(", 
              RowBox[{
               RowBox[{
                RowBox[{"(", 
                 RowBox[{
                  RowBox[{"-", "1"}], "+", 
                  RowBox[{"h", " ", "sf"}]}], ")"}], " ", "\[Delta]"}], "+", 
               RowBox[{"c", " ", 
                RowBox[{"(", 
                 RowBox[{"\[Delta]", "+", 
                  RowBox[{"sf", " ", 
                   RowBox[{"(", 
                    RowBox[{"4", "-", 
                    RowBox[{"8", " ", "h"}], "+", 
                    RowBox[{"4", " ", "\[Delta]"}], "-", 
                    RowBox[{"5", " ", "h", " ", "\[Delta]"}]}], ")"}]}]}], 
                 ")"}]}]}], ")"}], "2"]}]]}], "+", 
         RowBox[{"4", " ", "c", " ", 
          SuperscriptBox["h", "2"], " ", 
          SuperscriptBox["sf", "2"], " ", 
          SqrtBox[
           RowBox[{
            RowBox[{
             RowBox[{"-", "8"}], " ", 
             RowBox[{"(", 
              RowBox[{
               RowBox[{"-", "1"}], "+", "c"}], ")"}], " ", "sf", " ", 
             RowBox[{"(", 
              RowBox[{
               RowBox[{"-", "1"}], "-", "\[Delta]", "+", 
               RowBox[{"h", " ", 
                RowBox[{"(", 
                 RowBox[{"2", "+", "\[Delta]"}], ")"}]}]}], ")"}], " ", 
             RowBox[{"(", 
              RowBox[{"1", "+", 
               RowBox[{"h", " ", "sf"}], "+", 
               RowBox[{"c", " ", 
                RowBox[{"(", 
                 RowBox[{
                  RowBox[{"-", "1"}], "-", 
                  RowBox[{"2", " ", "\[Delta]"}], "+", 
                  RowBox[{"h", " ", "sf", " ", 
                   RowBox[{"(", 
                    RowBox[{"3", "+", 
                    RowBox[{"2", " ", "\[Delta]"}]}], ")"}]}]}], ")"}]}]}], 
              ")"}]}], "+", 
            SuperscriptBox[
             RowBox[{"(", 
              RowBox[{
               RowBox[{
                RowBox[{"(", 
                 RowBox[{
                  RowBox[{"-", "1"}], "+", 
                  RowBox[{"h", " ", "sf"}]}], ")"}], " ", "\[Delta]"}], "+", 
               RowBox[{"c", " ", 
                RowBox[{"(", 
                 RowBox[{"\[Delta]", "+", 
                  RowBox[{"sf", " ", 
                   RowBox[{"(", 
                    RowBox[{"4", "-", 
                    RowBox[{"8", " ", "h"}], "+", 
                    RowBox[{"4", " ", "\[Delta]"}], "-", 
                    RowBox[{"5", " ", "h", " ", "\[Delta]"}]}], ")"}]}]}], 
                 ")"}]}]}], ")"}], "2"]}]]}], "-", 
         RowBox[{
          SuperscriptBox["h", "2"], " ", 
          SuperscriptBox["sf", "3"], " ", 
          SqrtBox[
           RowBox[{
            RowBox[{
             RowBox[{"-", "8"}], " ", 
             RowBox[{"(", 
              RowBox[{
               RowBox[{"-", "1"}], "+", "c"}], ")"}], " ", "sf", " ", 
             RowBox[{"(", 
              RowBox[{
               RowBox[{"-", "1"}], "-", "\[Delta]", "+", 
               RowBox[{"h", " ", 
                RowBox[{"(", 
                 RowBox[{"2", "+", "\[Delta]"}], ")"}]}]}], ")"}], " ", 
             RowBox[{"(", 
              RowBox[{"1", "+", 
               RowBox[{"h", " ", "sf"}], "+", 
               RowBox[{"c", " ", 
                RowBox[{"(", 
                 RowBox[{
                  RowBox[{"-", "1"}], "-", 
                  RowBox[{"2", " ", "\[Delta]"}], "+", 
                  RowBox[{"h", " ", "sf", " ", 
                   RowBox[{"(", 
                    RowBox[{"3", "+", 
                    RowBox[{"2", " ", "\[Delta]"}]}], ")"}]}]}], ")"}]}]}], 
              ")"}]}], "+", 
            SuperscriptBox[
             RowBox[{"(", 
              RowBox[{
               RowBox[{
                RowBox[{"(", 
                 RowBox[{
                  RowBox[{"-", "1"}], "+", 
                  RowBox[{"h", " ", "sf"}]}], ")"}], " ", "\[Delta]"}], "+", 
               RowBox[{"c", " ", 
                RowBox[{"(", 
                 RowBox[{"\[Delta]", "+", 
                  RowBox[{"sf", " ", 
                   RowBox[{"(", 
                    RowBox[{"4", "-", 
                    RowBox[{"8", " ", "h"}], "+", 
                    RowBox[{"4", " ", "\[Delta]"}], "-", 
                    RowBox[{"5", " ", "h", " ", "\[Delta]"}]}], ")"}]}]}], 
                 ")"}]}]}], ")"}], "2"]}]]}], "-", 
         RowBox[{"3", " ", "c", " ", 
          SuperscriptBox["h", "2"], " ", 
          SuperscriptBox["sf", "3"], " ", 
          SqrtBox[
           RowBox[{
            RowBox[{
             RowBox[{"-", "8"}], " ", 
             RowBox[{"(", 
              RowBox[{
               RowBox[{"-", "1"}], "+", "c"}], ")"}], " ", "sf", " ", 
             RowBox[{"(", 
              RowBox[{
               RowBox[{"-", "1"}], "-", "\[Delta]", "+", 
               RowBox[{"h", " ", 
                RowBox[{"(", 
                 RowBox[{"2", "+", "\[Delta]"}], ")"}]}]}], ")"}], " ", 
             RowBox[{"(", 
              RowBox[{"1", "+", 
               RowBox[{"h", " ", "sf"}], "+", 
               RowBox[{"c", " ", 
                RowBox[{"(", 
                 RowBox[{
                  RowBox[{"-", "1"}], "-", 
                  RowBox[{"2", " ", "\[Delta]"}], "+", 
                  RowBox[{"h", " ", "sf", " ", 
                   RowBox[{"(", 
                    RowBox[{"3", "+", 
                    RowBox[{"2", " ", "\[Delta]"}]}], ")"}]}]}], ")"}]}]}], 
              ")"}]}], "+", 
            SuperscriptBox[
             RowBox[{"(", 
              RowBox[{
               RowBox[{
                RowBox[{"(", 
                 RowBox[{
                  RowBox[{"-", "1"}], "+", 
                  RowBox[{"h", " ", "sf"}]}], ")"}], " ", "\[Delta]"}], "+", 
               RowBox[{"c", " ", 
                RowBox[{"(", 
                 RowBox[{"\[Delta]", "+", 
                  RowBox[{"sf", " ", 
                   RowBox[{"(", 
                    RowBox[{"4", "-", 
                    RowBox[{"8", " ", "h"}], "+", 
                    RowBox[{"4", " ", "\[Delta]"}], "-", 
                    RowBox[{"5", " ", "h", " ", "\[Delta]"}]}], ")"}]}]}], 
                 ")"}]}]}], ")"}], "2"]}]]}], "-", 
         RowBox[{"\[Delta]", " ", 
          SqrtBox[
           RowBox[{
            RowBox[{
             RowBox[{"-", "8"}], " ", 
             RowBox[{"(", 
              RowBox[{
               RowBox[{"-", "1"}], "+", "c"}], ")"}], " ", "sf", " ", 
             RowBox[{"(", 
              RowBox[{
               RowBox[{"-", "1"}], "-", "\[Delta]", "+", 
               RowBox[{"h", " ", 
                RowBox[{"(", 
                 RowBox[{"2", "+", "\[Delta]"}], ")"}]}]}], ")"}], " ", 
             RowBox[{"(", 
              RowBox[{"1", "+", 
               RowBox[{"h", " ", "sf"}], "+", 
               RowBox[{"c", " ", 
                RowBox[{"(", 
                 RowBox[{
                  RowBox[{"-", "1"}], "-", 
                  RowBox[{"2", " ", "\[Delta]"}], "+", 
                  RowBox[{"h", " ", "sf", " ", 
                   RowBox[{"(", 
                    RowBox[{"3", "+", 
                    RowBox[{"2", " ", "\[Delta]"}]}], ")"}]}]}], ")"}]}]}], 
              ")"}]}], "+", 
            SuperscriptBox[
             RowBox[{"(", 
              RowBox[{
               RowBox[{
                RowBox[{"(", 
                 RowBox[{
                  RowBox[{"-", "1"}], "+", 
                  RowBox[{"h", " ", "sf"}]}], ")"}], " ", "\[Delta]"}], "+", 
               RowBox[{"c", " ", 
                RowBox[{"(", 
                 RowBox[{"\[Delta]", "+", 
                  RowBox[{"sf", " ", 
                   RowBox[{"(", 
                    RowBox[{"4", "-", 
                    RowBox[{"8", " ", "h"}], "+", 
                    RowBox[{"4", " ", "\[Delta]"}], "-", 
                    RowBox[{"5", " ", "h", " ", "\[Delta]"}]}], ")"}]}]}], 
                 ")"}]}]}], ")"}], "2"]}]]}], "+", 
         RowBox[{"c", " ", "\[Delta]", " ", 
          SqrtBox[
           RowBox[{
            RowBox[{
             RowBox[{"-", "8"}], " ", 
             RowBox[{"(", 
              RowBox[{
               RowBox[{"-", "1"}], "+", "c"}], ")"}], " ", "sf", " ", 
             RowBox[{"(", 
              RowBox[{
               RowBox[{"-", "1"}], "-", "\[Delta]", "+", 
               RowBox[{"h", " ", 
                RowBox[{"(", 
                 RowBox[{"2", "+", "\[Delta]"}], ")"}]}]}], ")"}], " ", 
             RowBox[{"(", 
              RowBox[{"1", "+", 
               RowBox[{"h", " ", "sf"}], "+", 
               RowBox[{"c", " ", 
                RowBox[{"(", 
                 RowBox[{
                  RowBox[{"-", "1"}], "-", 
                  RowBox[{"2", " ", "\[Delta]"}], "+", 
                  RowBox[{"h", " ", "sf", " ", 
                   RowBox[{"(", 
                    RowBox[{"3", "+", 
                    RowBox[{"2", " ", "\[Delta]"}]}], ")"}]}]}], ")"}]}]}], 
              ")"}]}], "+", 
            SuperscriptBox[
             RowBox[{"(", 
              RowBox[{
               RowBox[{
                RowBox[{"(", 
                 RowBox[{
                  RowBox[{"-", "1"}], "+", 
                  RowBox[{"h", " ", "sf"}]}], ")"}], " ", "\[Delta]"}], "+", 
               RowBox[{"c", " ", 
                RowBox[{"(", 
                 RowBox[{"\[Delta]", "+", 
                  RowBox[{"sf", " ", 
                   RowBox[{"(", 
                    RowBox[{"4", "-", 
                    RowBox[{"8", " ", "h"}], "+", 
                    RowBox[{"4", " ", "\[Delta]"}], "-", 
                    RowBox[{"5", " ", "h", " ", "\[Delta]"}]}], ")"}]}]}], 
                 ")"}]}]}], ")"}], "2"]}]]}], "+", 
         RowBox[{"2", " ", "sf", " ", "\[Delta]", " ", 
          SqrtBox[
           RowBox[{
            RowBox[{
             RowBox[{"-", "8"}], " ", 
             RowBox[{"(", 
              RowBox[{
               RowBox[{"-", "1"}], "+", "c"}], ")"}], " ", "sf", " ", 
             RowBox[{"(", 
              RowBox[{
               RowBox[{"-", "1"}], "-", "\[Delta]", "+", 
               RowBox[{"h", " ", 
                RowBox[{"(", 
                 RowBox[{"2", "+", "\[Delta]"}], ")"}]}]}], ")"}], " ", 
             RowBox[{"(", 
              RowBox[{"1", "+", 
               RowBox[{"h", " ", "sf"}], "+", 
               RowBox[{"c", " ", 
                RowBox[{"(", 
                 RowBox[{
                  RowBox[{"-", "1"}], "-", 
                  RowBox[{"2", " ", "\[Delta]"}], "+", 
                  RowBox[{"h", " ", "sf", " ", 
                   RowBox[{"(", 
                    RowBox[{"3", "+", 
                    RowBox[{"2", " ", "\[Delta]"}]}], ")"}]}]}], ")"}]}]}], 
              ")"}]}], "+", 
            SuperscriptBox[
             RowBox[{"(", 
              RowBox[{
               RowBox[{
                RowBox[{"(", 
                 RowBox[{
                  RowBox[{"-", "1"}], "+", 
                  RowBox[{"h", " ", "sf"}]}], ")"}], " ", "\[Delta]"}], "+", 
               RowBox[{"c", " ", 
                RowBox[{"(", 
                 RowBox[{"\[Delta]", "+", 
                  RowBox[{"sf", " ", 
                   RowBox[{"(", 
                    RowBox[{"4", "-", 
                    RowBox[{"8", " ", "h"}], "+", 
                    RowBox[{"4", " ", "\[Delta]"}], "-", 
                    RowBox[{"5", " ", "h", " ", "\[Delta]"}]}], ")"}]}]}], 
                 ")"}]}]}], ")"}], "2"]}]]}], "-", 
         RowBox[{"4", " ", "c", " ", "h", " ", "sf", " ", "\[Delta]", " ", 
          SqrtBox[
           RowBox[{
            RowBox[{
             RowBox[{"-", "8"}], " ", 
             RowBox[{"(", 
              RowBox[{
               RowBox[{"-", "1"}], "+", "c"}], ")"}], " ", "sf", " ", 
             RowBox[{"(", 
              RowBox[{
               RowBox[{"-", "1"}], "-", "\[Delta]", "+", 
               RowBox[{"h", " ", 
                RowBox[{"(", 
                 RowBox[{"2", "+", "\[Delta]"}], ")"}]}]}], ")"}], " ", 
             RowBox[{"(", 
              RowBox[{"1", "+", 
               RowBox[{"h", " ", "sf"}], "+", 
               RowBox[{"c", " ", 
                RowBox[{"(", 
                 RowBox[{
                  RowBox[{"-", "1"}], "-", 
                  RowBox[{"2", " ", "\[Delta]"}], "+", 
                  RowBox[{"h", " ", "sf", " ", 
                   RowBox[{"(", 
                    RowBox[{"3", "+", 
                    RowBox[{"2", " ", "\[Delta]"}]}], ")"}]}]}], ")"}]}]}], 
              ")"}]}], "+", 
            SuperscriptBox[
             RowBox[{"(", 
              RowBox[{
               RowBox[{
                RowBox[{"(", 
                 RowBox[{
                  RowBox[{"-", "1"}], "+", 
                  RowBox[{"h", " ", "sf"}]}], ")"}], " ", "\[Delta]"}], "+", 
               RowBox[{"c", " ", 
                RowBox[{"(", 
                 RowBox[{"\[Delta]", "+", 
                  RowBox[{"sf", " ", 
                   RowBox[{"(", 
                    RowBox[{"4", "-", 
                    RowBox[{"8", " ", "h"}], "+", 
                    RowBox[{"4", " ", "\[Delta]"}], "-", 
                    RowBox[{"5", " ", "h", " ", "\[Delta]"}]}], ")"}]}]}], 
                 ")"}]}]}], ")"}], "2"]}]]}], "-", 
         RowBox[{"2", " ", "h", " ", 
          SuperscriptBox["sf", "2"], " ", "\[Delta]", " ", 
          SqrtBox[
           RowBox[{
            RowBox[{
             RowBox[{"-", "8"}], " ", 
             RowBox[{"(", 
              RowBox[{
               RowBox[{"-", "1"}], "+", "c"}], ")"}], " ", "sf", " ", 
             RowBox[{"(", 
              RowBox[{
               RowBox[{"-", "1"}], "-", "\[Delta]", "+", 
               RowBox[{"h", " ", 
                RowBox[{"(", 
                 RowBox[{"2", "+", "\[Delta]"}], ")"}]}]}], ")"}], " ", 
             RowBox[{"(", 
              RowBox[{"1", "+", 
               RowBox[{"h", " ", "sf"}], "+", 
               RowBox[{"c", " ", 
                RowBox[{"(", 
                 RowBox[{
                  RowBox[{"-", "1"}], "-", 
                  RowBox[{"2", " ", "\[Delta]"}], "+", 
                  RowBox[{"h", " ", "sf", " ", 
                   RowBox[{"(", 
                    RowBox[{"3", "+", 
                    RowBox[{"2", " ", "\[Delta]"}]}], ")"}]}]}], ")"}]}]}], 
              ")"}]}], "+", 
            SuperscriptBox[
             RowBox[{"(", 
              RowBox[{
               RowBox[{
                RowBox[{"(", 
                 RowBox[{
                  RowBox[{"-", "1"}], "+", 
                  RowBox[{"h", " ", "sf"}]}], ")"}], " ", "\[Delta]"}], "+", 
               RowBox[{"c", " ", 
                RowBox[{"(", 
                 RowBox[{"\[Delta]", "+", 
                  RowBox[{"sf", " ", 
                   RowBox[{"(", 
                    RowBox[{"4", "-", 
                    RowBox[{"8", " ", "h"}], "+", 
                    RowBox[{"4", " ", "\[Delta]"}], "-", 
                    RowBox[{"5", " ", "h", " ", "\[Delta]"}]}], ")"}]}]}], 
                 ")"}]}]}], ")"}], "2"]}]]}], "+", 
         RowBox[{"2", " ", "c", " ", "h", " ", 
          SuperscriptBox["sf", "2"], " ", "\[Delta]", " ", 
          SqrtBox[
           RowBox[{
            RowBox[{
             RowBox[{"-", "8"}], " ", 
             RowBox[{"(", 
              RowBox[{
               RowBox[{"-", "1"}], "+", "c"}], ")"}], " ", "sf", " ", 
             RowBox[{"(", 
              RowBox[{
               RowBox[{"-", "1"}], "-", "\[Delta]", "+", 
               RowBox[{"h", " ", 
                RowBox[{"(", 
                 RowBox[{"2", "+", "\[Delta]"}], ")"}]}]}], ")"}], " ", 
             RowBox[{"(", 
              RowBox[{"1", "+", 
               RowBox[{"h", " ", "sf"}], "+", 
               RowBox[{"c", " ", 
                RowBox[{"(", 
                 RowBox[{
                  RowBox[{"-", "1"}], "-", 
                  RowBox[{"2", " ", "\[Delta]"}], "+", 
                  RowBox[{"h", " ", "sf", " ", 
                   RowBox[{"(", 
                    RowBox[{"3", "+", 
                    RowBox[{"2", " ", "\[Delta]"}]}], ")"}]}]}], ")"}]}]}], 
              ")"}]}], "+", 
            SuperscriptBox[
             RowBox[{"(", 
              RowBox[{
               RowBox[{
                RowBox[{"(", 
                 RowBox[{
                  RowBox[{"-", "1"}], "+", 
                  RowBox[{"h", " ", "sf"}]}], ")"}], " ", "\[Delta]"}], "+", 
               RowBox[{"c", " ", 
                RowBox[{"(", 
                 RowBox[{"\[Delta]", "+", 
                  RowBox[{"sf", " ", 
                   RowBox[{"(", 
                    RowBox[{"4", "-", 
                    RowBox[{"8", " ", "h"}], "+", 
                    RowBox[{"4", " ", "\[Delta]"}], "-", 
                    RowBox[{"5", " ", "h", " ", "\[Delta]"}]}], ")"}]}]}], 
                 ")"}]}]}], ")"}], "2"]}]]}], "+", 
         RowBox[{
          SuperscriptBox["h", "2"], " ", 
          SuperscriptBox["sf", "2"], " ", "\[Delta]", " ", 
          SqrtBox[
           RowBox[{
            RowBox[{
             RowBox[{"-", "8"}], " ", 
             RowBox[{"(", 
              RowBox[{
               RowBox[{"-", "1"}], "+", "c"}], ")"}], " ", "sf", " ", 
             RowBox[{"(", 
              RowBox[{
               RowBox[{"-", "1"}], "-", "\[Delta]", "+", 
               RowBox[{"h", " ", 
                RowBox[{"(", 
                 RowBox[{"2", "+", "\[Delta]"}], ")"}]}]}], ")"}], " ", 
             RowBox[{"(", 
              RowBox[{"1", "+", 
               RowBox[{"h", " ", "sf"}], "+", 
               RowBox[{"c", " ", 
                RowBox[{"(", 
                 RowBox[{
                  RowBox[{"-", "1"}], "-", 
                  RowBox[{"2", " ", "\[Delta]"}], "+", 
                  RowBox[{"h", " ", "sf", " ", 
                   RowBox[{"(", 
                    RowBox[{"3", "+", 
                    RowBox[{"2", " ", "\[Delta]"}]}], ")"}]}]}], ")"}]}]}], 
              ")"}]}], "+", 
            SuperscriptBox[
             RowBox[{"(", 
              RowBox[{
               RowBox[{
                RowBox[{"(", 
                 RowBox[{
                  RowBox[{"-", "1"}], "+", 
                  RowBox[{"h", " ", "sf"}]}], ")"}], " ", "\[Delta]"}], "+", 
               RowBox[{"c", " ", 
                RowBox[{"(", 
                 RowBox[{"\[Delta]", "+", 
                  RowBox[{"sf", " ", 
                   RowBox[{"(", 
                    RowBox[{"4", "-", 
                    RowBox[{"8", " ", "h"}], "+", 
                    RowBox[{"4", " ", "\[Delta]"}], "-", 
                    RowBox[{"5", " ", "h", " ", "\[Delta]"}]}], ")"}]}]}], 
                 ")"}]}]}], ")"}], "2"]}]]}], "+", 
         RowBox[{"3", " ", "c", " ", 
          SuperscriptBox["h", "2"], " ", 
          SuperscriptBox["sf", "2"], " ", "\[Delta]", " ", 
          SqrtBox[
           RowBox[{
            RowBox[{
             RowBox[{"-", "8"}], " ", 
             RowBox[{"(", 
              RowBox[{
               RowBox[{"-", "1"}], "+", "c"}], ")"}], " ", "sf", " ", 
             RowBox[{"(", 
              RowBox[{
               RowBox[{"-", "1"}], "-", "\[Delta]", "+", 
               RowBox[{"h", " ", 
                RowBox[{"(", 
                 RowBox[{"2", "+", "\[Delta]"}], ")"}]}]}], ")"}], " ", 
             RowBox[{"(", 
              RowBox[{"1", "+", 
               RowBox[{"h", " ", "sf"}], "+", 
               RowBox[{"c", " ", 
                RowBox[{"(", 
                 RowBox[{
                  RowBox[{"-", "1"}], "-", 
                  RowBox[{"2", " ", "\[Delta]"}], "+", 
                  RowBox[{"h", " ", "sf", " ", 
                   RowBox[{"(", 
                    RowBox[{"3", "+", 
                    RowBox[{"2", " ", "\[Delta]"}]}], ")"}]}]}], ")"}]}]}], 
              ")"}]}], "+", 
            SuperscriptBox[
             RowBox[{"(", 
              RowBox[{
               RowBox[{
                RowBox[{"(", 
                 RowBox[{
                  RowBox[{"-", "1"}], "+", 
                  RowBox[{"h", " ", "sf"}]}], ")"}], " ", "\[Delta]"}], "+", 
               RowBox[{"c", " ", 
                RowBox[{"(", 
                 RowBox[{"\[Delta]", "+", 
                  RowBox[{"sf", " ", 
                   RowBox[{"(", 
                    RowBox[{"4", "-", 
                    RowBox[{"8", " ", "h"}], "+", 
                    RowBox[{"4", " ", "\[Delta]"}], "-", 
                    RowBox[{"5", " ", "h", " ", "\[Delta]"}]}], ")"}]}]}], 
                 ")"}]}]}], ")"}], "2"]}]]}], "-", 
         RowBox[{"2", " ", "c", " ", 
          SuperscriptBox["h", "2"], " ", 
          SuperscriptBox["sf", "3"], " ", "\[Delta]", " ", 
          SqrtBox[
           RowBox[{
            RowBox[{
             RowBox[{"-", "8"}], " ", 
             RowBox[{"(", 
              RowBox[{
               RowBox[{"-", "1"}], "+", "c"}], ")"}], " ", "sf", " ", 
             RowBox[{"(", 
              RowBox[{
               RowBox[{"-", "1"}], "-", "\[Delta]", "+", 
               RowBox[{"h", " ", 
                RowBox[{"(", 
                 RowBox[{"2", "+", "\[Delta]"}], ")"}]}]}], ")"}], " ", 
             RowBox[{"(", 
              RowBox[{"1", "+", 
               RowBox[{"h", " ", "sf"}], "+", 
               RowBox[{"c", " ", 
                RowBox[{"(", 
                 RowBox[{
                  RowBox[{"-", "1"}], "-", 
                  RowBox[{"2", " ", "\[Delta]"}], "+", 
                  RowBox[{"h", " ", "sf", " ", 
                   RowBox[{"(", 
                    RowBox[{"3", "+", 
                    RowBox[{"2", " ", "\[Delta]"}]}], ")"}]}]}], ")"}]}]}], 
              ")"}]}], "+", 
            SuperscriptBox[
             RowBox[{"(", 
              RowBox[{
               RowBox[{
                RowBox[{"(", 
                 RowBox[{
                  RowBox[{"-", "1"}], "+", 
                  RowBox[{"h", " ", "sf"}]}], ")"}], " ", "\[Delta]"}], "+", 
               RowBox[{"c", " ", 
                RowBox[{"(", 
                 RowBox[{"\[Delta]", "+", 
                  RowBox[{"sf", " ", 
                   RowBox[{"(", 
                    RowBox[{"4", "-", 
                    RowBox[{"8", " ", "h"}], "+", 
                    RowBox[{"4", " ", "\[Delta]"}], "-", 
                    RowBox[{"5", " ", "h", " ", "\[Delta]"}]}], ")"}]}]}], 
                 ")"}]}]}], ")"}], "2"]}]]}]}], ")"}], "/", 
       RowBox[{"(", 
        RowBox[{"2", " ", 
         RowBox[{"(", 
          RowBox[{
           RowBox[{
            SuperscriptBox[
             RowBox[{"(", 
              RowBox[{
               RowBox[{"-", "1"}], "+", "c"}], ")"}], "2"], " ", 
            SuperscriptBox["\[Delta]", "2"]}], "+", 
           RowBox[{
            SuperscriptBox["h", "3"], " ", 
            SuperscriptBox["sf", "4"], " ", 
            SuperscriptBox[
             RowBox[{"(", 
              RowBox[{"1", "+", 
               RowBox[{"c", " ", 
                RowBox[{"(", 
                 RowBox[{"3", "+", 
                  RowBox[{"2", " ", "\[Delta]"}]}], ")"}]}]}], ")"}], "2"]}], 
           "+", 
           RowBox[{"sf", " ", 
            RowBox[{"(", 
             RowBox[{"1", "-", 
              RowBox[{"2", " ", "\[Delta]"}], "+", 
              RowBox[{"h", " ", 
               RowBox[{"(", 
                RowBox[{
                 RowBox[{"-", "2"}], "+", 
                 RowBox[{"2", " ", "\[Delta]"}], "-", 
                 RowBox[{"3", " ", 
                  SuperscriptBox["\[Delta]", "2"]}]}], ")"}]}], "+", 
              RowBox[{"2", " ", "c", " ", 
               RowBox[{"(", 
                RowBox[{
                 RowBox[{"-", "1"}], "+", 
                 RowBox[{"2", " ", 
                  SuperscriptBox["\[Delta]", "2"]}], "+", 
                 RowBox[{"h", " ", 
                  RowBox[{"(", 
                   RowBox[{"2", "+", 
                    RowBox[{"2", " ", "\[Delta]"}], "+", 
                    SuperscriptBox["\[Delta]", "2"]}], ")"}]}]}], ")"}]}], 
              "+", 
              RowBox[{
               SuperscriptBox["c", "2"], " ", 
               RowBox[{"(", 
                RowBox[{"1", "+", 
                 RowBox[{"2", " ", "\[Delta]"}], "-", 
                 RowBox[{"h", " ", 
                  RowBox[{"(", 
                   RowBox[{"2", "+", 
                    RowBox[{"6", " ", "\[Delta]"}], "+", 
                    RowBox[{"7", " ", 
                    SuperscriptBox["\[Delta]", "2"]}]}], ")"}]}]}], ")"}]}]}],
              ")"}]}], "-", 
           RowBox[{"h", " ", 
            SuperscriptBox["sf", "3"], " ", 
            RowBox[{"(", 
             RowBox[{
              RowBox[{"2", " ", "c", " ", 
               RowBox[{"(", 
                RowBox[{
                 RowBox[{
                  RowBox[{"-", "4"}], " ", 
                  RowBox[{"(", 
                   RowBox[{"1", "+", "\[Delta]"}], ")"}]}], "+", 
                 RowBox[{"h", " ", 
                  RowBox[{"(", 
                   RowBox[{"3", "-", 
                    RowBox[{"2", " ", 
                    SuperscriptBox["\[Delta]", "2"]}]}], ")"}]}], "+", 
                 RowBox[{
                  SuperscriptBox["h", "2"], " ", 
                  RowBox[{"(", 
                   RowBox[{"6", "+", 
                    RowBox[{"6", " ", "\[Delta]"}], "+", 
                    SuperscriptBox["\[Delta]", "2"]}], ")"}]}]}], ")"}]}], 
              "+", 
              RowBox[{"h", " ", 
               RowBox[{"(", 
                RowBox[{
                 RowBox[{"-", "7"}], "-", 
                 RowBox[{"6", " ", "\[Delta]"}], "+", 
                 RowBox[{"h", " ", 
                  RowBox[{"(", 
                   RowBox[{"10", "+", 
                    RowBox[{"6", " ", "\[Delta]"}], "+", 
                    SuperscriptBox["\[Delta]", "2"]}], ")"}]}]}], ")"}]}], 
              "+", 
              RowBox[{
               SuperscriptBox["c", "2"], " ", 
               RowBox[{"(", 
                RowBox[{
                 RowBox[{
                  RowBox[{"-", "8"}], " ", 
                  RowBox[{"(", 
                   RowBox[{"1", "+", "\[Delta]"}], ")"}]}], "+", 
                 RowBox[{
                  SuperscriptBox["h", "2"], " ", 
                  RowBox[{"(", 
                   RowBox[{"10", "+", 
                    RowBox[{"14", " ", "\[Delta]"}], "+", 
                    RowBox[{"5", " ", 
                    SuperscriptBox["\[Delta]", "2"]}]}], ")"}]}], "+", 
                 RowBox[{"h", " ", 
                  RowBox[{"(", 
                   RowBox[{"17", "+", 
                    RowBox[{"22", " ", "\[Delta]"}], "+", 
                    RowBox[{"8", " ", 
                    SuperscriptBox["\[Delta]", "2"]}]}], ")"}]}]}], ")"}]}]}],
              ")"}]}], "+", 
           RowBox[{
            SuperscriptBox["sf", "2"], " ", 
            RowBox[{"(", 
             RowBox[{
              RowBox[{"8", " ", 
               RowBox[{"(", 
                RowBox[{"1", "+", "\[Delta]"}], ")"}]}], "-", 
              RowBox[{"5", " ", "h", " ", 
               RowBox[{"(", 
                RowBox[{"5", "+", 
                 RowBox[{"4", " ", "\[Delta]"}]}], ")"}]}], "+", 
              RowBox[{
               SuperscriptBox["h", "2"], " ", 
               RowBox[{"(", 
                RowBox[{"20", "+", 
                 RowBox[{"12", " ", "\[Delta]"}], "+", 
                 RowBox[{"3", " ", 
                  SuperscriptBox["\[Delta]", "2"]}]}], ")"}]}], "+", 
              RowBox[{"2", " ", "c", " ", 
               RowBox[{"(", 
                RowBox[{
                 RowBox[{"4", " ", 
                  RowBox[{"(", 
                   RowBox[{"1", "+", "\[Delta]"}], ")"}]}], "+", 
                 RowBox[{
                  SuperscriptBox["h", "2"], " ", 
                  RowBox[{"(", 
                   RowBox[{"12", "+", 
                    RowBox[{"12", " ", "\[Delta]"}], "+", 
                    SuperscriptBox["\[Delta]", "2"]}], ")"}]}], "-", 
                 RowBox[{"h", " ", 
                  RowBox[{"(", 
                   RowBox[{"15", "+", 
                    RowBox[{"18", " ", "\[Delta]"}], "+", 
                    RowBox[{"4", " ", 
                    SuperscriptBox["\[Delta]", "2"]}]}], ")"}]}]}], ")"}]}], 
              "+", 
              RowBox[{
               SuperscriptBox["c", "2"], " ", "h", " ", 
               RowBox[{"(", 
                RowBox[{
                 RowBox[{"-", "9"}], "-", 
                 RowBox[{"8", " ", "\[Delta]"}], "+", 
                 RowBox[{"4", " ", 
                  SuperscriptBox["\[Delta]", "2"]}], "+", 
                 RowBox[{"h", " ", 
                  RowBox[{"(", 
                   RowBox[{"20", "+", 
                    RowBox[{"28", " ", "\[Delta]"}], "+", 
                    RowBox[{"11", " ", 
                    SuperscriptBox["\[Delta]", "2"]}]}], ")"}]}]}], ")"}]}]}],
              ")"}]}]}], ")"}]}], ")"}]}]}]}], "}"}], ",", 
   RowBox[{"{", 
    RowBox[{
     RowBox[{"pm", "\[Rule]", 
      RowBox[{
       FractionBox["1", 
        RowBox[{"4", " ", 
         RowBox[{"(", 
          RowBox[{
           RowBox[{"-", "1"}], "+", "c"}], ")"}], " ", "sf", " ", 
         RowBox[{"(", 
          RowBox[{
           RowBox[{"-", "1"}], "-", "\[Delta]", "+", 
           RowBox[{"h", " ", 
            RowBox[{"(", 
             RowBox[{"2", "+", "\[Delta]"}], ")"}]}]}], ")"}]}]], 
       RowBox[{"(", 
        RowBox[{
         RowBox[{
          RowBox[{"-", "4"}], " ", "c", " ", "sf"}], "+", 
         RowBox[{"8", " ", "c", " ", "h", " ", "sf"}], "+", "\[Delta]", "-", 
         RowBox[{"c", " ", "\[Delta]"}], "-", 
         RowBox[{"4", " ", "c", " ", "sf", " ", "\[Delta]"}], "-", 
         RowBox[{"h", " ", "sf", " ", "\[Delta]"}], "+", 
         RowBox[{"5", " ", "c", " ", "h", " ", "sf", " ", "\[Delta]"}], "+", 
         SqrtBox[
          RowBox[{
           RowBox[{
            RowBox[{"-", "8"}], " ", 
            RowBox[{"(", 
             RowBox[{
              RowBox[{"-", "1"}], "+", "c"}], ")"}], " ", "sf", " ", 
            RowBox[{"(", 
             RowBox[{
              RowBox[{"-", "1"}], "-", "\[Delta]", "+", 
              RowBox[{"h", " ", 
               RowBox[{"(", 
                RowBox[{"2", "+", "\[Delta]"}], ")"}]}]}], ")"}], " ", 
            RowBox[{"(", 
             RowBox[{"1", "+", 
              RowBox[{"h", " ", "sf"}], "+", 
              RowBox[{"c", " ", 
               RowBox[{"(", 
                RowBox[{
                 RowBox[{"-", "1"}], "-", 
                 RowBox[{"2", " ", "\[Delta]"}], "+", 
                 RowBox[{"h", " ", "sf", " ", 
                  RowBox[{"(", 
                   RowBox[{"3", "+", 
                    RowBox[{"2", " ", "\[Delta]"}]}], ")"}]}]}], ")"}]}]}], 
             ")"}]}], "+", 
           SuperscriptBox[
            RowBox[{"(", 
             RowBox[{
              RowBox[{
               RowBox[{"(", 
                RowBox[{
                 RowBox[{"-", "1"}], "+", 
                 RowBox[{"h", " ", "sf"}]}], ")"}], " ", "\[Delta]"}], "+", 
              RowBox[{"c", " ", 
               RowBox[{"(", 
                RowBox[{"\[Delta]", "+", 
                 RowBox[{"sf", " ", 
                  RowBox[{"(", 
                   RowBox[{"4", "-", 
                    RowBox[{"8", " ", "h"}], "+", 
                    RowBox[{"4", " ", "\[Delta]"}], "-", 
                    RowBox[{"5", " ", "h", " ", "\[Delta]"}]}], ")"}]}]}], 
                ")"}]}]}], ")"}], "2"]}]]}], ")"}]}]}], ",", 
     RowBox[{"pf", "\[Rule]", 
      RowBox[{
       FractionBox["1", 
        RowBox[{"4", " ", 
         RowBox[{"(", 
          RowBox[{
           RowBox[{"-", "1"}], "+", "c"}], ")"}], " ", "sf", " ", 
         RowBox[{"(", 
          RowBox[{
           RowBox[{"-", "1"}], "-", "\[Delta]", "+", 
           RowBox[{"h", " ", 
            RowBox[{"(", 
             RowBox[{"2", "+", "\[Delta]"}], ")"}]}]}], ")"}]}]], 
       RowBox[{"(", 
        RowBox[{
         RowBox[{
          RowBox[{"-", "4"}], " ", "c", " ", "sf"}], "+", 
         RowBox[{"8", " ", "c", " ", "h", " ", "sf"}], "+", "\[Delta]", "-", 
         RowBox[{"c", " ", "\[Delta]"}], "-", 
         RowBox[{"4", " ", "c", " ", "sf", " ", "\[Delta]"}], "-", 
         RowBox[{"h", " ", "sf", " ", "\[Delta]"}], "+", 
         RowBox[{"5", " ", "c", " ", "h", " ", "sf", " ", "\[Delta]"}], "+", 
         SqrtBox[
          RowBox[{
           RowBox[{
            RowBox[{"-", "8"}], " ", 
            RowBox[{"(", 
             RowBox[{
              RowBox[{"-", "1"}], "+", "c"}], ")"}], " ", "sf", " ", 
            RowBox[{"(", 
             RowBox[{
              RowBox[{"-", "1"}], "-", "\[Delta]", "+", 
              RowBox[{"h", " ", 
               RowBox[{"(", 
                RowBox[{"2", "+", "\[Delta]"}], ")"}]}]}], ")"}], " ", 
            RowBox[{"(", 
             RowBox[{"1", "+", 
              RowBox[{"h", " ", "sf"}], "+", 
              RowBox[{"c", " ", 
               RowBox[{"(", 
                RowBox[{
                 RowBox[{"-", "1"}], "-", 
                 RowBox[{"2", " ", "\[Delta]"}], "+", 
                 RowBox[{"h", " ", "sf", " ", 
                  RowBox[{"(", 
                   RowBox[{"3", "+", 
                    RowBox[{"2", " ", "\[Delta]"}]}], ")"}]}]}], ")"}]}]}], 
             ")"}]}], "+", 
           SuperscriptBox[
            RowBox[{"(", 
             RowBox[{
              RowBox[{
               RowBox[{"(", 
                RowBox[{
                 RowBox[{"-", "1"}], "+", 
                 RowBox[{"h", " ", "sf"}]}], ")"}], " ", "\[Delta]"}], "+", 
              RowBox[{"c", " ", 
               RowBox[{"(", 
                RowBox[{"\[Delta]", "+", 
                 RowBox[{"sf", " ", 
                  RowBox[{"(", 
                   RowBox[{"4", "-", 
                    RowBox[{"8", " ", "h"}], "+", 
                    RowBox[{"4", " ", "\[Delta]"}], "-", 
                    RowBox[{"5", " ", "h", " ", "\[Delta]"}]}], ")"}]}]}], 
                ")"}]}]}], ")"}], "2"]}]]}], ")"}]}]}], ",", 
     RowBox[{"F", "\[Rule]", 
      RowBox[{
       RowBox[{"(", 
        RowBox[{
         RowBox[{
          RowBox[{"-", "2"}], " ", "sf"}], "+", 
         RowBox[{"4", " ", "c", " ", "sf"}], "-", 
         RowBox[{"2", " ", 
          SuperscriptBox["c", "2"], " ", "sf"}], "+", 
         RowBox[{"4", " ", "h", " ", "sf"}], "-", 
         RowBox[{"8", " ", "c", " ", "h", " ", "sf"}], "+", 
         RowBox[{"4", " ", 
          SuperscriptBox["c", "2"], " ", "h", " ", "sf"}], "+", 
         RowBox[{"8", " ", 
          SuperscriptBox["sf", "2"]}], "+", 
         RowBox[{"4", " ", "c", " ", 
          SuperscriptBox["sf", "2"]}], "+", 
         RowBox[{"4", " ", 
          SuperscriptBox["c", "2"], " ", 
          SuperscriptBox["sf", "2"]}], "-", 
         RowBox[{"18", " ", "h", " ", 
          SuperscriptBox["sf", "2"]}], "-", 
         RowBox[{"36", " ", "c", " ", "h", " ", 
          SuperscriptBox["sf", "2"]}], "-", 
         RowBox[{"10", " ", 
          SuperscriptBox["c", "2"], " ", "h", " ", 
          SuperscriptBox["sf", "2"]}], "+", 
         RowBox[{"8", " ", 
          SuperscriptBox["h", "2"], " ", 
          SuperscriptBox["sf", "2"]}], "+", 
         RowBox[{"48", " ", "c", " ", 
          SuperscriptBox["h", "2"], " ", 
          SuperscriptBox["sf", "2"]}], "+", 
         RowBox[{"8", " ", 
          SuperscriptBox["c", "2"], " ", 
          SuperscriptBox["h", "2"], " ", 
          SuperscriptBox["sf", "2"]}], "+", 
         RowBox[{"8", " ", "h", " ", 
          SuperscriptBox["sf", "3"]}], "+", 
         RowBox[{"24", " ", "c", " ", "h", " ", 
          SuperscriptBox["sf", "3"]}], "-", 
         RowBox[{"14", " ", 
          SuperscriptBox["h", "2"], " ", 
          SuperscriptBox["sf", "3"]}], "-", 
         RowBox[{"36", " ", "c", " ", 
          SuperscriptBox["h", "2"], " ", 
          SuperscriptBox["sf", "3"]}], "-", 
         RowBox[{"14", " ", 
          SuperscriptBox["c", "2"], " ", 
          SuperscriptBox["h", "2"], " ", 
          SuperscriptBox["sf", "3"]}], "+", 
         RowBox[{"4", " ", 
          SuperscriptBox["h", "3"], " ", 
          SuperscriptBox["sf", "3"]}], "-", 
         RowBox[{"8", " ", "c", " ", 
          SuperscriptBox["h", "3"], " ", 
          SuperscriptBox["sf", "3"]}], "+", 
         RowBox[{"4", " ", 
          SuperscriptBox["c", "2"], " ", 
          SuperscriptBox["h", "3"], " ", 
          SuperscriptBox["sf", "3"]}], "+", 
         RowBox[{"4", " ", "c", " ", 
          SuperscriptBox["h", "2"], " ", 
          SuperscriptBox["sf", "4"]}], "+", 
         RowBox[{"12", " ", 
          SuperscriptBox["c", "2"], " ", 
          SuperscriptBox["h", "2"], " ", 
          SuperscriptBox["sf", "4"]}], "+", 
         RowBox[{"2", " ", 
          SuperscriptBox["h", "3"], " ", 
          SuperscriptBox["sf", "4"]}], "+", 
         RowBox[{"4", " ", "c", " ", 
          SuperscriptBox["h", "3"], " ", 
          SuperscriptBox["sf", "4"]}], "-", 
         RowBox[{"6", " ", 
          SuperscriptBox["c", "2"], " ", 
          SuperscriptBox["h", "3"], " ", 
          SuperscriptBox["sf", "4"]}], "-", 
         RowBox[{"9", " ", "sf", " ", "\[Delta]"}], "+", 
         RowBox[{"10", " ", "c", " ", "sf", " ", "\[Delta]"}], "-", 
         RowBox[{
          SuperscriptBox["c", "2"], " ", "sf", " ", "\[Delta]"}], "+", 
         RowBox[{"12", " ", "h", " ", "sf", " ", "\[Delta]"}], "-", 
         RowBox[{"8", " ", "c", " ", "h", " ", "sf", " ", "\[Delta]"}], "-", 
         RowBox[{"4", " ", 
          SuperscriptBox["c", "2"], " ", "h", " ", "sf", " ", "\[Delta]"}], 
         "+", 
         RowBox[{"8", " ", 
          SuperscriptBox["sf", "2"], " ", "\[Delta]"}], "-", 
         RowBox[{"4", " ", "c", " ", 
          SuperscriptBox["sf", "2"], " ", "\[Delta]"}], "+", 
         RowBox[{"4", " ", 
          SuperscriptBox["c", "2"], " ", 
          SuperscriptBox["sf", "2"], " ", "\[Delta]"}], "-", 
         RowBox[{"13", " ", "h", " ", 
          SuperscriptBox["sf", "2"], " ", "\[Delta]"}], "-", 
         RowBox[{"38", " ", "c", " ", "h", " ", 
          SuperscriptBox["sf", "2"], " ", "\[Delta]"}], "+", 
         RowBox[{"3", " ", 
          SuperscriptBox["c", "2"], " ", "h", " ", 
          SuperscriptBox["sf", "2"], " ", "\[Delta]"}], "+", 
         RowBox[{"48", " ", "c", " ", 
          SuperscriptBox["h", "2"], " ", 
          SuperscriptBox["sf", "2"], " ", "\[Delta]"}], "+", 
         RowBox[{"16", " ", 
          SuperscriptBox["c", "2"], " ", 
          SuperscriptBox["h", "2"], " ", 
          SuperscriptBox["sf", "2"], " ", "\[Delta]"}], "+", 
         RowBox[{"8", " ", "h", " ", 
          SuperscriptBox["sf", "3"], " ", "\[Delta]"}], "+", 
         RowBox[{"32", " ", "c", " ", "h", " ", 
          SuperscriptBox["sf", "3"], " ", "\[Delta]"}], "-", 
         RowBox[{"8", " ", 
          SuperscriptBox["c", "2"], " ", "h", " ", 
          SuperscriptBox["sf", "3"], " ", "\[Delta]"}], "-", 
         RowBox[{"11", " ", 
          SuperscriptBox["h", "2"], " ", 
          SuperscriptBox["sf", "3"], " ", "\[Delta]"}], "-", 
         RowBox[{"42", " ", "c", " ", 
          SuperscriptBox["h", "2"], " ", 
          SuperscriptBox["sf", "3"], " ", "\[Delta]"}], "-", 
         RowBox[{"27", " ", 
          SuperscriptBox["c", "2"], " ", 
          SuperscriptBox["h", "2"], " ", 
          SuperscriptBox["sf", "3"], " ", "\[Delta]"}], "+", 
         RowBox[{"4", " ", 
          SuperscriptBox["h", "3"], " ", 
          SuperscriptBox["sf", "3"], " ", "\[Delta]"}], "-", 
         RowBox[{"8", " ", "c", " ", 
          SuperscriptBox["h", "3"], " ", 
          SuperscriptBox["sf", "3"], " ", "\[Delta]"}], "+", 
         RowBox[{"4", " ", 
          SuperscriptBox["c", "2"], " ", 
          SuperscriptBox["h", "3"], " ", 
          SuperscriptBox["sf", "3"], " ", "\[Delta]"}], "+", 
         RowBox[{"4", " ", "c", " ", 
          SuperscriptBox["h", "2"], " ", 
          SuperscriptBox["sf", "4"], " ", "\[Delta]"}], "+", 
         RowBox[{"20", " ", 
          SuperscriptBox["c", "2"], " ", 
          SuperscriptBox["h", "2"], " ", 
          SuperscriptBox["sf", "4"], " ", "\[Delta]"}], "+", 
         RowBox[{
          SuperscriptBox["h", "3"], " ", 
          SuperscriptBox["sf", "4"], " ", "\[Delta]"}], "+", 
         RowBox[{"6", " ", "c", " ", 
          SuperscriptBox["h", "3"], " ", 
          SuperscriptBox["sf", "4"], " ", "\[Delta]"}], "-", 
         RowBox[{"7", " ", 
          SuperscriptBox["c", "2"], " ", 
          SuperscriptBox["h", "3"], " ", 
          SuperscriptBox["sf", "4"], " ", "\[Delta]"}], "+", 
         SuperscriptBox["\[Delta]", "2"], "-", 
         RowBox[{"2", " ", "c", " ", 
          SuperscriptBox["\[Delta]", "2"]}], "+", 
         RowBox[{
          SuperscriptBox["c", "2"], " ", 
          SuperscriptBox["\[Delta]", "2"]}], "-", 
         RowBox[{"2", " ", "sf", " ", 
          SuperscriptBox["\[Delta]", "2"]}], "+", 
         RowBox[{"10", " ", "c", " ", "sf", " ", 
          SuperscriptBox["\[Delta]", "2"]}], "-", 
         RowBox[{"h", " ", "sf", " ", 
          SuperscriptBox["\[Delta]", "2"]}], "-", 
         RowBox[{"6", " ", "c", " ", "h", " ", "sf", " ", 
          SuperscriptBox["\[Delta]", "2"]}], "-", 
         RowBox[{"9", " ", 
          SuperscriptBox["c", "2"], " ", "h", " ", "sf", " ", 
          SuperscriptBox["\[Delta]", "2"]}], "-", 
         RowBox[{"8", " ", "c", " ", 
          SuperscriptBox["sf", "2"], " ", 
          SuperscriptBox["\[Delta]", "2"]}], "+", 
         RowBox[{"4", " ", "h", " ", 
          SuperscriptBox["sf", "2"], " ", 
          SuperscriptBox["\[Delta]", "2"]}], "-", 
         RowBox[{"2", " ", "c", " ", "h", " ", 
          SuperscriptBox["sf", "2"], " ", 
          SuperscriptBox["\[Delta]", "2"]}], "+", 
         RowBox[{"14", " ", 
          SuperscriptBox["c", "2"], " ", "h", " ", 
          SuperscriptBox["sf", "2"], " ", 
          SuperscriptBox["\[Delta]", "2"]}], "-", 
         RowBox[{
          SuperscriptBox["h", "2"], " ", 
          SuperscriptBox["sf", "2"], " ", 
          SuperscriptBox["\[Delta]", "2"]}], "+", 
         RowBox[{"10", " ", "c", " ", 
          SuperscriptBox["h", "2"], " ", 
          SuperscriptBox["sf", "2"], " ", 
          SuperscriptBox["\[Delta]", "2"]}], "+", 
         RowBox[{"7", " ", 
          SuperscriptBox["c", "2"], " ", 
          SuperscriptBox["h", "2"], " ", 
          SuperscriptBox["sf", "2"], " ", 
          SuperscriptBox["\[Delta]", "2"]}], "+", 
         RowBox[{"8", " ", "c", " ", "h", " ", 
          SuperscriptBox["sf", "3"], " ", 
          SuperscriptBox["\[Delta]", "2"]}], "-", 
         RowBox[{"8", " ", 
          SuperscriptBox["c", "2"], " ", "h", " ", 
          SuperscriptBox["sf", "3"], " ", 
          SuperscriptBox["\[Delta]", "2"]}], "-", 
         RowBox[{"2", " ", 
          SuperscriptBox["h", "2"], " ", 
          SuperscriptBox["sf", "3"], " ", 
          SuperscriptBox["\[Delta]", "2"]}], "-", 
         RowBox[{"10", " ", "c", " ", 
          SuperscriptBox["h", "2"], " ", 
          SuperscriptBox["sf", "3"], " ", 
          SuperscriptBox["\[Delta]", "2"]}], "-", 
         RowBox[{"12", " ", 
          SuperscriptBox["c", "2"], " ", 
          SuperscriptBox["h", "2"], " ", 
          SuperscriptBox["sf", "3"], " ", 
          SuperscriptBox["\[Delta]", "2"]}], "+", 
         RowBox[{
          SuperscriptBox["h", "3"], " ", 
          SuperscriptBox["sf", "3"], " ", 
          SuperscriptBox["\[Delta]", "2"]}], "-", 
         RowBox[{"2", " ", "c", " ", 
          SuperscriptBox["h", "3"], " ", 
          SuperscriptBox["sf", "3"], " ", 
          SuperscriptBox["\[Delta]", "2"]}], "+", 
         RowBox[{
          SuperscriptBox["c", "2"], " ", 
          SuperscriptBox["h", "3"], " ", 
          SuperscriptBox["sf", "3"], " ", 
          SuperscriptBox["\[Delta]", "2"]}], "+", 
         RowBox[{"8", " ", 
          SuperscriptBox["c", "2"], " ", 
          SuperscriptBox["h", "2"], " ", 
          SuperscriptBox["sf", "4"], " ", 
          SuperscriptBox["\[Delta]", "2"]}], "+", 
         RowBox[{"2", " ", "c", " ", 
          SuperscriptBox["h", "3"], " ", 
          SuperscriptBox["sf", "4"], " ", 
          SuperscriptBox["\[Delta]", "2"]}], "-", 
         RowBox[{"2", " ", 
          SuperscriptBox["c", "2"], " ", 
          SuperscriptBox["h", "3"], " ", 
          SuperscriptBox["sf", "4"], " ", 
          SuperscriptBox["\[Delta]", "2"]}], "-", 
         RowBox[{"3", " ", "sf", " ", 
          SqrtBox[
           RowBox[{
            RowBox[{
             RowBox[{"-", "8"}], " ", 
             RowBox[{"(", 
              RowBox[{
               RowBox[{"-", "1"}], "+", "c"}], ")"}], " ", "sf", " ", 
             RowBox[{"(", 
              RowBox[{
               RowBox[{"-", "1"}], "-", "\[Delta]", "+", 
               RowBox[{"h", " ", 
                RowBox[{"(", 
                 RowBox[{"2", "+", "\[Delta]"}], ")"}]}]}], ")"}], " ", 
             RowBox[{"(", 
              RowBox[{"1", "+", 
               RowBox[{"h", " ", "sf"}], "+", 
               RowBox[{"c", " ", 
                RowBox[{"(", 
                 RowBox[{
                  RowBox[{"-", "1"}], "-", 
                  RowBox[{"2", " ", "\[Delta]"}], "+", 
                  RowBox[{"h", " ", "sf", " ", 
                   RowBox[{"(", 
                    RowBox[{"3", "+", 
                    RowBox[{"2", " ", "\[Delta]"}]}], ")"}]}]}], ")"}]}]}], 
              ")"}]}], "+", 
            SuperscriptBox[
             RowBox[{"(", 
              RowBox[{
               RowBox[{
                RowBox[{"(", 
                 RowBox[{
                  RowBox[{"-", "1"}], "+", 
                  RowBox[{"h", " ", "sf"}]}], ")"}], " ", "\[Delta]"}], "+", 
               RowBox[{"c", " ", 
                RowBox[{"(", 
                 RowBox[{"\[Delta]", "+", 
                  RowBox[{"sf", " ", 
                   RowBox[{"(", 
                    RowBox[{"4", "-", 
                    RowBox[{"8", " ", "h"}], "+", 
                    RowBox[{"4", " ", "\[Delta]"}], "-", 
                    RowBox[{"5", " ", "h", " ", "\[Delta]"}]}], ")"}]}]}], 
                 ")"}]}]}], ")"}], "2"]}]]}], "-", 
         RowBox[{"c", " ", "sf", " ", 
          SqrtBox[
           RowBox[{
            RowBox[{
             RowBox[{"-", "8"}], " ", 
             RowBox[{"(", 
              RowBox[{
               RowBox[{"-", "1"}], "+", "c"}], ")"}], " ", "sf", " ", 
             RowBox[{"(", 
              RowBox[{
               RowBox[{"-", "1"}], "-", "\[Delta]", "+", 
               RowBox[{"h", " ", 
                RowBox[{"(", 
                 RowBox[{"2", "+", "\[Delta]"}], ")"}]}]}], ")"}], " ", 
             RowBox[{"(", 
              RowBox[{"1", "+", 
               RowBox[{"h", " ", "sf"}], "+", 
               RowBox[{"c", " ", 
                RowBox[{"(", 
                 RowBox[{
                  RowBox[{"-", "1"}], "-", 
                  RowBox[{"2", " ", "\[Delta]"}], "+", 
                  RowBox[{"h", " ", "sf", " ", 
                   RowBox[{"(", 
                    RowBox[{"3", "+", 
                    RowBox[{"2", " ", "\[Delta]"}]}], ")"}]}]}], ")"}]}]}], 
              ")"}]}], "+", 
            SuperscriptBox[
             RowBox[{"(", 
              RowBox[{
               RowBox[{
                RowBox[{"(", 
                 RowBox[{
                  RowBox[{"-", "1"}], "+", 
                  RowBox[{"h", " ", "sf"}]}], ")"}], " ", "\[Delta]"}], "+", 
               RowBox[{"c", " ", 
                RowBox[{"(", 
                 RowBox[{"\[Delta]", "+", 
                  RowBox[{"sf", " ", 
                   RowBox[{"(", 
                    RowBox[{"4", "-", 
                    RowBox[{"8", " ", "h"}], "+", 
                    RowBox[{"4", " ", "\[Delta]"}], "-", 
                    RowBox[{"5", " ", "h", " ", "\[Delta]"}]}], ")"}]}]}], 
                 ")"}]}]}], ")"}], "2"]}]]}], "+", 
         RowBox[{"4", " ", "h", " ", "sf", " ", 
          SqrtBox[
           RowBox[{
            RowBox[{
             RowBox[{"-", "8"}], " ", 
             RowBox[{"(", 
              RowBox[{
               RowBox[{"-", "1"}], "+", "c"}], ")"}], " ", "sf", " ", 
             RowBox[{"(", 
              RowBox[{
               RowBox[{"-", "1"}], "-", "\[Delta]", "+", 
               RowBox[{"h", " ", 
                RowBox[{"(", 
                 RowBox[{"2", "+", "\[Delta]"}], ")"}]}]}], ")"}], " ", 
             RowBox[{"(", 
              RowBox[{"1", "+", 
               RowBox[{"h", " ", "sf"}], "+", 
               RowBox[{"c", " ", 
                RowBox[{"(", 
                 RowBox[{
                  RowBox[{"-", "1"}], "-", 
                  RowBox[{"2", " ", "\[Delta]"}], "+", 
                  RowBox[{"h", " ", "sf", " ", 
                   RowBox[{"(", 
                    RowBox[{"3", "+", 
                    RowBox[{"2", " ", "\[Delta]"}]}], ")"}]}]}], ")"}]}]}], 
              ")"}]}], "+", 
            SuperscriptBox[
             RowBox[{"(", 
              RowBox[{
               RowBox[{
                RowBox[{"(", 
                 RowBox[{
                  RowBox[{"-", "1"}], "+", 
                  RowBox[{"h", " ", "sf"}]}], ")"}], " ", "\[Delta]"}], "+", 
               RowBox[{"c", " ", 
                RowBox[{"(", 
                 RowBox[{"\[Delta]", "+", 
                  RowBox[{"sf", " ", 
                   RowBox[{"(", 
                    RowBox[{"4", "-", 
                    RowBox[{"8", " ", "h"}], "+", 
                    RowBox[{"4", " ", "\[Delta]"}], "-", 
                    RowBox[{"5", " ", "h", " ", "\[Delta]"}]}], ")"}]}]}], 
                 ")"}]}]}], ")"}], "2"]}]]}], "+", 
         RowBox[{"4", " ", "c", " ", "h", " ", "sf", " ", 
          SqrtBox[
           RowBox[{
            RowBox[{
             RowBox[{"-", "8"}], " ", 
             RowBox[{"(", 
              RowBox[{
               RowBox[{"-", "1"}], "+", "c"}], ")"}], " ", "sf", " ", 
             RowBox[{"(", 
              RowBox[{
               RowBox[{"-", "1"}], "-", "\[Delta]", "+", 
               RowBox[{"h", " ", 
                RowBox[{"(", 
                 RowBox[{"2", "+", "\[Delta]"}], ")"}]}]}], ")"}], " ", 
             RowBox[{"(", 
              RowBox[{"1", "+", 
               RowBox[{"h", " ", "sf"}], "+", 
               RowBox[{"c", " ", 
                RowBox[{"(", 
                 RowBox[{
                  RowBox[{"-", "1"}], "-", 
                  RowBox[{"2", " ", "\[Delta]"}], "+", 
                  RowBox[{"h", " ", "sf", " ", 
                   RowBox[{"(", 
                    RowBox[{"3", "+", 
                    RowBox[{"2", " ", "\[Delta]"}]}], ")"}]}]}], ")"}]}]}], 
              ")"}]}], "+", 
            SuperscriptBox[
             RowBox[{"(", 
              RowBox[{
               RowBox[{
                RowBox[{"(", 
                 RowBox[{
                  RowBox[{"-", "1"}], "+", 
                  RowBox[{"h", " ", "sf"}]}], ")"}], " ", "\[Delta]"}], "+", 
               RowBox[{"c", " ", 
                RowBox[{"(", 
                 RowBox[{"\[Delta]", "+", 
                  RowBox[{"sf", " ", 
                   RowBox[{"(", 
                    RowBox[{"4", "-", 
                    RowBox[{"8", " ", "h"}], "+", 
                    RowBox[{"4", " ", "\[Delta]"}], "-", 
                    RowBox[{"5", " ", "h", " ", "\[Delta]"}]}], ")"}]}]}], 
                 ")"}]}]}], ")"}], "2"]}]]}], "+", 
         RowBox[{"2", " ", "h", " ", 
          SuperscriptBox["sf", "2"], " ", 
          SqrtBox[
           RowBox[{
            RowBox[{
             RowBox[{"-", "8"}], " ", 
             RowBox[{"(", 
              RowBox[{
               RowBox[{"-", "1"}], "+", "c"}], ")"}], " ", "sf", " ", 
             RowBox[{"(", 
              RowBox[{
               RowBox[{"-", "1"}], "-", "\[Delta]", "+", 
               RowBox[{"h", " ", 
                RowBox[{"(", 
                 RowBox[{"2", "+", "\[Delta]"}], ")"}]}]}], ")"}], " ", 
             RowBox[{"(", 
              RowBox[{"1", "+", 
               RowBox[{"h", " ", "sf"}], "+", 
               RowBox[{"c", " ", 
                RowBox[{"(", 
                 RowBox[{
                  RowBox[{"-", "1"}], "-", 
                  RowBox[{"2", " ", "\[Delta]"}], "+", 
                  RowBox[{"h", " ", "sf", " ", 
                   RowBox[{"(", 
                    RowBox[{"3", "+", 
                    RowBox[{"2", " ", "\[Delta]"}]}], ")"}]}]}], ")"}]}]}], 
              ")"}]}], "+", 
            SuperscriptBox[
             RowBox[{"(", 
              RowBox[{
               RowBox[{
                RowBox[{"(", 
                 RowBox[{
                  RowBox[{"-", "1"}], "+", 
                  RowBox[{"h", " ", "sf"}]}], ")"}], " ", "\[Delta]"}], "+", 
               RowBox[{"c", " ", 
                RowBox[{"(", 
                 RowBox[{"\[Delta]", "+", 
                  RowBox[{"sf", " ", 
                   RowBox[{"(", 
                    RowBox[{"4", "-", 
                    RowBox[{"8", " ", "h"}], "+", 
                    RowBox[{"4", " ", "\[Delta]"}], "-", 
                    RowBox[{"5", " ", "h", " ", "\[Delta]"}]}], ")"}]}]}], 
                 ")"}]}]}], ")"}], "2"]}]]}], "-", 
         RowBox[{"2", " ", "c", " ", "h", " ", 
          SuperscriptBox["sf", "2"], " ", 
          SqrtBox[
           RowBox[{
            RowBox[{
             RowBox[{"-", "8"}], " ", 
             RowBox[{"(", 
              RowBox[{
               RowBox[{"-", "1"}], "+", "c"}], ")"}], " ", "sf", " ", 
             RowBox[{"(", 
              RowBox[{
               RowBox[{"-", "1"}], "-", "\[Delta]", "+", 
               RowBox[{"h", " ", 
                RowBox[{"(", 
                 RowBox[{"2", "+", "\[Delta]"}], ")"}]}]}], ")"}], " ", 
             RowBox[{"(", 
              RowBox[{"1", "+", 
               RowBox[{"h", " ", "sf"}], "+", 
               RowBox[{"c", " ", 
                RowBox[{"(", 
                 RowBox[{
                  RowBox[{"-", "1"}], "-", 
                  RowBox[{"2", " ", "\[Delta]"}], "+", 
                  RowBox[{"h", " ", "sf", " ", 
                   RowBox[{"(", 
                    RowBox[{"3", "+", 
                    RowBox[{"2", " ", "\[Delta]"}]}], ")"}]}]}], ")"}]}]}], 
              ")"}]}], "+", 
            SuperscriptBox[
             RowBox[{"(", 
              RowBox[{
               RowBox[{
                RowBox[{"(", 
                 RowBox[{
                  RowBox[{"-", "1"}], "+", 
                  RowBox[{"h", " ", "sf"}]}], ")"}], " ", "\[Delta]"}], "+", 
               RowBox[{"c", " ", 
                RowBox[{"(", 
                 RowBox[{"\[Delta]", "+", 
                  RowBox[{"sf", " ", 
                   RowBox[{"(", 
                    RowBox[{"4", "-", 
                    RowBox[{"8", " ", "h"}], "+", 
                    RowBox[{"4", " ", "\[Delta]"}], "-", 
                    RowBox[{"5", " ", "h", " ", "\[Delta]"}]}], ")"}]}]}], 
                 ")"}]}]}], ")"}], "2"]}]]}], "-", 
         RowBox[{"4", " ", 
          SuperscriptBox["h", "2"], " ", 
          SuperscriptBox["sf", "2"], " ", 
          SqrtBox[
           RowBox[{
            RowBox[{
             RowBox[{"-", "8"}], " ", 
             RowBox[{"(", 
              RowBox[{
               RowBox[{"-", "1"}], "+", "c"}], ")"}], " ", "sf", " ", 
             RowBox[{"(", 
              RowBox[{
               RowBox[{"-", "1"}], "-", "\[Delta]", "+", 
               RowBox[{"h", " ", 
                RowBox[{"(", 
                 RowBox[{"2", "+", "\[Delta]"}], ")"}]}]}], ")"}], " ", 
             RowBox[{"(", 
              RowBox[{"1", "+", 
               RowBox[{"h", " ", "sf"}], "+", 
               RowBox[{"c", " ", 
                RowBox[{"(", 
                 RowBox[{
                  RowBox[{"-", "1"}], "-", 
                  RowBox[{"2", " ", "\[Delta]"}], "+", 
                  RowBox[{"h", " ", "sf", " ", 
                   RowBox[{"(", 
                    RowBox[{"3", "+", 
                    RowBox[{"2", " ", "\[Delta]"}]}], ")"}]}]}], ")"}]}]}], 
              ")"}]}], "+", 
            SuperscriptBox[
             RowBox[{"(", 
              RowBox[{
               RowBox[{
                RowBox[{"(", 
                 RowBox[{
                  RowBox[{"-", "1"}], "+", 
                  RowBox[{"h", " ", "sf"}]}], ")"}], " ", "\[Delta]"}], "+", 
               RowBox[{"c", " ", 
                RowBox[{"(", 
                 RowBox[{"\[Delta]", "+", 
                  RowBox[{"sf", " ", 
                   RowBox[{"(", 
                    RowBox[{"4", "-", 
                    RowBox[{"8", " ", "h"}], "+", 
                    RowBox[{"4", " ", "\[Delta]"}], "-", 
                    RowBox[{"5", " ", "h", " ", "\[Delta]"}]}], ")"}]}]}], 
                 ")"}]}]}], ")"}], "2"]}]]}], "-", 
         RowBox[{"4", " ", "c", " ", 
          SuperscriptBox["h", "2"], " ", 
          SuperscriptBox["sf", "2"], " ", 
          SqrtBox[
           RowBox[{
            RowBox[{
             RowBox[{"-", "8"}], " ", 
             RowBox[{"(", 
              RowBox[{
               RowBox[{"-", "1"}], "+", "c"}], ")"}], " ", "sf", " ", 
             RowBox[{"(", 
              RowBox[{
               RowBox[{"-", "1"}], "-", "\[Delta]", "+", 
               RowBox[{"h", " ", 
                RowBox[{"(", 
                 RowBox[{"2", "+", "\[Delta]"}], ")"}]}]}], ")"}], " ", 
             RowBox[{"(", 
              RowBox[{"1", "+", 
               RowBox[{"h", " ", "sf"}], "+", 
               RowBox[{"c", " ", 
                RowBox[{"(", 
                 RowBox[{
                  RowBox[{"-", "1"}], "-", 
                  RowBox[{"2", " ", "\[Delta]"}], "+", 
                  RowBox[{"h", " ", "sf", " ", 
                   RowBox[{"(", 
                    RowBox[{"3", "+", 
                    RowBox[{"2", " ", "\[Delta]"}]}], ")"}]}]}], ")"}]}]}], 
              ")"}]}], "+", 
            SuperscriptBox[
             RowBox[{"(", 
              RowBox[{
               RowBox[{
                RowBox[{"(", 
                 RowBox[{
                  RowBox[{"-", "1"}], "+", 
                  RowBox[{"h", " ", "sf"}]}], ")"}], " ", "\[Delta]"}], "+", 
               RowBox[{"c", " ", 
                RowBox[{"(", 
                 RowBox[{"\[Delta]", "+", 
                  RowBox[{"sf", " ", 
                   RowBox[{"(", 
                    RowBox[{"4", "-", 
                    RowBox[{"8", " ", "h"}], "+", 
                    RowBox[{"4", " ", "\[Delta]"}], "-", 
                    RowBox[{"5", " ", "h", " ", "\[Delta]"}]}], ")"}]}]}], 
                 ")"}]}]}], ")"}], "2"]}]]}], "+", 
         RowBox[{
          SuperscriptBox["h", "2"], " ", 
          SuperscriptBox["sf", "3"], " ", 
          SqrtBox[
           RowBox[{
            RowBox[{
             RowBox[{"-", "8"}], " ", 
             RowBox[{"(", 
              RowBox[{
               RowBox[{"-", "1"}], "+", "c"}], ")"}], " ", "sf", " ", 
             RowBox[{"(", 
              RowBox[{
               RowBox[{"-", "1"}], "-", "\[Delta]", "+", 
               RowBox[{"h", " ", 
                RowBox[{"(", 
                 RowBox[{"2", "+", "\[Delta]"}], ")"}]}]}], ")"}], " ", 
             RowBox[{"(", 
              RowBox[{"1", "+", 
               RowBox[{"h", " ", "sf"}], "+", 
               RowBox[{"c", " ", 
                RowBox[{"(", 
                 RowBox[{
                  RowBox[{"-", "1"}], "-", 
                  RowBox[{"2", " ", "\[Delta]"}], "+", 
                  RowBox[{"h", " ", "sf", " ", 
                   RowBox[{"(", 
                    RowBox[{"3", "+", 
                    RowBox[{"2", " ", "\[Delta]"}]}], ")"}]}]}], ")"}]}]}], 
              ")"}]}], "+", 
            SuperscriptBox[
             RowBox[{"(", 
              RowBox[{
               RowBox[{
                RowBox[{"(", 
                 RowBox[{
                  RowBox[{"-", "1"}], "+", 
                  RowBox[{"h", " ", "sf"}]}], ")"}], " ", "\[Delta]"}], "+", 
               RowBox[{"c", " ", 
                RowBox[{"(", 
                 RowBox[{"\[Delta]", "+", 
                  RowBox[{"sf", " ", 
                   RowBox[{"(", 
                    RowBox[{"4", "-", 
                    RowBox[{"8", " ", "h"}], "+", 
                    RowBox[{"4", " ", "\[Delta]"}], "-", 
                    RowBox[{"5", " ", "h", " ", "\[Delta]"}]}], ")"}]}]}], 
                 ")"}]}]}], ")"}], "2"]}]]}], "+", 
         RowBox[{"3", " ", "c", " ", 
          SuperscriptBox["h", "2"], " ", 
          SuperscriptBox["sf", "3"], " ", 
          SqrtBox[
           RowBox[{
            RowBox[{
             RowBox[{"-", "8"}], " ", 
             RowBox[{"(", 
              RowBox[{
               RowBox[{"-", "1"}], "+", "c"}], ")"}], " ", "sf", " ", 
             RowBox[{"(", 
              RowBox[{
               RowBox[{"-", "1"}], "-", "\[Delta]", "+", 
               RowBox[{"h", " ", 
                RowBox[{"(", 
                 RowBox[{"2", "+", "\[Delta]"}], ")"}]}]}], ")"}], " ", 
             RowBox[{"(", 
              RowBox[{"1", "+", 
               RowBox[{"h", " ", "sf"}], "+", 
               RowBox[{"c", " ", 
                RowBox[{"(", 
                 RowBox[{
                  RowBox[{"-", "1"}], "-", 
                  RowBox[{"2", " ", "\[Delta]"}], "+", 
                  RowBox[{"h", " ", "sf", " ", 
                   RowBox[{"(", 
                    RowBox[{"3", "+", 
                    RowBox[{"2", " ", "\[Delta]"}]}], ")"}]}]}], ")"}]}]}], 
              ")"}]}], "+", 
            SuperscriptBox[
             RowBox[{"(", 
              RowBox[{
               RowBox[{
                RowBox[{"(", 
                 RowBox[{
                  RowBox[{"-", "1"}], "+", 
                  RowBox[{"h", " ", "sf"}]}], ")"}], " ", "\[Delta]"}], "+", 
               RowBox[{"c", " ", 
                RowBox[{"(", 
                 RowBox[{"\[Delta]", "+", 
                  RowBox[{"sf", " ", 
                   RowBox[{"(", 
                    RowBox[{"4", "-", 
                    RowBox[{"8", " ", "h"}], "+", 
                    RowBox[{"4", " ", "\[Delta]"}], "-", 
                    RowBox[{"5", " ", "h", " ", "\[Delta]"}]}], ")"}]}]}], 
                 ")"}]}]}], ")"}], "2"]}]]}], "+", 
         RowBox[{"\[Delta]", " ", 
          SqrtBox[
           RowBox[{
            RowBox[{
             RowBox[{"-", "8"}], " ", 
             RowBox[{"(", 
              RowBox[{
               RowBox[{"-", "1"}], "+", "c"}], ")"}], " ", "sf", " ", 
             RowBox[{"(", 
              RowBox[{
               RowBox[{"-", "1"}], "-", "\[Delta]", "+", 
               RowBox[{"h", " ", 
                RowBox[{"(", 
                 RowBox[{"2", "+", "\[Delta]"}], ")"}]}]}], ")"}], " ", 
             RowBox[{"(", 
              RowBox[{"1", "+", 
               RowBox[{"h", " ", "sf"}], "+", 
               RowBox[{"c", " ", 
                RowBox[{"(", 
                 RowBox[{
                  RowBox[{"-", "1"}], "-", 
                  RowBox[{"2", " ", "\[Delta]"}], "+", 
                  RowBox[{"h", " ", "sf", " ", 
                   RowBox[{"(", 
                    RowBox[{"3", "+", 
                    RowBox[{"2", " ", "\[Delta]"}]}], ")"}]}]}], ")"}]}]}], 
              ")"}]}], "+", 
            SuperscriptBox[
             RowBox[{"(", 
              RowBox[{
               RowBox[{
                RowBox[{"(", 
                 RowBox[{
                  RowBox[{"-", "1"}], "+", 
                  RowBox[{"h", " ", "sf"}]}], ")"}], " ", "\[Delta]"}], "+", 
               RowBox[{"c", " ", 
                RowBox[{"(", 
                 RowBox[{"\[Delta]", "+", 
                  RowBox[{"sf", " ", 
                   RowBox[{"(", 
                    RowBox[{"4", "-", 
                    RowBox[{"8", " ", "h"}], "+", 
                    RowBox[{"4", " ", "\[Delta]"}], "-", 
                    RowBox[{"5", " ", "h", " ", "\[Delta]"}]}], ")"}]}]}], 
                 ")"}]}]}], ")"}], "2"]}]]}], "-", 
         RowBox[{"c", " ", "\[Delta]", " ", 
          SqrtBox[
           RowBox[{
            RowBox[{
             RowBox[{"-", "8"}], " ", 
             RowBox[{"(", 
              RowBox[{
               RowBox[{"-", "1"}], "+", "c"}], ")"}], " ", "sf", " ", 
             RowBox[{"(", 
              RowBox[{
               RowBox[{"-", "1"}], "-", "\[Delta]", "+", 
               RowBox[{"h", " ", 
                RowBox[{"(", 
                 RowBox[{"2", "+", "\[Delta]"}], ")"}]}]}], ")"}], " ", 
             RowBox[{"(", 
              RowBox[{"1", "+", 
               RowBox[{"h", " ", "sf"}], "+", 
               RowBox[{"c", " ", 
                RowBox[{"(", 
                 RowBox[{
                  RowBox[{"-", "1"}], "-", 
                  RowBox[{"2", " ", "\[Delta]"}], "+", 
                  RowBox[{"h", " ", "sf", " ", 
                   RowBox[{"(", 
                    RowBox[{"3", "+", 
                    RowBox[{"2", " ", "\[Delta]"}]}], ")"}]}]}], ")"}]}]}], 
              ")"}]}], "+", 
            SuperscriptBox[
             RowBox[{"(", 
              RowBox[{
               RowBox[{
                RowBox[{"(", 
                 RowBox[{
                  RowBox[{"-", "1"}], "+", 
                  RowBox[{"h", " ", "sf"}]}], ")"}], " ", "\[Delta]"}], "+", 
               RowBox[{"c", " ", 
                RowBox[{"(", 
                 RowBox[{"\[Delta]", "+", 
                  RowBox[{"sf", " ", 
                   RowBox[{"(", 
                    RowBox[{"4", "-", 
                    RowBox[{"8", " ", "h"}], "+", 
                    RowBox[{"4", " ", "\[Delta]"}], "-", 
                    RowBox[{"5", " ", "h", " ", "\[Delta]"}]}], ")"}]}]}], 
                 ")"}]}]}], ")"}], "2"]}]]}], "-", 
         RowBox[{"2", " ", "sf", " ", "\[Delta]", " ", 
          SqrtBox[
           RowBox[{
            RowBox[{
             RowBox[{"-", "8"}], " ", 
             RowBox[{"(", 
              RowBox[{
               RowBox[{"-", "1"}], "+", "c"}], ")"}], " ", "sf", " ", 
             RowBox[{"(", 
              RowBox[{
               RowBox[{"-", "1"}], "-", "\[Delta]", "+", 
               RowBox[{"h", " ", 
                RowBox[{"(", 
                 RowBox[{"2", "+", "\[Delta]"}], ")"}]}]}], ")"}], " ", 
             RowBox[{"(", 
              RowBox[{"1", "+", 
               RowBox[{"h", " ", "sf"}], "+", 
               RowBox[{"c", " ", 
                RowBox[{"(", 
                 RowBox[{
                  RowBox[{"-", "1"}], "-", 
                  RowBox[{"2", " ", "\[Delta]"}], "+", 
                  RowBox[{"h", " ", "sf", " ", 
                   RowBox[{"(", 
                    RowBox[{"3", "+", 
                    RowBox[{"2", " ", "\[Delta]"}]}], ")"}]}]}], ")"}]}]}], 
              ")"}]}], "+", 
            SuperscriptBox[
             RowBox[{"(", 
              RowBox[{
               RowBox[{
                RowBox[{"(", 
                 RowBox[{
                  RowBox[{"-", "1"}], "+", 
                  RowBox[{"h", " ", "sf"}]}], ")"}], " ", "\[Delta]"}], "+", 
               RowBox[{"c", " ", 
                RowBox[{"(", 
                 RowBox[{"\[Delta]", "+", 
                  RowBox[{"sf", " ", 
                   RowBox[{"(", 
                    RowBox[{"4", "-", 
                    RowBox[{"8", " ", "h"}], "+", 
                    RowBox[{"4", " ", "\[Delta]"}], "-", 
                    RowBox[{"5", " ", "h", " ", "\[Delta]"}]}], ")"}]}]}], 
                 ")"}]}]}], ")"}], "2"]}]]}], "+", 
         RowBox[{"4", " ", "c", " ", "h", " ", "sf", " ", "\[Delta]", " ", 
          SqrtBox[
           RowBox[{
            RowBox[{
             RowBox[{"-", "8"}], " ", 
             RowBox[{"(", 
              RowBox[{
               RowBox[{"-", "1"}], "+", "c"}], ")"}], " ", "sf", " ", 
             RowBox[{"(", 
              RowBox[{
               RowBox[{"-", "1"}], "-", "\[Delta]", "+", 
               RowBox[{"h", " ", 
                RowBox[{"(", 
                 RowBox[{"2", "+", "\[Delta]"}], ")"}]}]}], ")"}], " ", 
             RowBox[{"(", 
              RowBox[{"1", "+", 
               RowBox[{"h", " ", "sf"}], "+", 
               RowBox[{"c", " ", 
                RowBox[{"(", 
                 RowBox[{
                  RowBox[{"-", "1"}], "-", 
                  RowBox[{"2", " ", "\[Delta]"}], "+", 
                  RowBox[{"h", " ", "sf", " ", 
                   RowBox[{"(", 
                    RowBox[{"3", "+", 
                    RowBox[{"2", " ", "\[Delta]"}]}], ")"}]}]}], ")"}]}]}], 
              ")"}]}], "+", 
            SuperscriptBox[
             RowBox[{"(", 
              RowBox[{
               RowBox[{
                RowBox[{"(", 
                 RowBox[{
                  RowBox[{"-", "1"}], "+", 
                  RowBox[{"h", " ", "sf"}]}], ")"}], " ", "\[Delta]"}], "+", 
               RowBox[{"c", " ", 
                RowBox[{"(", 
                 RowBox[{"\[Delta]", "+", 
                  RowBox[{"sf", " ", 
                   RowBox[{"(", 
                    RowBox[{"4", "-", 
                    RowBox[{"8", " ", "h"}], "+", 
                    RowBox[{"4", " ", "\[Delta]"}], "-", 
                    RowBox[{"5", " ", "h", " ", "\[Delta]"}]}], ")"}]}]}], 
                 ")"}]}]}], ")"}], "2"]}]]}], "+", 
         RowBox[{"2", " ", "h", " ", 
          SuperscriptBox["sf", "2"], " ", "\[Delta]", " ", 
          SqrtBox[
           RowBox[{
            RowBox[{
             RowBox[{"-", "8"}], " ", 
             RowBox[{"(", 
              RowBox[{
               RowBox[{"-", "1"}], "+", "c"}], ")"}], " ", "sf", " ", 
             RowBox[{"(", 
              RowBox[{
               RowBox[{"-", "1"}], "-", "\[Delta]", "+", 
               RowBox[{"h", " ", 
                RowBox[{"(", 
                 RowBox[{"2", "+", "\[Delta]"}], ")"}]}]}], ")"}], " ", 
             RowBox[{"(", 
              RowBox[{"1", "+", 
               RowBox[{"h", " ", "sf"}], "+", 
               RowBox[{"c", " ", 
                RowBox[{"(", 
                 RowBox[{
                  RowBox[{"-", "1"}], "-", 
                  RowBox[{"2", " ", "\[Delta]"}], "+", 
                  RowBox[{"h", " ", "sf", " ", 
                   RowBox[{"(", 
                    RowBox[{"3", "+", 
                    RowBox[{"2", " ", "\[Delta]"}]}], ")"}]}]}], ")"}]}]}], 
              ")"}]}], "+", 
            SuperscriptBox[
             RowBox[{"(", 
              RowBox[{
               RowBox[{
                RowBox[{"(", 
                 RowBox[{
                  RowBox[{"-", "1"}], "+", 
                  RowBox[{"h", " ", "sf"}]}], ")"}], " ", "\[Delta]"}], "+", 
               RowBox[{"c", " ", 
                RowBox[{"(", 
                 RowBox[{"\[Delta]", "+", 
                  RowBox[{"sf", " ", 
                   RowBox[{"(", 
                    RowBox[{"4", "-", 
                    RowBox[{"8", " ", "h"}], "+", 
                    RowBox[{"4", " ", "\[Delta]"}], "-", 
                    RowBox[{"5", " ", "h", " ", "\[Delta]"}]}], ")"}]}]}], 
                 ")"}]}]}], ")"}], "2"]}]]}], "-", 
         RowBox[{"2", " ", "c", " ", "h", " ", 
          SuperscriptBox["sf", "2"], " ", "\[Delta]", " ", 
          SqrtBox[
           RowBox[{
            RowBox[{
             RowBox[{"-", "8"}], " ", 
             RowBox[{"(", 
              RowBox[{
               RowBox[{"-", "1"}], "+", "c"}], ")"}], " ", "sf", " ", 
             RowBox[{"(", 
              RowBox[{
               RowBox[{"-", "1"}], "-", "\[Delta]", "+", 
               RowBox[{"h", " ", 
                RowBox[{"(", 
                 RowBox[{"2", "+", "\[Delta]"}], ")"}]}]}], ")"}], " ", 
             RowBox[{"(", 
              RowBox[{"1", "+", 
               RowBox[{"h", " ", "sf"}], "+", 
               RowBox[{"c", " ", 
                RowBox[{"(", 
                 RowBox[{
                  RowBox[{"-", "1"}], "-", 
                  RowBox[{"2", " ", "\[Delta]"}], "+", 
                  RowBox[{"h", " ", "sf", " ", 
                   RowBox[{"(", 
                    RowBox[{"3", "+", 
                    RowBox[{"2", " ", "\[Delta]"}]}], ")"}]}]}], ")"}]}]}], 
              ")"}]}], "+", 
            SuperscriptBox[
             RowBox[{"(", 
              RowBox[{
               RowBox[{
                RowBox[{"(", 
                 RowBox[{
                  RowBox[{"-", "1"}], "+", 
                  RowBox[{"h", " ", "sf"}]}], ")"}], " ", "\[Delta]"}], "+", 
               RowBox[{"c", " ", 
                RowBox[{"(", 
                 RowBox[{"\[Delta]", "+", 
                  RowBox[{"sf", " ", 
                   RowBox[{"(", 
                    RowBox[{"4", "-", 
                    RowBox[{"8", " ", "h"}], "+", 
                    RowBox[{"4", " ", "\[Delta]"}], "-", 
                    RowBox[{"5", " ", "h", " ", "\[Delta]"}]}], ")"}]}]}], 
                 ")"}]}]}], ")"}], "2"]}]]}], "-", 
         RowBox[{
          SuperscriptBox["h", "2"], " ", 
          SuperscriptBox["sf", "2"], " ", "\[Delta]", " ", 
          SqrtBox[
           RowBox[{
            RowBox[{
             RowBox[{"-", "8"}], " ", 
             RowBox[{"(", 
              RowBox[{
               RowBox[{"-", "1"}], "+", "c"}], ")"}], " ", "sf", " ", 
             RowBox[{"(", 
              RowBox[{
               RowBox[{"-", "1"}], "-", "\[Delta]", "+", 
               RowBox[{"h", " ", 
                RowBox[{"(", 
                 RowBox[{"2", "+", "\[Delta]"}], ")"}]}]}], ")"}], " ", 
             RowBox[{"(", 
              RowBox[{"1", "+", 
               RowBox[{"h", " ", "sf"}], "+", 
               RowBox[{"c", " ", 
                RowBox[{"(", 
                 RowBox[{
                  RowBox[{"-", "1"}], "-", 
                  RowBox[{"2", " ", "\[Delta]"}], "+", 
                  RowBox[{"h", " ", "sf", " ", 
                   RowBox[{"(", 
                    RowBox[{"3", "+", 
                    RowBox[{"2", " ", "\[Delta]"}]}], ")"}]}]}], ")"}]}]}], 
              ")"}]}], "+", 
            SuperscriptBox[
             RowBox[{"(", 
              RowBox[{
               RowBox[{
                RowBox[{"(", 
                 RowBox[{
                  RowBox[{"-", "1"}], "+", 
                  RowBox[{"h", " ", "sf"}]}], ")"}], " ", "\[Delta]"}], "+", 
               RowBox[{"c", " ", 
                RowBox[{"(", 
                 RowBox[{"\[Delta]", "+", 
                  RowBox[{"sf", " ", 
                   RowBox[{"(", 
                    RowBox[{"4", "-", 
                    RowBox[{"8", " ", "h"}], "+", 
                    RowBox[{"4", " ", "\[Delta]"}], "-", 
                    RowBox[{"5", " ", "h", " ", "\[Delta]"}]}], ")"}]}]}], 
                 ")"}]}]}], ")"}], "2"]}]]}], "-", 
         RowBox[{"3", " ", "c", " ", 
          SuperscriptBox["h", "2"], " ", 
          SuperscriptBox["sf", "2"], " ", "\[Delta]", " ", 
          SqrtBox[
           RowBox[{
            RowBox[{
             RowBox[{"-", "8"}], " ", 
             RowBox[{"(", 
              RowBox[{
               RowBox[{"-", "1"}], "+", "c"}], ")"}], " ", "sf", " ", 
             RowBox[{"(", 
              RowBox[{
               RowBox[{"-", "1"}], "-", "\[Delta]", "+", 
               RowBox[{"h", " ", 
                RowBox[{"(", 
                 RowBox[{"2", "+", "\[Delta]"}], ")"}]}]}], ")"}], " ", 
             RowBox[{"(", 
              RowBox[{"1", "+", 
               RowBox[{"h", " ", "sf"}], "+", 
               RowBox[{"c", " ", 
                RowBox[{"(", 
                 RowBox[{
                  RowBox[{"-", "1"}], "-", 
                  RowBox[{"2", " ", "\[Delta]"}], "+", 
                  RowBox[{"h", " ", "sf", " ", 
                   RowBox[{"(", 
                    RowBox[{"3", "+", 
                    RowBox[{"2", " ", "\[Delta]"}]}], ")"}]}]}], ")"}]}]}], 
              ")"}]}], "+", 
            SuperscriptBox[
             RowBox[{"(", 
              RowBox[{
               RowBox[{
                RowBox[{"(", 
                 RowBox[{
                  RowBox[{"-", "1"}], "+", 
                  RowBox[{"h", " ", "sf"}]}], ")"}], " ", "\[Delta]"}], "+", 
               RowBox[{"c", " ", 
                RowBox[{"(", 
                 RowBox[{"\[Delta]", "+", 
                  RowBox[{"sf", " ", 
                   RowBox[{"(", 
                    RowBox[{"4", "-", 
                    RowBox[{"8", " ", "h"}], "+", 
                    RowBox[{"4", " ", "\[Delta]"}], "-", 
                    RowBox[{"5", " ", "h", " ", "\[Delta]"}]}], ")"}]}]}], 
                 ")"}]}]}], ")"}], "2"]}]]}], "+", 
         RowBox[{"2", " ", "c", " ", 
          SuperscriptBox["h", "2"], " ", 
          SuperscriptBox["sf", "3"], " ", "\[Delta]", " ", 
          SqrtBox[
           RowBox[{
            RowBox[{
             RowBox[{"-", "8"}], " ", 
             RowBox[{"(", 
              RowBox[{
               RowBox[{"-", "1"}], "+", "c"}], ")"}], " ", "sf", " ", 
             RowBox[{"(", 
              RowBox[{
               RowBox[{"-", "1"}], "-", "\[Delta]", "+", 
               RowBox[{"h", " ", 
                RowBox[{"(", 
                 RowBox[{"2", "+", "\[Delta]"}], ")"}]}]}], ")"}], " ", 
             RowBox[{"(", 
              RowBox[{"1", "+", 
               RowBox[{"h", " ", "sf"}], "+", 
               RowBox[{"c", " ", 
                RowBox[{"(", 
                 RowBox[{
                  RowBox[{"-", "1"}], "-", 
                  RowBox[{"2", " ", "\[Delta]"}], "+", 
                  RowBox[{"h", " ", "sf", " ", 
                   RowBox[{"(", 
                    RowBox[{"3", "+", 
                    RowBox[{"2", " ", "\[Delta]"}]}], ")"}]}]}], ")"}]}]}], 
              ")"}]}], "+", 
            SuperscriptBox[
             RowBox[{"(", 
              RowBox[{
               RowBox[{
                RowBox[{"(", 
                 RowBox[{
                  RowBox[{"-", "1"}], "+", 
                  RowBox[{"h", " ", "sf"}]}], ")"}], " ", "\[Delta]"}], "+", 
               RowBox[{"c", " ", 
                RowBox[{"(", 
                 RowBox[{"\[Delta]", "+", 
                  RowBox[{"sf", " ", 
                   RowBox[{"(", 
                    RowBox[{"4", "-", 
                    RowBox[{"8", " ", "h"}], "+", 
                    RowBox[{"4", " ", "\[Delta]"}], "-", 
                    RowBox[{"5", " ", "h", " ", "\[Delta]"}]}], ")"}]}]}], 
                 ")"}]}]}], ")"}], "2"]}]]}]}], ")"}], "/", 
       RowBox[{"(", 
        RowBox[{"2", " ", 
         RowBox[{"(", 
          RowBox[{
           RowBox[{
            SuperscriptBox[
             RowBox[{"(", 
              RowBox[{
               RowBox[{"-", "1"}], "+", "c"}], ")"}], "2"], " ", 
            SuperscriptBox["\[Delta]", "2"]}], "+", 
           RowBox[{
            SuperscriptBox["h", "3"], " ", 
            SuperscriptBox["sf", "4"], " ", 
            SuperscriptBox[
             RowBox[{"(", 
              RowBox[{"1", "+", 
               RowBox[{"c", " ", 
                RowBox[{"(", 
                 RowBox[{"3", "+", 
                  RowBox[{"2", " ", "\[Delta]"}]}], ")"}]}]}], ")"}], "2"]}], 
           "+", 
           RowBox[{"sf", " ", 
            RowBox[{"(", 
             RowBox[{"1", "-", 
              RowBox[{"2", " ", "\[Delta]"}], "+", 
              RowBox[{"h", " ", 
               RowBox[{"(", 
                RowBox[{
                 RowBox[{"-", "2"}], "+", 
                 RowBox[{"2", " ", "\[Delta]"}], "-", 
                 RowBox[{"3", " ", 
                  SuperscriptBox["\[Delta]", "2"]}]}], ")"}]}], "+", 
              RowBox[{"2", " ", "c", " ", 
               RowBox[{"(", 
                RowBox[{
                 RowBox[{"-", "1"}], "+", 
                 RowBox[{"2", " ", 
                  SuperscriptBox["\[Delta]", "2"]}], "+", 
                 RowBox[{"h", " ", 
                  RowBox[{"(", 
                   RowBox[{"2", "+", 
                    RowBox[{"2", " ", "\[Delta]"}], "+", 
                    SuperscriptBox["\[Delta]", "2"]}], ")"}]}]}], ")"}]}], 
              "+", 
              RowBox[{
               SuperscriptBox["c", "2"], " ", 
               RowBox[{"(", 
                RowBox[{"1", "+", 
                 RowBox[{"2", " ", "\[Delta]"}], "-", 
                 RowBox[{"h", " ", 
                  RowBox[{"(", 
                   RowBox[{"2", "+", 
                    RowBox[{"6", " ", "\[Delta]"}], "+", 
                    RowBox[{"7", " ", 
                    SuperscriptBox["\[Delta]", "2"]}]}], ")"}]}]}], ")"}]}]}],
              ")"}]}], "-", 
           RowBox[{"h", " ", 
            SuperscriptBox["sf", "3"], " ", 
            RowBox[{"(", 
             RowBox[{
              RowBox[{"2", " ", "c", " ", 
               RowBox[{"(", 
                RowBox[{
                 RowBox[{
                  RowBox[{"-", "4"}], " ", 
                  RowBox[{"(", 
                   RowBox[{"1", "+", "\[Delta]"}], ")"}]}], "+", 
                 RowBox[{"h", " ", 
                  RowBox[{"(", 
                   RowBox[{"3", "-", 
                    RowBox[{"2", " ", 
                    SuperscriptBox["\[Delta]", "2"]}]}], ")"}]}], "+", 
                 RowBox[{
                  SuperscriptBox["h", "2"], " ", 
                  RowBox[{"(", 
                   RowBox[{"6", "+", 
                    RowBox[{"6", " ", "\[Delta]"}], "+", 
                    SuperscriptBox["\[Delta]", "2"]}], ")"}]}]}], ")"}]}], 
              "+", 
              RowBox[{"h", " ", 
               RowBox[{"(", 
                RowBox[{
                 RowBox[{"-", "7"}], "-", 
                 RowBox[{"6", " ", "\[Delta]"}], "+", 
                 RowBox[{"h", " ", 
                  RowBox[{"(", 
                   RowBox[{"10", "+", 
                    RowBox[{"6", " ", "\[Delta]"}], "+", 
                    SuperscriptBox["\[Delta]", "2"]}], ")"}]}]}], ")"}]}], 
              "+", 
              RowBox[{
               SuperscriptBox["c", "2"], " ", 
               RowBox[{"(", 
                RowBox[{
                 RowBox[{
                  RowBox[{"-", "8"}], " ", 
                  RowBox[{"(", 
                   RowBox[{"1", "+", "\[Delta]"}], ")"}]}], "+", 
                 RowBox[{
                  SuperscriptBox["h", "2"], " ", 
                  RowBox[{"(", 
                   RowBox[{"10", "+", 
                    RowBox[{"14", " ", "\[Delta]"}], "+", 
                    RowBox[{"5", " ", 
                    SuperscriptBox["\[Delta]", "2"]}]}], ")"}]}], "+", 
                 RowBox[{"h", " ", 
                  RowBox[{"(", 
                   RowBox[{"17", "+", 
                    RowBox[{"22", " ", "\[Delta]"}], "+", 
                    RowBox[{"8", " ", 
                    SuperscriptBox["\[Delta]", "2"]}]}], ")"}]}]}], ")"}]}]}],
              ")"}]}], "+", 
           RowBox[{
            SuperscriptBox["sf", "2"], " ", 
            RowBox[{"(", 
             RowBox[{
              RowBox[{"8", " ", 
               RowBox[{"(", 
                RowBox[{"1", "+", "\[Delta]"}], ")"}]}], "-", 
              RowBox[{"5", " ", "h", " ", 
               RowBox[{"(", 
                RowBox[{"5", "+", 
                 RowBox[{"4", " ", "\[Delta]"}]}], ")"}]}], "+", 
              RowBox[{
               SuperscriptBox["h", "2"], " ", 
               RowBox[{"(", 
                RowBox[{"20", "+", 
                 RowBox[{"12", " ", "\[Delta]"}], "+", 
                 RowBox[{"3", " ", 
                  SuperscriptBox["\[Delta]", "2"]}]}], ")"}]}], "+", 
              RowBox[{"2", " ", "c", " ", 
               RowBox[{"(", 
                RowBox[{
                 RowBox[{"4", " ", 
                  RowBox[{"(", 
                   RowBox[{"1", "+", "\[Delta]"}], ")"}]}], "+", 
                 RowBox[{
                  SuperscriptBox["h", "2"], " ", 
                  RowBox[{"(", 
                   RowBox[{"12", "+", 
                    RowBox[{"12", " ", "\[Delta]"}], "+", 
                    SuperscriptBox["\[Delta]", "2"]}], ")"}]}], "-", 
                 RowBox[{"h", " ", 
                  RowBox[{"(", 
                   RowBox[{"15", "+", 
                    RowBox[{"18", " ", "\[Delta]"}], "+", 
                    RowBox[{"4", " ", 
                    SuperscriptBox["\[Delta]", "2"]}]}], ")"}]}]}], ")"}]}], 
              "+", 
              RowBox[{
               SuperscriptBox["c", "2"], " ", "h", " ", 
               RowBox[{"(", 
                RowBox[{
                 RowBox[{"-", "9"}], "-", 
                 RowBox[{"8", " ", "\[Delta]"}], "+", 
                 RowBox[{"4", " ", 
                  SuperscriptBox["\[Delta]", "2"]}], "+", 
                 RowBox[{"h", " ", 
                  RowBox[{"(", 
                   RowBox[{"20", "+", 
                    RowBox[{"28", " ", "\[Delta]"}], "+", 
                    RowBox[{"11", " ", 
                    SuperscriptBox["\[Delta]", "2"]}]}], ")"}]}]}], ")"}]}]}],
              ")"}]}]}], ")"}]}], ")"}]}]}]}], "}"}]}], "}"}]], "Output",
 CellChangeTimes->{
  3.781875105173994*^9, 3.781875170162109*^9, {3.781875672576749*^9, 
   3.781875676961214*^9}, 3.781875825351769*^9, 3.78187591736909*^9, 
   3.781876477606761*^9, 3.781877569043977*^9, 3.781877675927492*^9, 
   3.781884304067277*^9, 3.7819497132392693`*^9, 3.781961305696556*^9, 
   3.785575757732452*^9, 3.78559449935441*^9, 3.8000118795670223`*^9, 
   3.800268330874473*^9, 3.814006516690022*^9, 3.8140067104966097`*^9, 
   3.8140075449729233`*^9, 3.814007588987846*^9, 3.814084697471445*^9, 
   3.814196549180375*^9},
 CellLabel->
  "Out[1366]=",ExpressionUUID->"3ba05cf0-15cb-4431-b1a8-b31ed054edce"]
}, Open  ]]
}, Closed]],

Cell[CellGroupData[{

Cell["Stability", "Subsection",
 CellChangeTimes->{{3.781465326981051*^9, 
  3.781465329029233*^9}},ExpressionUUID->"bd99752f-e3a9-4507-a41e-\
16f72d13af99"],

Cell["\<\
There are at least two immediately apparent equilibria: when drive is absent \
from the population and when drive is fixed in the population. 

We first find the Jacobian for the system:\
\>", "Text",
 CellChangeTimes->{3.814018732143256*^9, 
  3.814092016447557*^9},ExpressionUUID->"2e906936-97d9-44e1-a935-\
2be5e7061234"],

Cell[BoxData[{
 RowBox[{
  RowBox[{"recursions2", "=", 
   RowBox[{"{", 
    RowBox[{
    "Dmprime2", ",", " ", "dmprime2", ",", " ", "DDfprime2", ",", " ", 
     "Ddfprime2", ",", " ", "ddfprime2"}], "}"}]}], 
  ";"}], "\[IndentingNewLine]", 
 RowBox[{
  RowBox[{"jacob2", "=", 
   RowBox[{"Simplify", "[", 
    RowBox[{"Transpose", "[", 
     RowBox[{"{", 
      RowBox[{
       RowBox[{"D", "[", 
        RowBox[{"recursions2", ",", "Dm"}], "]"}], ",", " ", 
       RowBox[{"D", "[", 
        RowBox[{"recursions2", ",", "dm"}], "]"}], ",", " ", 
       RowBox[{"D", "[", 
        RowBox[{"recursions2", ",", " ", "DDf"}], "]"}], ",", " ", 
       RowBox[{"D", "[", 
        RowBox[{"recursions2", ",", " ", "Ddf"}], "]"}], ",", " ", 
       RowBox[{"D", "[", 
        RowBox[{"recursions2", ",", " ", "ddf"}], "]"}]}], "}"}], "]"}], 
    "]"}]}], ";"}]}], "Input",
 CellChangeTimes->{{3.781465345288929*^9, 3.781465345456649*^9}, {
  3.781511024565343*^9, 3.7815110446207*^9}, {3.781511354597693*^9, 
  3.7815113827574787`*^9}},
 CellLabel->
  "In[1367]:=",ExpressionUUID->"f15f9af6-18ce-4a44-acc5-bbe08526fe99"],

Cell["\<\
And then we assess the conditions under which the drive-absent and \
drive-fixed equilibria are stable/instable. \
\>", "Text",
 CellChangeTimes->{
  3.814018737227765*^9},ExpressionUUID->"fe4e26a8-f4e0-41b2-b4dc-\
01f75780b3bf"],

Cell[CellGroupData[{

Cell["drive absent (pm=pf=0) equilibrium", "Subsubsection",
 CellChangeTimes->{{3.7814653542305307`*^9, 3.7814653590889*^9}, 
   3.814018723199863*^9},ExpressionUUID->"ddc39688-4044-459a-8251-\
86bb830d06bd"],

Cell["\<\
To evaluate the stability of the equilibrium where drive is absent we \
consider the eigenvalues of the Jacobian at this point (substituting pf->0, \
pm->0, and the equilibrium population size without drive). The equilibrium is \
unstable whenever it has an eigenvalue with absolute value > 1.\
\>", "Text",
 CellChangeTimes->{{3.7814654517132387`*^9, 3.781465455407995*^9}, 
   3.814084704719413*^9},ExpressionUUID->"299b84b6-b272-4a8b-b5a7-\
5add72f98c62"],

Cell[CellGroupData[{

Cell[BoxData[{
 RowBox[{
  RowBox[{"Simplify", "[", 
   RowBox[{
    RowBox[{
     RowBox[{
      RowBox[{"jacob2", "/.", 
       RowBox[{"subeq", "[", 
        RowBox[{"[", "1", "]"}], "]"}]}], "/.", 
      RowBox[{"pf", "\[Rule]", "0"}]}], "/.", 
     RowBox[{"pm", "\[Rule]", "0"}]}], "/.", 
    RowBox[{"noDrivePopSizeSol2", "[", 
     RowBox[{"[", "2", "]"}], "]"}]}], "]"}], ";"}], "\[IndentingNewLine]", 
 RowBox[{"charpolynomial02", "=", 
  RowBox[{"Factor", "[", 
   RowBox[{"Det", "[", 
    RowBox[{"%", "-", 
     RowBox[{"\[Lambda]", "*", 
      RowBox[{"IdentityMatrix", "[", "5", "]"}]}]}], "]"}], "]"}]}]}], "Input",
 CellChangeTimes->{{3.814009388479999*^9, 3.8140094011923647`*^9}, {
   3.814009435990284*^9, 3.814009472662134*^9}, {3.814009517855748*^9, 
   3.8140095446179943`*^9}, 3.8140095798181334`*^9, {3.814009653572708*^9, 
   3.8140096651062803`*^9}, {3.814009729946822*^9, 3.8140097521423693`*^9}},
 CellLabel->
  "In[1369]:=",ExpressionUUID->"ce804ada-232a-456f-84c5-36048946ac34"],

Cell[BoxData[
 RowBox[{"-", 
  FractionBox[
   RowBox[{
    SuperscriptBox["\[Lambda]", "2"], " ", 
    RowBox[{"(", 
     RowBox[{
      RowBox[{"-", "4"}], "+", "b", "+", 
      RowBox[{"2", " ", "\[Lambda]"}]}], ")"}], " ", 
    RowBox[{"(", 
     RowBox[{
      RowBox[{
       RowBox[{"-", "2"}], " ", "c"}], "+", 
      RowBox[{"2", " ", "c", " ", "h", " ", "sf"}], "+", 
      RowBox[{"2", " ", "c", " ", "sm"}], "-", 
      RowBox[{"2", " ", "c", " ", "h", " ", "sf", " ", "sm"}], "-", 
      RowBox[{"2", " ", "c", " ", "\[Delta]"}], "+", 
      RowBox[{"2", " ", "c", " ", "h", " ", "sf", " ", "\[Delta]"}], "+", 
      RowBox[{"2", " ", "c", " ", "sm", " ", "\[Delta]"}], "-", 
      RowBox[{
      "2", " ", "c", " ", "h", " ", "sf", " ", "sm", " ", "\[Delta]"}], "-", 
      "\[Lambda]", "-", 
      RowBox[{"c", " ", "\[Lambda]"}], "+", 
      RowBox[{"h", " ", "sf", " ", "\[Lambda]"}], "+", 
      RowBox[{"c", " ", "h", " ", "sf", " ", "\[Lambda]"}], "+", 
      RowBox[{"2", " ", 
       SuperscriptBox["\[Lambda]", "2"]}], "+", 
      RowBox[{"2", " ", "c", " ", 
       SuperscriptBox["\[Lambda]", "2"]}]}], ")"}]}], 
   RowBox[{"4", " ", 
    RowBox[{"(", 
     RowBox[{"1", "+", "c"}], ")"}]}]]}]], "Output",
 CellChangeTimes->{{3.814009396578875*^9, 3.814009473040482*^9}, {
   3.814009522575335*^9, 3.814009546081353*^9}, 3.814009580161955*^9, {
   3.814009653911927*^9, 3.8140096653633537`*^9}, {3.814009731293776*^9, 
   3.814009752479535*^9}, 3.814084699204679*^9, 3.814196550697547*^9},
 CellLabel->
  "Out[1370]=",ExpressionUUID->"b8275a37-31a0-4c71-ae64-965dc064d9ae"]
}, Open  ]],

Cell[TextData[{
 "The factor ",
 Cell[BoxData[
  RowBox[{"-",
[truncated: 821,863 more chars]
