# Supplementary material
Source: publisher figshare collection journal article supplement (https://gsajournals.figshare.com/ndownloader/files/25533044)

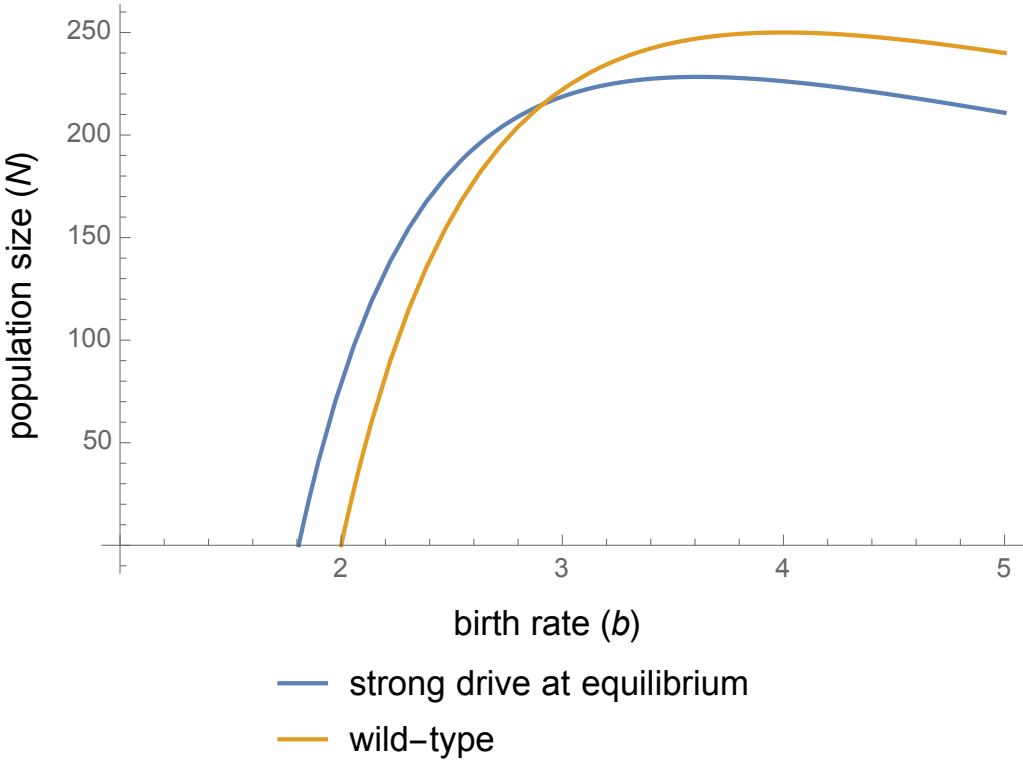

Supplement: Supplementary file 1 [file 25533044 › Supplementary Material/SI_birth_rate.pdf]
